# Supplementary material for: Diversity oriented synthesis of 6-nitro- and 6-aminoquinolones and their activity as alkaline phosphatase inhibitors
Source: Royal Society of Chemistry journal article supplement (doi:10.1039/c5ra10948e), 2015-01-01

Supplementary Information

**Diversity oriented synthesis of 6-Nitro- and 6-Aminoquinolones and their activity as alkaline phosphatase inhibitors**

Mariia Miliutina,<sup>a</sup> Anton Ivanov,<sup>a</sup> Syeda Abida Ejaz,<sup>b</sup> Jamshed Iqbal,<sup>b</sup> Alexander Villinger,<sup>a</sup> Viktor O. Iaroshenko,<sup>a,c,\*</sup>, Peter Langer<sup>a,d,\*</sup>

<sup>a</sup> *Institut für Chemie, Universität Rostock, Albert Einstein Str. 3a, 18059 Rostock, Germany;*  
[peter.langer@uni-rostock.de](mailto:peter.langer@uni-rostock.de); [iva108@googlemail.com](mailto:iva108@googlemail.com)

<sup>b</sup> *Centre for Advanced Drug Research, COMSATS Institute of Information Technology, Abbottabad, Pakistan*

<sup>c</sup> *National Taras Shevchenko University, 62 Volodymyrska Str., 01033 Kyiv, Ukraine.*

<sup>d</sup> *Leibniz Institut für Katalyse an der Universität Rostock e.V., Albert Einstein Str. 29a, 18059 Rostock, Germany*

|                                                                 |     |
|-----------------------------------------------------------------|-----|
| Copies of <sup>1</sup> H and <sup>13</sup> C NMR spectras ..... | 1   |
| X-Ray structure of compound 7ab .....                           | 146 |
| X-Ray structure of compound 7ac.....                            | 147 |
| X-Ray structure of compound 7bd.....                            | 148 |
| X-Ray structure of compound 15 .....                            | 149 |
| X-Ray structure of compound 16.....                             | 150 |

Copies of <sup>1</sup>H and <sup>13</sup>C NMR spectras

1-(2-Chloro-5-nitrophenyl)-3-*p*-tolylprop-2-yn-1-one (6a).

Miliutina MM-104.4 1H CDC13

|      |      |      |      |      |      |      |
|------|------|------|------|------|------|------|
| 8.91 | 8.21 | 7.98 | 7.66 | 7.55 | 7.25 | 7.22 |
| ∨    | ∨    | ∨    | ∨    | ∨    | ∨    | ∨    |

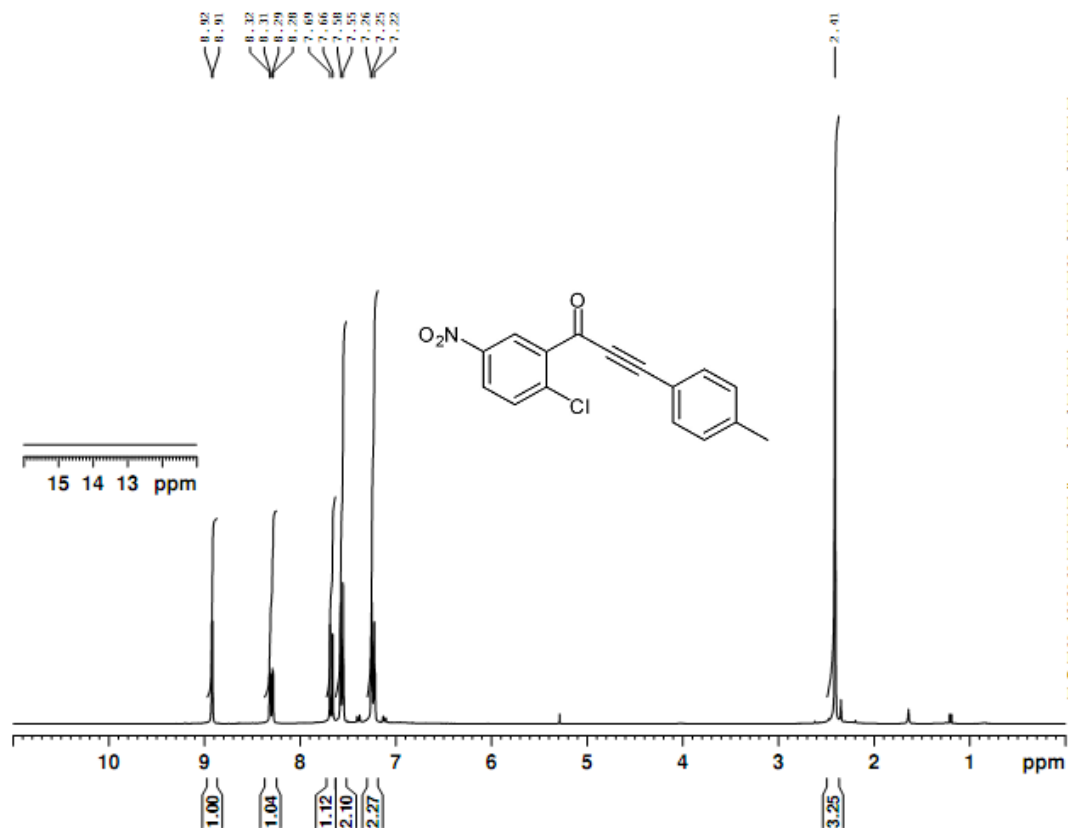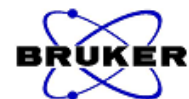

NAME 111020.u320  
 EXPNO 10  
 PROCNO 1  
 Date\_ 20111020  
 Time 13.31  
 INSTRUM spect  
 PROBHD 5 mm PABBO BB-  
 PULPROG zg30  
 TD 65536  
 SOLVENT CDCl3  
 NS 16  
 DS 2  
 SWH 6188.119 Hz  
 FIDRES 0.094423 Hz  
 AQ 5.2953587 sec  
 RG 80.6  
 DW 80.800 usec  
 DE 10.00 usec  
 TE 296.0 K  
 D1 1.00000000 sec  
 TDO 1

===== CHANNEL f1 =====  
 NUC1 1H  
 P1 10.00 usec  
 PL1 0.00 dB  
 PL1W 11.25325108 W  
 SFO1 300.1318534 MHz  
 SI 32768  
 SF 300.1300086 MHz  
 WDW EM  
 SSB 0  
 LB 0.30 Hz  
 GB 0  
 PC 1.00

1-(2-Chloro-5-nitrophenyl)-3-*p*-tolylprop-2-yn-1-one (6a).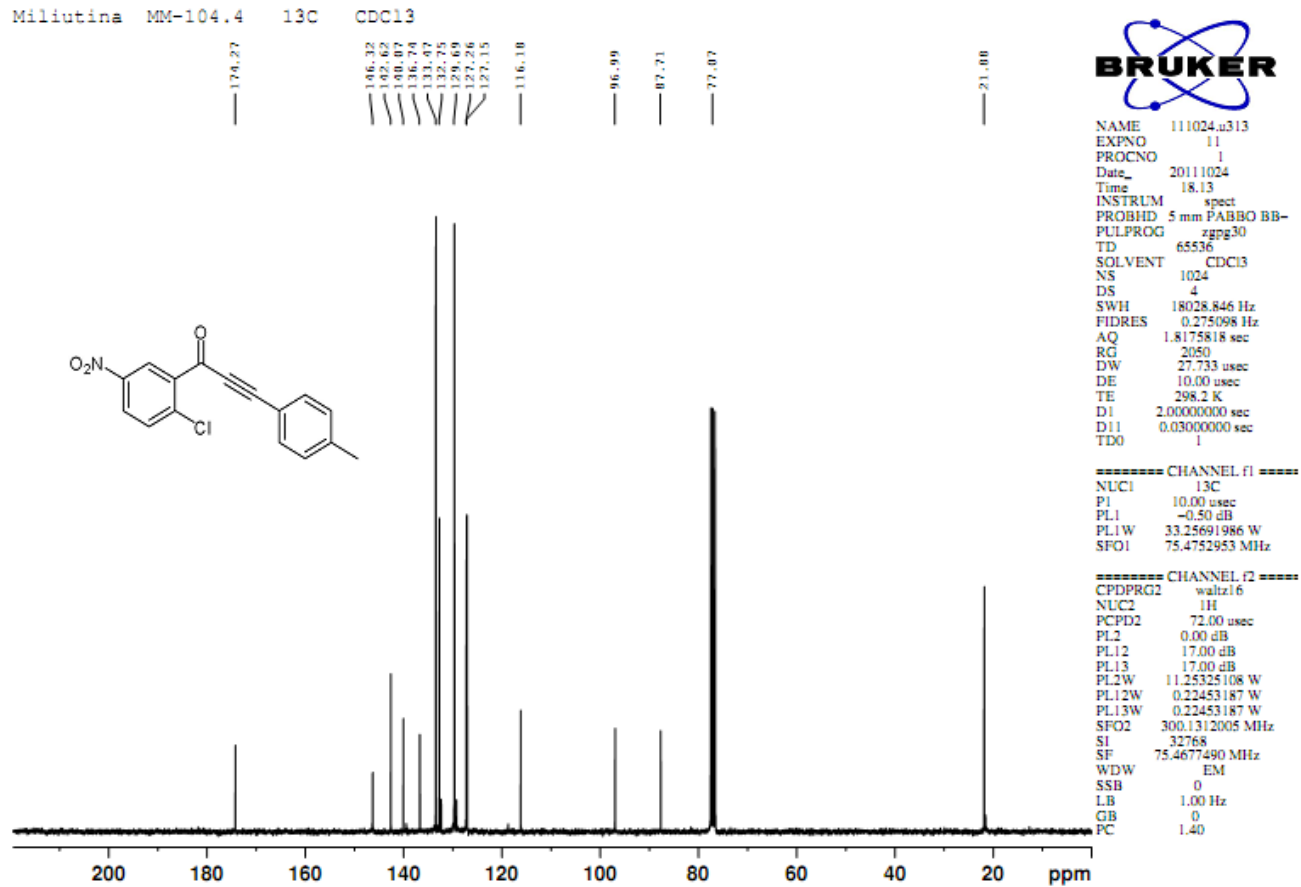

## 1-(2-Chloro-5-nitrophenyl)-3-phenylprop-2-yn-1-one (6b).

Miliutina MM-78 1H CDCl3

8.93  
8.93  
8.33  
8.33  
8.30  
8.30  
7.70  
7.62  
7.66  
7.55  
7.55  
7.53  
7.53  
7.51  
7.51  
7.49  
7.49  
7.41  
7.41  
7.26

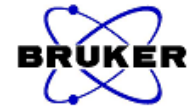

NAME 110606.u335  
EXPNO 10  
PROCNO 1  
Date\_ 20110606  
Time 14.51  
INSTRUM spect  
PROBHD 5 mm PABBO BB-  
PULPROG zg30  
TD 65536  
SOLVENT CDCl3  
NS 16  
DS 2  
SWH 6188.119 Hz  
FIDRES 0.094423 Hz  
AQ 5.2953587 sec  
RG 114  
DW 80.800 usec  
DE 10.00 usec  
TE 298.6 K  
D1 1.0000000 sec  
TD0 1

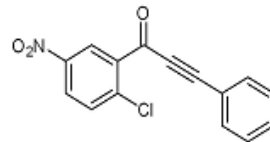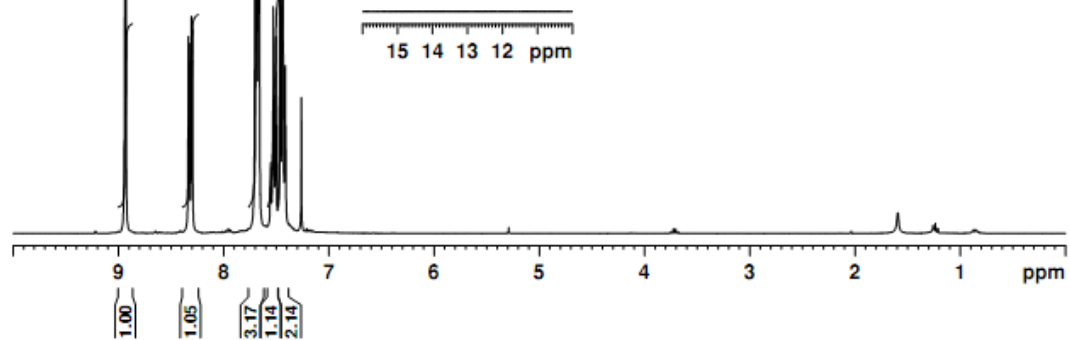

===== CHANNEL f1 =====  
NUC1 1H  
P1 10.00 usec  
PL1 0.00 dB  
PL1W 11.25325108 W  
SFO1 300.1318534 MHz  
SI 32768  
SF 300.1300094 MHz  
WDW EM  
SSB 0  
LB 0.30 Hz  
GB 0  
PC 1.00



## 1-(2-Chloro-5-nitrophenyl)-3-phenylprop-2-yn-1-one (6b).

Miliutina MM-78.3 13C CDCl3

174.24  
 146.32  
 140.11  
 136.58  
 133.38  
 132.77  
 131.60  
 129.75  
 127.23  
 119.28  
 96.12  
 87.62  
 77.03

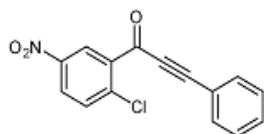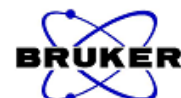

NAME 110715.209  
 EXPNO 10  
 PROCNO 1  
 Date\_ 20110716  
 Time 21.29  
 INSTRUM spect  
 PROBHD 5 mm F4BBO BB-  
 PULPROG zgpg30  
 TD 65536  
 SOLVENT CDCl3  
 NS 1024  
 DS 4  
 SWH 15000.000 Hz  
 FIDRES 0.228882 Hz  
 AQ 2.1845834 sec  
 RG 1620  
 DW 33.333 usec  
 DE 10.00 usec  
 TE 298.3 K  
 D1 2.0000000 sec  
 d11 0.0300000 sec  
 DELTA 1.89999998 sec  
 TD0 1

==== CHANNEL f1 ====  
 NUC1 13C  
 P1 10.00 usec  
 PL1 -1.00 dB  
 SFO1 62.9015280 MHz

==== CHANNEL f2 ====  
 CPDPRG2 waltz16  
 NUC2 1H  
 PCPD2 70.00 usec  
 PL12 15.00 dB  
 PL13 15.00 dB  
 PL2 -2.50 dB  
 SFO2 250.1310005 MHz  
 S1 32768  
 SF 62.8952390 MHz  
 WDW EM  
 SSB 0  
 LB 1.00 Hz  
 GB 0  
 PC 1.40

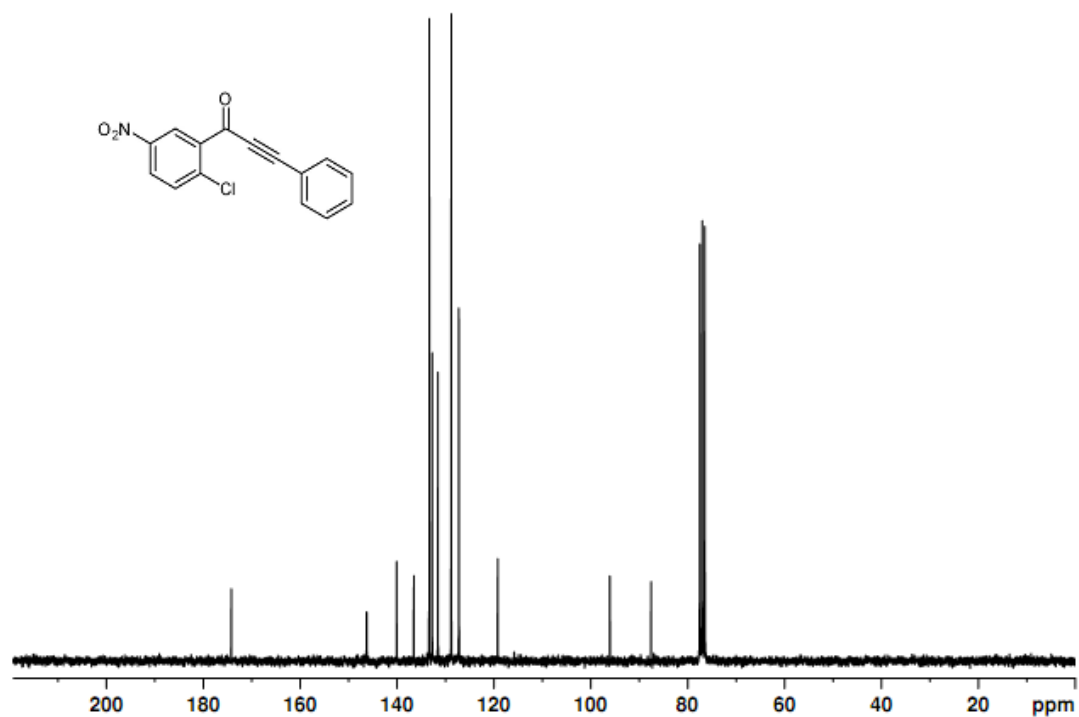



## 1-(2-chloro-5-nitrophenyl)hept-2-yn-1-one (6c).

Miliutina, MM-88.4, CDCl<sub>3</sub>, 13C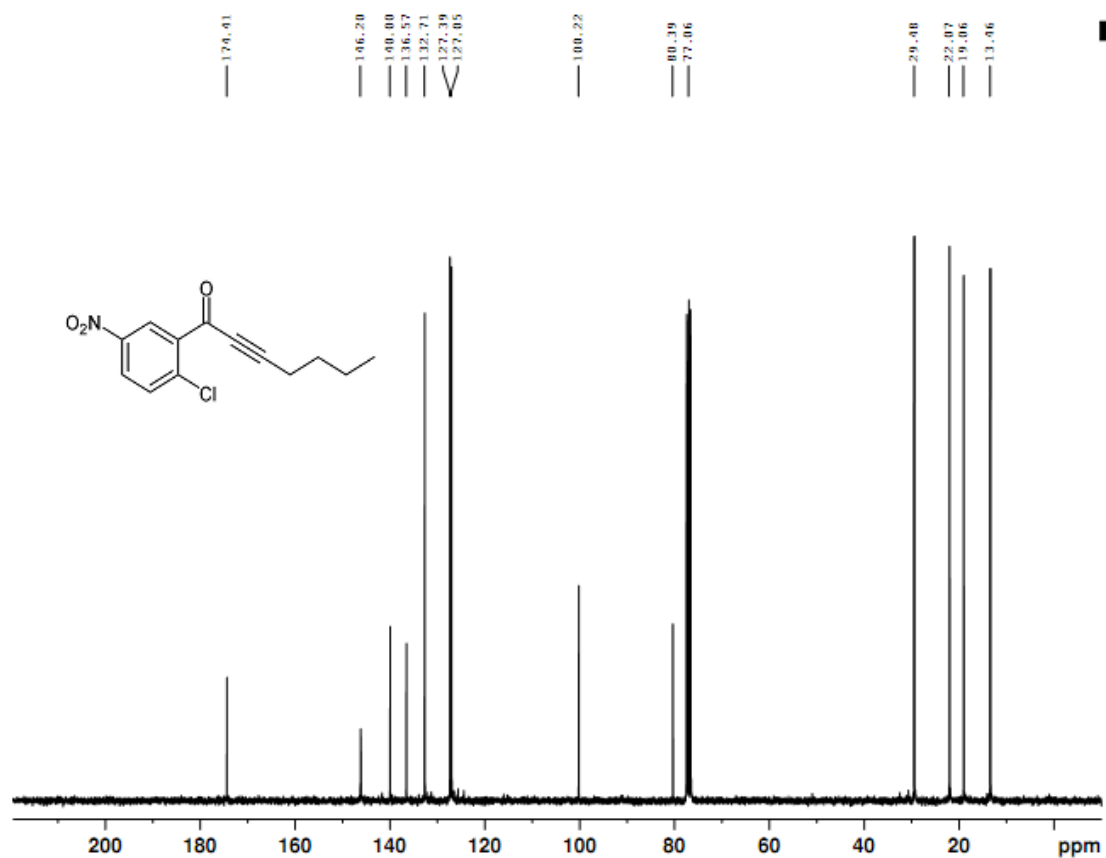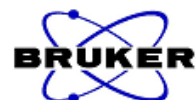

NAME 120113.u320  
 EXPNO 11  
 PROCNO 1  
 Date\_ 20120114  
 Time 15.13  
 INSTRUM spect  
 PROBHD 5 mm PABBO BB-  
 PULPROG zgpg30  
 TD 65536  
 SOLVENT CDCl<sub>3</sub>  
 NS 1024  
 DS 4  
 SWH 18028.846 Hz  
 FIDRES 0.275098 Hz  
 AQ 1.8175818 sec  
 RG 2050  
 DW 27.733 usec  
 DE 10.00 usec  
 TE 298.2 K  
 D1 2.0000000 sec  
 D11 0.03000000 sec  
 TDO 1

===== CHANNEL f1 =====  
 NUC1 13C  
 P1 10.00 usec  
 PL1 -0.50 dB  
 PL1W 33.25691986 W  
 SFO1 75.4752953 MHz

===== CHANNEL f2 =====  
 CPDPRG2 waltz16  
 NUC2 1H  
 PCPD2 72.00 usec  
 PL2 0.00 dB  
 PL12 17.00 dB  
 PL13 17.00 dB  
 PL2W 11.25325108 W  
 PL12W 0.22453187 W  
 PL13W 0.22453187 W  
 SFO2 300.1312005 MHz  
 SI 32768  
 SF 75.4677490 MHz  
 WDW EM  
 SSB 0  
 LB 1.00 Hz  
 GB 0  
 PC 1.40

## 1-(2-chloro-5-nitrophenyl)oct-2-yn-1-one (6d).

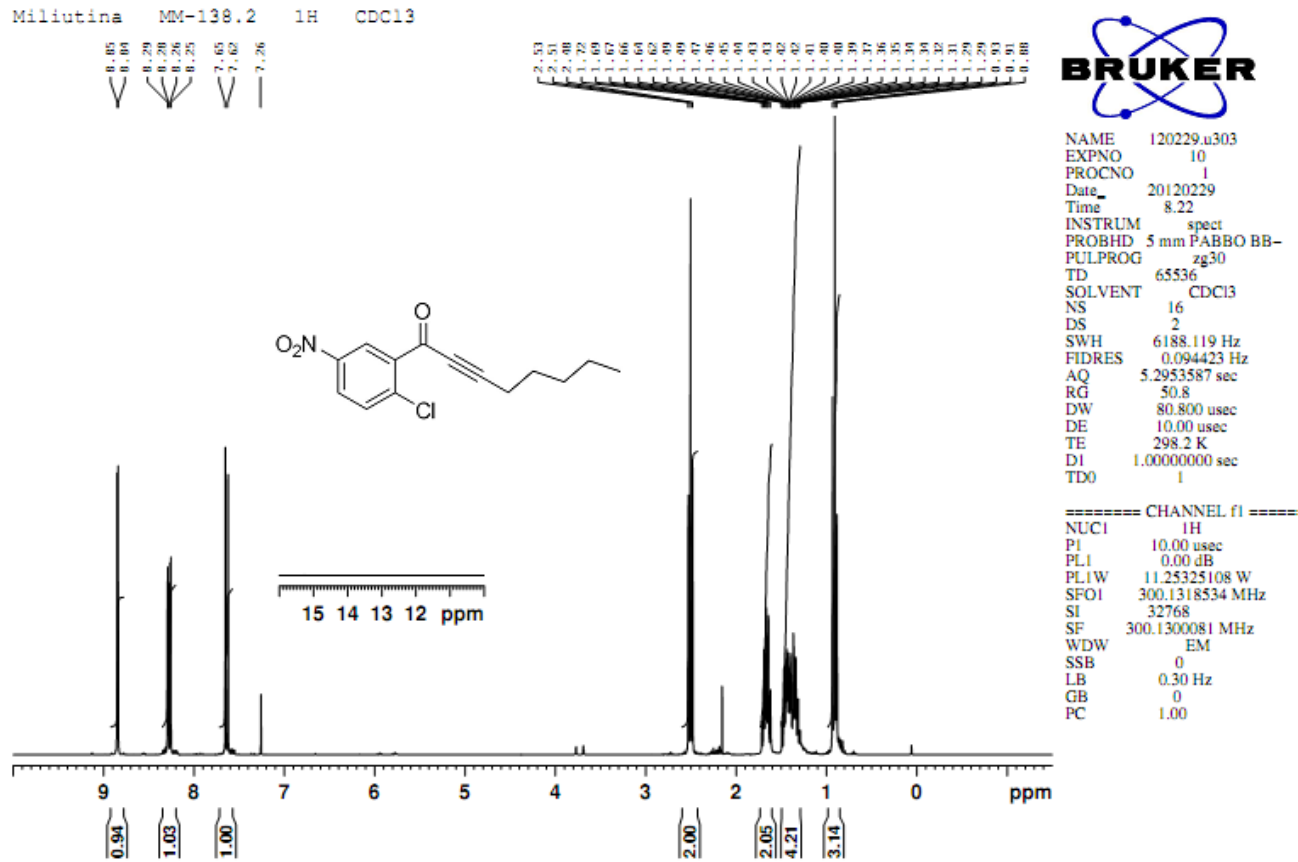

## 1-(2-chloro-5-nitrophenyl)oct-2-yn-1-one (6d).

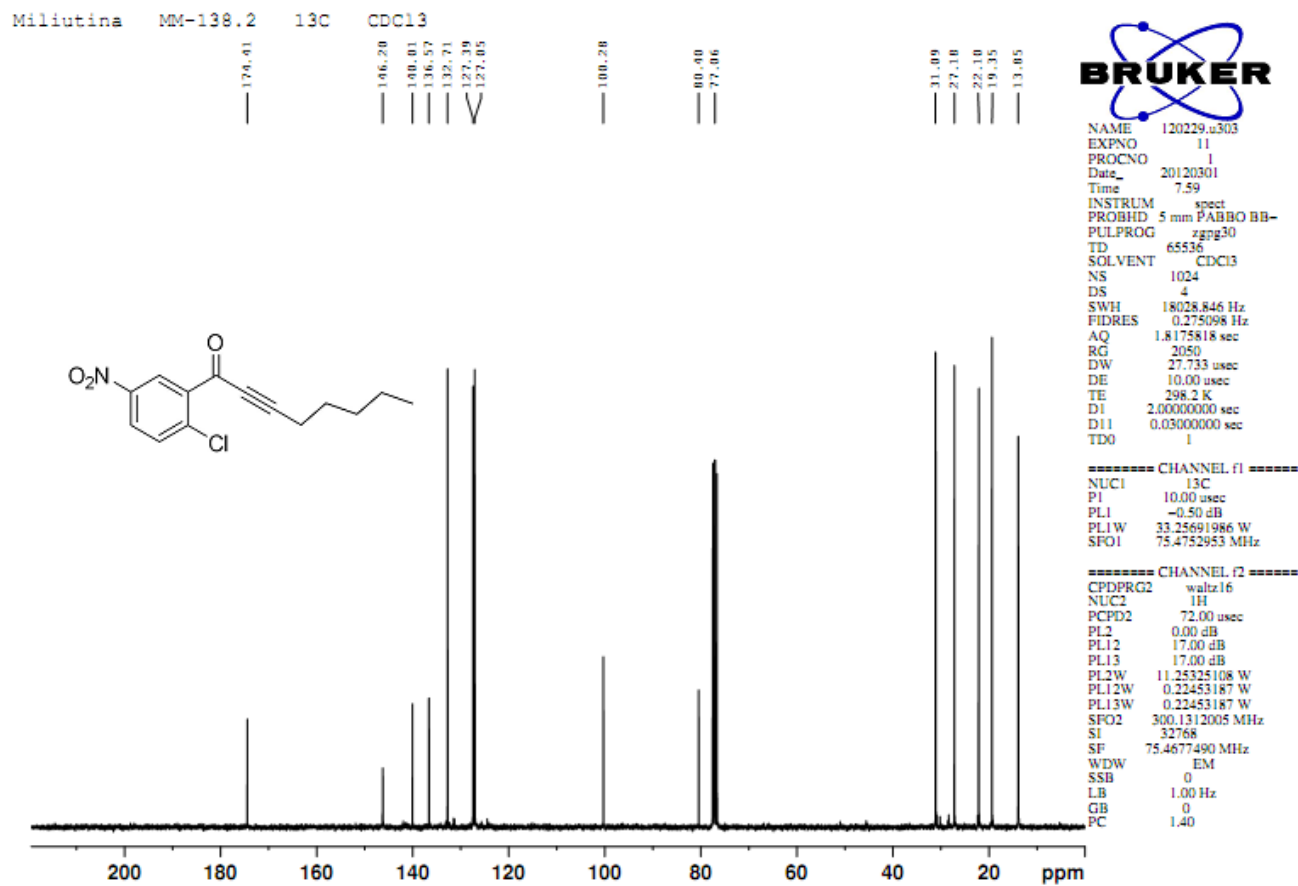

## 1-(3,4-Dimethoxyphenethyl)-6-nitro-2-p-tolylquinolin-4(1H)-one (7aa).

Mkrtchyan, MM109, DMSO, 1H

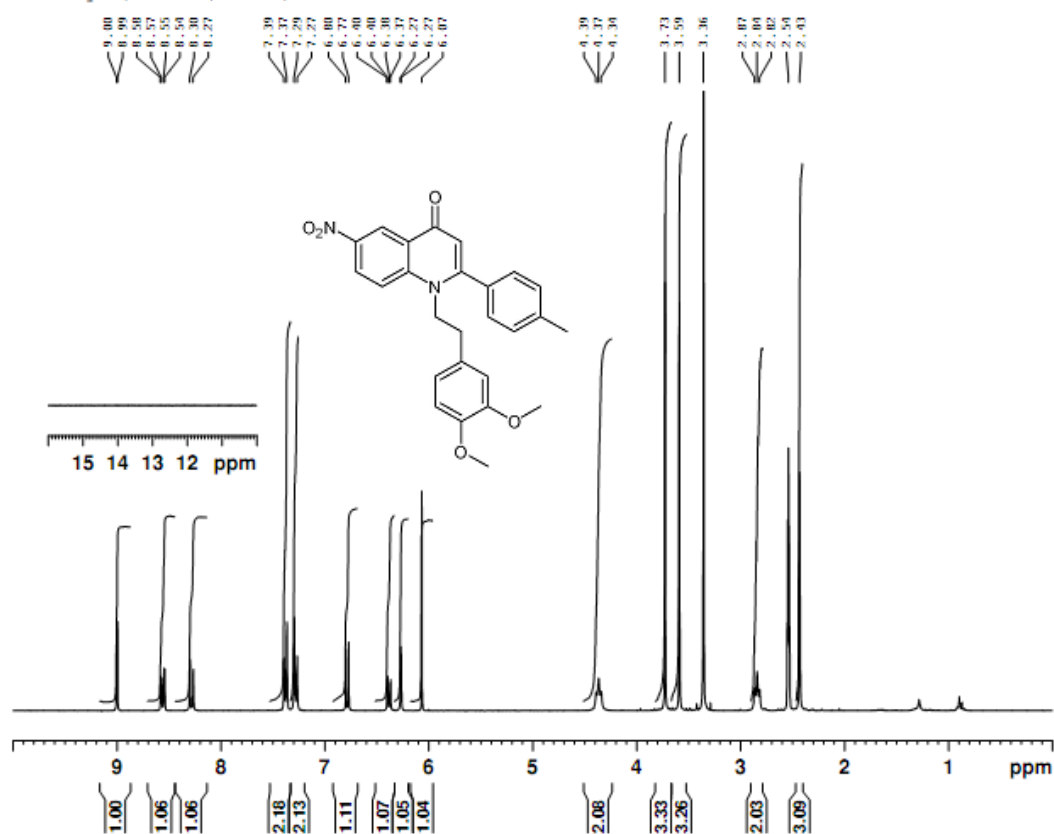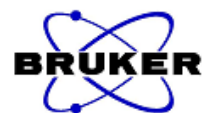

NAME 110819.u331  
 EXPNO 10  
 PROCNO 1  
 Date\_ 20110819  
 Time 11.49  
 INSTRUM spect  
 PROBHD 5 mm PABBO BB-  
 PULPROG zg30  
 TD 65536  
 SOLVENT DMSO  
 NS 16  
 DS 2  
 SWH 6188.119 Hz  
 FIDRES 0.094423 Hz  
 AQ 5.2953587 sec  
 RG 322  
 DW 80.800 usec  
 DE 10.00 usec  
 TE 298.2 K  
 D1 1.00000000 sec  
 TD0 1

===== CHANNEL f1 =====  
 NUC1 1H  
 P1 10.00 usec  
 PL1 0.00 dB  
 PL1W 11.25325108 W  
 SFO1 300.1318534 MHz  
 SI 32768  
 SF 300.1299951 MHz  
 WDW EM  
 SSB 0  
 LB 0.30 Hz  
 GB 0  
 PC 1.00

## 1-(3,4-Dimethoxyphenethyl)-6-nitro-2-p-tolylquinolin-4(1H)-one (7aa).

Mkrtchyan, MM-109, DMSO, 13C

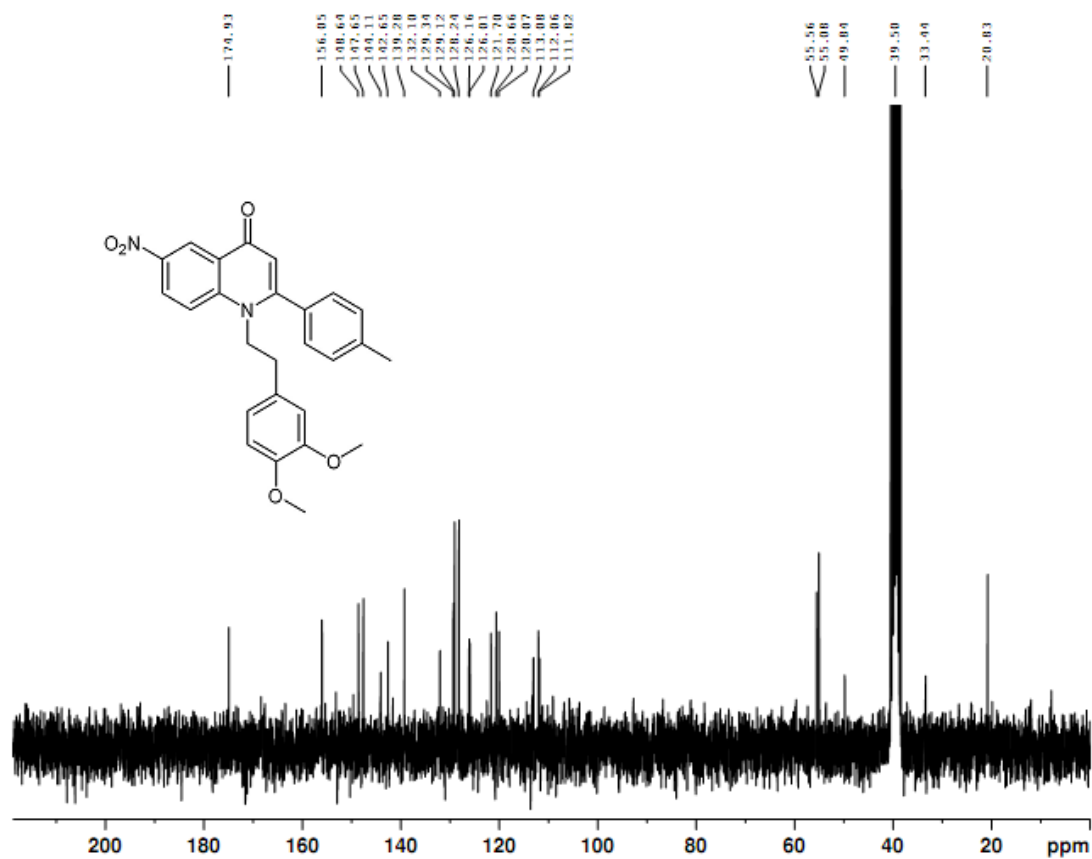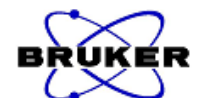

NAME 110819.217  
 EXPNO 10  
 PROCNO 1  
 Date\_ 20110821  
 Time 13.36  
 INSTRUM spect  
 PROBHD 5 mm PABBO BB-  
 PULPROG zgpg30  
 TD 65536  
 SOLVENT DMSO  
 NS 1024  
 DS 4  
 SWH 15000.000 Hz  
 FIDRES 0.228882 Hz  
 AQ 2.1845834 sec  
 RG 2050  
 DW 33.333 usec  
 DE 10.00 usec  
 TE 298.4 K  
 D1 2.0000000 sec  
 d11 0.0300000 sec  
 DELTA 1.8999999 sec  
 TD0 1

===== CHANNEL f1 =====  
 NUC1 13C  
 P1 10.00 usec  
 PL1 -1.00 dB  
 SFO1 62.9015280 MHz

===== CHANNEL f2 =====  
 CPDPRG2 waltz16  
 NUC2 1H  
 PCPD2 70.00 usec  
 PL12 15.00 dB  
 PL13 15.00 dB  
 PL2 -2.50 dB  
 SFO2 250.1310005 MHz  
 SI 32768  
 SF 62.8952692 MHz  
 WDW EM  
 SSB 0  
 LB 1.00 Hz  
 GB 0  
 PC 1.40

## 1-(4-Methoxybenzyl)-6-nitro-2-p-tolylquinolin-4(1H)-one (7ab).

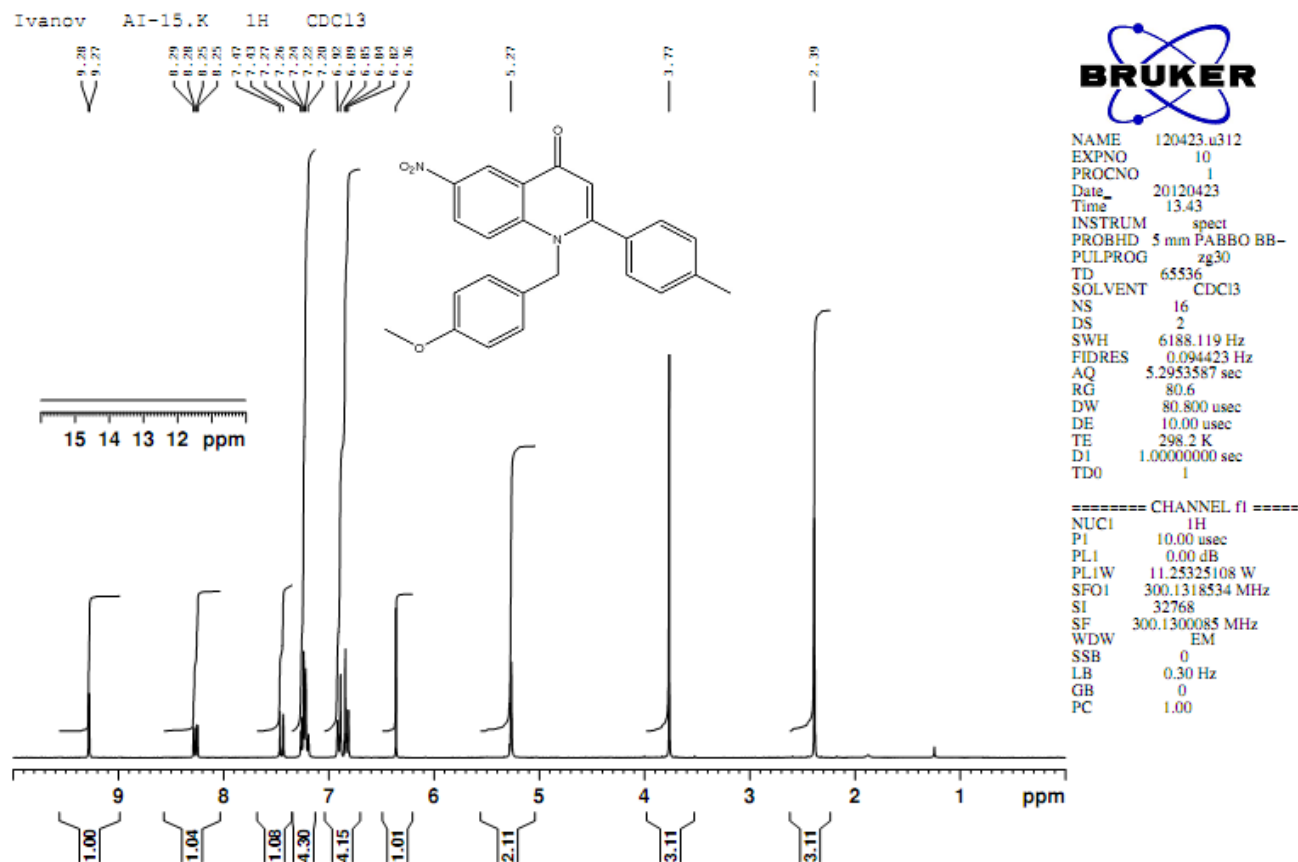



## 1-(4-methoxybenzyl)-6-nitro-2-p-tolylquinolin-4(1H)-one (7ab).

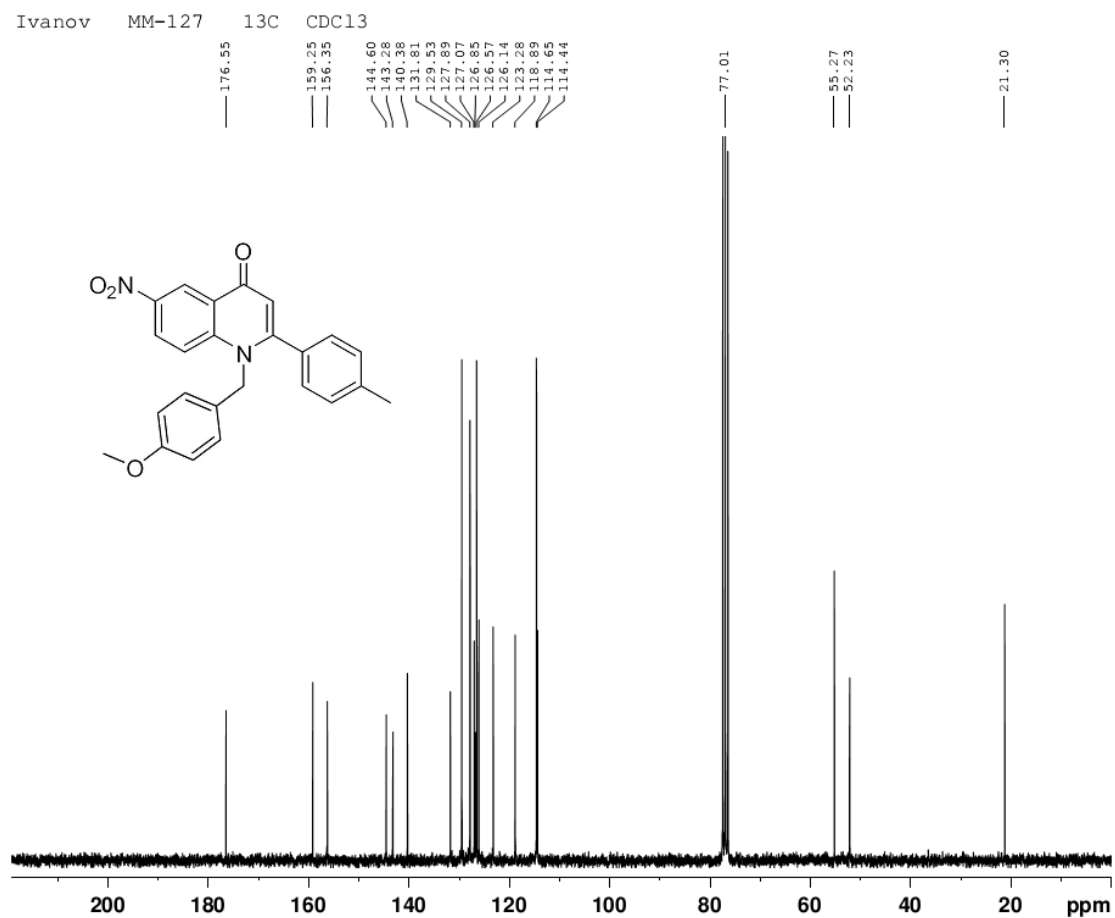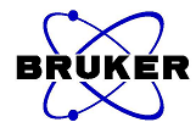

NAME 120424.202  
 EXPNO 12  
 PROCNO 1  
 Date\_ 20120424  
 Time 11.47  
 INSTRUM spect  
 PROBHD 5 mm PABBO BB-  
 PULPROG zgpg30  
 TD 65536  
 SOLVENT CDC13  
 NS 1024  
 DS 4  
 SWH 15000.000 Hz  
 FIDRES 0.228882 Hz  
 AQ 2.1845834 sec  
 RG 1440  
 DW 33.333 usec  
 DE 10.00 usec  
 TE 299.7 K  
 D1 2.00000000 sec  
 d11 0.03000000 sec  
 DELTA 1.89999998 sec  
 TD0 1

==== CHANNEL f1 ====  
 NUC1 13C  
 P1 10.00 usec  
 PL1 -1.00 dB  
 SFO1 62.9015280 MHz

==== CHANNEL f2 ====  
 CPDPRG2 waltz16  
 NUC2 1H  
 PCPD2 70.00 usec  
 PL12 15.00 dB  
 PL13 15.00 dB  
 PL2 -2.50 dB  
 SFO2 250.1310005 MHz  
 SI 32768  
 SF 62.8952402 MHz  
 WDW EM  
 SSB 0  
 LB 1.00 Hz  
 GB 0  
 PC 1.40

**(R)-6-Nitro-1-(1-phenylethyl)-2-p-tolylquinolin-4(1H)-one (7ac).**

Miliutina Mariia, MM-118, 1H, DMSO

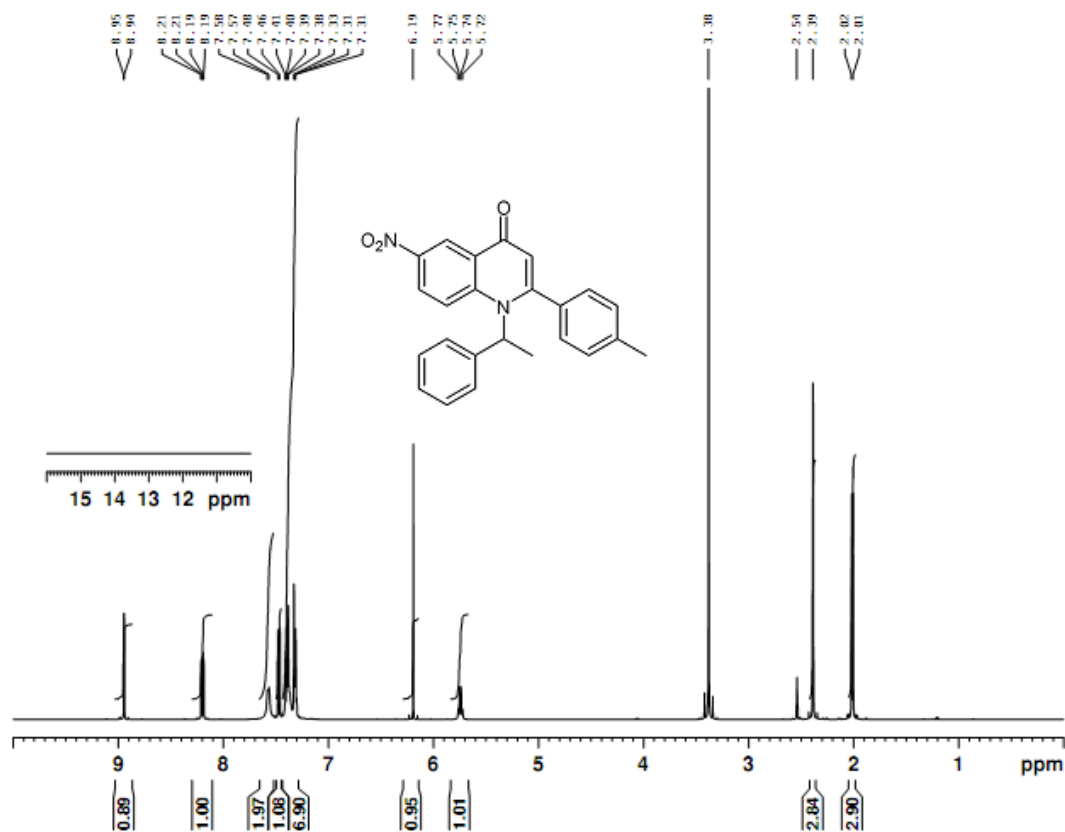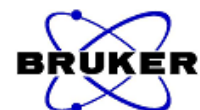

NAME 120201.501  
 EXPNO 10  
 PROCNO 1  
 Date\_ 20120201  
 Time 9.12  
 INSTRUM spect  
 PROBHD 5 mm PABBO BB-  
 PULPROG zg30  
 TD 65536  
 SOLVENT DMSO  
 NS 16  
 DS 2  
 SWH 10330.578 Hz  
 FIDRES 0.157632 Hz  
 AQ 3.1720407 sec  
 RG 114  
 DW 48.400 usec  
 DE 6.50 usec  
 TE 300.0 K  
 D1 1.0000000 sec  
 TD0 1

===== CHANNEL f1 =====  
 NUC1 1H  
 P1 9.80 usec  
 PL1 -3.00 dB  
 SFO1 500.1330885 MHz  
 SI 32768  
 SF 500.1299838 MHz  
 WDW EM  
 SSB 0  
 LB 0.30 Hz  
 GB 0  
 PC 1.00

**(R)-6-Nitro-1-(1-phenylethyl)-2-p-tolylquinolin-4(1H)-one (7ac).**Miliutina Mariia, MM-118, <sup>13</sup>C, DMSO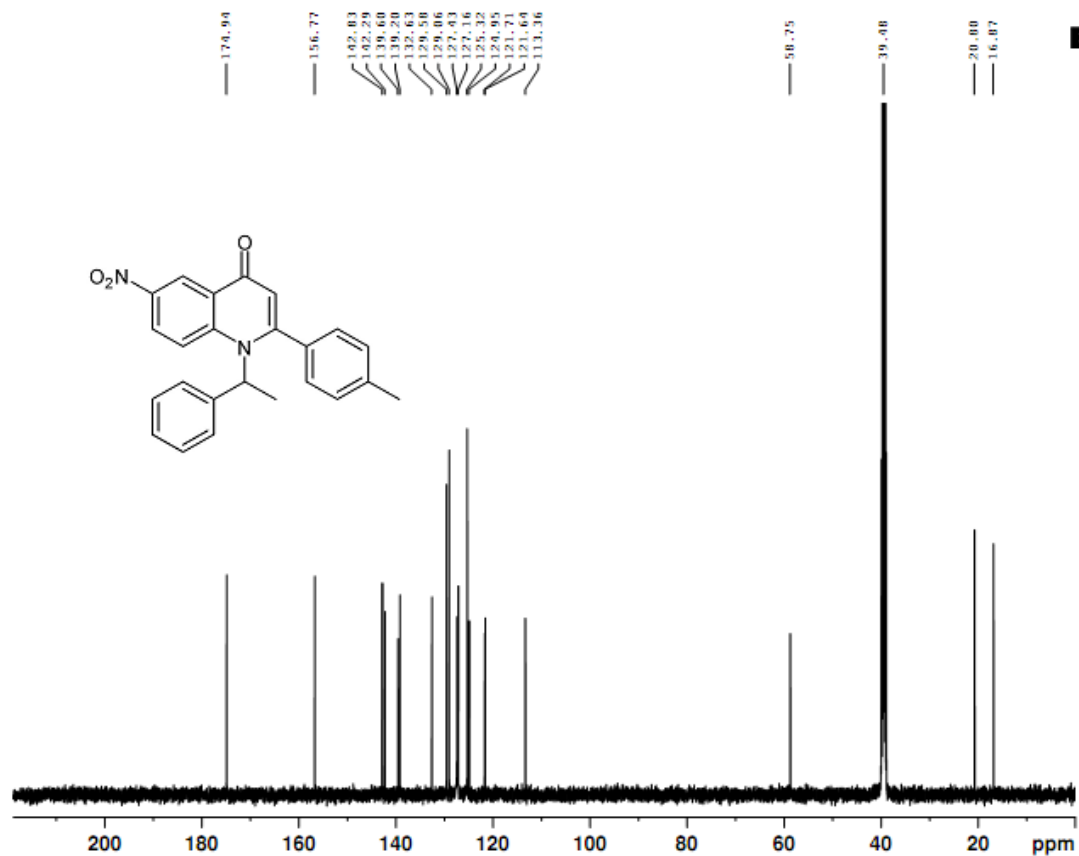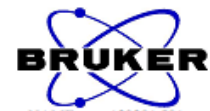

NAME 120201.501  
 EXPNO 13  
 PROCNO 1  
 Date\_ 20120201  
 Time 10.54  
 INSTRUM spect  
 PROBHD 5 mm PABBO BB-  
 PULPROG zgpg30  
 TD 65536  
 SOLVENT DMSO  
 NS 512  
 DS 4  
 SWH 30030.029 Hz  
 FIDRES 0.458222 Hz  
 AQ 1.0912410 sec  
 RG 1149.4  
 DW 16.650 usec  
 DE 6.50 usec  
 TE 300.0 K  
 D1 2.0000000 sec  
 D11 0.03000000 sec  
 TD0 1

===== CHANNEL f1 =====  
 NUC1 <sup>13</sup>C  
 P1 9.00 usec  
 PL1 4.50 dB  
 SFO1 125.7703643 MHz

===== CHANNEL f2 =====  
 CPDPRG2 waltz16  
 NUC2 <sup>1</sup>H  
 PCPD2 70.00 usec  
 PL2 -3.00 dB  
 PL12 14.08 dB  
 PL13 120.00 dB  
 SFO2 500.1320005 MHz  
 S1 32768  
 SF 125.7578541 MHz  
 WDW EM  
 SSB 0  
 LB 1.00 Hz  
 GB 0  
 PC 1.40

1-Heptyl-6-nitro-2-*p*-tolylquinolin-4(1*H*)-one (7ad).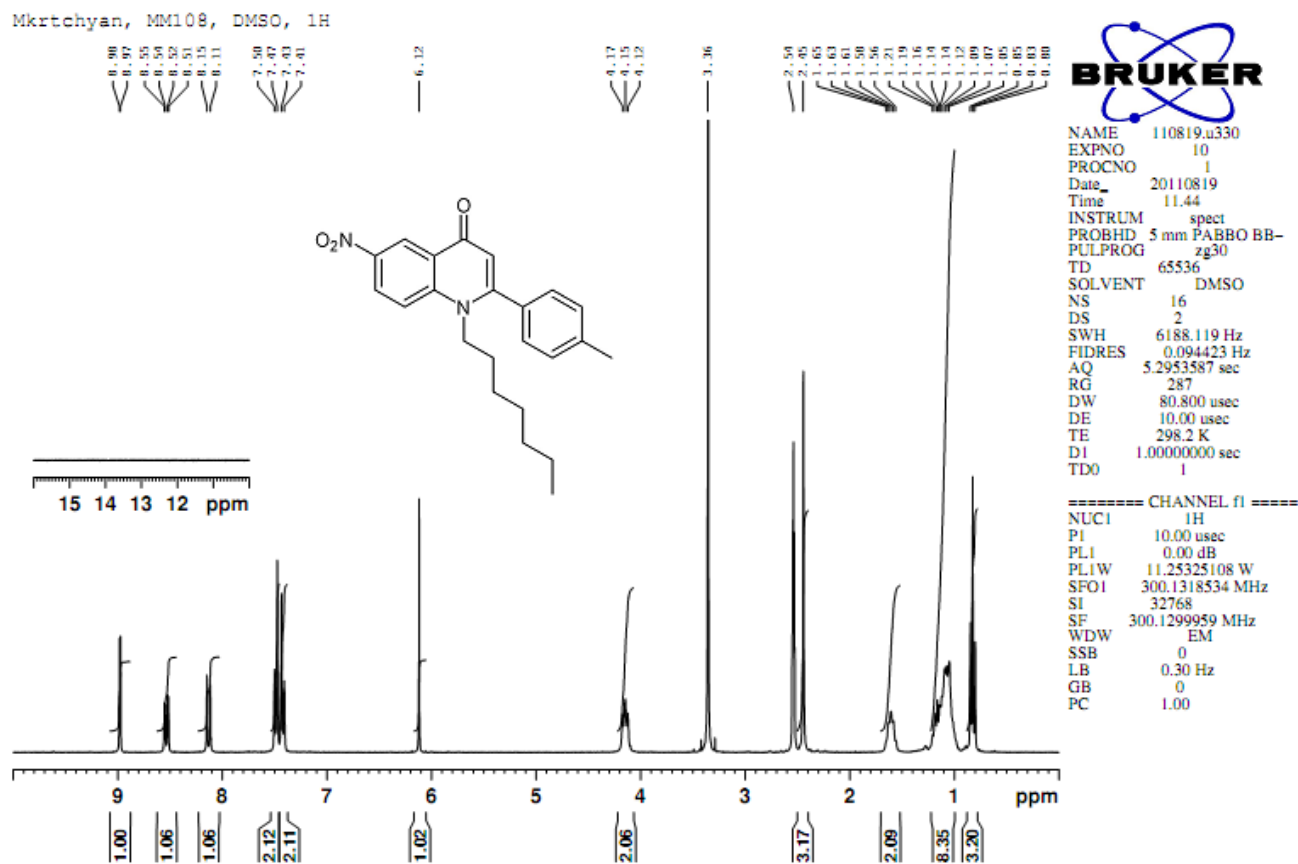

1-Heptyl-6-nitro-2-*p*-tolylquinolin-4(1*H*)-one (7ad).

Mkrtchyan, MM-108, DMSO, 13C

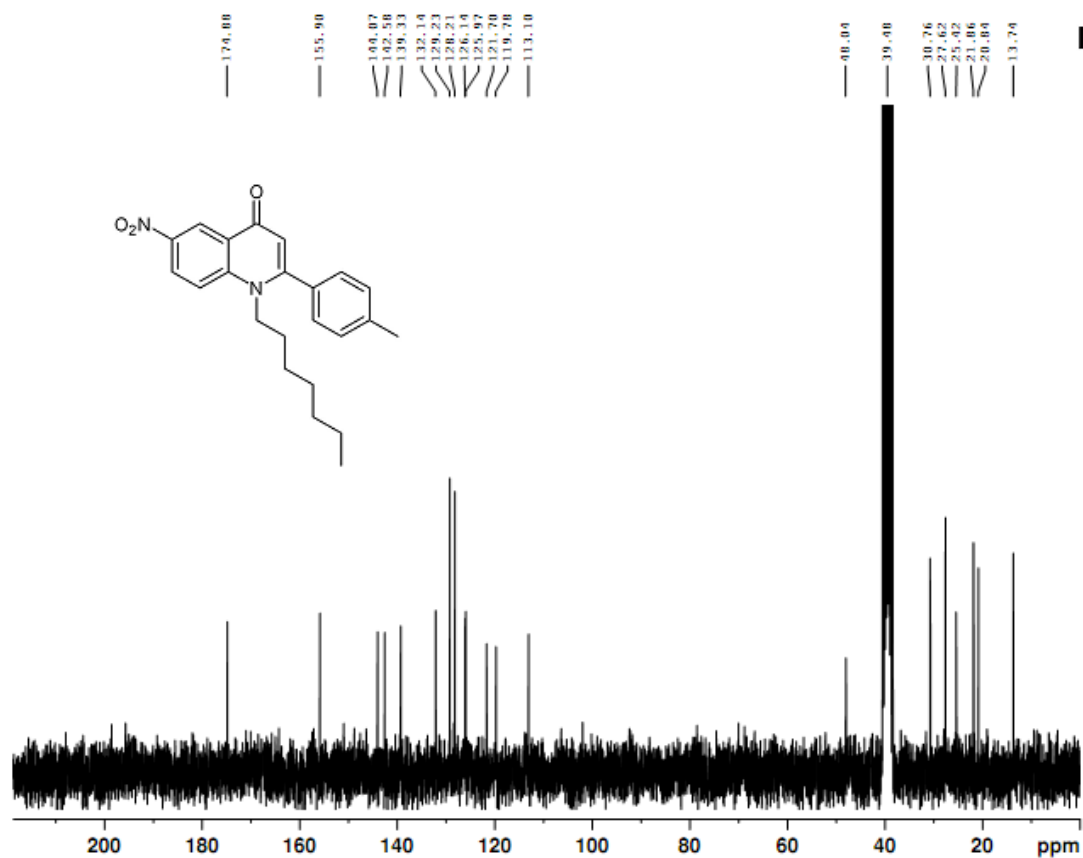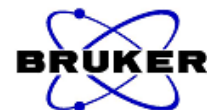

NAME 110819.216  
 EXPNO 10  
 PROCNO 1  
 Date\_ 20110821  
 Time 11.58  
 INSTRUM spect  
 PROBHD 5 mm PABBO BB-  
 PULPROG zgpg30  
 TD 65536  
 SOLVENT DMSO  
 NS 1024  
 DS 4  
 SWH 15000.000 Hz  
 FIDRES 0.228882 Hz  
 AQ 2.1845834 sec  
 RG 2050  
 DW 33.333 usec  
 DE 10.00 usec  
 TE 298.0 K  
 D1 2.0000000 sec  
 d11 0.0300000 sec  
 DELTA 1.89999998 sec  
 TD0 1

===== CHANNEL f1 =====  
 NUC1 13C  
 P1 10.00 usec  
 PL1 -1.00 dB  
 SFO1 62.9015280 MHz

===== CHANNEL f2 =====  
 CPDPRG2 waltz16  
 NUC2 1H  
 PCPD2 70.00 usec  
 PL12 15.00 dB  
 PL13 15.00 dB  
 PL2 -2.50 dB  
 SFO2 250.1310005 MHz  
 SF 32768  
 SF 62.8952704 MHz  
 WDW EM  
 SSB 0  
 LB 1.00 Hz  
 GB 0  
 PC 1.40

## 1-Hexyl-6-nitro-2-p-tolylquinolin-4(1H)-one (7ae).

Miliutina MM-107 1H CDC13/ DMSO(6:1)

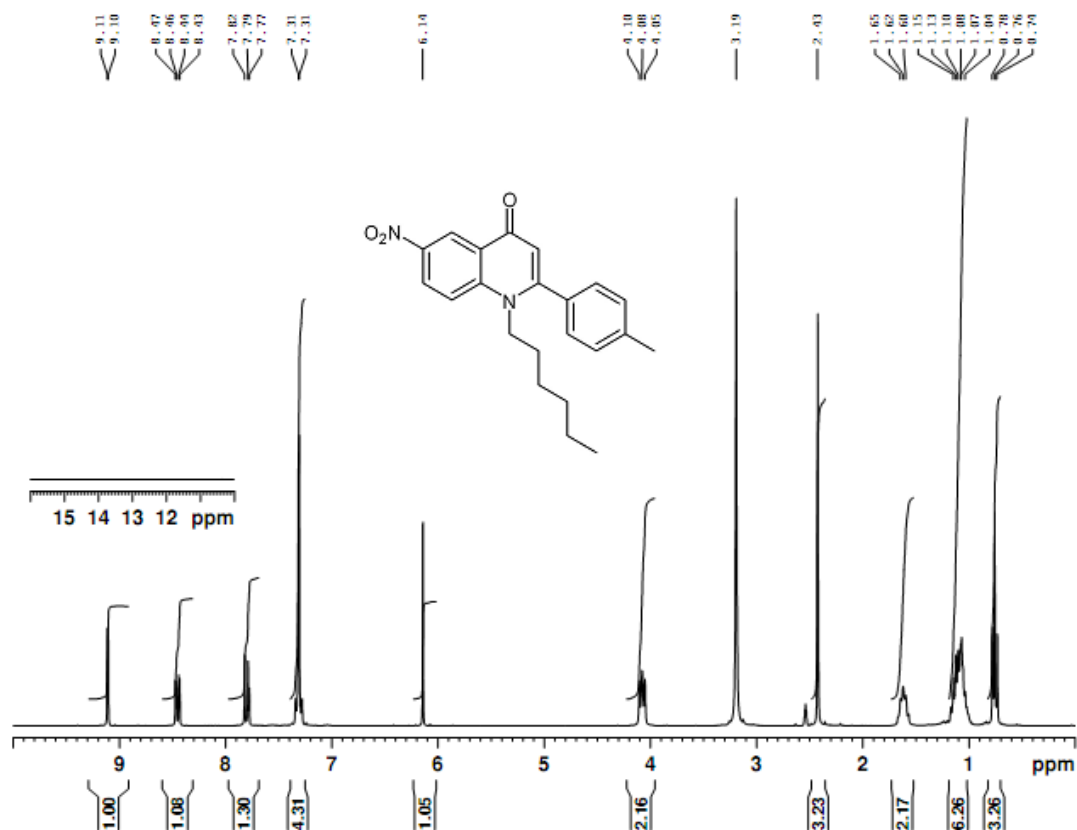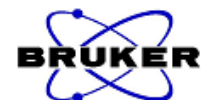

NAME 120131\_u302  
 EXPNO 10  
 PROCNO 1  
 Date\_ 20120131  
 Time 7.49  
 INSTRUM spect  
 PROBHD 5 mm PABBO BB-  
 PULPROG zg30  
 TD 65536  
 SOLVENT CDCl3  
 NS 32  
 DS 2  
 SWH 9014.423 Hz  
 FIDRES 0.137549 Hz  
 AQ 3.6351135 sec  
 RG 128  
 DW 55.467 usec  
 DE 10.00 usec  
 TE 298.2 K  
 D1 1.0000000 sec  
 TDO 1

===== CHANNEL f1 =====  
 NUC1 1H  
 P1 10.00 usec  
 PL1 0.00 dB  
 PL1W 11.25325108 W  
 SFO1 300.1318534 MHz  
 SI 32768  
 SF 300.1314194 MHz  
 WDW EM  
 SSB 0  
 LB 0.30 Hz  
 GB 0  
 PC 1.00

## 1-Hexyl-6-nitro-2-p-tolylquinolin-4(1H)-one (7ae).

Mkrtchyan, MM-107, DMSO, 13C

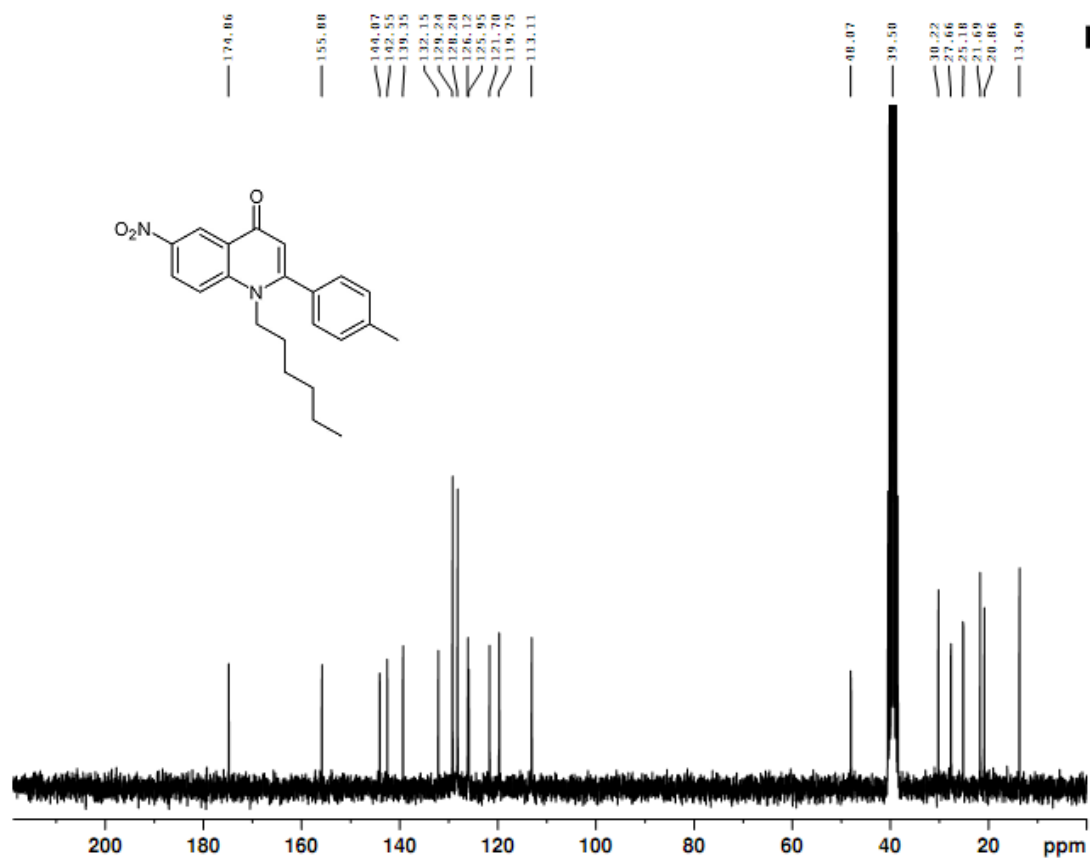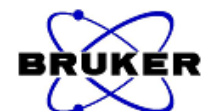

NAME 110819.215  
 EXPNO 10  
 PROCNO 1  
 Date\_ 20110821  
 Time 10.20  
 INSTRUM spect  
 PROBHD 5 mm PABBO BB-  
 PULPROG zgpg30  
 TD 65536  
 SOLVENT DMSO  
 NS 1024  
 DS 4  
 SWH 15000.000 Hz  
 FIDRES 0.228882 Hz  
 AQ 2.1845834 sec  
 RG 2050  
 DW 33.333 usec  
 DE 10.00 usec  
 TE 298.0 K  
 D1 2.0000000 sec  
 d11 0.0300000 sec  
 DELTA 1.89999998 sec  
 TD0 1

===== CHANNEL f1 =====  
 NUC1 13C  
 P1 10.00 usec  
 PL1 -1.00 dB  
 SFO1 62.9015280 MHz

===== CHANNEL f2 =====  
 CPDPRG2 waltz16  
 NUC2 1H  
 PCPD2 70.00 usec  
 PL12 15.00 dB  
 PL13 15.00 dB  
 PL2 -2.50 dB  
 SFO2 250.1310005 MHz  
 SI 32768  
 SF 62.8952691 MHz  
 WDW EM  
 SSB 0  
 LB 1.00 Hz  
 GB 0  
 PC 1.40

6-Nitro-1-cyclohexyl-2-*p*-tolyl-4-quinolone (7af).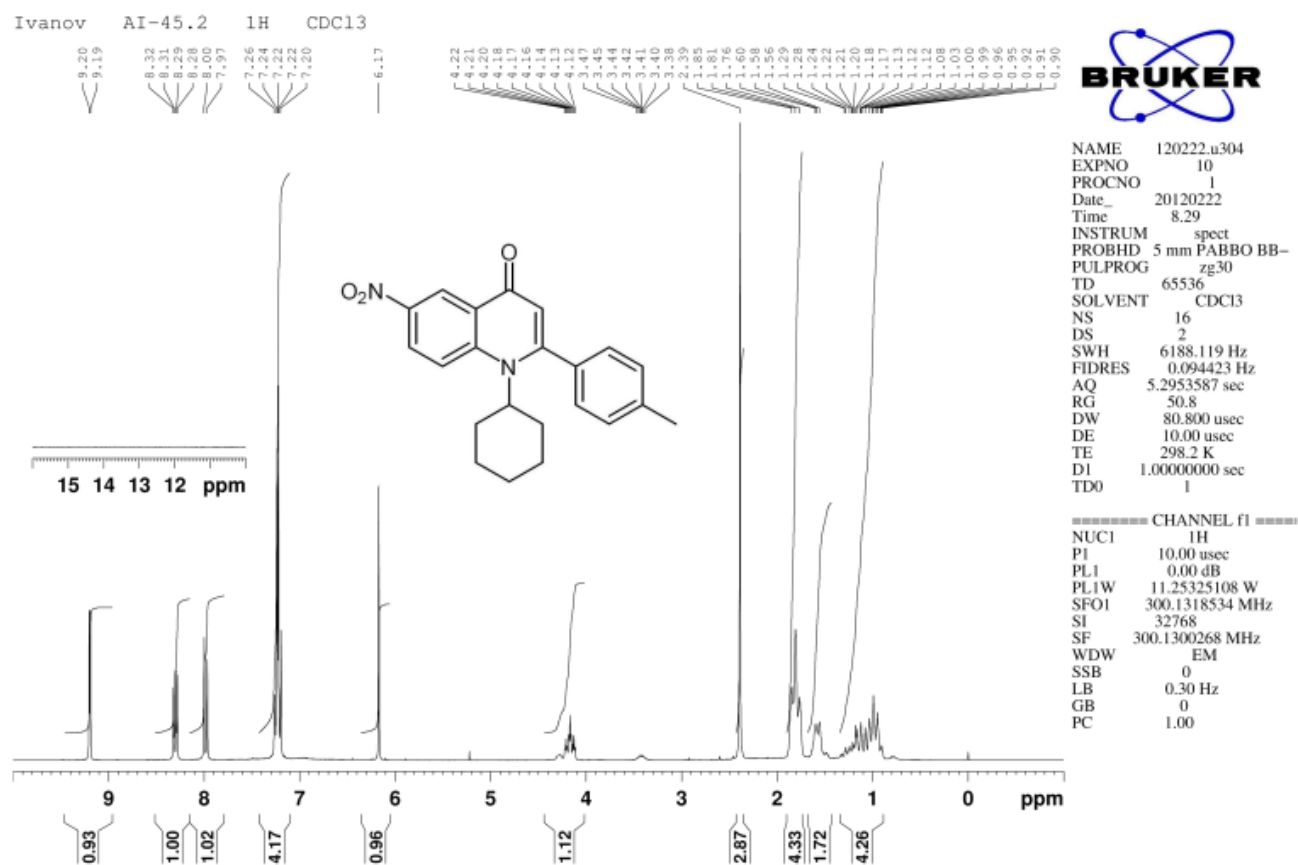



6-Nitro-1-cyclohexyl-2-*p*-tolyl-4-quinolone (7af).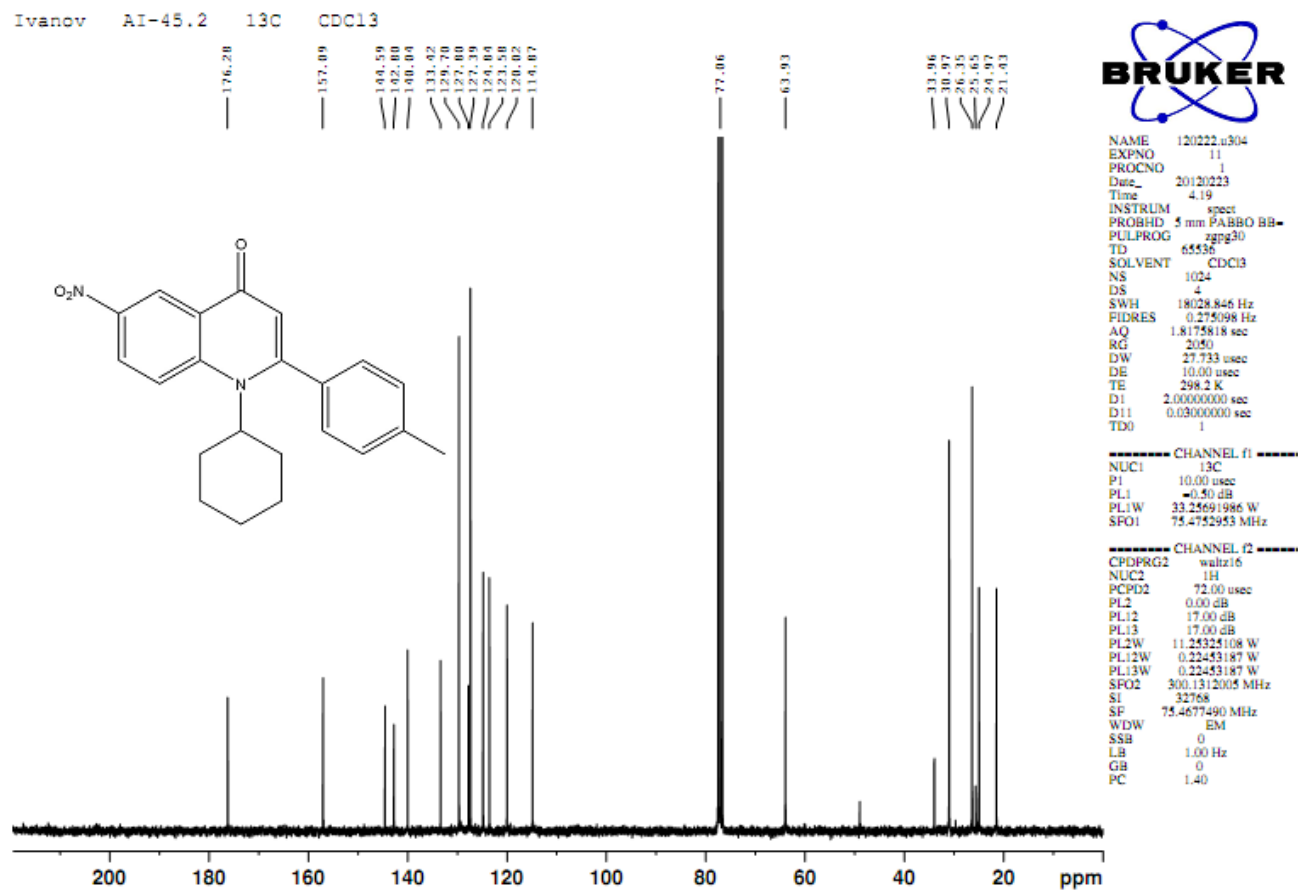

6-Nitro-1-pentyl-2-*p*-tolylquinolin-4(1*H*)-one (7ag).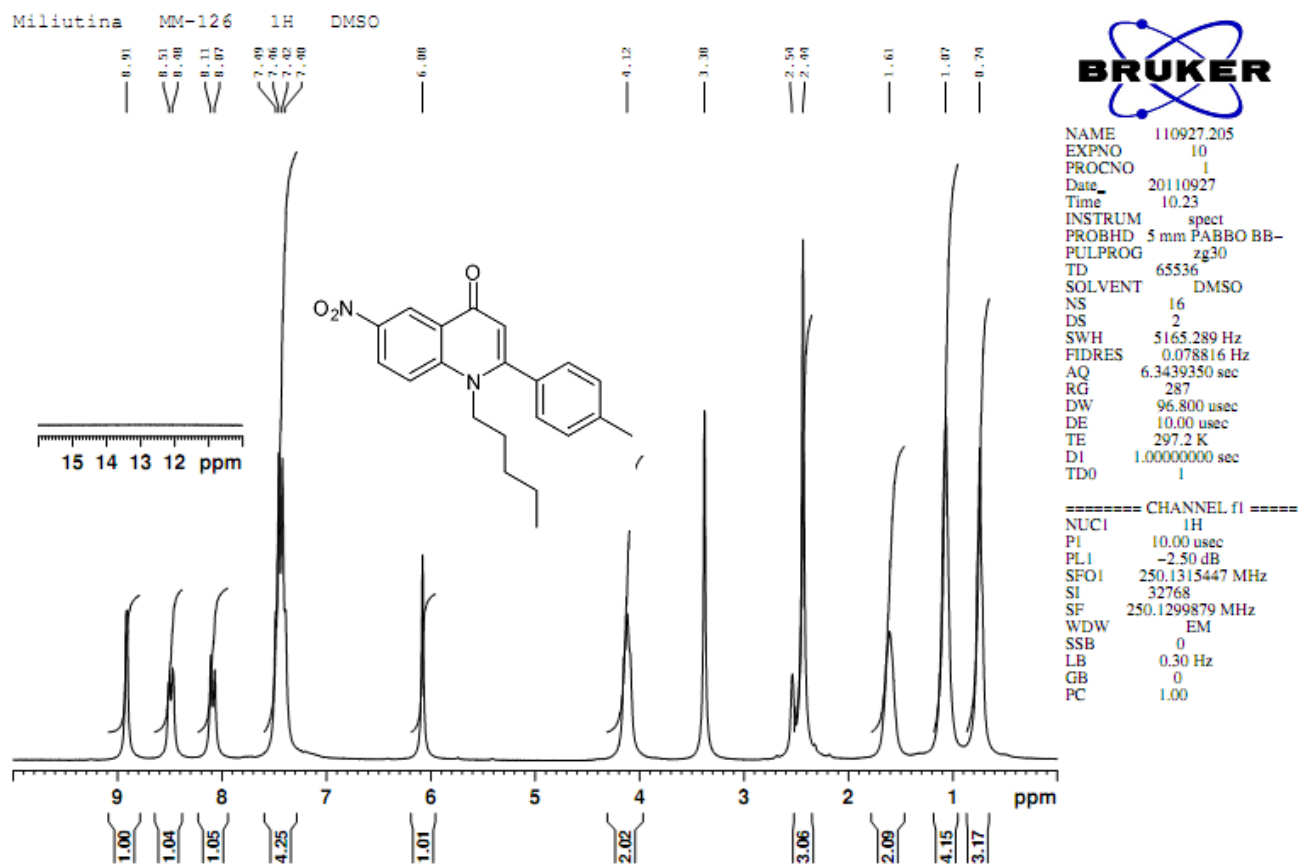

6-Nitro-1-pentyl-2-*p*-tolylquinolin-4(1*H*)-one (7ag).

Miliutina MM-126 13C DMSO

179.89  
 155.88  
 144.84  
 142.54  
 139.35  
 132.14  
 129.23  
 128.17  
 126.11  
 125.94  
 121.68  
 119.74  
 113.12

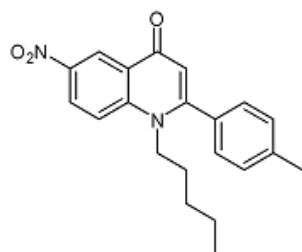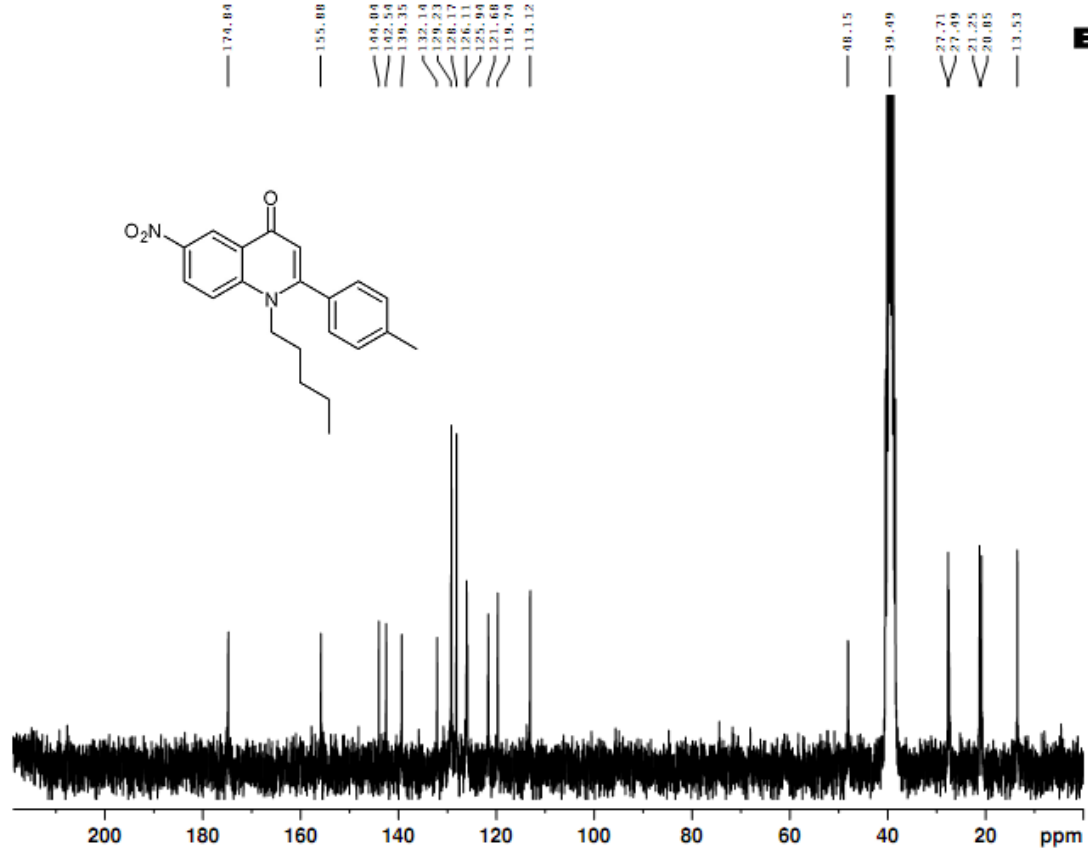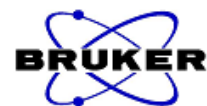

NAME 110927.205  
 EXPNO 11  
 PROCNO 1  
 Date\_ 20110927  
 Time 21.09  
 INSTRUM spect  
 PROBHD 5 mm PABBO BB-  
 PULPROG zgpg30  
 TD 65536  
 SOLVENT DMSO  
 NS 1024  
 DS 4  
 SWH 15000.000 Hz  
 FIDRES 0.228882 Hz  
 AQ 2.1845834 sec  
 RG 2050  
 DW 33.333 usec  
 DE 10.00 usec  
 TE 298.3 K  
 D1 2.0000000 sec  
 d11 0.0300000 sec  
 DELTA 1.89999998 sec  
 TDO 1

===== CHANNEL f1 =====  
 NUC1 13C  
 P1 10.00 usec  
 PL1 -1.00 dB  
 SFO1 62.9015280 MHz

===== CHANNEL f2 =====  
 CPDPRG2 waltz16  
 NUC2 1H  
 PCPD2 70.00 usec  
 PL12 15.00 dB  
 PL13 15.00 dB  
 PL2 -2.50 dB  
 SFO2 250.1310005 MHz  
 SI 32768  
 SF 62.8952697 MHz  
 WDW EM  
 SSB 0  
 LB 1.00 Hz  
 GB 0  
 PC 1.40

1-*n*-Butyl-6-nitro-2-*p*-tolyl-4-quinolone (7ah).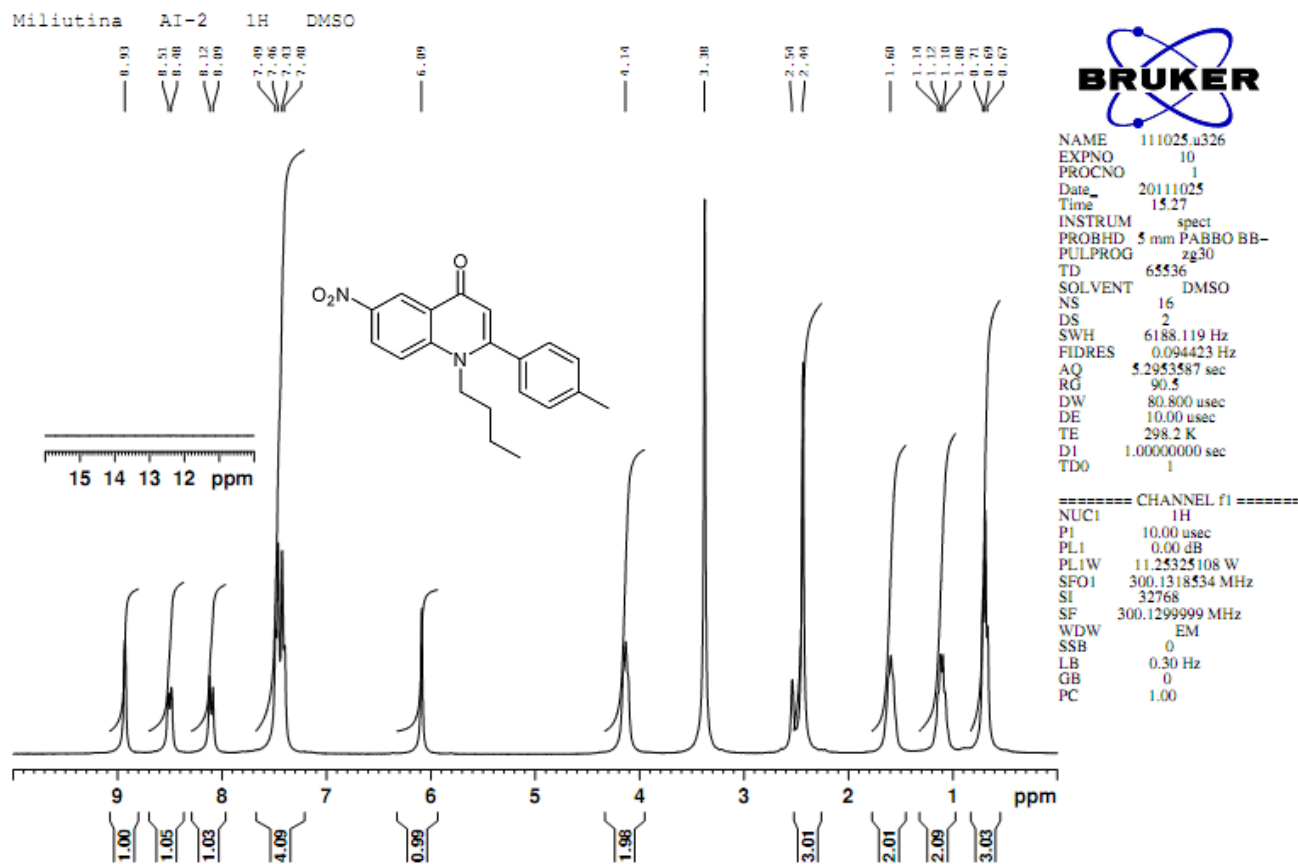

1-*n*-Butyl-6-nitro-2-*p*-tolyl-4-quinolone (7ah).

Miliutina AI-2 13C DMSO

174.06  
 155.91  
 144.07  
 142.53  
 139.38  
 132.17  
 129.27  
 128.21  
 126.09  
 125.96  
 121.69  
 119.76  
 113.15

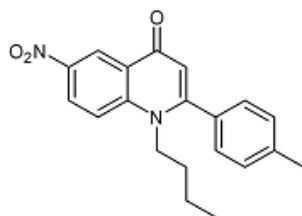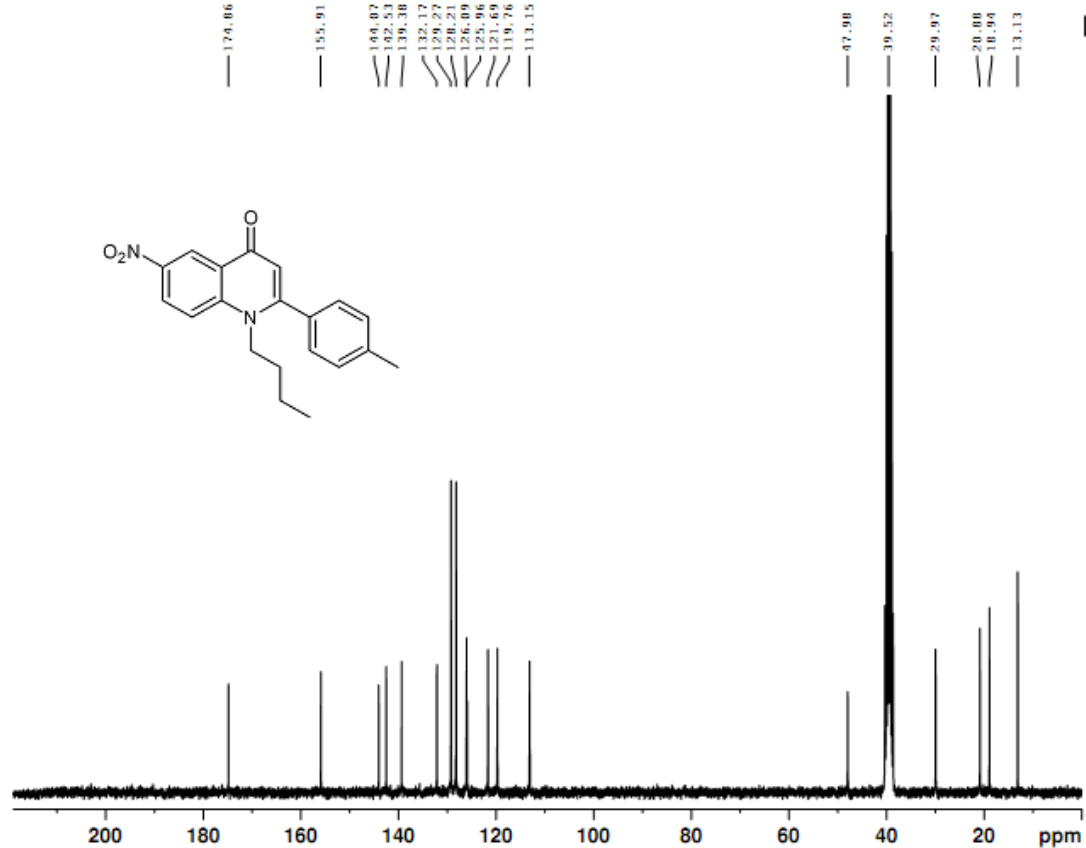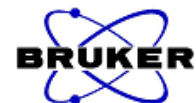

NAME 111025.u326  
 EXPNO 11  
 PROCNO 1  
 Date\_ 20111025  
 Time 16.35  
 INSTRUM spect  
 PROBHD 5 mm PABBO BB-  
 PULPROG zgpg30  
 TD 65536  
 SOLVENT DMSO  
 NS 1024  
 DS 4  
 SWH 18028.846 Hz  
 FIDRES 0.275098 Hz  
 AQ 1.8175818 sec  
 RG 2050  
 DW 27.733 usec  
 DE 10.00 usec  
 TE 298.2 K  
 D1 2.0000000 sec  
 D11 0.0300000 sec  
 TDO 1

===== CHANNEL f1 =====  
 NUC1 13C  
 P1 10.00 usec  
 PL1 -0.50 dB  
 PL1W 33.25691986 W  
 SFO1 75.4752953 MHz

===== CHANNEL f2 =====  
 CPDPRG2 waltz16  
 NUC2 1H  
 PCPD2 72.00 usec  
 PL2 0.00 dB  
 PL12 17.00 dB  
 PL13 17.00 dB  
 PL2W 11.25325108 W  
 PL12W 0.22453187 W  
 PL13W 0.22453187 W  
 SFO2 300.1312005 MHz  
 S1 32768  
 SF 75.4677867 MHz  
 WDW EM  
 SSB 0  
 LB 1.00 Hz  
 GB 0  
 PC 1.40

6-Nitro-1-*n*-propyl-2-*p*-tolyl-4-quinolone (7ai).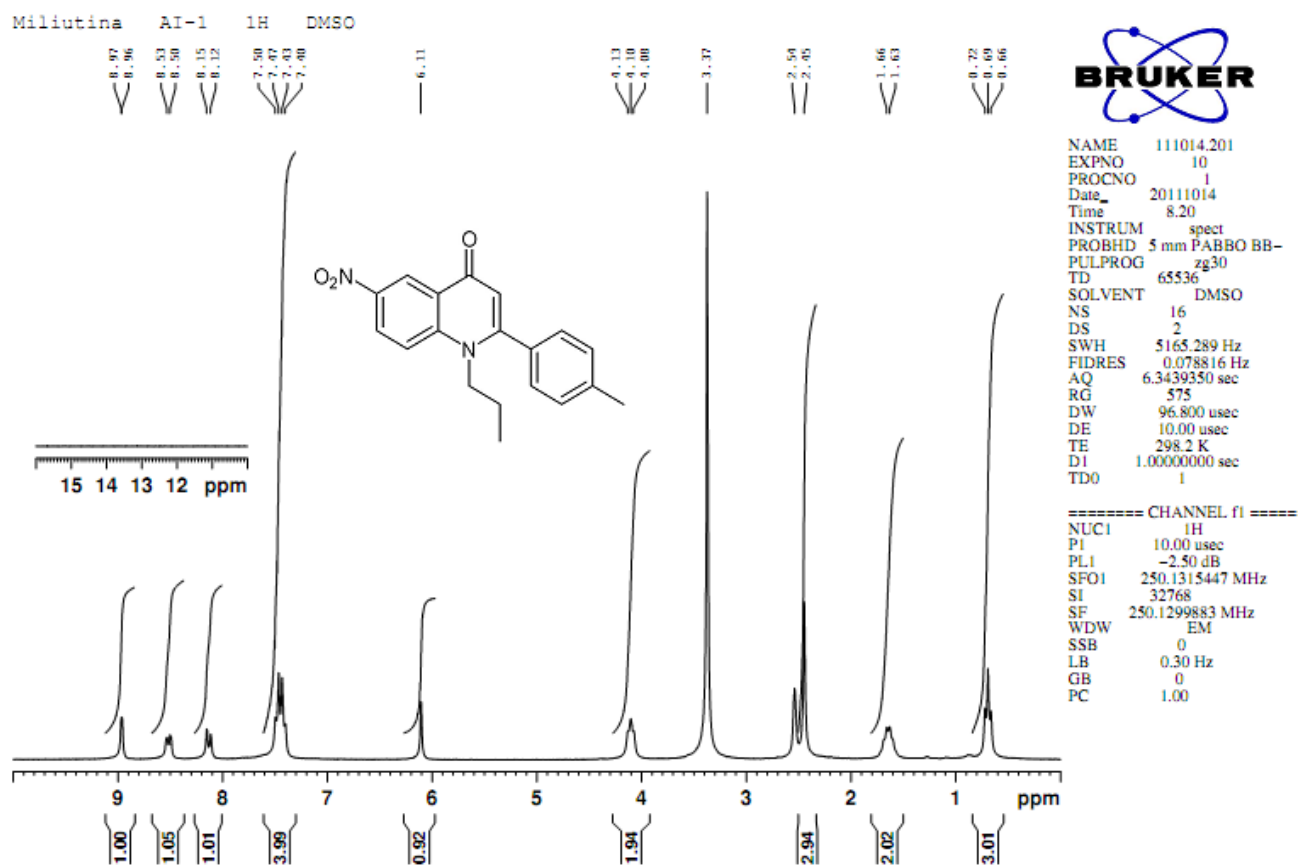

6-Nitro-1-*n*-propyl-2-*p*-tolyl-4-quinolone (7ai).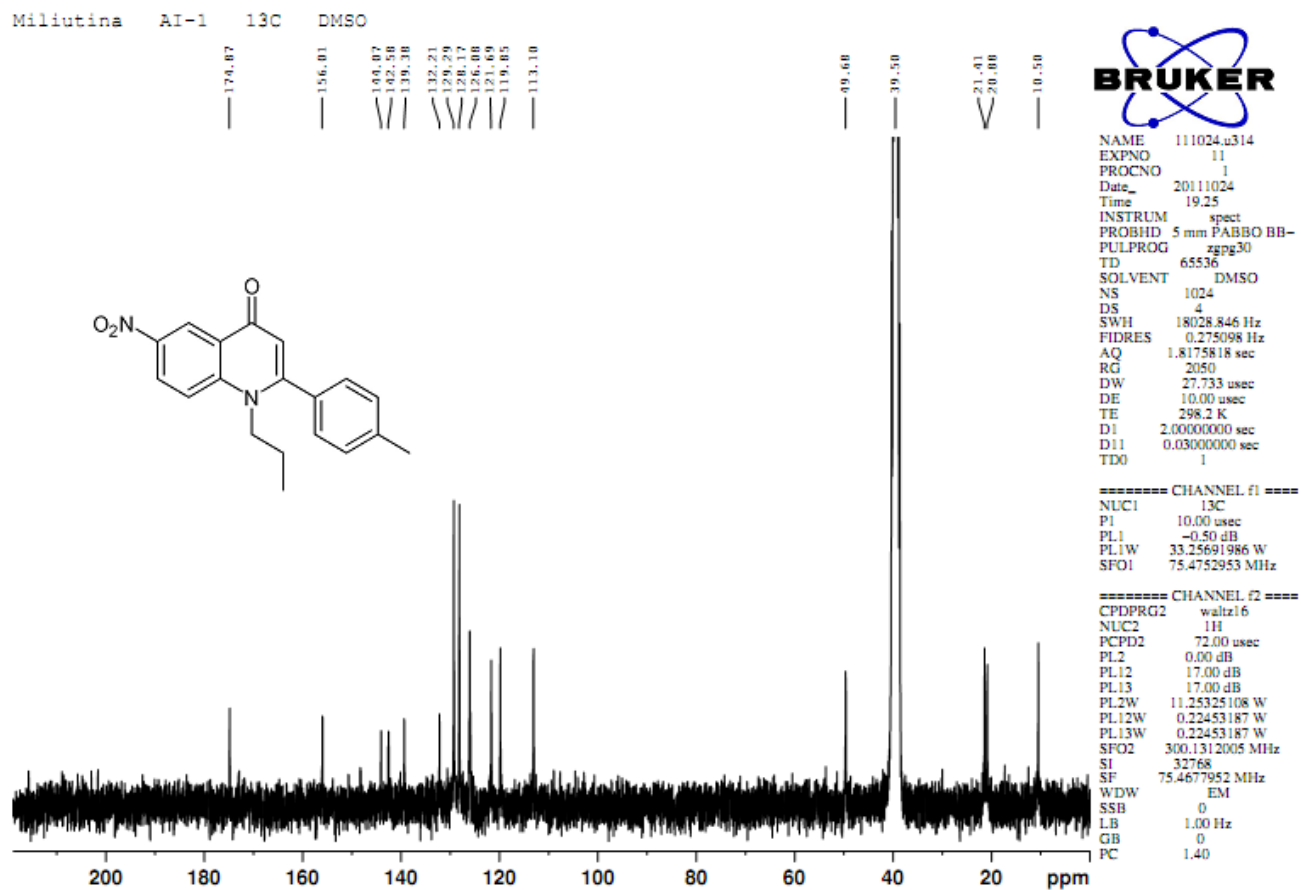

1-*iso*-Propyl-6-nitro-2-*p*-tolyl-4-quinolone (7aj).

Ivanov AI-7.1 1H CDCl3

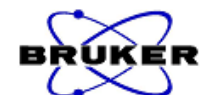

NAME 111121.u340  
 EXPNO 10  
 PROCNO 1  
 Date\_ 20111121  
 Time 16.04  
 INSTRUM spect  
 PROBHD 5 mm PABBO BB-  
 PULPROG zg30  
 TD 65536  
 SOLVENT CDCl3  
 NS 16  
 DS 2  
 SWH 6188.119 Hz  
 FIDRES 0.094423 Hz  
 AQ 5.2953587 sec  
 RG 114  
 DW 80.800 usec  
 DE 10.00 usec  
 TE 298.2 K  
 D1 1.0000000 sec  
 TD0 1

===== CHANNEL f1 =====  
 NUC1 1H  
 P1 10.00 usec  
 PL1 0.00 dB  
 PL1W 11.25325108 W  
 SFO1 300.1318534 MHz  
 SI 32768  
 SF 300.1300083 MHz  
 WDW EM  
 SSB 0  
 LB 0.30 Hz  
 GB 0  
 PC 1.00

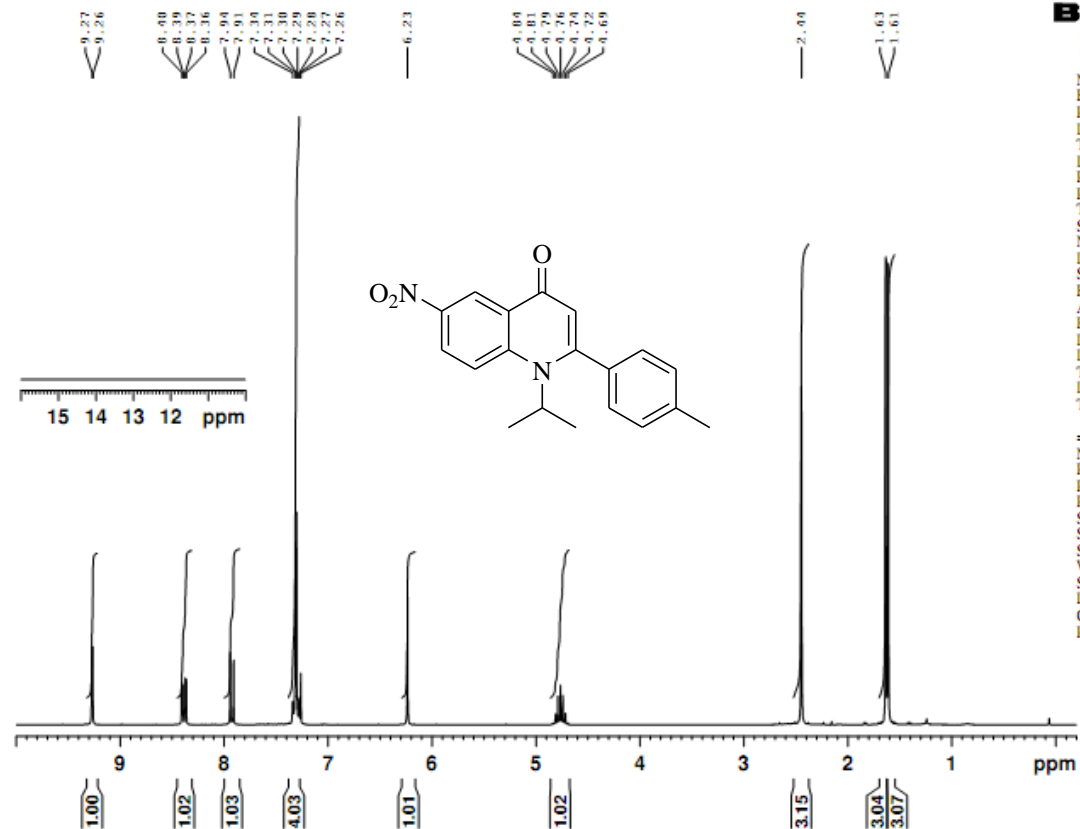



## 1-iso-Propyl-6-nitro-2-p-tolyl-4-quinolone (7aj).

Ivanov AI-7.1 13C CDC13

|        |        |        |        |        |        |        |        |        |        |        |        |        |
|--------|--------|--------|--------|--------|--------|--------|--------|--------|--------|--------|--------|--------|
| 176.12 | 156.92 | 141.76 | 140.93 | 140.14 | 133.17 | 129.80 | 127.76 | 127.50 | 125.07 | 124.69 | 119.67 | 114.55 |
|--------|--------|--------|--------|--------|--------|--------|--------|--------|--------|--------|--------|--------|

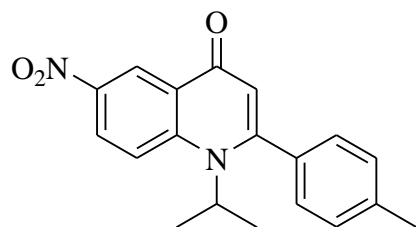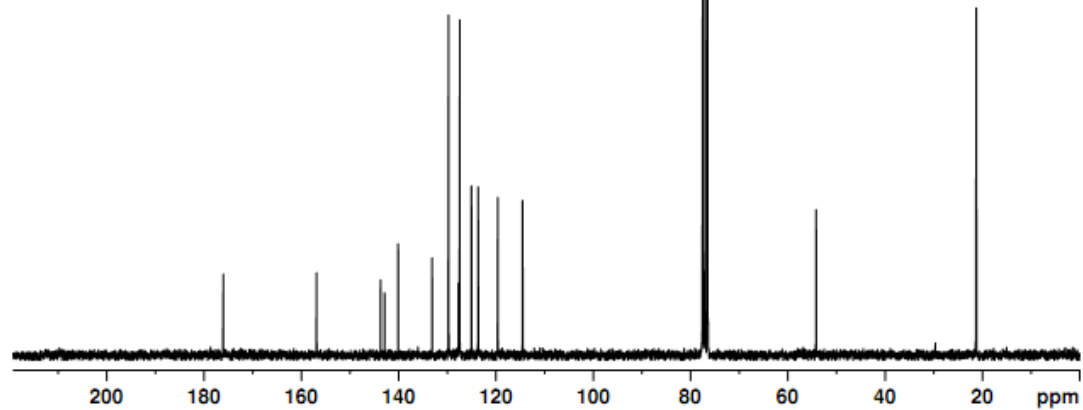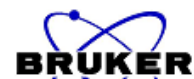

NAME 111129.212  
 EXPNO 10  
 PROCNO 1  
 Date\_ 20111130  
 Time 3.33  
 INSTRUM spect  
 PROBHD 5 mm PABBO BB-  
 PULPROG zgpg30  
 TD 65536  
 SOLVENT CDCl3  
 NS 1024  
 DS 4  
 SWH 15000.000 Hz  
 FIDRES 0.228882 Hz  
 AQ 2.1845834 sec  
 RG 2050  
 DW 33.333 usec  
 DE 10.00 usec  
 TE 297.9 K  
 D1 2.00000000 sec  
 d11 0.03000000 sec  
 DELTA 1.89999998 sec  
 TD0 1

===== CHANNEL f1 =====  
 NUC1 13C  
 P1 10.00 usec  
 PL1 -1.00 dB  
 SFO1 62.9015280 MHz

===== CHANNEL f2 =====  
 CPDPRG2 waltz16  
 NUC2 1H  
 PCPD2 70.00 usec  
 PL12 15.00 dB  
 PL13 15.00 dB  
 PL2 -2.50 dB  
 SFO2 250.1310005 MHz  
 SI 32768  
 SF 62.8952390 MHz  
 WDW EM  
 SSB 0  
 LB 1.00 Hz  
 GB 0  
 PC 1.40

## 6-Nitro-1-phenyl-2-p-tolyl-4-quinolone (7ak).

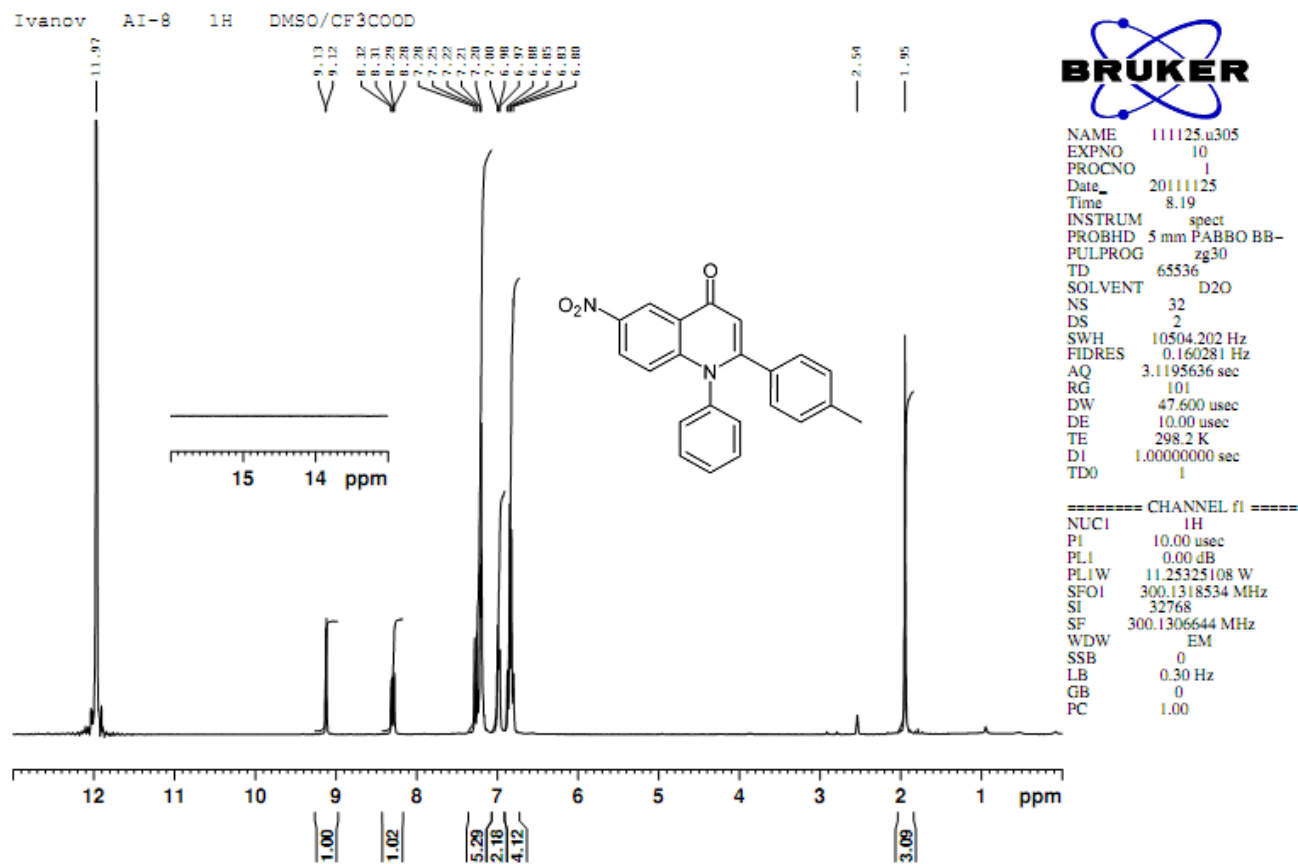

6-Nitro-1-phenyl-2-*p*-tolyl-4-quinolone (7ak).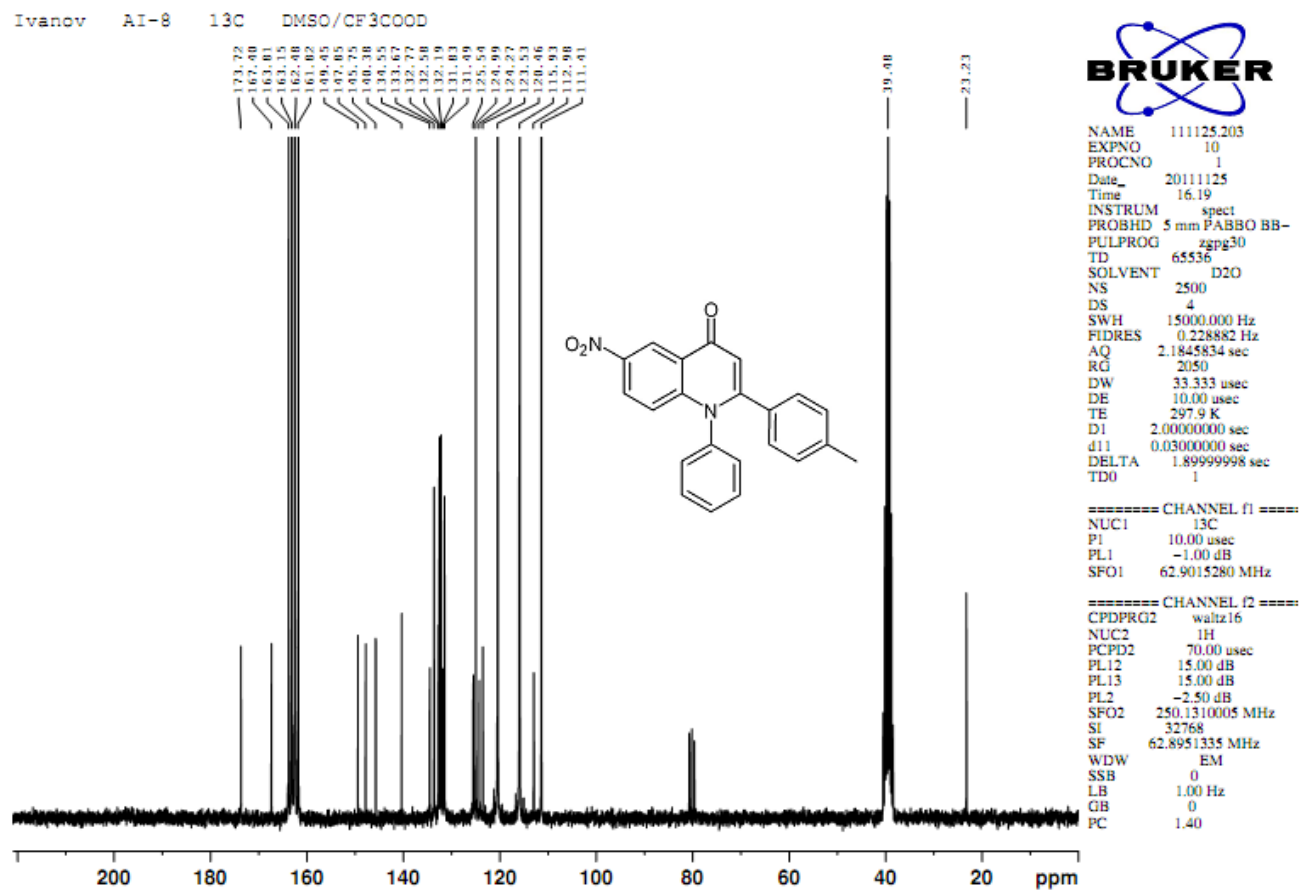

6-Nitro-2-*p*-tolyl-2,4,6-trimethylphenyl-4-quinolone (7a).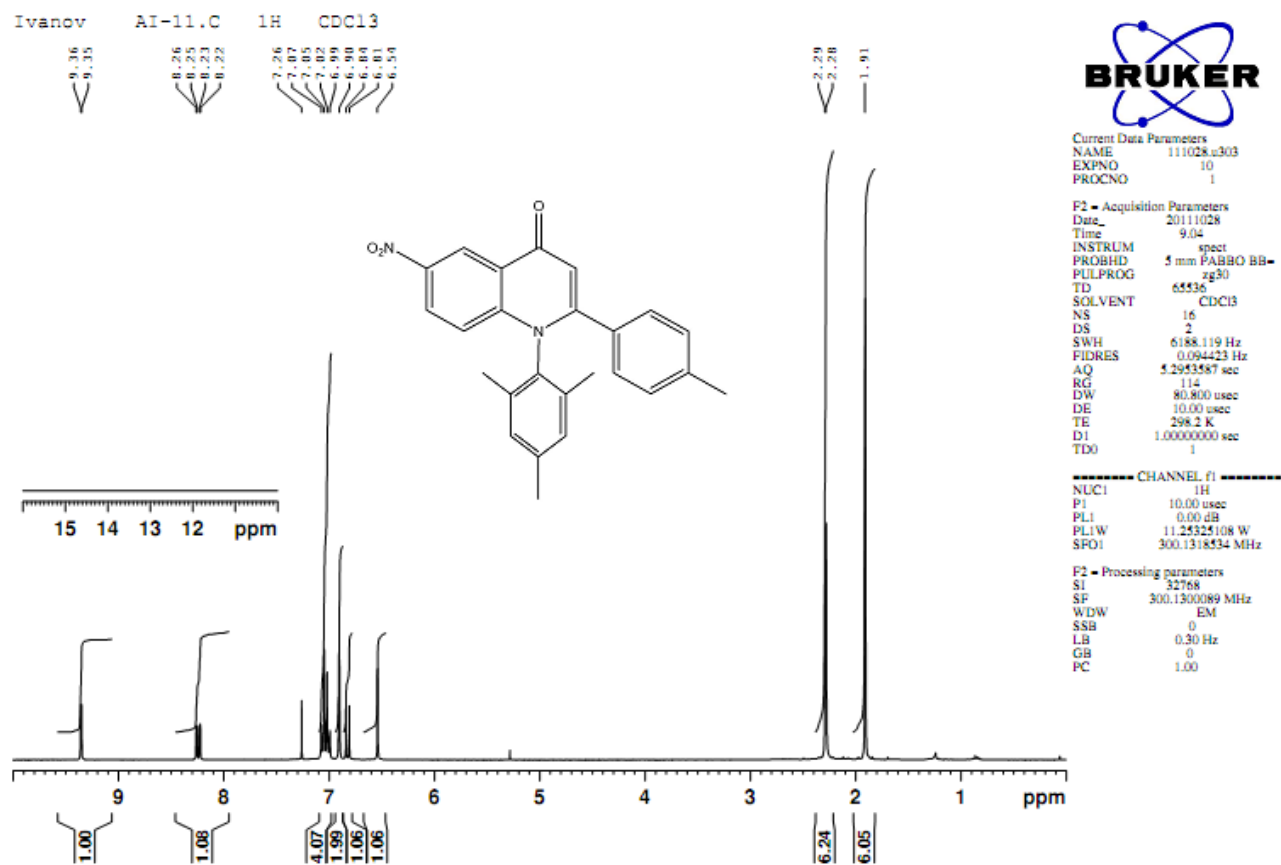

6-Nitro-2-*p*-tolyl-2,4,6-trimethylphenyl-4-quinolone (7a1).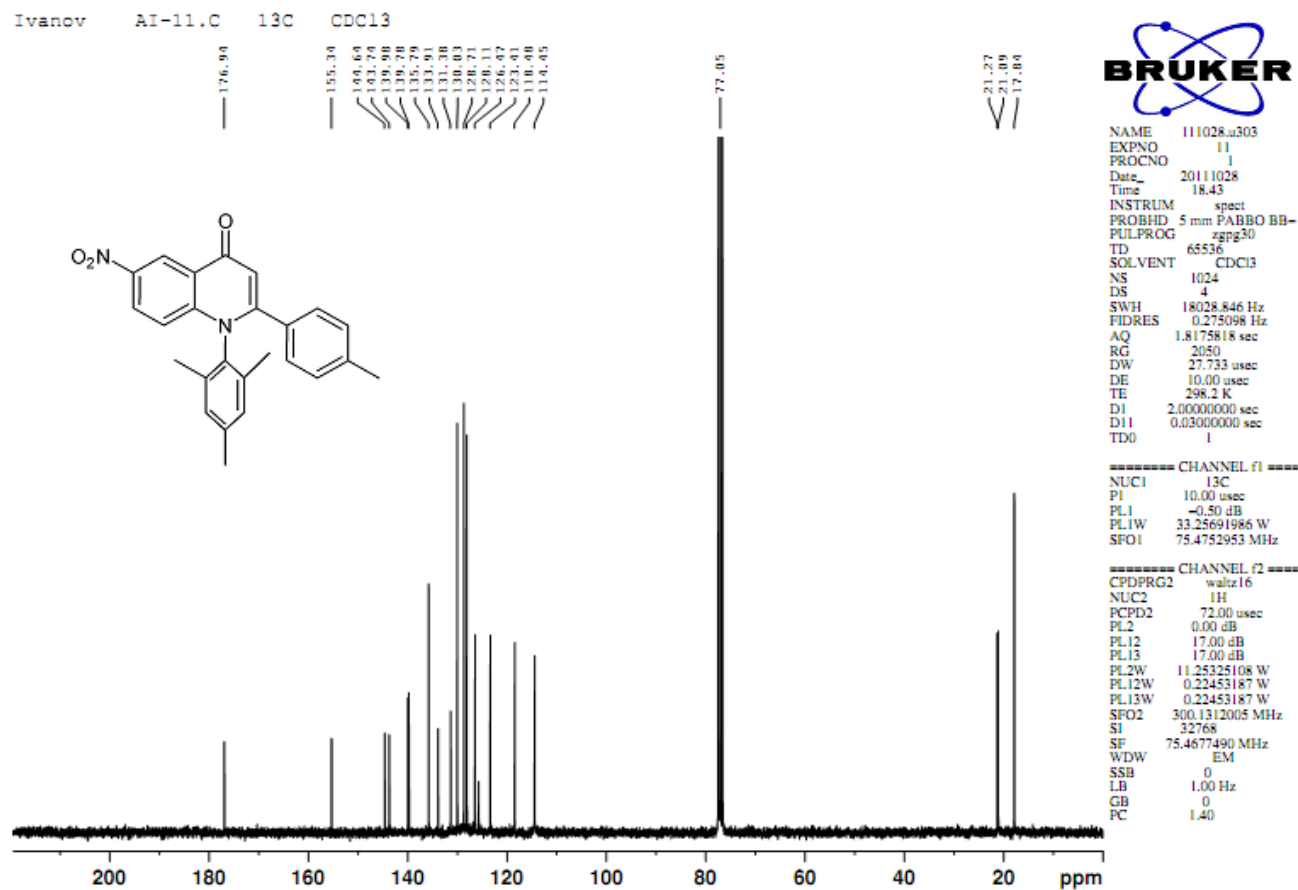

## 1-(3,5-Dimethylphenyl)-6-nitro-2-p-tolylquinolin-4(1H)-one (7am).

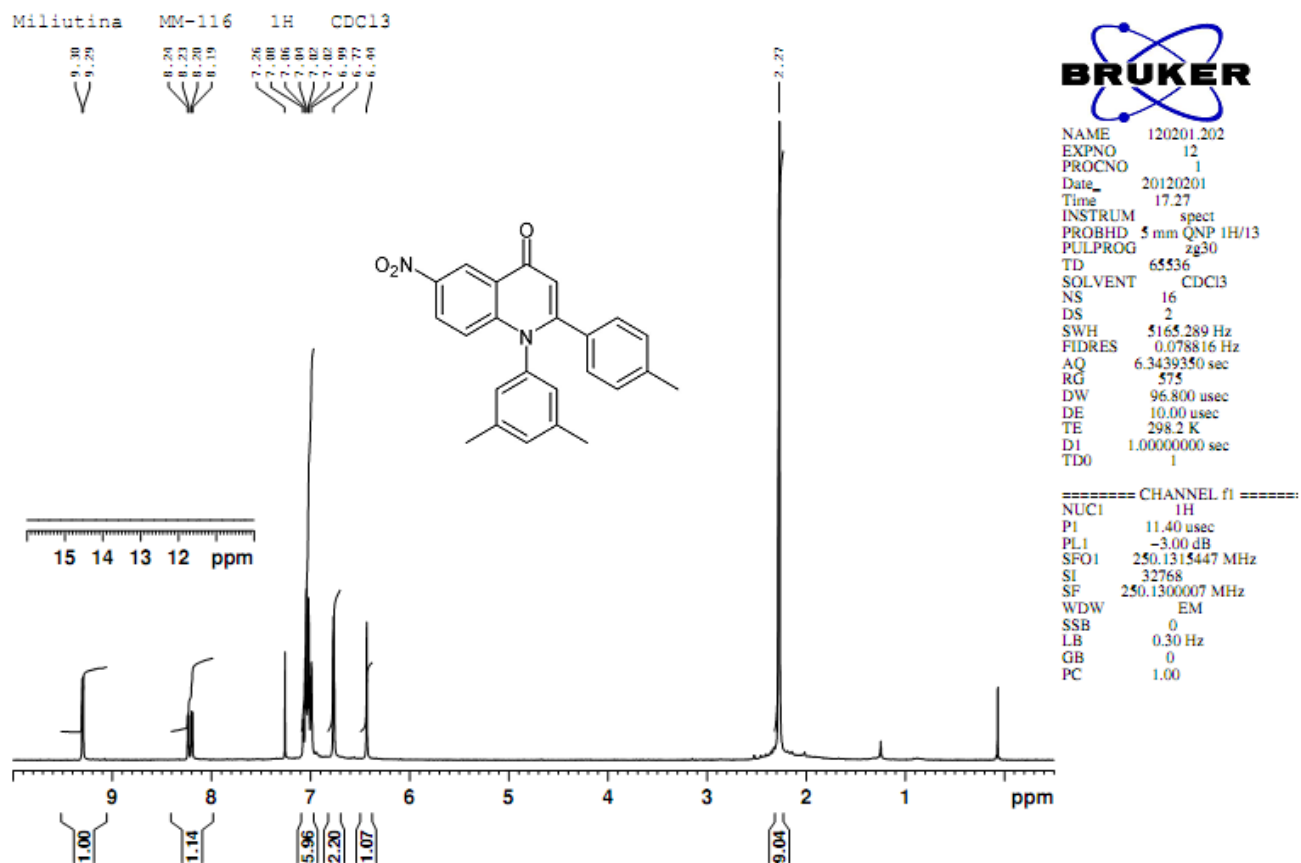

## 1-(3,5-Dimethylphenyl)-6-nitro-2-p-tolylquinolin-4(1H)-one (7am).

Miliutina MM-116 13C CDCl3

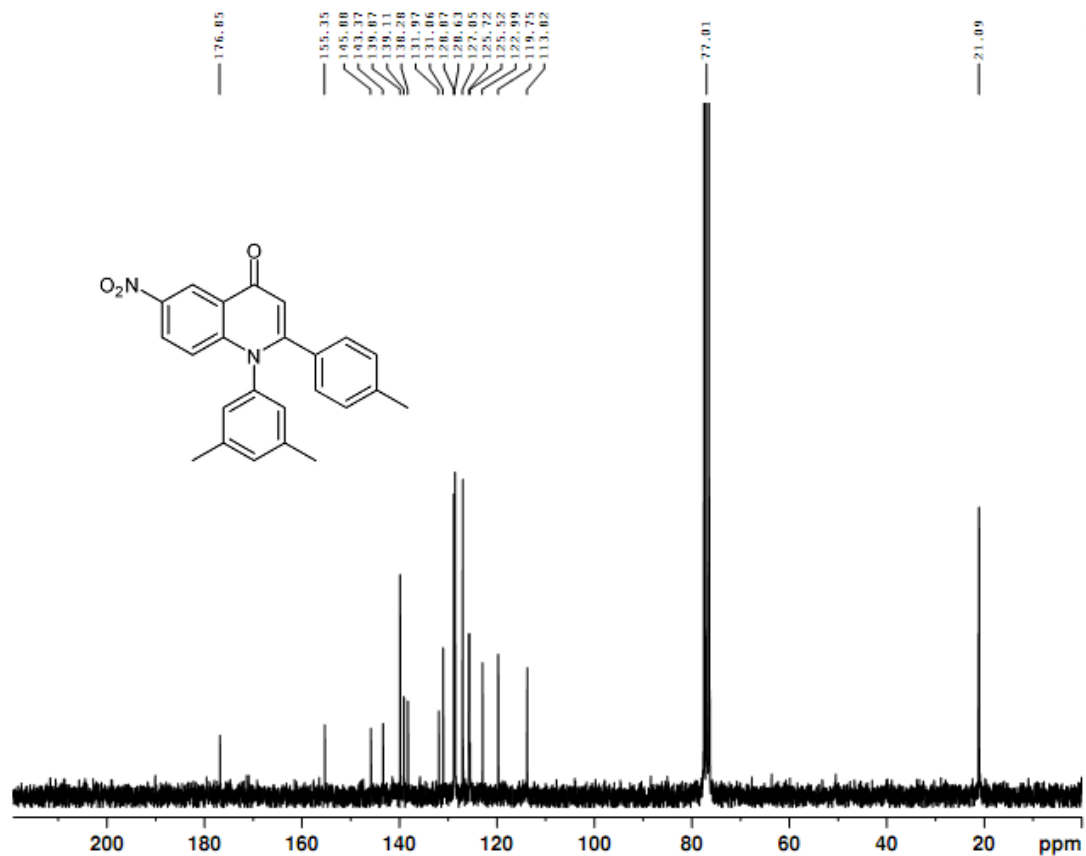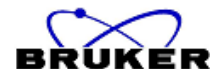

NAME 120201.202  
 EXPNO 10  
 PROCNO 1  
 Date\_ 20120201  
 Time 13.50  
 INSTRUM spect  
 PROBHD 5 mm QNP 1H/13  
 PULPROG zgpg30  
 TD 65536  
 SOLVENT CDCl3  
 NS 1400  
 DS 4  
 SWH 15000.000 Hz  
 FIDRES 0.228882 Hz  
 AQ 2.1845834 sec  
 RG 2050  
 DW 33.333 usec  
 DE 10.00 usec  
 TE 298.2 K  
 D1 2.0000000 sec  
 d11 0.0300000 sec  
 DELTA 1.89999998 sec  
 TD0 1

==== CHANNEL f1 ====  
 NUC1 13C  
 P1 10.20 usec  
 PL1 0.00 dB  
 SFO1 62.9015280 MHz

==== CHANNEL f2 ====  
 CPDPRG2 waltz16  
 NUC2 1H  
 PCPD2 70.00 usec  
 PL12 14.00 dB  
 PL13 14.00 dB  
 PL2 -3.00 dB  
 SFO2 250.1310005 MHz  
 SI 32768  
 SF 62.8952390 MHz  
 WDW EM  
 SSB 0  
 LB 1.00 Hz  
 GB 0  
 PC 1.40

1-(2,3-Dihydro-1*H*-inden-5-yl)-6-nitro-2-*p*-tolylquinolin-4(1*H*)-one (7an).

Miliutina Mariia, MM-119, 1H in CDCl3/DMSO 9:1

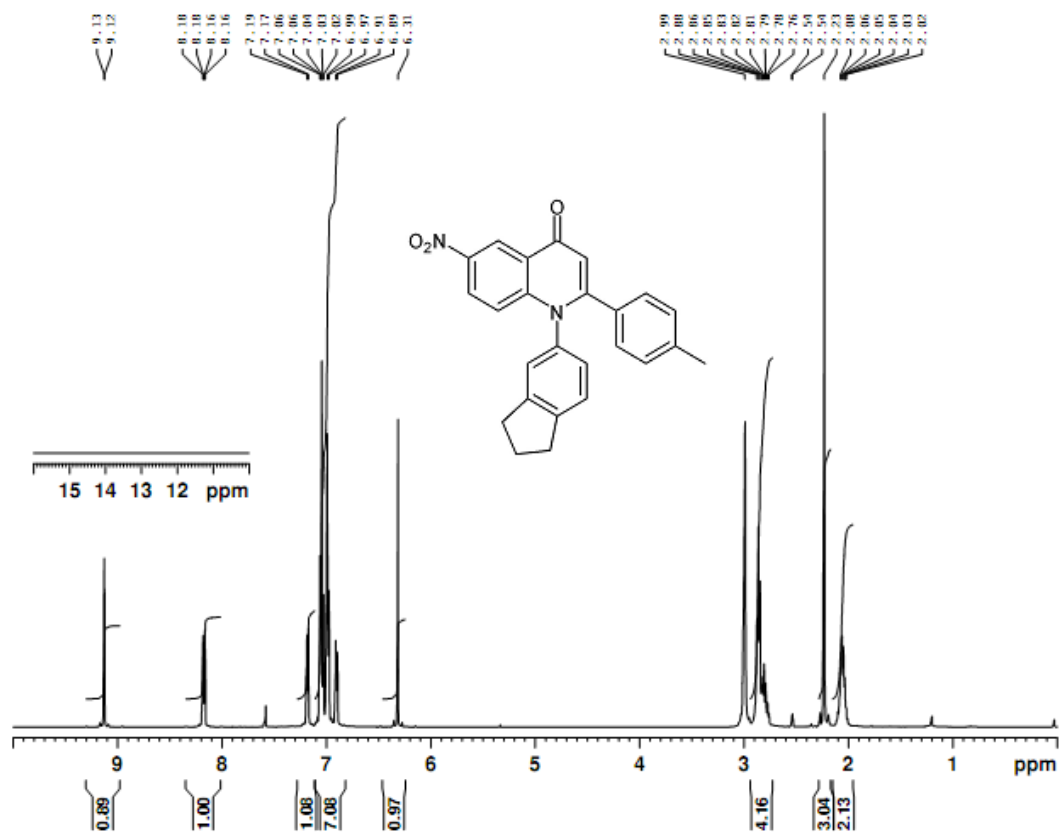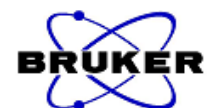

NAME 120202.503  
 EXPNO 10  
 PROCNO 1  
 Date\_ 20120203  
 Time 4.38  
 INSTRUM spect  
 PROBHD 5 mm PABBO BB-  
 PULPROG zg30  
 TD 65536  
 SOLVENT CDCl3  
 NS 32  
 DS 2  
 SWH 15015.015 Hz  
 FIDRES 0.229111 Hz  
 AQ 2.1824322 sec  
 RG 90.5  
 DW 33.300 usec  
 DE 6.50 usec  
 TE 300.0 K  
 D1 1.0000000 sec  
 TDO 1

----- CHANNEL f1 -----  
 NUC1 1H  
 P1 9.80 usec  
 PL1 -3.00 dB  
 SFO1 500.1350013 MHz  
 SI 32768  
 SF 500.1323608 MHz  
 WDW EM  
 SSB 0  
 LB 0.30 Hz  
 GB 0  
 PC 1.00



1-(2,3-Dihydro-1*H*-inden-5-yl)-6-nitro-2-*p*-tolylquinolin-4(1*H*)-one (7an).Miliutina Mariia, MM-119, <sup>13</sup>C in CDCl<sub>3</sub>/DMSO 9:1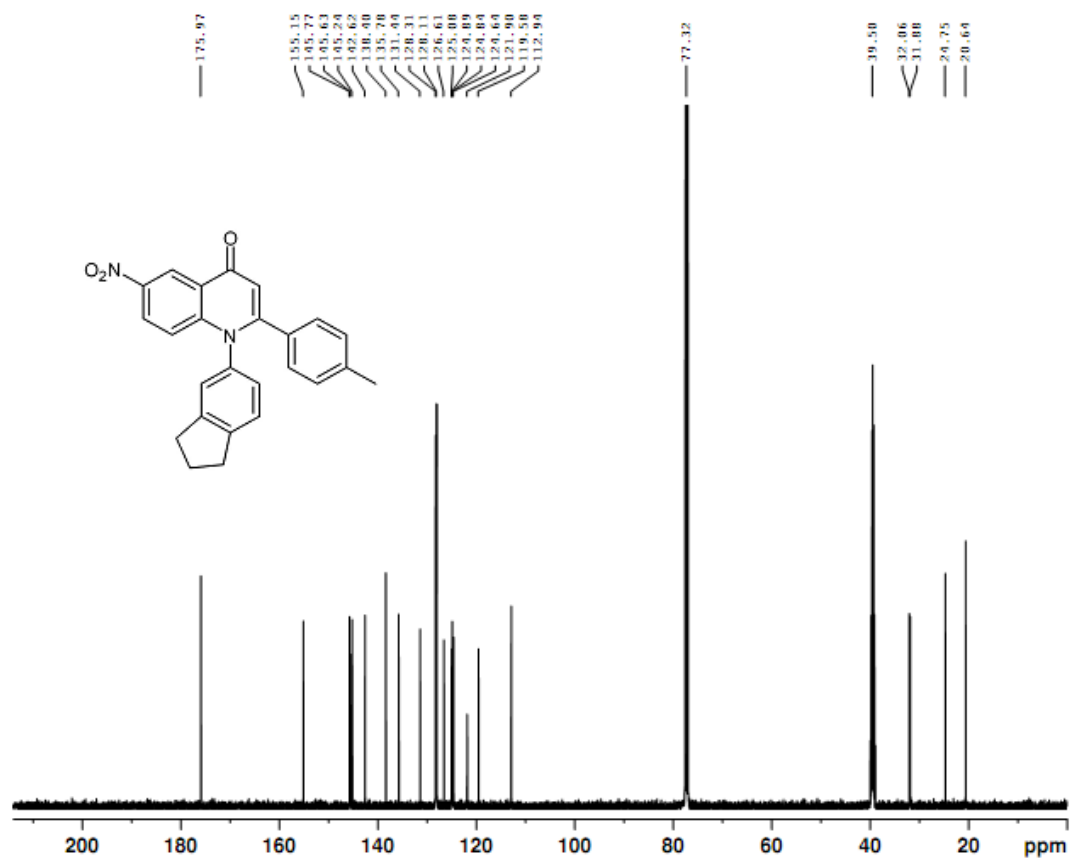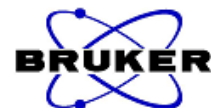

NAME 120202.503  
 EXPNO 13  
 PROCNO 1  
 Date\_ 20120203  
 Time 6.48  
 INSTRUM spect  
 PROBHD 5 mm PABBO BB-  
 PULPROG zgpg30  
 TD 65536  
 SOLVENT CDCl<sub>3</sub>  
 NS 1024  
 DS 4  
 SWH 30030.029 Hz  
 FIDRES 0.458222 Hz  
 AQ 1.0912410 sec  
 RG 4597.6  
 DW 16.650 usec  
 DE 6.50 usec  
 TE 300.0 K  
 D1 2.0000000 sec  
 D11 0.03000000 sec  
 TD0 1

===== CHANNEL f1 =====  
 NUC1 <sup>13</sup>C  
 P1 9.00 usec  
 PL1 4.50 dB  
 SFO1 125.7703643 MHz

===== CHANNEL f2 =====  
 CPDPRG2 waltz16  
 NUC2 <sup>1</sup>H  
 PCPD2 70.00 usec  
 PL2 -3.00 dB  
 PL12 14.08 dB  
 PL13 120.00 dB  
 SFO2 500.1320005 MHz  
 SI 32768  
 SF 125.7584602 MHz  
 WDW EM  
 SSB 0  
 LB 1.00 Hz  
 GB 0  
 PC 1.40

## 1-(3-Methoxyphenyl)-6-nitro-2-p-tolylquinolin-4(1H)-one (7ao).

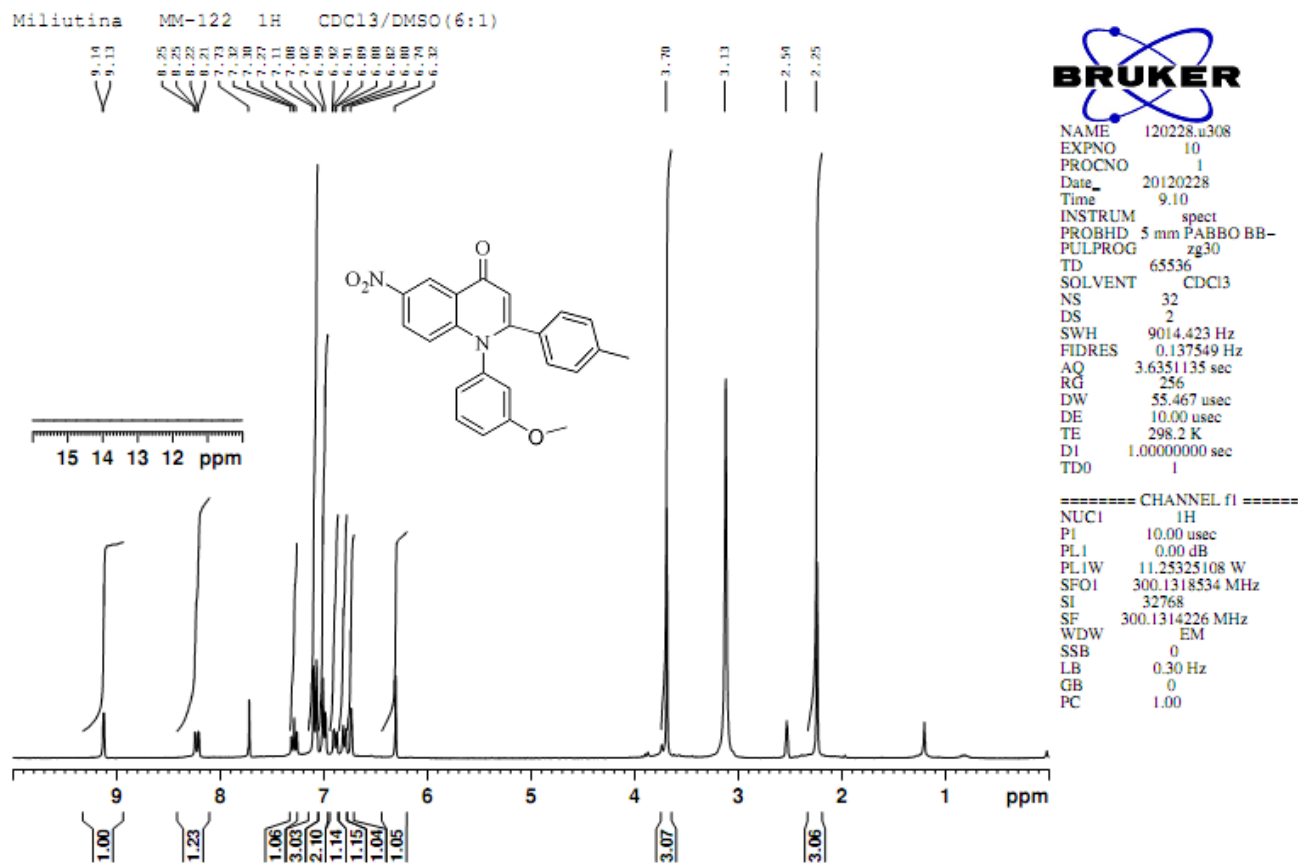

## 1-(3-Methoxyphenyl)-6-nitro-2-p-tolylquinolin-4(1H)-one (7ao).

Miliutina MM-122 13C CDCl3/DMSO(6:1)

175.83  
 160.01  
 159.78  
 145.24  
 142.69  
 138.68  
 138.56  
 130.96  
 130.77  
 130.66  
 128.23  
 128.13  
 125.29  
 124.78  
 121.79  
 121.13  
 119.95  
 117.98  
 114.78  
 112.80

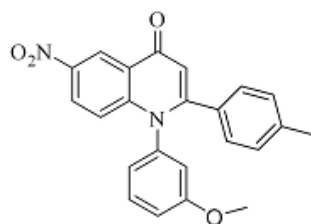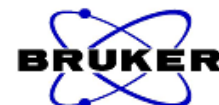

NAME 120228\_0308  
 EXPNO 1  
 PROCNO 1  
 Date\_ 20120228  
 Time 23.44  
 INSTRUM spect  
 PROBHD 5 mm PABBO BB-  
 PULPROG zgpg30  
 TD 65536  
 SOLVENT CDCl3  
 NS 1024  
 DS 4  
 SWH 18028.846 Hz  
 FIDRES 0.275098 Hz  
 AQ 1.8175818 sec  
 RG 2050  
 DW 27.733 usec  
 DE 10.00 usec  
 TE 298.2 K  
 D1 2.00000000 sec  
 D11 0.03000000 sec  
 TD0 1

===== CHANNEL f1 =====  
 NUC1 13C  
 P1 10.00 usec  
 PL1 -0.50 dB  
 PL1W 33.25691986 W  
 SFO1 75.4752953 MHz

===== CHANNEL f2 =====  
 CPDPRG2 waltz16  
 NUC2 1H  
 PCPD2 72.00 usec  
 PL2 0.00 dB  
 PL12 17.00 dB  
 PL13 17.00 dB  
 PL2W 11.25325108 W  
 PL12W 0.22453187 W  
 PL13W 0.22453187 W  
 SFO2 300.1312005 MHz  
 S1 32768  
 SF 75.4681560 MHz  
 WDW EM  
 SSB 0  
 LB 1.00 Hz  
 GB 0  
 PC 1.40

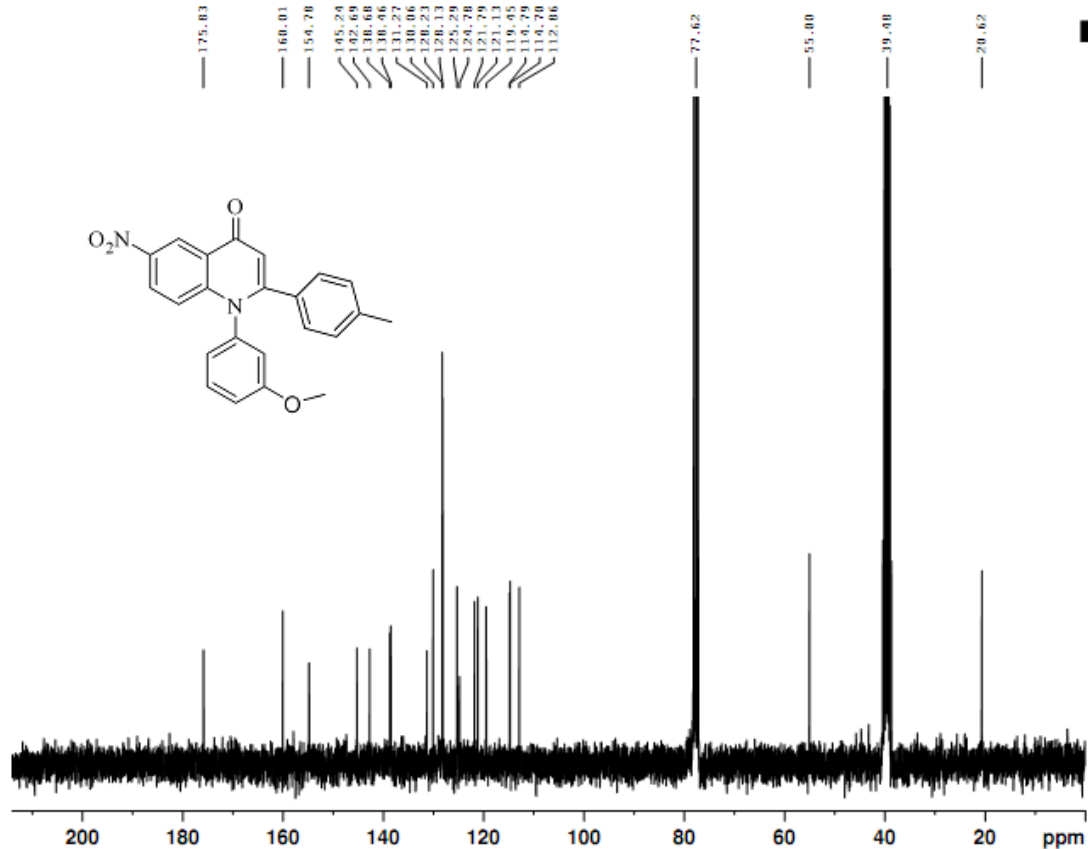

1-(4-Methoxyphenyl)-6-nitro-2-*p*-tolylquinolin-4(1*H*)-one (7ap).

Miliutina MM128 1H CDCl3/DMSO(8:1)

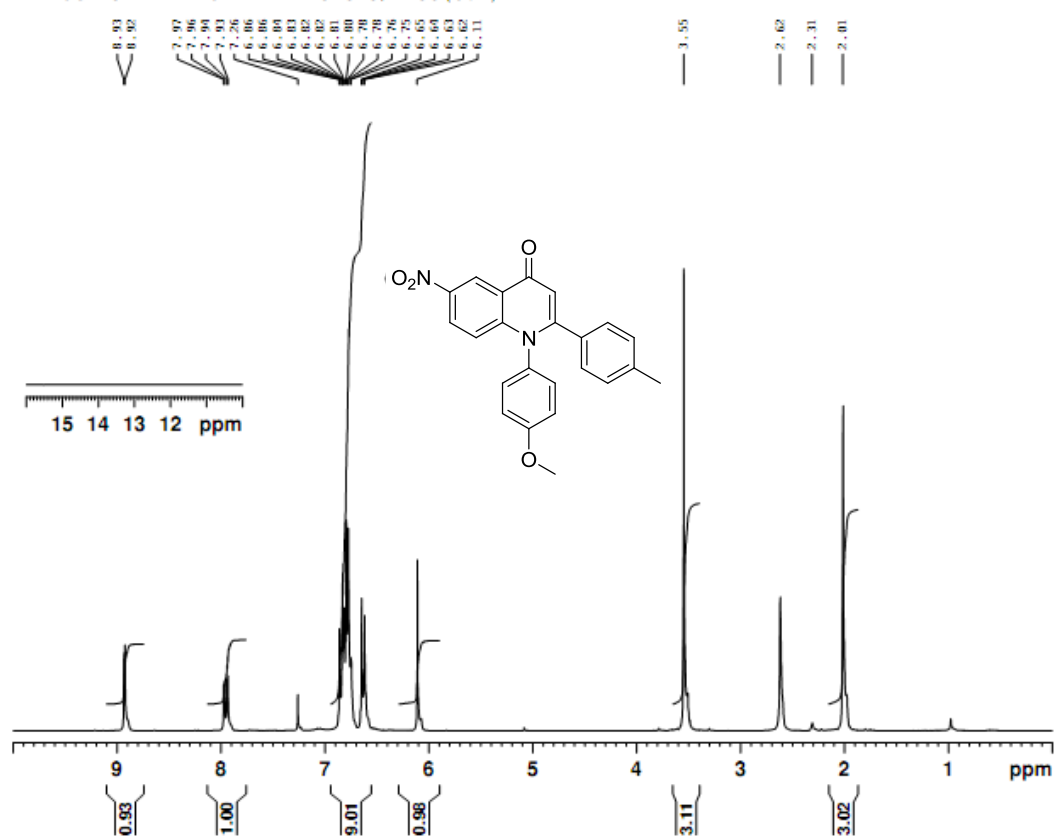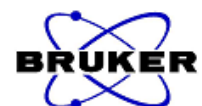

NAME 120327.u303  
 EXPNO 10  
 PROCNO 1  
 Date\_ 20120327  
 Time 8.32  
 INSTRUM spect  
 PROBHD 5 mm PABBO BB-  
 PULPROG zg30  
 TD 65536  
 SOLVENT CDCl3  
 NS 32  
 DS 2  
 SWH 9014.423 Hz  
 FIDRES 0.137549 Hz  
 AQ 3.6351135 sec  
 RG 161  
 DW 55.467 usec  
 DE 10.00 usec  
 TE 298.2 K  
 D1 1.0000000 sec  
 TD0 1

===== CHANNEL f1 =====  
 NUC1 1H  
 P1 10.00 usec  
 PL1 0.00 dB  
 PL1W 11.25325108 W  
 SFO1 300.1318534 MHz  
 SI 32768  
 SF 300.1314975 MHz  
 WDW EM  
 SSB 0  
 LB 0.30 Hz  
 GB 0  
 PC 1.00

## 1-(4-Methoxyphenyl)-6-nitro-2-p-tolylquinolin-4(1H)-one (7ap).

Miliutina MM128 13C CDCl3/DMSO(8:1)

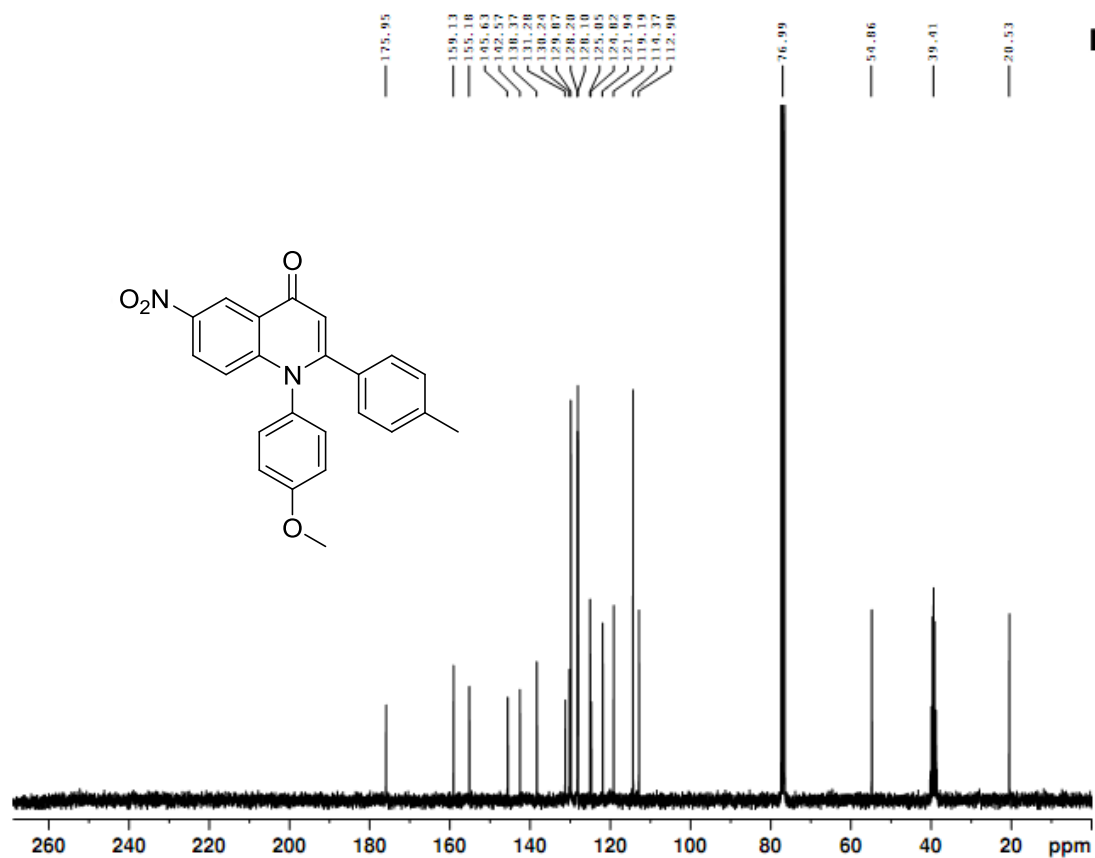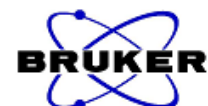

NAME 120327.u303  
 EXPNO 11  
 PROCNO 1  
 Date\_ 20120327  
 Time 21.18  
 INSTRUM spect  
 PROBHD 5 mm PABBO BB-  
 PULPROG zgpg30  
 TD 65536  
 SOLVENT CDCl3  
 NS 1024  
 DS 4  
 SWH 26315.789 Hz  
 FIDRES 0.401547 Hz  
 AQ 1.2452340 sec  
 RG 2050  
 DW 19.000 usec  
 DE 10.00 usec  
 TE 298.3 K  
 D1 2.0000000 sec  
 D11 0.03000000 sec  
 TDO 1

===== CHANNEL f1 =====  
 NUC1 13C  
 P1 10.00 usec  
 PL1 -0.50 dB  
 PL1W 33.25691986 W  
 SFO1 75.4752953 MHz

===== CHANNEL f2 =====  
 CPDPRG2 waltz16  
 NUC2 1H  
 PCPD2 72.00 usec  
 PL2 0.00 dB  
 PL12 17.00 dB  
 PL13 17.00 dB  
 PL2W 11.25325108 W  
 PL12W 0.22453187 W  
 PL13W 0.22453187 W  
 SFO2 300.1312005 MHz  
 S1 32768  
 SF 75.4681614 MHz  
 WDW EM  
 SSB 0  
 LB 1.00 Hz  
 GB 0  
 PC 1.40

6-Nitro-1-(3-bromophenyl)-2-*p*-tolyl-4-quinolone (7aq).

Ivanov AI-9 1H CDC13/DMSO (8:1)

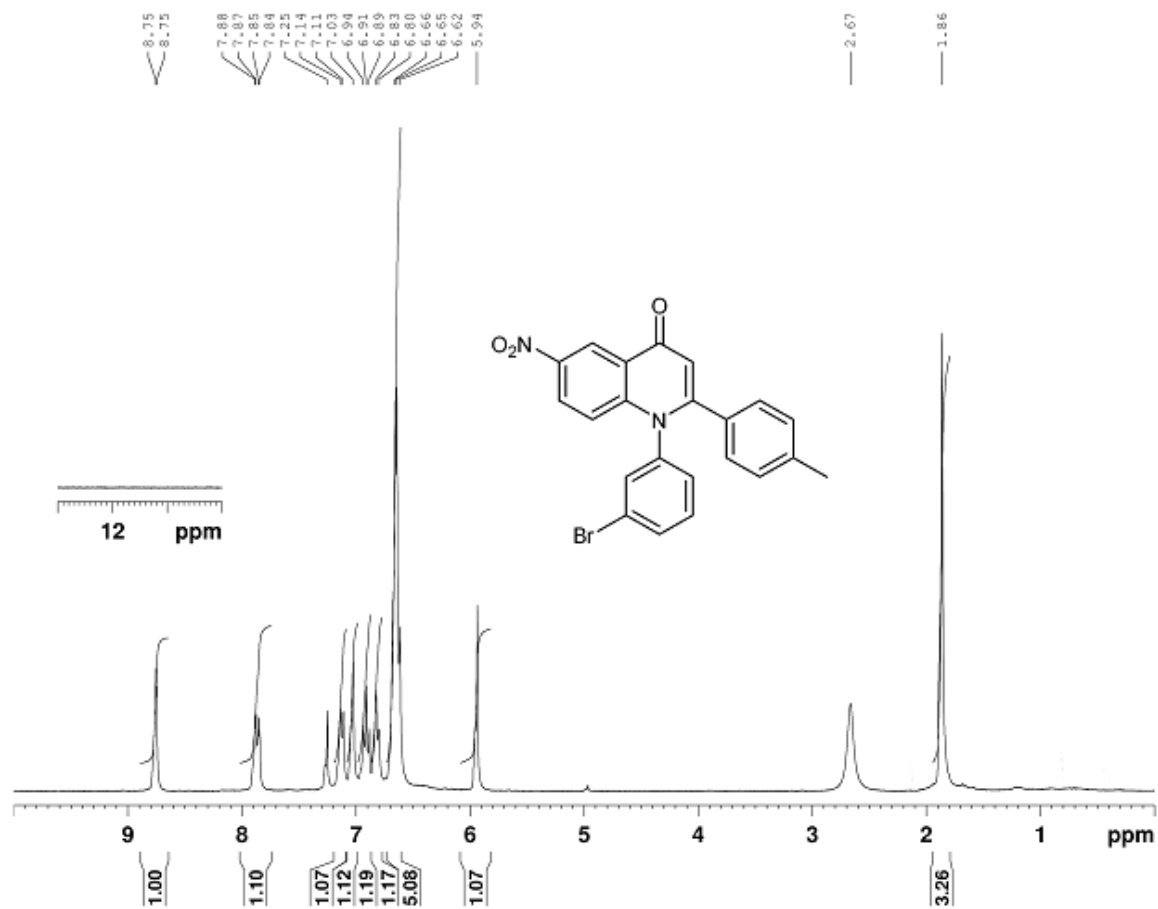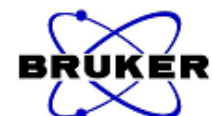

NAME 120123.u326  
 EXPNO 10  
 PROCNO 1  
 Date\_ 20120123  
 Time 12.42  
 INSTRUM spect  
 PROBHD 5 mm PABBO BB-  
 PULPROG zg30  
 TD 65536  
 SOLVENT CDCl3  
 NS 32  
 DS 2  
 SWH 7500.000 Hz  
 FIDRES 0.114441 Hz  
 AQ 4.3691168 sec  
 RG 228  
 DW 66.667 usec  
 DE 10.00 usec  
 TE 298.2 K  
 D1 1.00000000 sec  
 TD0 1

===== CHANNEL f1 =====  
 NUC1 1H  
 P1 10.00 usec  
 PL1 0.00 dB  
 PL1W 11.25325108 W  
 SFO1 300.1318534 MHz  
 SI 32768  
 SF 300.1315400 MHz  
 WDW EM  
 SSB 0  
 LB 0.30 Hz  
 GB 0  
 PC 1.00

6-Nitro-1-(3-bromophenyl)-2-*p*-tolyl-4-quinolone (7aq).

Ivanov AI-9 13C CDCl3/DMSO(8:1)

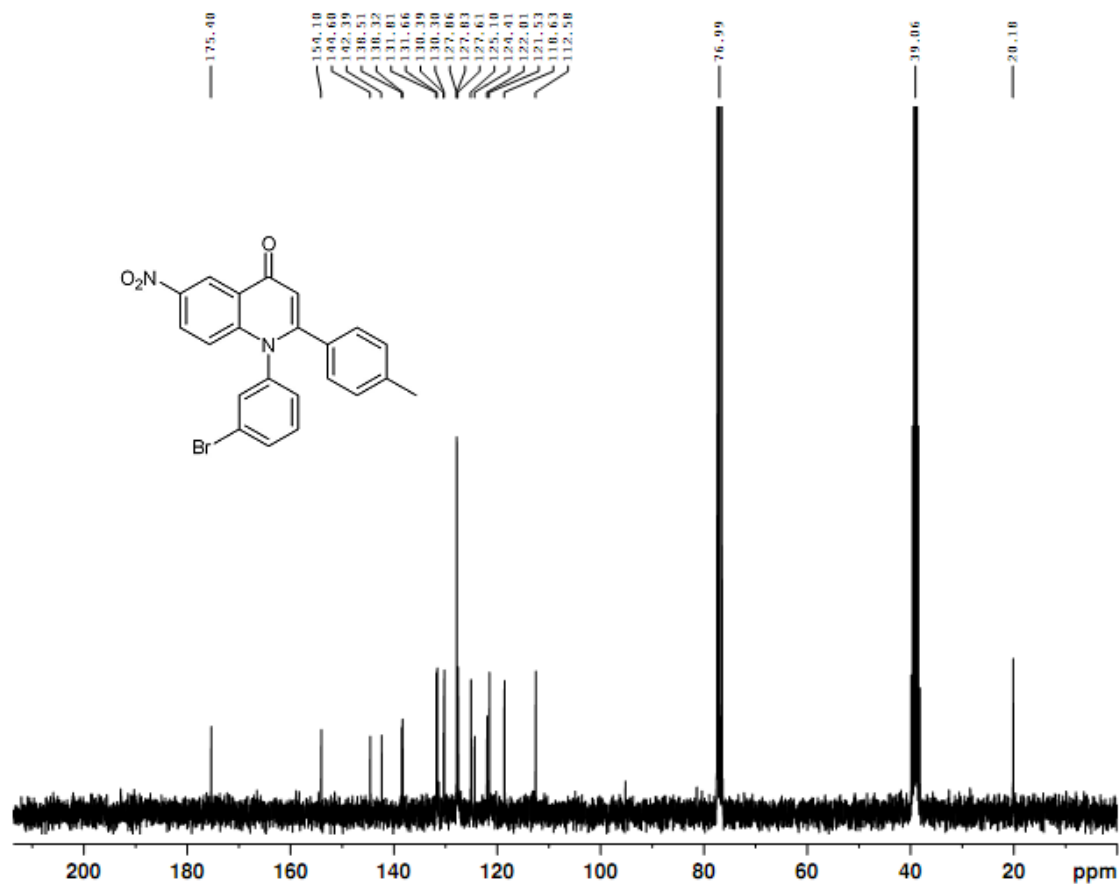

NAME 120123.0326  
 EXPNO 12  
 PROCNO 1  
 Date\_ 20120124  
 Time 7.40  
 INSTRUM spect  
 PROBHD 5 mm PABBO BB-  
 PULPROG zgpg30  
 TD 65536  
 SOLVENT CDCl3  
 NS 1024  
 DS 4  
 SWH 18028.846 Hz  
 FIDRES 0.275098 Hz  
 AQ 1.8175818 sec  
 RG 2050  
 DW 27.733 usec  
 DE 10.00 usec  
 TE 298.2 K  
 D1 2.0000000 sec  
 D11 0.03000000 sec  
 TDO 1

===== CHANNEL f1 =====  
 NUC1 13C  
 P1 10.00 usec  
 PL1 -0.50 dB  
 PL1W 33.25691986 W  
 SFO1 75.4752953 MHz

===== CHANNEL f2 =====  
 CPDPRG2 waltz16  
 NUC2 1H  
 PCPD2 72.00 usec  
 PL2 0.00 dB  
 PL12 17.00 dB  
 PL13 17.00 dB  
 PL2W 11.25325108 W  
 PL12W 0.22453187 W  
 PL13W 0.22453187 W  
 SFO2 300.1312005 MHz  
 SI 32768  
 SF 75.4681893 MHz  
 WDW EM  
 SSB 0  
 LB 1.00 Hz  
 GB 0  
 PC 1.40

## 1-(3,4-Dimethoxyphenethyl)-6-nitro-2-phenylquinolin-4(1H)-one (7ba).

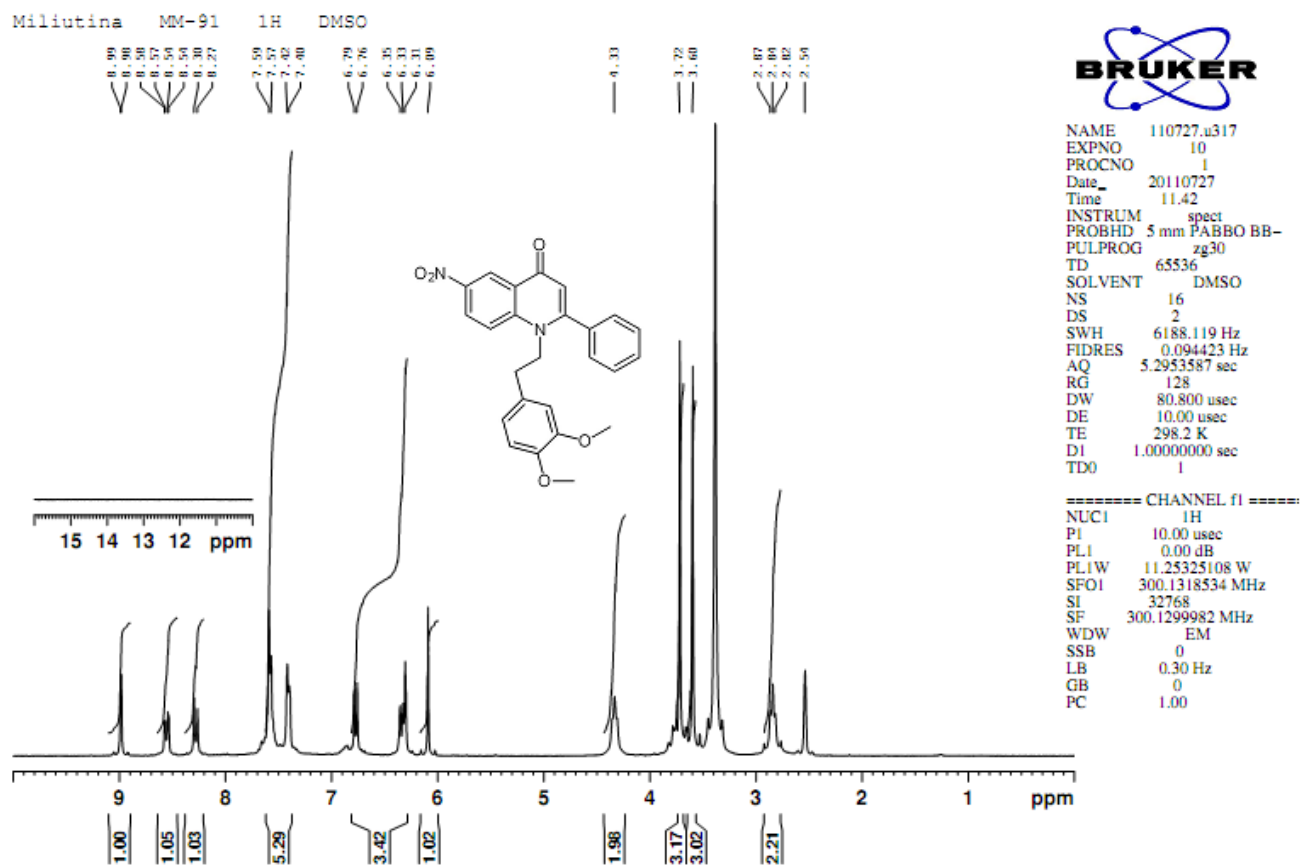



## 1-(3,4-Dimethoxyphenethyl)-6-nitro-2-phenylquinolin-4(1H)-one (7ba).

Miliutina MM-91 13C DMSO

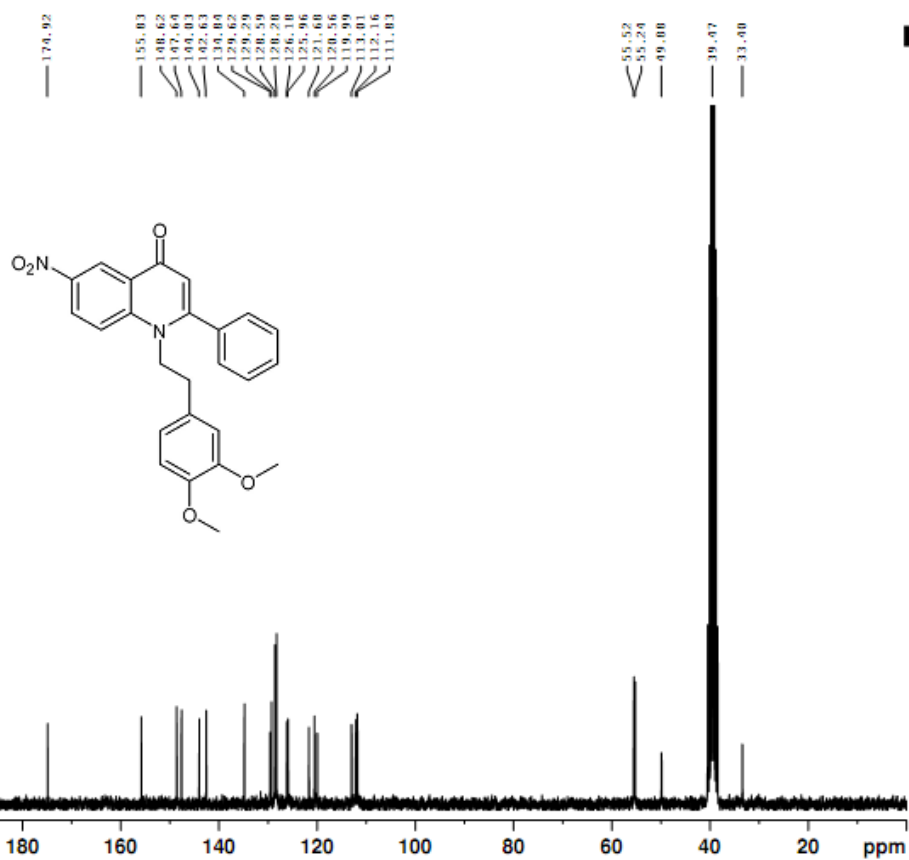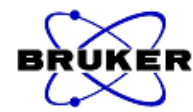

NAME 110727.205  
 EXPNO 10  
 PROCNO 1  
 Date\_ 20110727  
 Time 16.25  
 INSTRUM spect  
 PROBHD 5 mm PABBO BB-  
 PULPROG zgpg30  
 TD 65536  
 SOLVENT DMSO  
 NS 1024  
 DS 4  
 SWH 15000.000 Hz  
 FIDRES 0.228882 Hz  
 AQ 2.1845834 sec  
 RG 2050  
 DW 33.333 usec  
 DE 10.00 usec  
 TE 298.8 K  
 D1 2.00000000 sec  
 d11 0.03000000 sec  
 DELTA 1.89999998 sec  
 TD0 1

===== CHANNEL f1 =====  
 NUC1 13C  
 P1 10.00 usec  
 PL1 -1.00 dB  
 SFO1 62.9015280 MHz

===== CHANNEL f2 =====  
 CPDPRG2 waltz16  
 NUC2 1H  
 PCPD2 70.00 usec  
 PL12 15.00 dB  
 PL13 15.00 dB  
 PL2 -2.50 dB  
 SFO2 250.1310005 MHz  
 S1 32768  
 SF 62.8952704 MHz  
 WDW EM  
 SSB 0  
 LB 1.00 Hz  
 GB 0  
 PC 1.40

## 1-(4-Methoxybenzyl)-6-nitro-2-phenylquinolin-4(1H)-one (7bb).

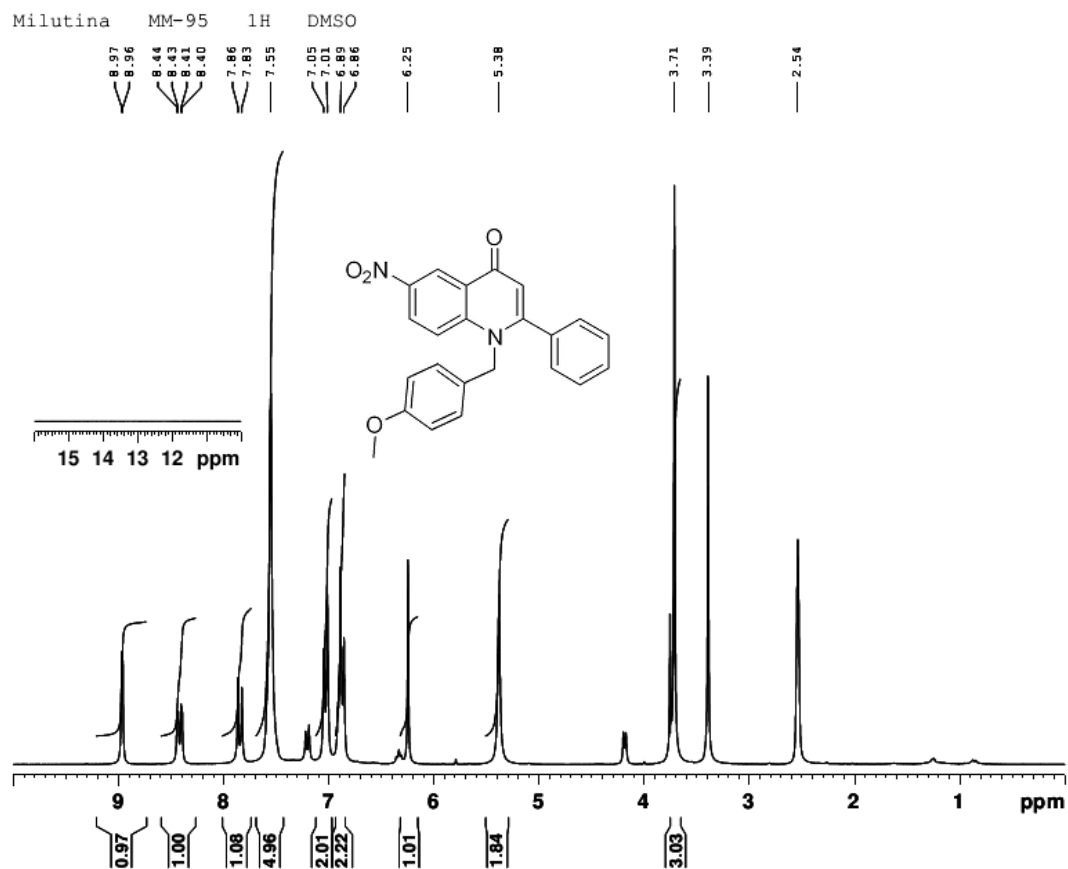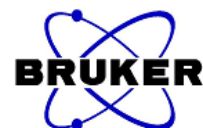

NAME 121024.207  
EXPNO 10  
PROCNO 1  
Date\_ 20121024  
Time 14.12  
INSTRUM spect  
PROBHD 5 mm PABBO BB-  
PULPROG zg30  
TD 65536  
SOLVENT DMSO  
NS 16  
DS 2  
SWH 5165.289 Hz  
FIDRES 0.078816 Hz  
AQ 6.3439350 sec  
RG 322  
DW 96.800 usec  
DE 10.00 usec  
TE 296.5 K  
D1 1.00000000 sec  
TD0 1

===== CHANNEL f1 =====  
NUC1 1H  
P1 10.00 usec  
PL1 -2.50 dB  
SFO1 250.1315447 MHz  
SI 32768  
SF 250.1299880 MHz  
WDW EM  
SSB 0  
LB 0.30 Hz  
GB 0  
PC 1.00

## 1-(4-Methoxybenzyl)-6-nitro-2-phenylquinolin-4(1H)-one (7bb).

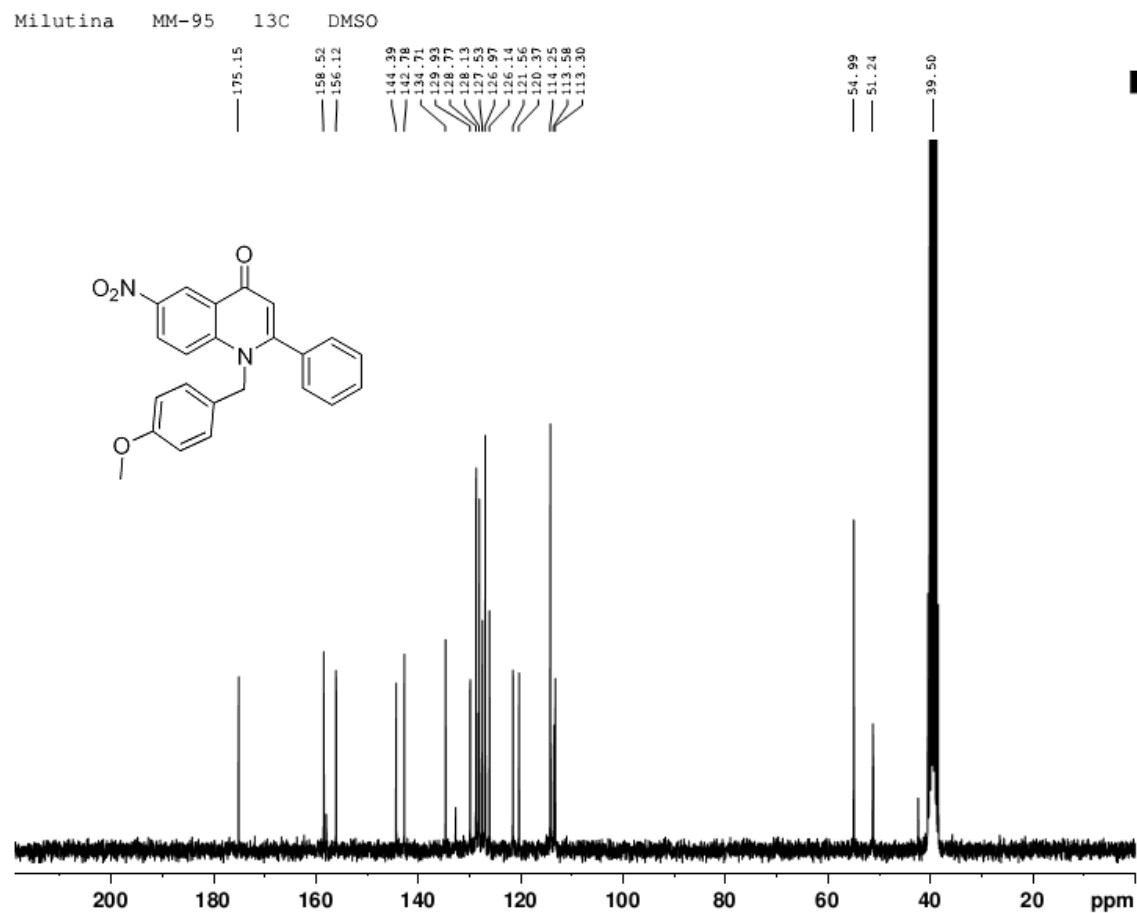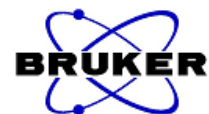

NAME 121024.207  
EXPNO 11  
PROCNO 1  
Date\_ 20121024  
Time 20.35  
INSTRUM spect  
PROBHD 5 mm PABBO BB-  
PULPROG zgpg30  
TD 65536  
SOLVENT DMSO  
NS 1024  
DS 4  
SWH 15000.000 Hz  
FIDRES 0.228882 Hz  
AQ 2.1845834 sec  
RG 2050  
DW 33.333 usec  
DE 10.00 usec  
TE 297.4 K  
D1 2.00000000 sec  
d11 0.03000000 sec  
DELTA 1.89999998 sec  
TD0 1

==== CHANNEL f1 ====  
NUC1 13C  
P1 10.00 usec  
PL1 -1.00 dB  
SFO1 62.9015280 MHz

==== CHANNEL f2 ====  
CPDPRG2 waltz16  
NUC2 1H  
PCPD2 70.00 usec  
PL12 15.00 dB  
PL13 15.00 dB  
PL2 -2.50 dB  
SFO2 250.1310005 MHz  
SI 32768  
SF 62.8952687 MHz  
WDW EM  
SSB 0  
LB 1.00 Hz  
GB 0  
PC 1.40

## 6-Nitro-1-phenethyl-2-phenylquinolin-4(1H)-one (7bc).

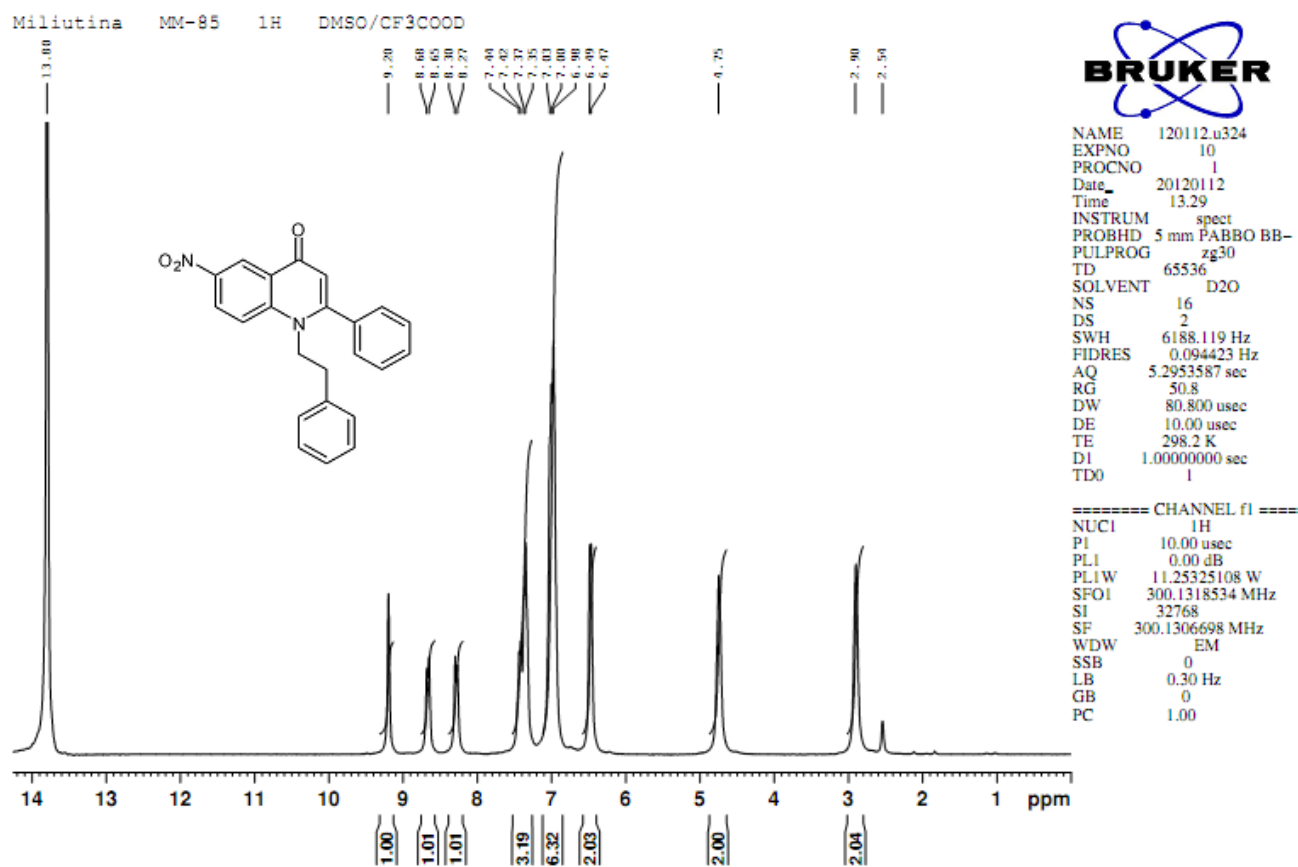

## 6-Nitro-1-phenethyl-2-phenylquinolin-4(1H)-one (7bc).

Miliutina MM-85 13C DMSO-*d*<sub>6</sub>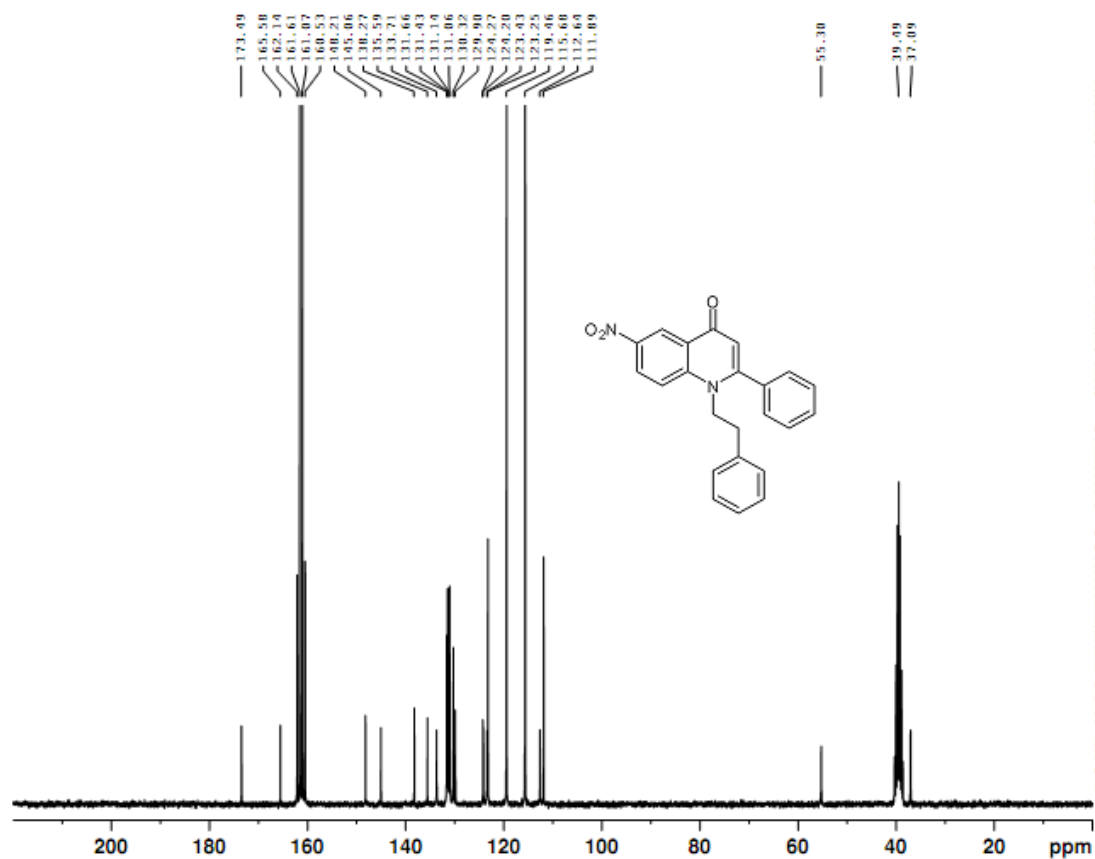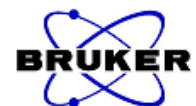

NAME 120112\_u324  
 EXPNO 12  
 PROCNO 1  
 Date\_ 20120113  
 Time 2.30  
 INSTRUM spect  
 PROBHD 5 mm PABBO BB-  
 PULPROG zgpg30  
 TD 65536  
 SOLVENT D2O  
 NS 1024  
 DS 4  
 SWH 18028.846 Hz  
 FIDRES 0.275098 Hz  
 AQ 1.8175818 sec  
 RG 2050  
 DW 27.733 usec  
 DE 10.00 usec  
 TE 298.2 K  
 D1 2.00000000 sec  
 D11 0.03000000 sec  
 TDO 1

===== CHANNEL f1 =====

NUC1 13C  
 P1 10.00 usec  
 PL1 -0.50 dB  
 PL1W 33.25691986 W  
 SFO1 75.4752953 MHz

===== CHANNEL f2 =====

CPDPRG2 waltz16  
 NUC2 1H  
 PCPD2 72.00 usec  
 PL2 0.00 dB  
 PL12 17.00 dB  
 PL13 17.00 dB  
 PL2W 11.25325108 W  
 PL12W 0.22453187 W  
 PL13W 0.22453187 W  
 SFO2 300.1312005 MHz  
 SI 32768  
 SF 75.4677074 MHz  
 WDW EM  
 SSB 0  
 LB 1.00 Hz  
 GB 0  
 PC 1.40

## 6-Nitro-4-oxo-2-phenyl-1-(3-phenylpropyl)quinoline (7bd).

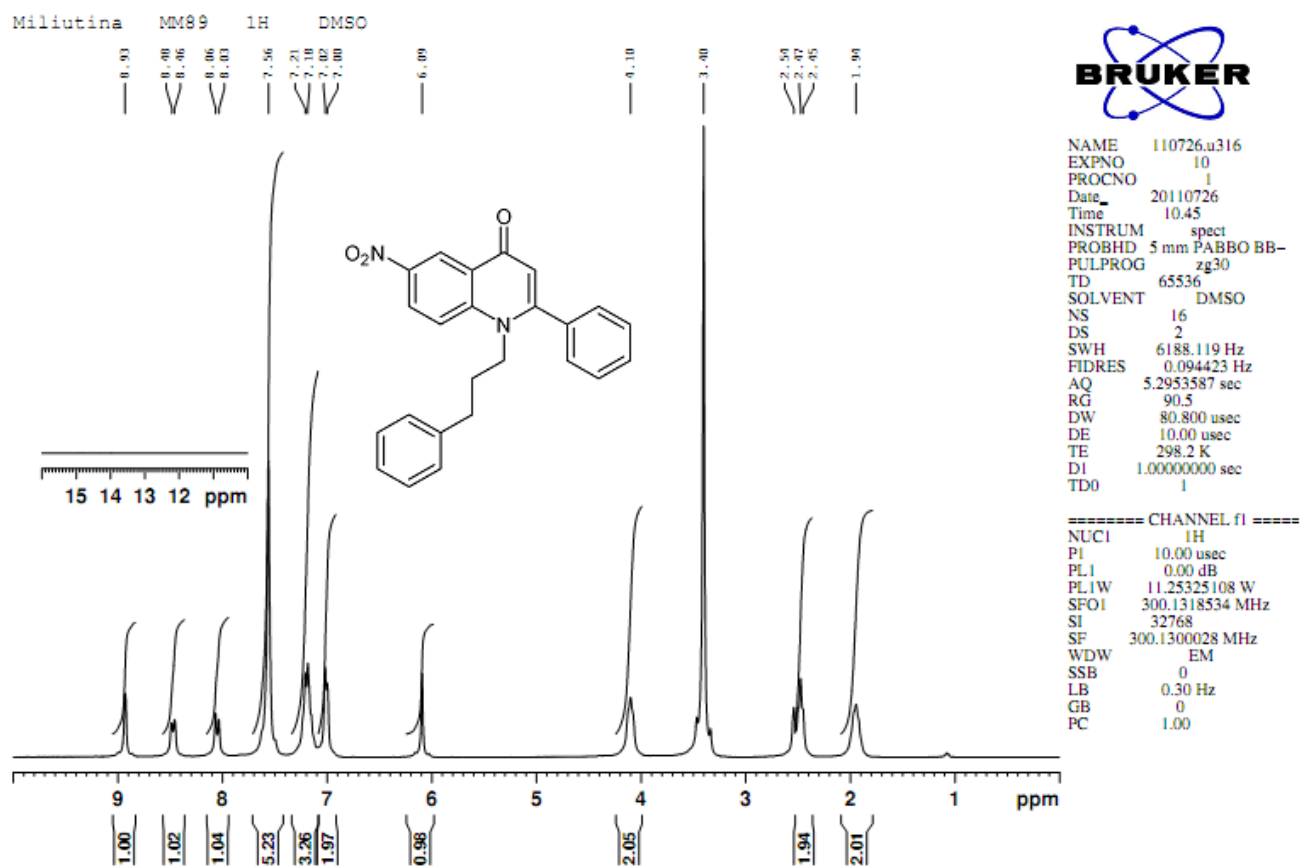

## 6-Nitro-4-oxo-2-phenyl-1-(3-phenylpropyl)quinoline (7bd).

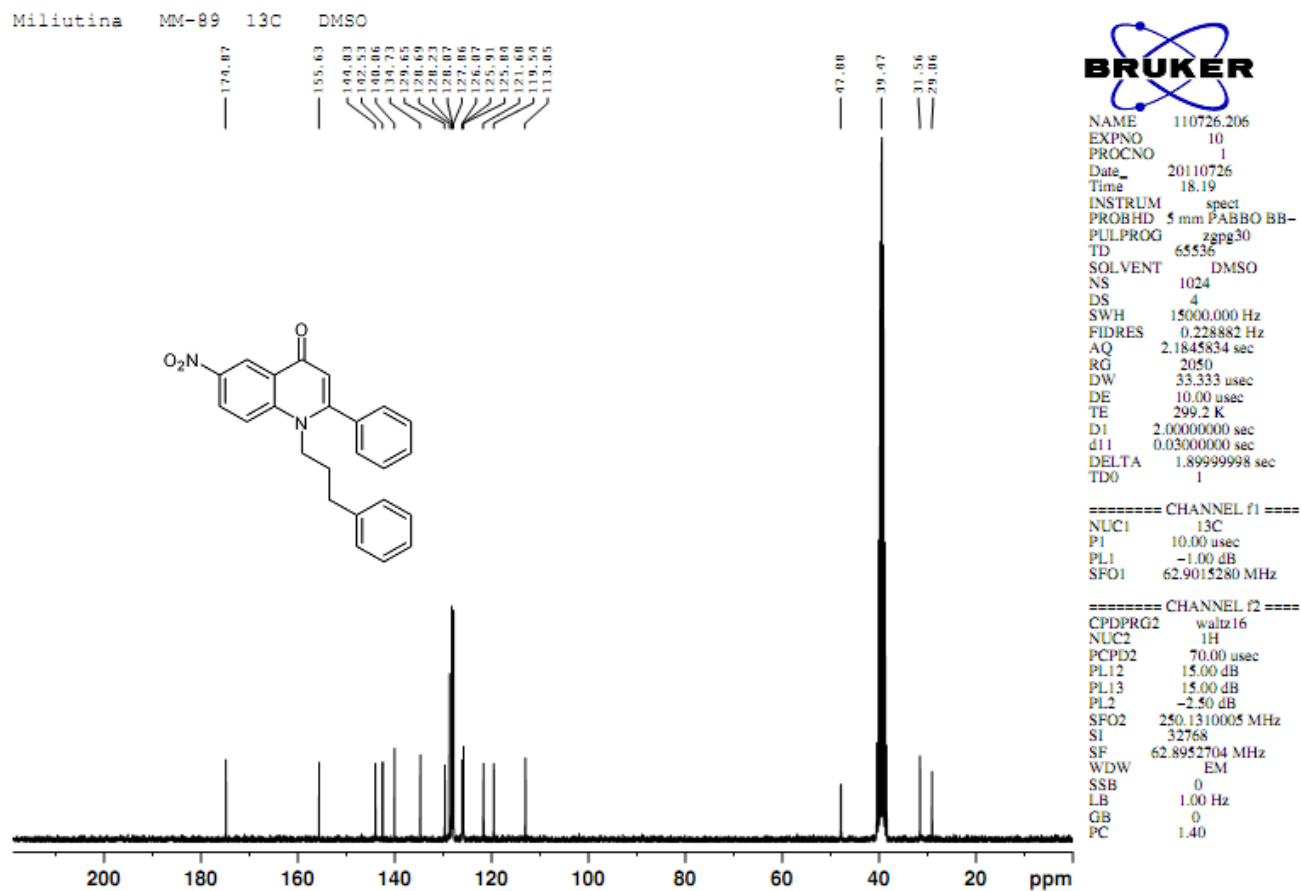

## 1-Heptyl-6-nitro-2-phenylquinolin-4(1H)-one (7be).

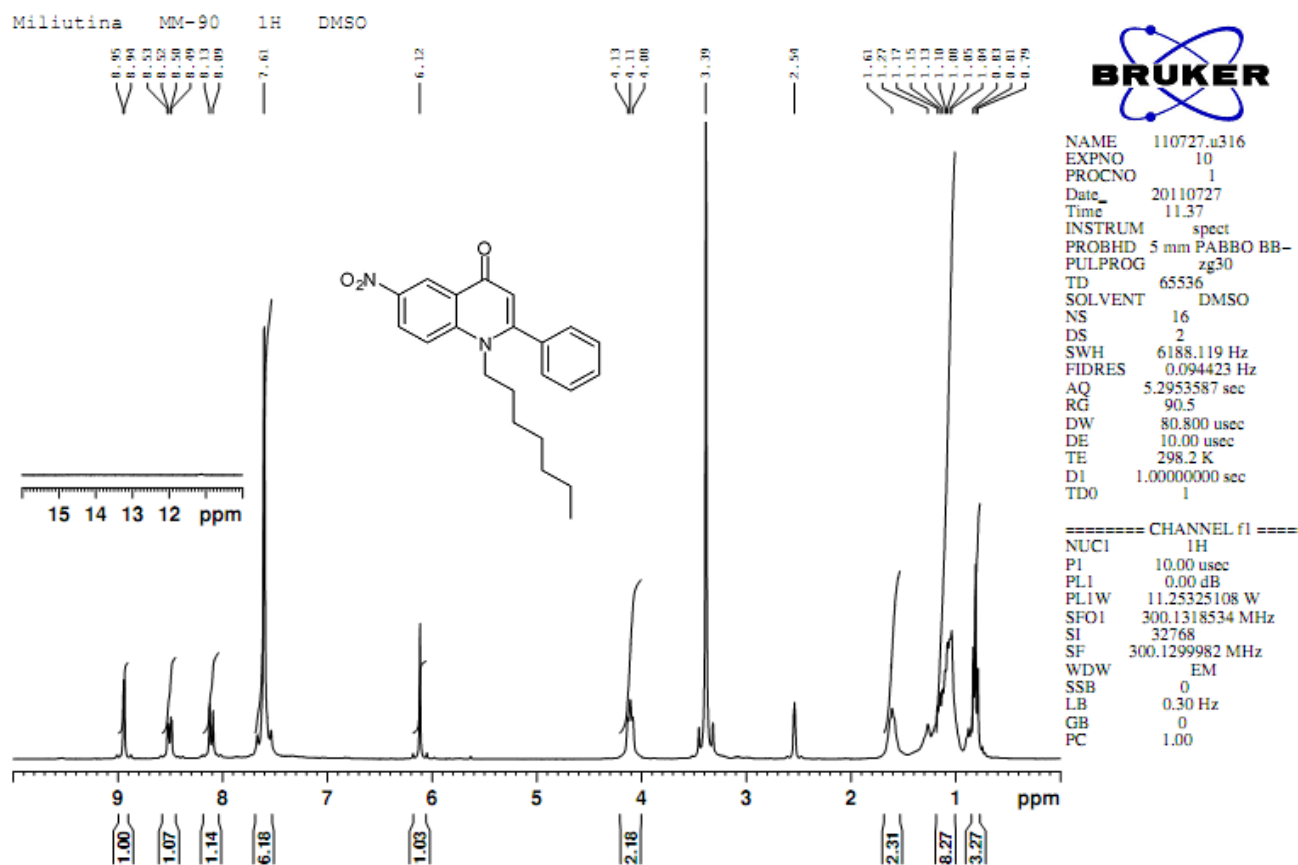



## 1-Heptyl-6-nitro-2-phenylquinolin-4(1H)-one (7be).

Miliutina MM-90 13C DMSO

179.05  
155.66  
144.01  
142.54  
139.91  
129.67  
128.20  
126.11  
125.92  
121.67  
119.69  
113.04

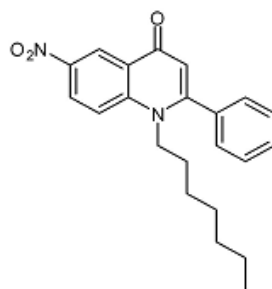

40.13  
39.00  
30.76  
29.67  
27.61  
25.99  
21.02  
13.79

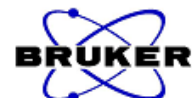

NAME 110727.204  
EXPNO 10  
PROCNO 1  
Date\_ 20110727  
Time 14.48  
INSTRUM spect  
PROBHD 5 mm PABBO BB-  
PULPROG zgpg30  
TD 65536  
SOLVENT DMSO  
NS 1024  
DS 4  
SWH 15000.000 Hz  
FIDRES 0.228882 Hz  
AQ 2.1845834 sec  
RG 2050  
DW 33.353 usec  
DE 10.00 usec  
TE 299.3 K  
D1 2.00000000 sec  
d11 0.03000000 sec  
DELTA 1.89999998 sec  
TD0 1

===== CHANNEL f1 =====  
NUC1 13C  
P1 10.00 usec  
PL1 -1.00 dB  
SFO1 62.9015280 MHz

===== CHANNEL f2 =====  
CPDPRG2 waltz16  
NUC2 1H  
PCPD2 70.00 usec  
PL12 15.00 dB  
PL13 15.00 dB  
PL2 -2.50 dB  
SFO2 250.1310005 MHz  
S1 32768  
SF 62.8952704 MHz  
WDW EM  
SSB 0  
LB 1.00 Hz  
GB 0  
PC 1.40

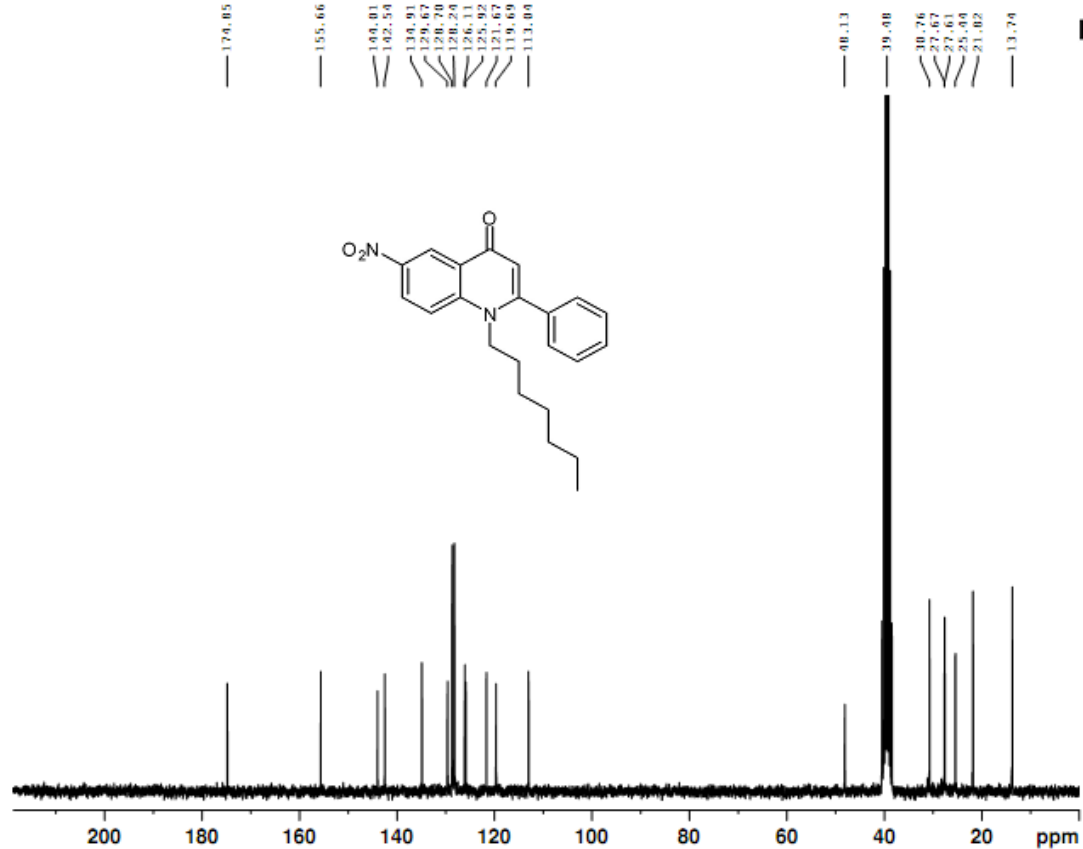

## 1-cyclohexane-6-nitro-4-oxo-2-phenylquinoline (7bf).

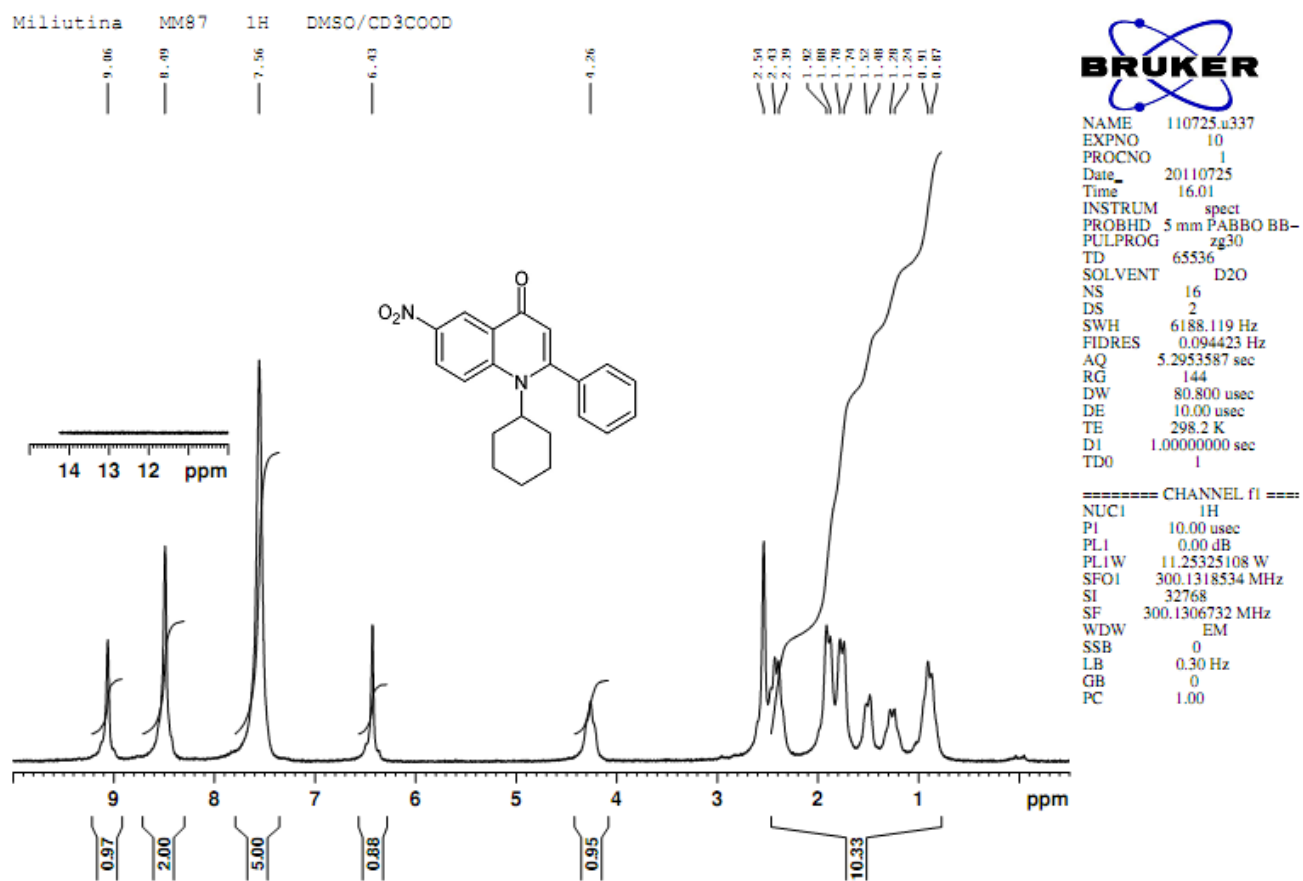

## 1-cyclohexane-6-nitro-4-oxo-2-phenylquinoline (7bf).

Millutina, MM-87, DMSO- $d_6$ /CF $_3$ COOD, 13C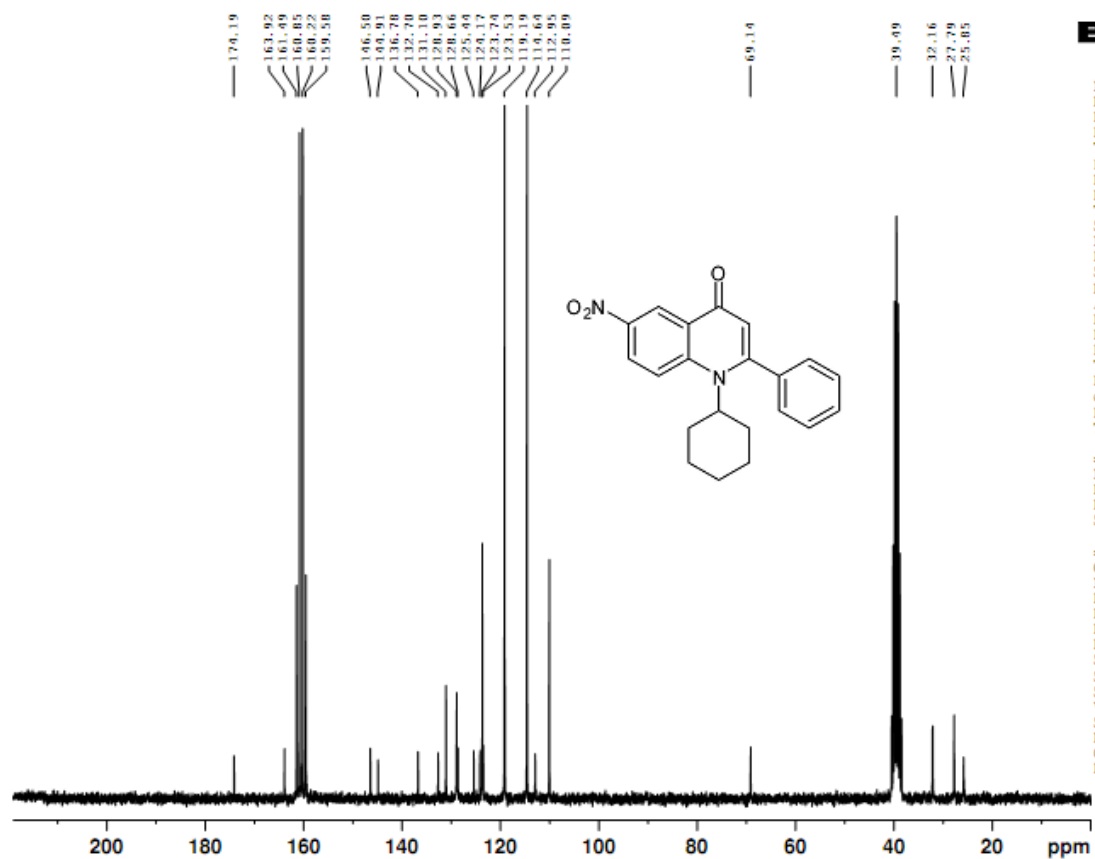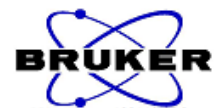

NAME 120113.206  
 EXPNO 10  
 PROCNO 1  
 Date\_ 20120113  
 Time 17.40  
 INSTRUM spect  
 PROBHD 5 mm QNP 1H/13  
 PULPROG zgpg30  
 TD 65536  
 SOLVENT D2O  
 NS 1024  
 DS 4  
 SWH 15000.000 Hz  
 FIDRES 0.228882 Hz  
 AQ 2.1845834 sec  
 RG 2050  
 DW 33.333 usec  
 DE 10.00 usec  
 TE 298.2 K  
 D1 2.0000000 sec  
 d11 0.0300000 sec  
 DELTA 1.89999998 sec  
 TD0 1

===== CHANNEL f1 =====  
 NUC1 13C  
 P1 10.20 usec  
 PL1 0.00 dB  
 SFO1 62.9015280 MHz

===== CHANNEL f2 =====  
 CPDPRG2 waltz16  
 NUC2 1H  
 PCPD2 70.00 usec  
 PL12 14.00 dB  
 PL13 14.00 dB  
 PL2 -3.00 dB  
 SFO2 250.1310005 MHz  
 SI 32768  
 SF 62.8952522 MHz  
 WDW EM  
 SSB 0  
 LB 1.00 Hz  
 GB 0  
 PC 1.40

## 1-Hexyl-6-nitro-2-phenylquinolin-4(1H)-one (7bg).

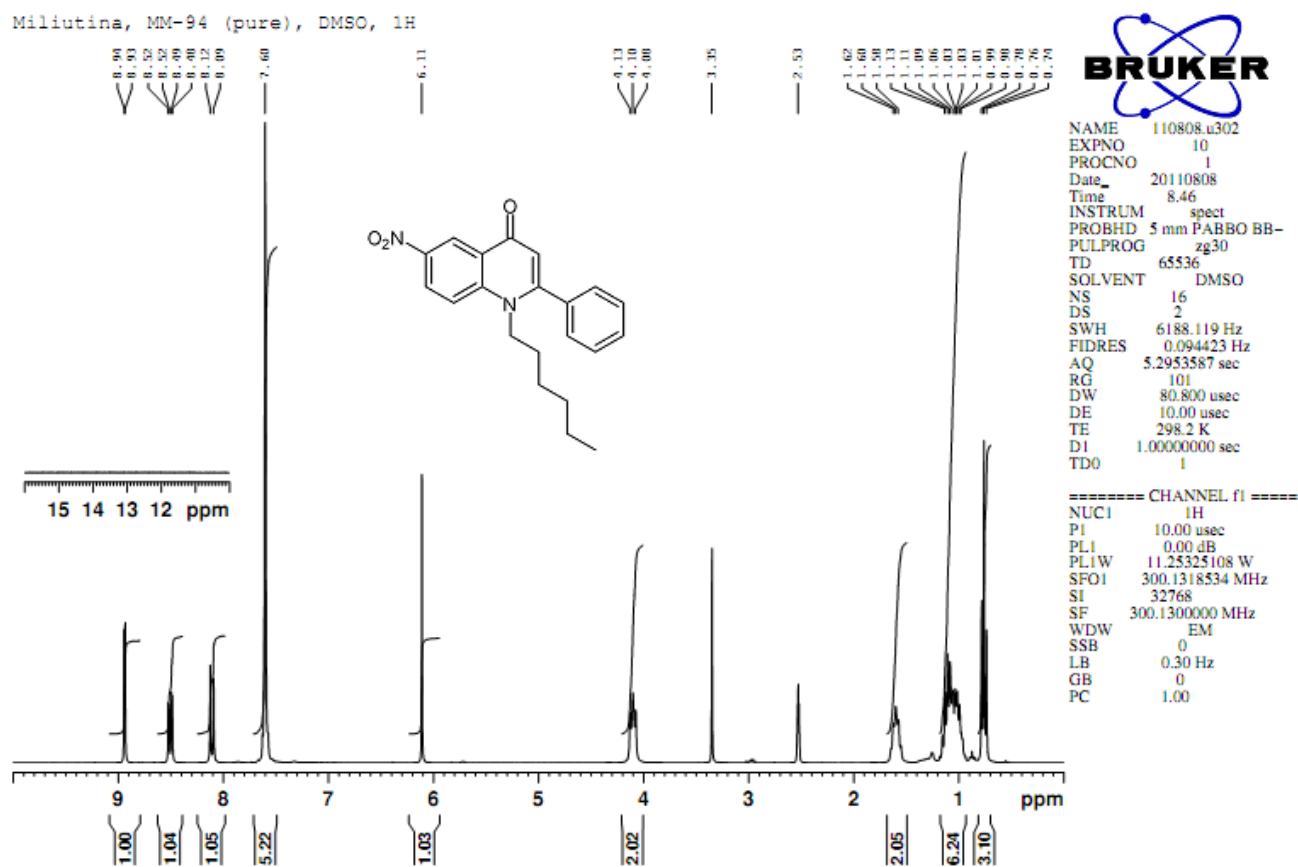

## 1-Hexyl-6-nitro-2-phenylquinolin-4(1H)-one (7bg).

Millutina, MM-94, DMSO, 13C

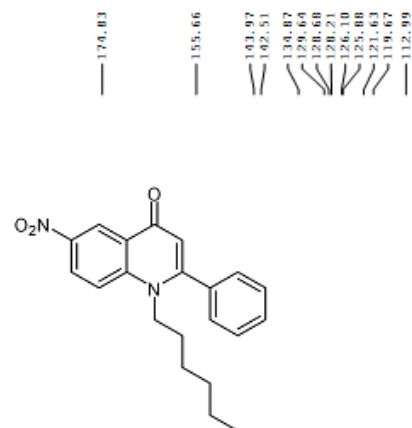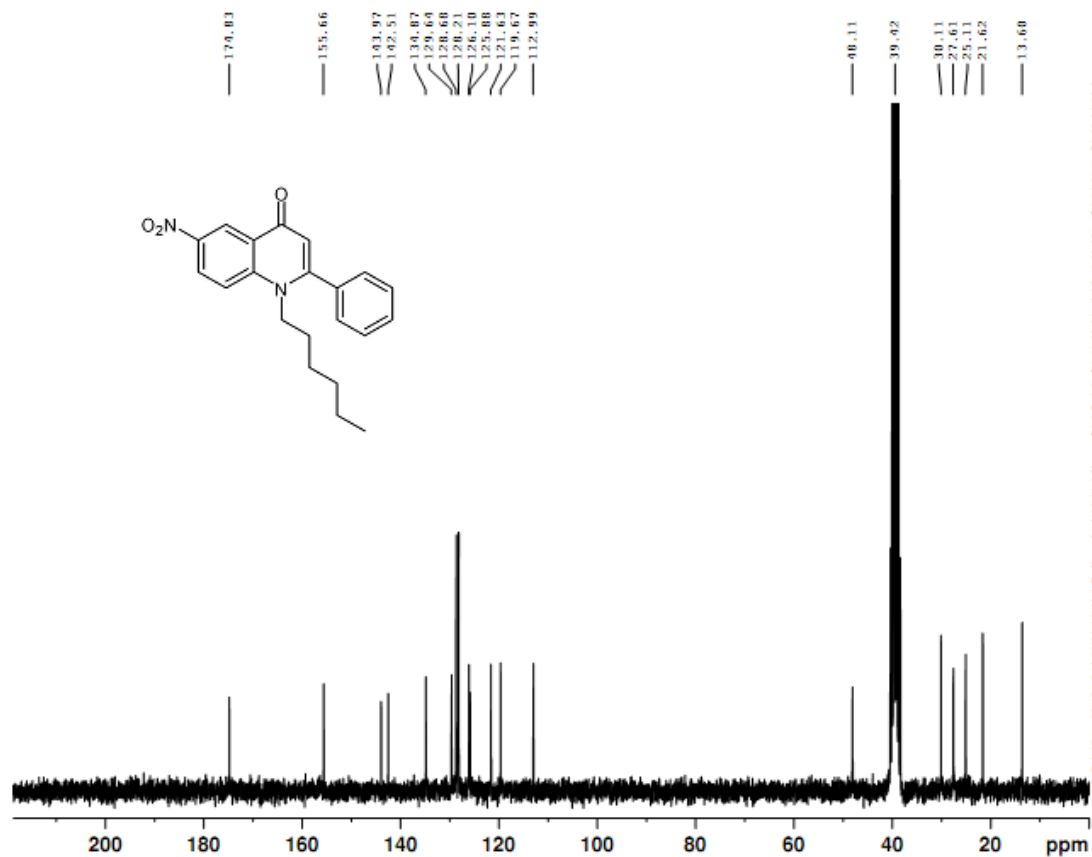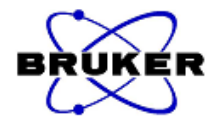

NAME 120113.207  
 EXPNO 10  
 PROCNO 1  
 Date\_ 20120113  
 Time 19.23  
 INSTRUM spect  
 PROBHD 5 mm QNP 1H/13  
 PULPROG zgpg30  
 TD 65536  
 SOLVENT DMSO  
 NS 1024  
 DS 4  
 SWH 15000.000 Hz  
 FIDRES 0.228882 Hz  
 AQ 2.1845834 sec  
 RG 2050  
 DW 33.333 usec  
 DE 10.00 usec  
 TE 298.2 K  
 D1 2.0000000 sec  
 d11 0.0300000 sec  
 DELTA 1.89999998 sec  
 TD0 1

===== CHANNEL f1 =====  
 NUC1 13C  
 P1 10.20 usec  
 PL1 0.00 dB  
 SFO1 62.9015280 MHz

===== CHANNEL f2 =====  
 CPDPRG2 waltz16  
 NUC2 1H  
 PCPD2 70.00 usec  
 PL12 14.00 dB  
 PL13 14.00 dB  
 PL2 -3.00 dB  
 SFO2 250.1310005 MHz  
 SI 32768  
 SF 62.8952704 MHz  
 WDW EM  
 SSB 0  
 LB 1.00 Hz  
 GB 0  
 PC 1.40

## 1-(3,5-dimethoxybenzen)-6-nitro-4-oxo-2-phenylquinoline (7bh).

Miliutina, mm-86, DMSO/CDCl3 1:5, 1H

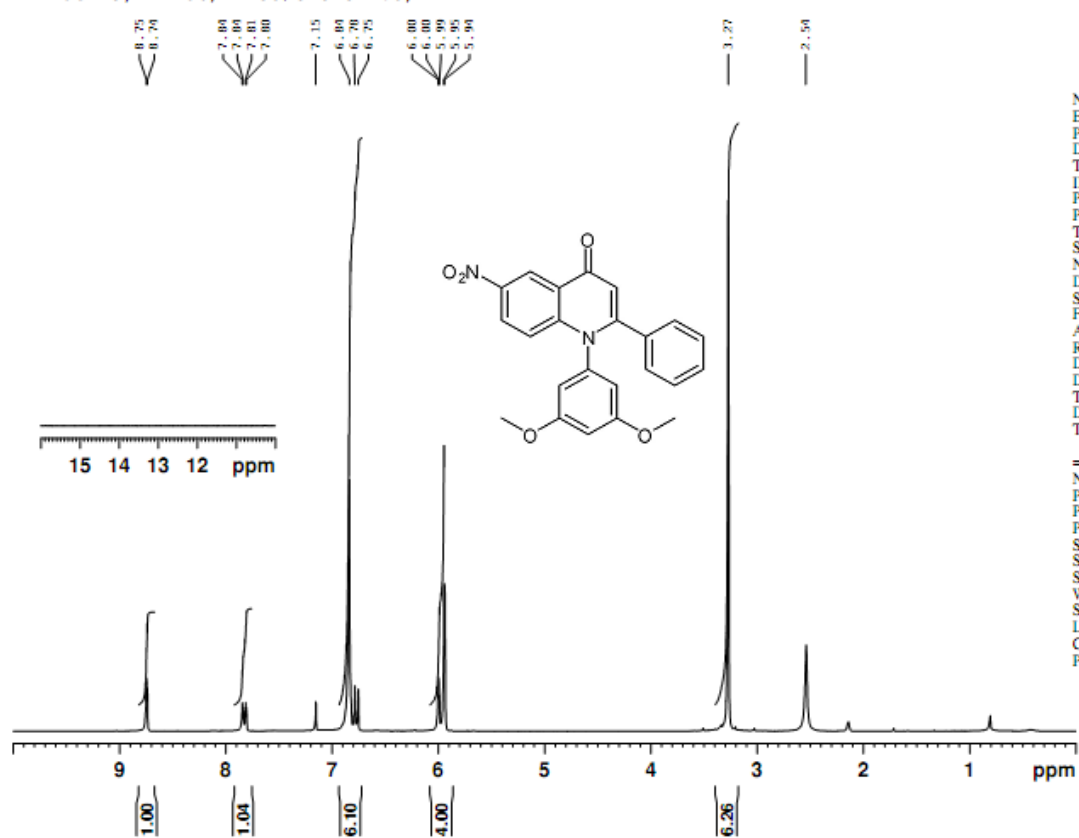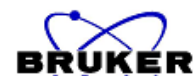

NAME 120113.u325  
 EXPNO 10  
 PROCNO 1  
 Date\_ 20120115  
 Time 18.27  
 INSTRUM spect  
 PROBHD 5 mm PABBO BB-  
 PULPROG zg30  
 TD 65536  
 SOLVENT CDCl3  
 NS 16  
 DS 2  
 SWH 12019.230 Hz  
 FIDRES 0.183399 Hz  
 AQ 2.7263477 sec  
 RG 181  
 DW 41.600 usec  
 DE 10.00 usec  
 TE 298.2 K  
 D1 1.00000000 sec  
 TD0 1

===== CHANNEL f1 =====  
 NUC1 1H  
 P1 10.00 usec  
 PL1 0.00 dB  
 PL1W 11.25325108 W  
 SFO1 300.1318534 MHz  
 SI 32768  
 SF 300.1315388 MHz  
 WDW EM  
 SSB 0  
 LB 0.30 Hz  
 GB 0  
 PC 1.00

## 1-(3,5-dimethoxybenzen)-6-nitro-4-oxo-2-phenylquinoline (7bh).

Miliutina, mm-86, DMSO/CDCl3 1:5, 13C

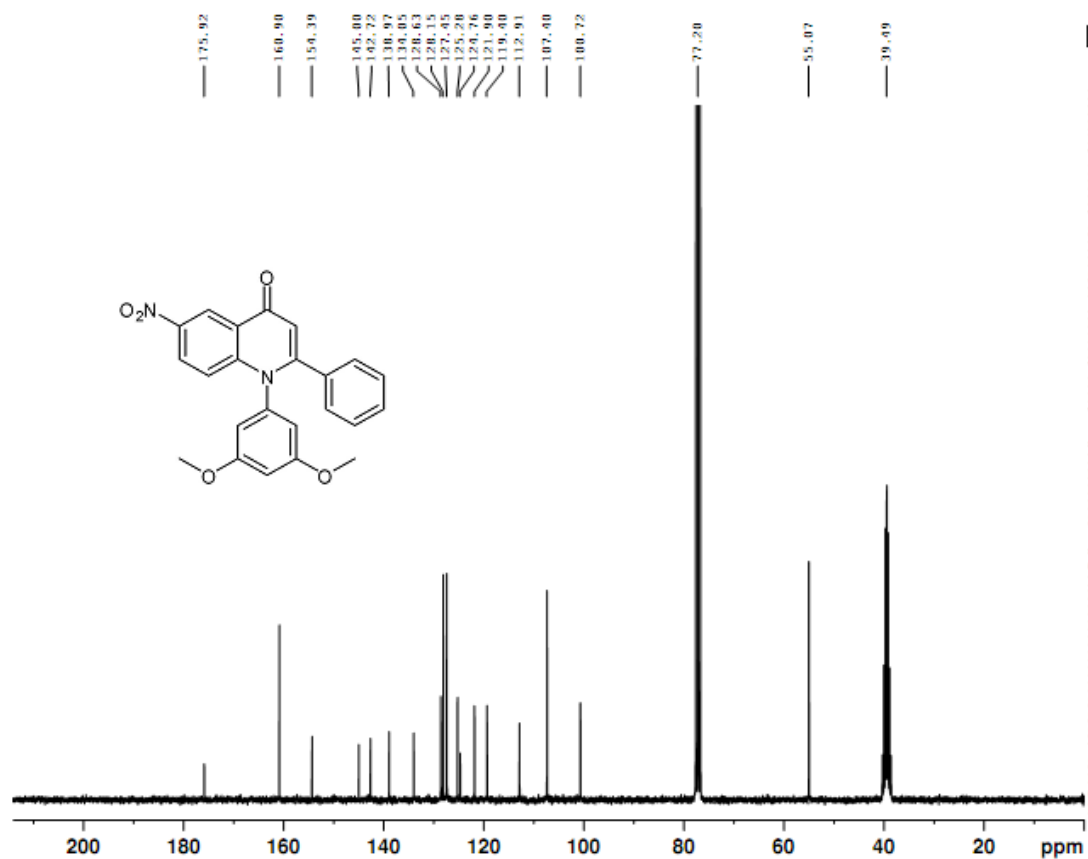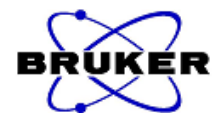

NAME 120113.u325  
 EXPNO 11  
 PROCNO 1  
 Date\_ 20120115  
 Time 20.41  
 INSTRUM spect  
 PROBHD 5 mm PABBO BB-  
 PULPROG zgpg30  
 TD 65536  
 SOLVENT CDCl3  
 NS 2048  
 DS 4  
 SWH 18028.846 Hz  
 FIDRES 0.275098 Hz  
 AQ 1.8175818 sec  
 RG 2050  
 DW 27.733 usec  
 DE 10.00 usec  
 TE 298.2 K  
 D1 2.0000000 sec  
 D11 0.0300000 sec  
 TD0 1

===== CHANNEL f1 =====  
 NUC1 13C  
 P1 10.00 usec  
 PL1 -0.50 dB  
 PL1W 33.25691986 W  
 SFO1 75.4752953 MHz

===== CHANNEL f2 =====  
 CPDPRG2 waltz16  
 NUC2 1H  
 PCPD2 72.00 usec  
 PL2 0.00 dB  
 PL12 17.00 dB  
 PL13 17.00 dB  
 PL2W 11.25325108 W  
 PL12W 0.22453187 W  
 PL13W 0.22453187 W  
 SFO2 300.1312005 MHz  
 SI 32768  
 SF 75.4681550 MHz  
 WDW EM  
 SSB 0  
 LB 1.00 Hz  
 GB 0  
 PC 1.40

6-Nitro-1-(3,4-dimethoxyphenethyl)-2-*p*-tolyl-4-quinolone (7ca).Ivanov, AI-42, CDCl<sub>3</sub>, 1H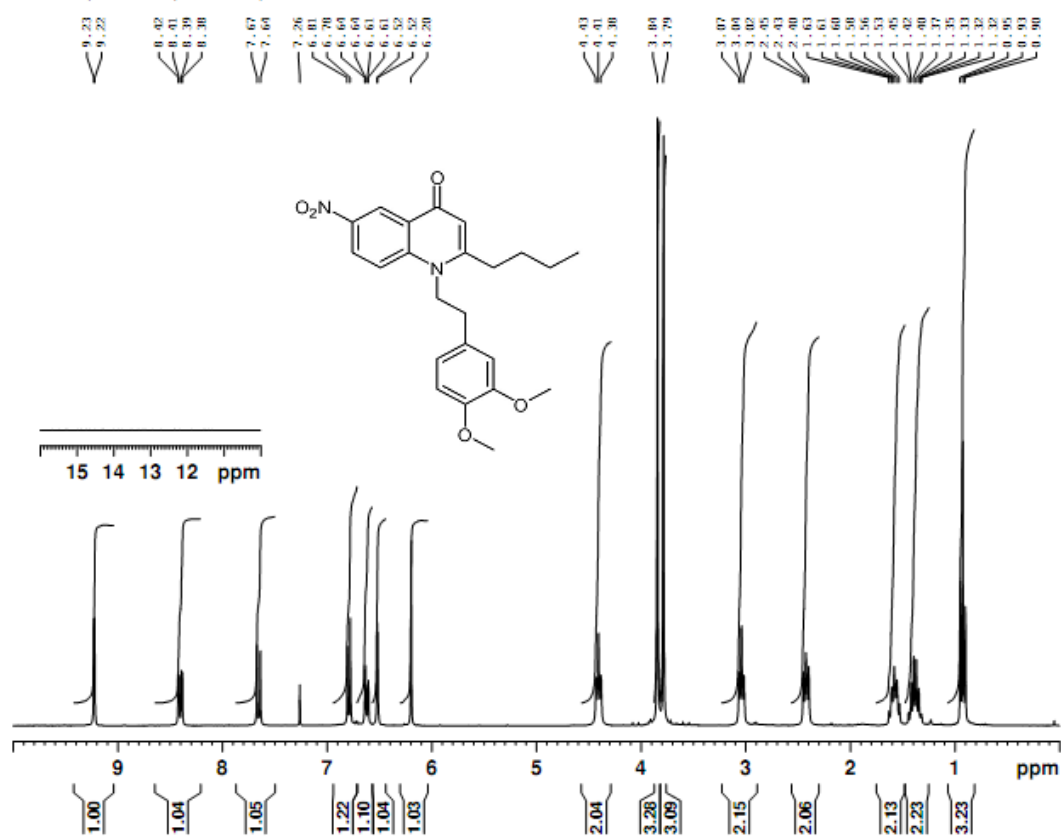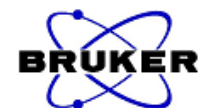

NAME 120207.u302  
 EXPNO 10  
 PROCNO 1  
 Date\_ 20120207  
 Time 8.42  
 INSTRUM spect  
 PROBHD 5 mm PABBO BB-  
 PULPROG zg30  
 TD 65536  
 SOLVENT CDCl<sub>3</sub>  
 NS 16  
 DS 2  
 SWH 6188.119 Hz  
 FIDRES 0.094423 Hz  
 AQ 5.2953587 sec  
 RG 50.8  
 DW 80.800 usec  
 DE 10.00 usec  
 TE 298.2 K  
 D1 1.0000000 sec  
 TD0 1

===== CHANNEL f1 =====  
 NUC1 1H  
 P1 10.00 usec  
 PL1 0.00 dB  
 PL1W 11.25325108 W  
 SFO1 300.1318534 MHz  
 SI 32768  
 SF 300.1300086 MHz  
 WDW EM  
 SSB 0  
 LB 0.30 Hz  
 GB 0  
 PC 1.00



## 6-Nitro-1-(3,4-dimethoxyphenethyl)-2-p-tyl-4-quinolone (7ca).

Ivanov, AI-42, CDCl<sub>3</sub>, 13C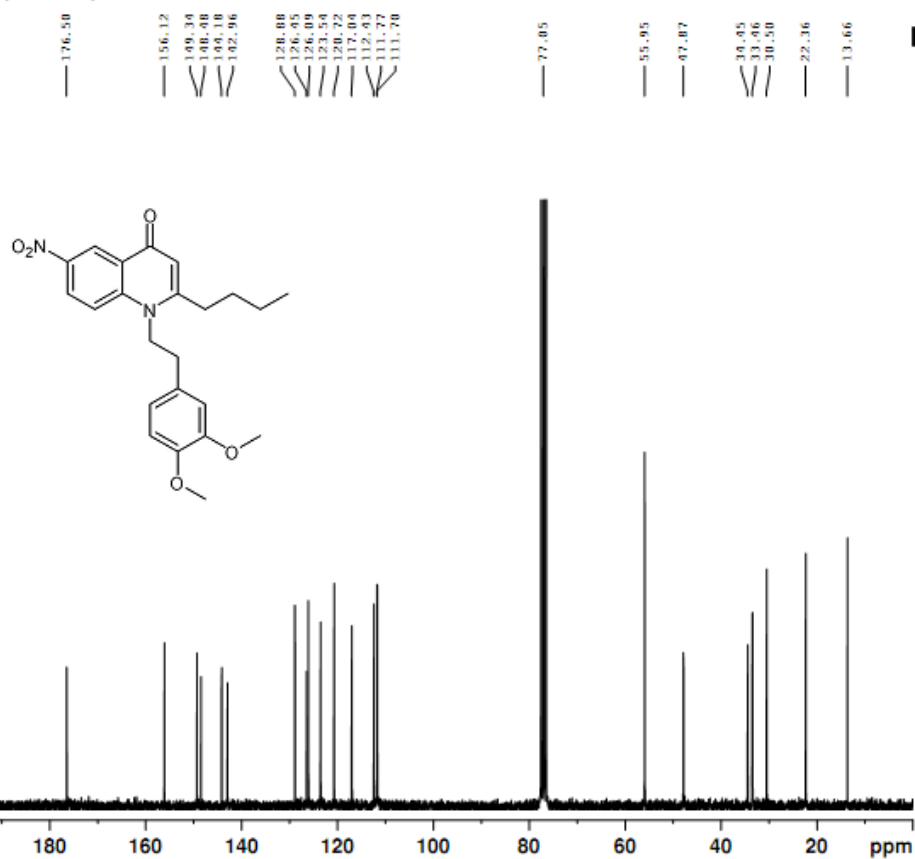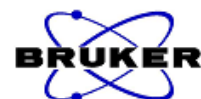

NAME 120207.204  
 EXPNO 10  
 PROCNO 1  
 Date\_ 20120207  
 Time 15.21  
 INSTRUM spect  
 PROBHD 5 mm QNP 1H/13  
 PULPROG zgpg30  
 TD 65536  
 SOLVENT CDCl<sub>3</sub>  
 NS 1024  
 DS 4  
 SWH 15000.000 Hz  
 FIDRES 0.228882 Hz  
 AQ 2.1845834 sec  
 RG 2050  
 DW 33.333 usec  
 DE 10.00 usec  
 TE 298.2 K  
 D1 2.0000000 sec  
 d11 0.0300000 sec  
 DELTA 1.89999998 sec  
 TDO 1

===== CHANNEL f1 =====  
 NUC1 13C  
 P1 10.20 usec  
 PL1 0.00 dB  
 SFO1 62.9015280 MHz

===== CHANNEL f2 =====  
 CPDPRG2 waltz16  
 NUC2 1H  
 PCPD2 70.00 usec  
 PL12 14.00 dB  
 PL13 14.00 dB  
 PL2 -3.00 dB  
 SFO2 250.1310005 MHz  
 SI 32768  
 SF 62.8952390 MHz  
 WDW EM  
 SSB 0  
 LB 1.00 Hz  
 GB 0  
 PC 1.40

## 2-Butyl-1-(3,5-dimethoxyphenyl)-6-nitroquinolin-4(1H)-one (7cb).

Miliutina, MM-93, DMSO, 1H

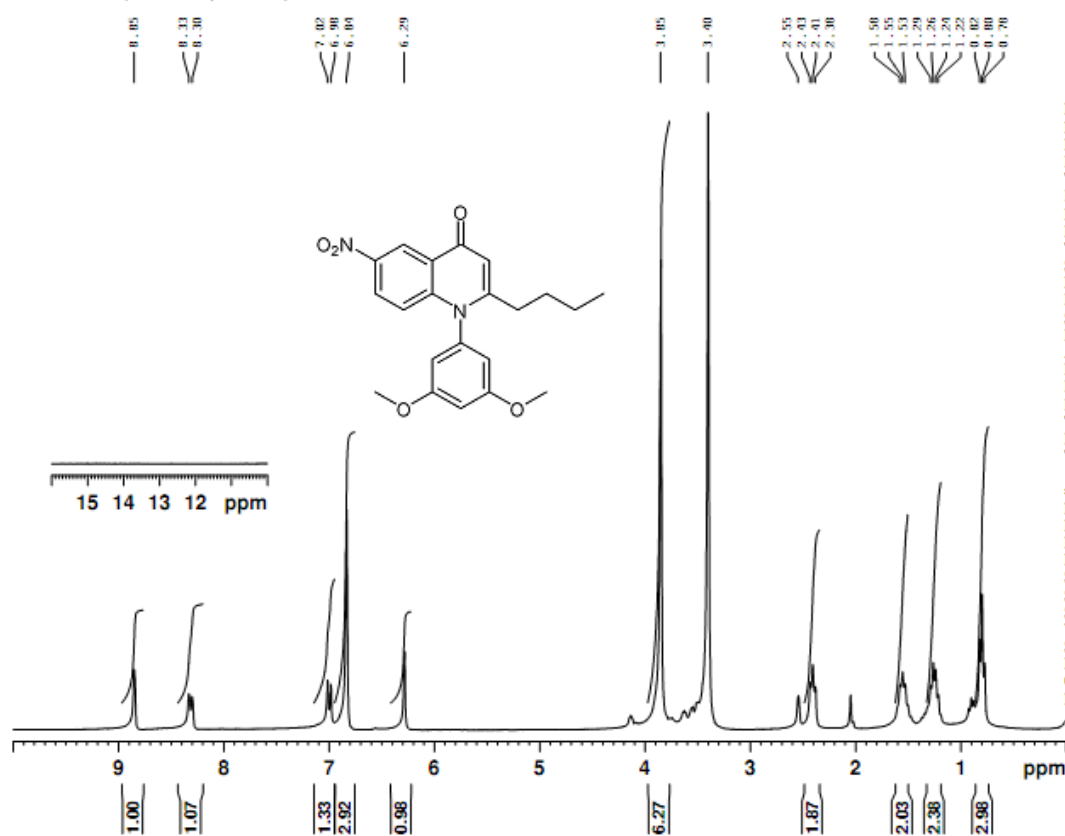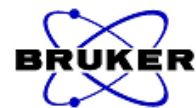

NAME 110804.u301  
 EXPNO 10  
 PROCNO 1  
 Date\_ 20110804  
 Time 9.07  
 INSTRUM spect  
 PROBHD 5 mm PABBO BB-  
 PULPROG zg30  
 TD 65536  
 SOLVENT DMSO  
 NS 16  
 DS 2  
 SWH 6188.119 Hz  
 FIDRES 0.094423 Hz  
 AQ 5.2953587 sec  
 RG 64  
 DW 80.800 usec  
 DE 10.00 usec  
 TE 298.2 K  
 D1 1.00000000 sec  
 TD0 1

===== CHANNEL f1 =====  
 NUC1 1H  
 P1 10.00 usec  
 PL1 0.00 dB  
 PL1W 11.25325108 W  
 SFO1 300.1318534 MHz  
 S1 32768  
 SF 300.1299991 MHz  
 WDW EM  
 SSB 0  
 LB 0.30 Hz  
 GB 0  
 PC 1.00

## 2-Butyl-1-(3,5-dimethoxyphenyl)-6-nitroquinolin-4(1H)-one (7cb).

Miliutina, MM-93, DMSO, 13C

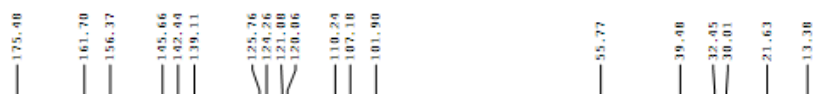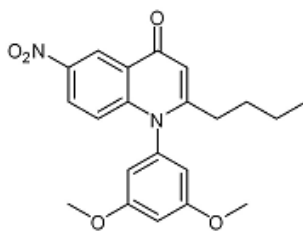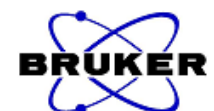

NAME 110809.u316  
EXPNO 10  
PROCNO 1  
Date\_ 20110809  
Time 23.34  
INSTRUM spect  
PROBHD 5 mm PABBO BB-  
PULPROG zgpg30  
TD 65536  
SOLVENT DMSO  
NS 1024  
DS 4  
SWH 18028.846 Hz  
FIDRES 0.275098 Hz  
AQ 1.8175818 sec  
RG 2050  
DW 27.733 usec  
DE 10.00 usec  
TE 298.2 K  
D1 2.00000000 sec  
D11 0.03000000 sec  
TD0 1

===== CHANNEL f1 =====  
NUC1 13C  
P1 10.00 usec  
PL1 -0.50 dB  
PL1W 33.25691986 W  
SFO1 75.4752953 MHz

===== CHANNEL f2 =====  
CPDPRG2 waltz16  
NUC2 1H  
PCPD2 72.00 usec  
PL2 0.00 dB  
PL12 17.00 dB  
PL13 17.00 dB  
PL2W 11.25325108 W  
PL12W 0.22453187 W  
PL13W 0.22453187 W  
SFO2 300.1312005 MHz  
SI 32768  
SF 75.4677864 MHz  
WDW EM  
SSB 0  
LB 1.00 Hz  
GB 0  
PC 1.40

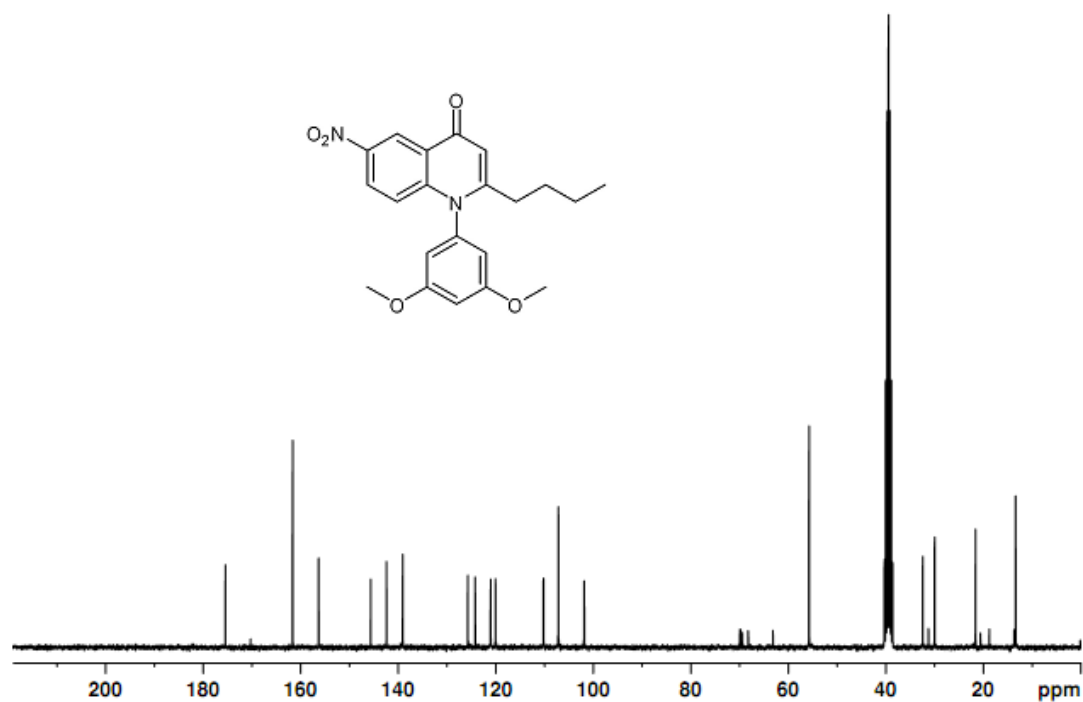

## 2-Butyl-1-(4-methoxyphenyl)-6-nitroquinolin-4(1H)-one (7cc).

Miliutina, MM-98, DMSO, 1H

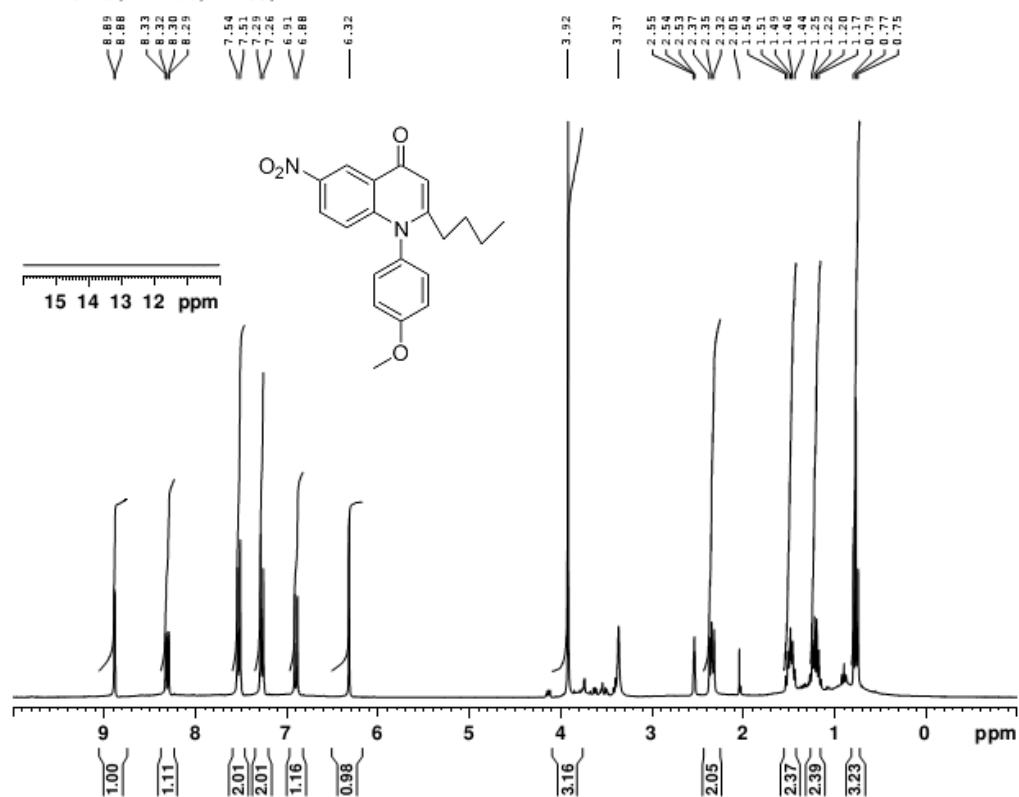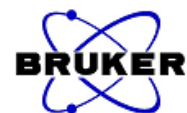

NAME 110816.u302  
 EXPNO 10  
 PROCNO 1  
 Date\_ 20110816  
 Time 9.59  
 INSTRUM spect  
 PROBHD 5 mm PABBO BB-  
 PULPROG zg30  
 TD 65536  
 SOLVENT DMSO  
 NS 16  
 DS 2  
 SWH 6188.119 Hz  
 FIDRES 0.094423 Hz  
 AQ 5.2953587 sec  
 RG 90.5  
 DW 80.800 usec  
 DE 10.00 usec  
 TE 298.2 K  
 D1 1.00000000 sec  
 TD0 1

==== CHANNEL f1 ====  
 NUC1 1H  
 P1 10.00 usec  
 PL1 0.00 dB  
 PL1W 11.25325108 W  
 SFO1 300.1318534 MHz  
 S1 32768  
 SF 300.1299964 MHz  
 WDW EM  
 SSB 0  
 LB 0.30 Hz  
 GB 0  
 PC 1.00

## 2-Butyl-1-(4-methoxyphenyl)-6-nitroquinolin-4(1H)-one (7cc).

Miliutina, MM-98, DMSO, 13C

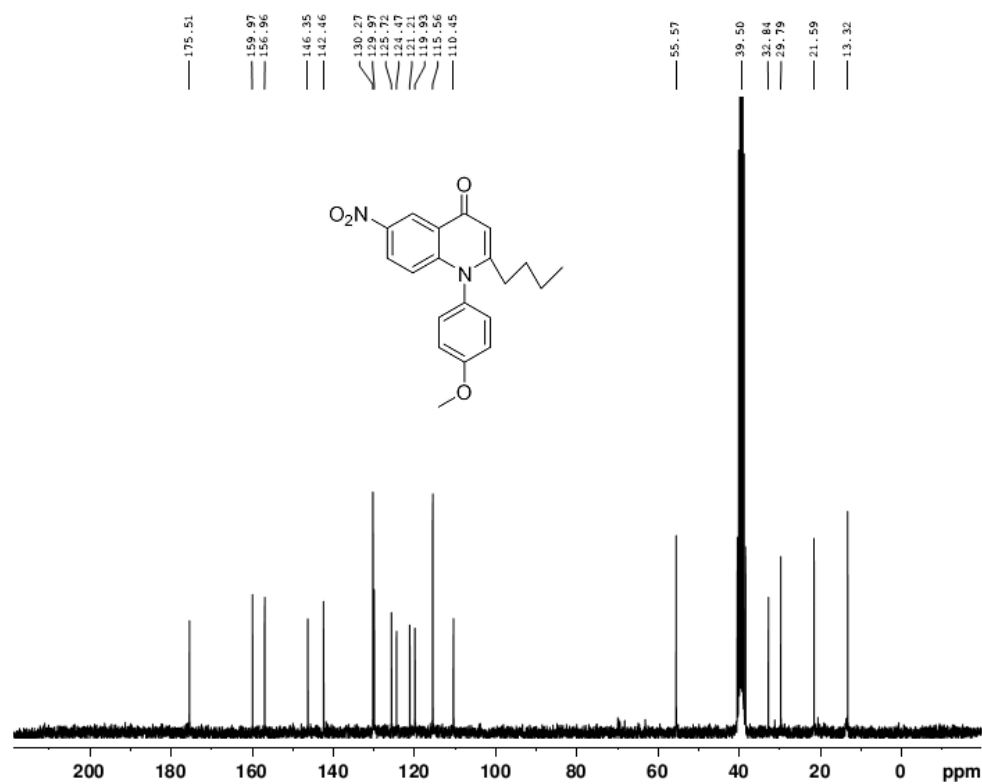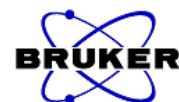

NAME 110818202  
 EXPNO 10  
 PROCNO 1  
 Date\_ 20110818  
 Time 12.18  
 INSTRUM spect  
 PROBHD 5 mm PABBO BB-  
 PULPROG zgpg30  
 TD 65536  
 SOLVENT DMSO  
 NS 1024  
 DS 4  
 SWH 15000.000 Hz  
 FIDRES 0.228882 Hz  
 AQ 2.1845834 sec  
 RG 1620  
 DW 33.333 usec  
 DE 10.00 usec  
 TE 297.9 K  
 DI 2.00000000 sec  
 dI1 0.03000000 sec  
 DELTA 1.89999998 sec  
 TD0 1

===== CHANNEL f1 =====  
 NUC1 13C  
 P1 10.00 usec  
 PL1 -1.00 dB  
 SFO1 62.9015280 MHz

===== CHANNEL f2 =====  
 CPDPRG2 waltz16  
 NUC2 1H  
 PCPD2 70.00 usec  
 PL12 15.00 dB  
 PL13 15.00 dB  
 PL2 -2.50 dB  
 SFO2 250.1310005 MHz  
 SI 32768  
 SF 62.8952692 MHz  
 WDW EM  
 SSB 0  
 LB 1.00 Hz  
 GB 0  
 PC 1.40

2-Butyl-1-(4-*tert*-butylphenyl)-6-nitroquinolin-4(1*H*)-one (7cd).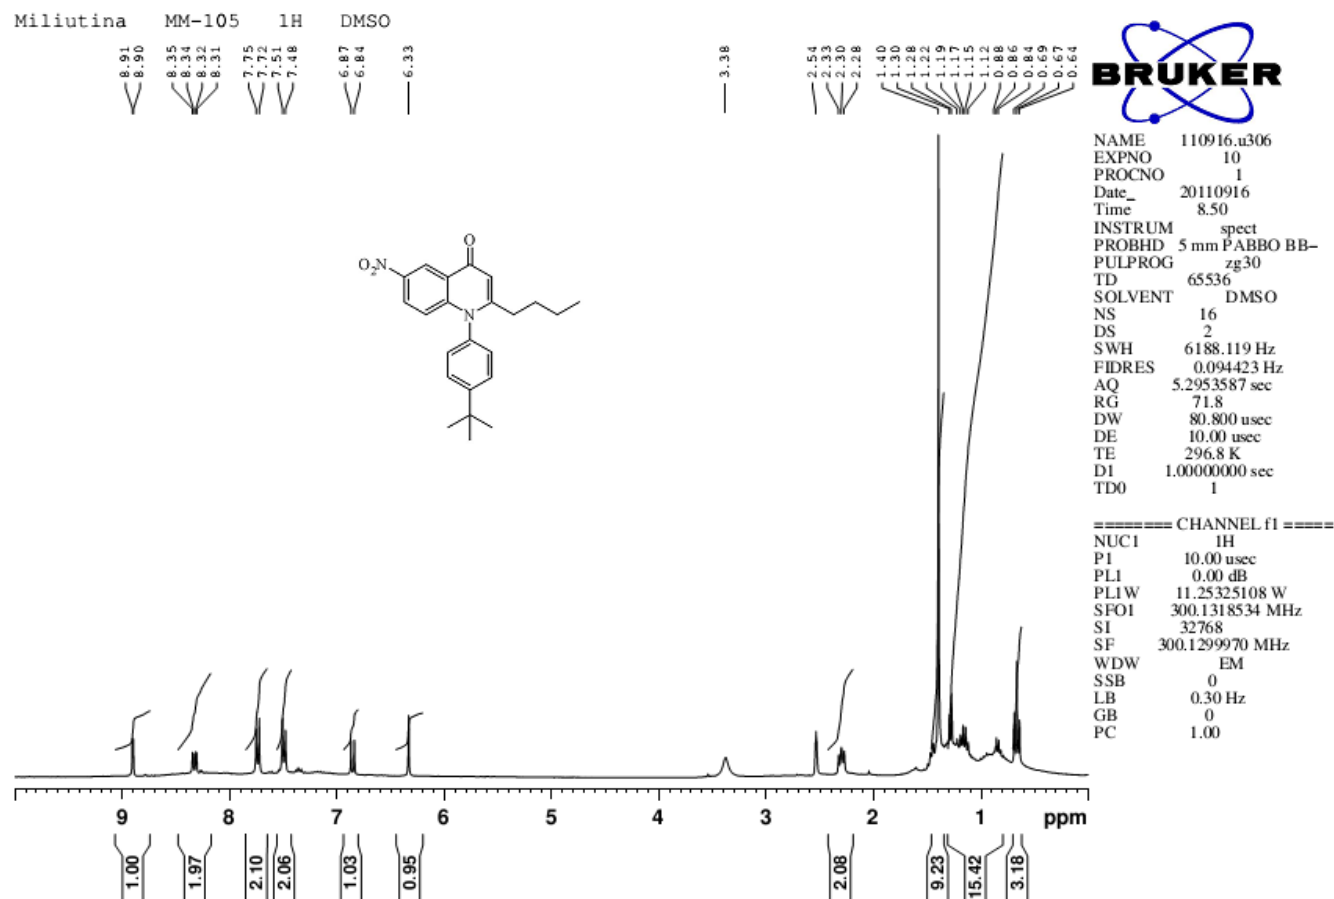

2-Butyl-1-(4-*tert*-butylphenyl)-6-nitroquinolin-4(1*H*)-one (7cd).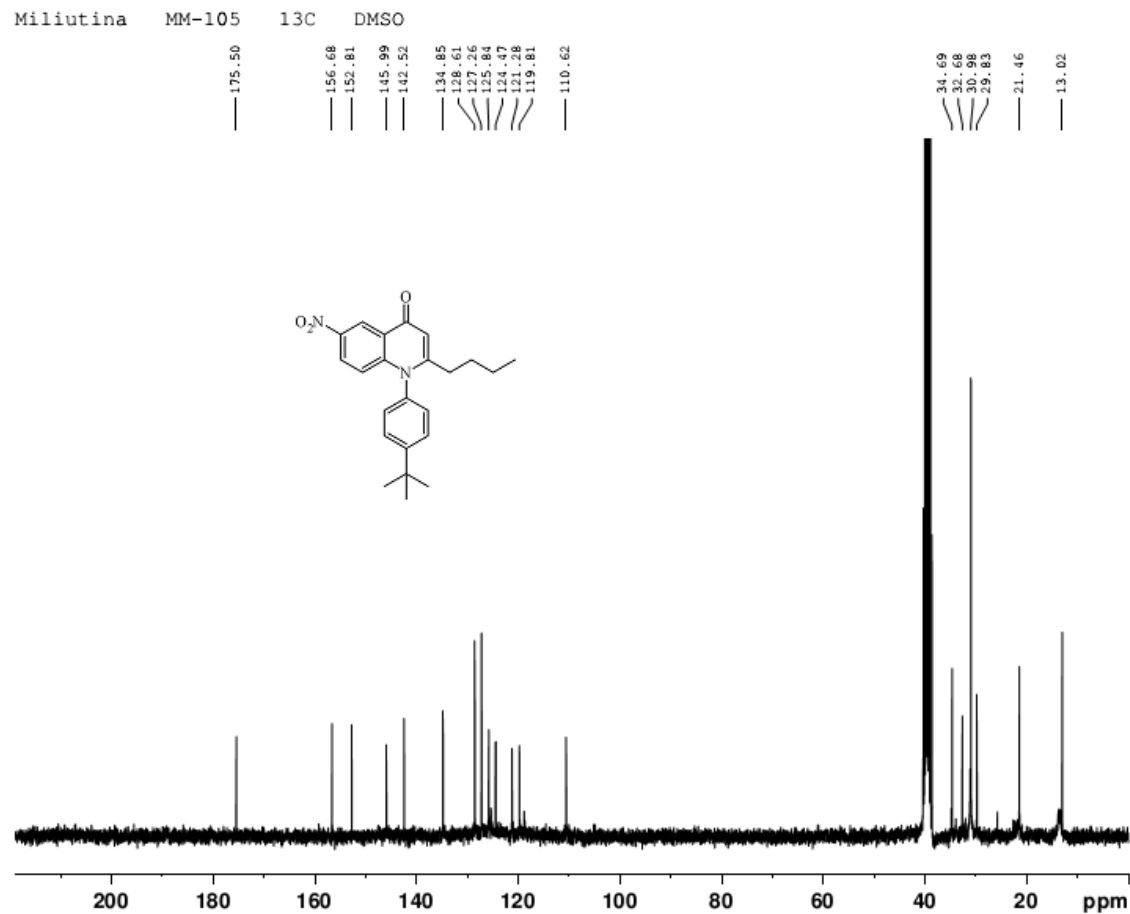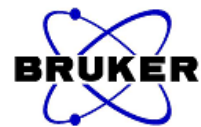

NAME 110916.a306  
 EXPNO 12  
 PROCNO 1  
 Date\_ 20110917  
 Time 2.19  
 INSTRUM spect  
 PROBHD 5 mm PABBO BB-  
 PULPROG zgpg30  
 TD 65536  
 SOLVENT DMSO  
 NS 1024  
 DS 4  
 SWH 18028.846 Hz  
 FIDRES 0.275098 Hz  
 AQ 1.8175818 sec  
 RG 2050  
 DW 27.733 usec  
 DE 10.00 usec  
 TE 297.7 K  
 D1 2.0000000 sec  
 D11 0.03000000 sec  
 TDO 1

===== CHANNEL f1 =====

NUC1 13C  
 P1 10.00 usec  
 PL1 -0.50 dB  
 PL1W 33.25691986 W  
 SFO1 75.4752953 MHz

===== CHANNEL f2 =====

CPDPRG2 waltz16  
 NUC2 1H  
 PCPD2 72.00 usec  
 PL2 0.00 dB  
 PL12 17.00 dB  
 PL13 17.00 dB  
 PL2W 11.25325108 W  
 PL12W 0.22453187 W  
 PL13W 0.22453187 W  
 SFO2 300.1312005 MHz  
 S1 32768  
 SF 75.4677867 MHz  
 WDW EM  
 SSB 0  
 LB 1.00 Hz  
 GB 0  
 PC 1.40

## 6-Nitro-(3,4-dimethoxyphenethyl)-2-pentyl-4-quinolone (7da).

Ivanov, AI-44, CDCl<sub>3</sub>, 1H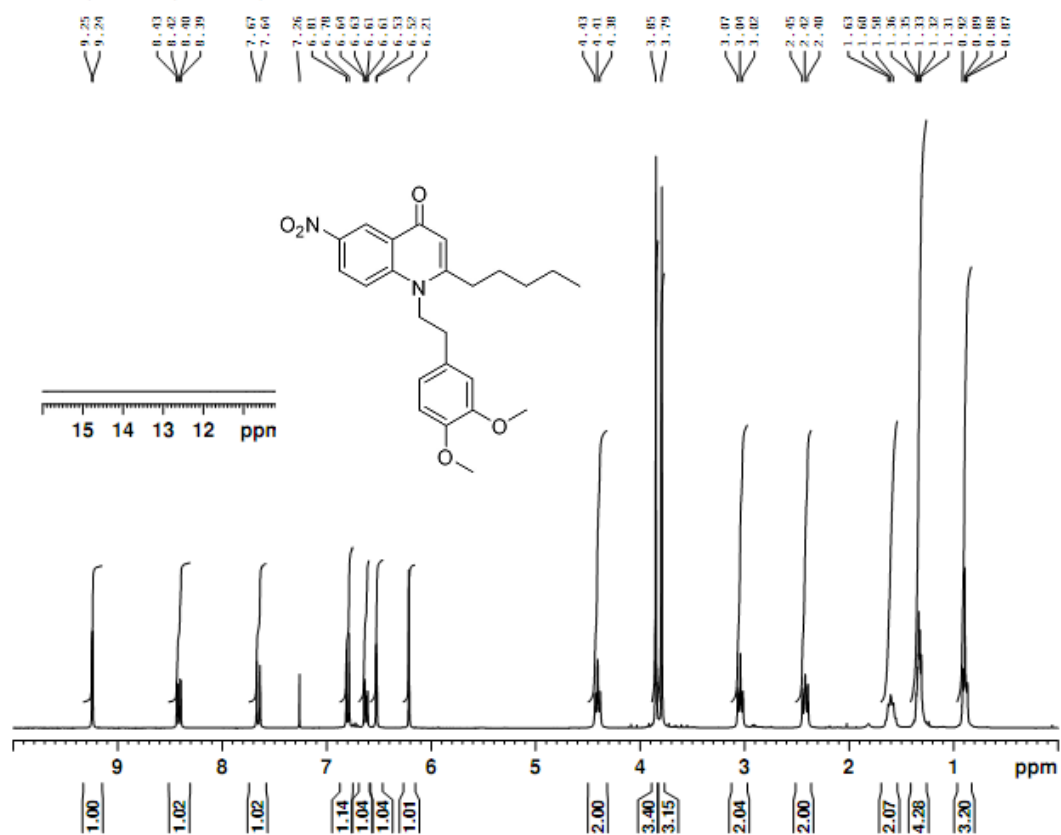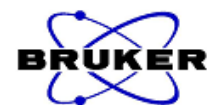

NAME 120208 u303  
 EXPNO 10  
 PROCNO 1  
 Date\_ 20120208  
 Time 7.51  
 INSTRUM spect  
 PROBHD 5 mm PABBO BB-  
 PULPROG zg30  
 TD 65536  
 SOLVENT CDCl3  
 NS 16  
 DS 2  
 SWH 6188.119 Hz  
 FIDRES 0.094423 Hz  
 AQ 5.2953587 sec  
 RG 50.8  
 DW 80.800 usec  
 DE 10.00 usec  
 TE 298.2 K  
 D1 1.00000000 sec  
 TD0 1

===== CHANNEL f1 =====  
 NUC1 1H  
 P1 10.00 usec  
 PL1 0.00 dB  
 PL1W 11.25325108 W  
 SFO1 300.1318534 MHz  
 SI 32768  
 SF 300.1300083 MHz  
 WDW EM  
 SSB 0  
 LB 0.30 Hz  
 GB 0  
 PC 1.00



## 6-Nitro-(3,4-dimethoxyphenethyl)-2-pentyl-4-quinolone (7da).

Ivanov, AI-44, CDCl<sub>3</sub>, 13C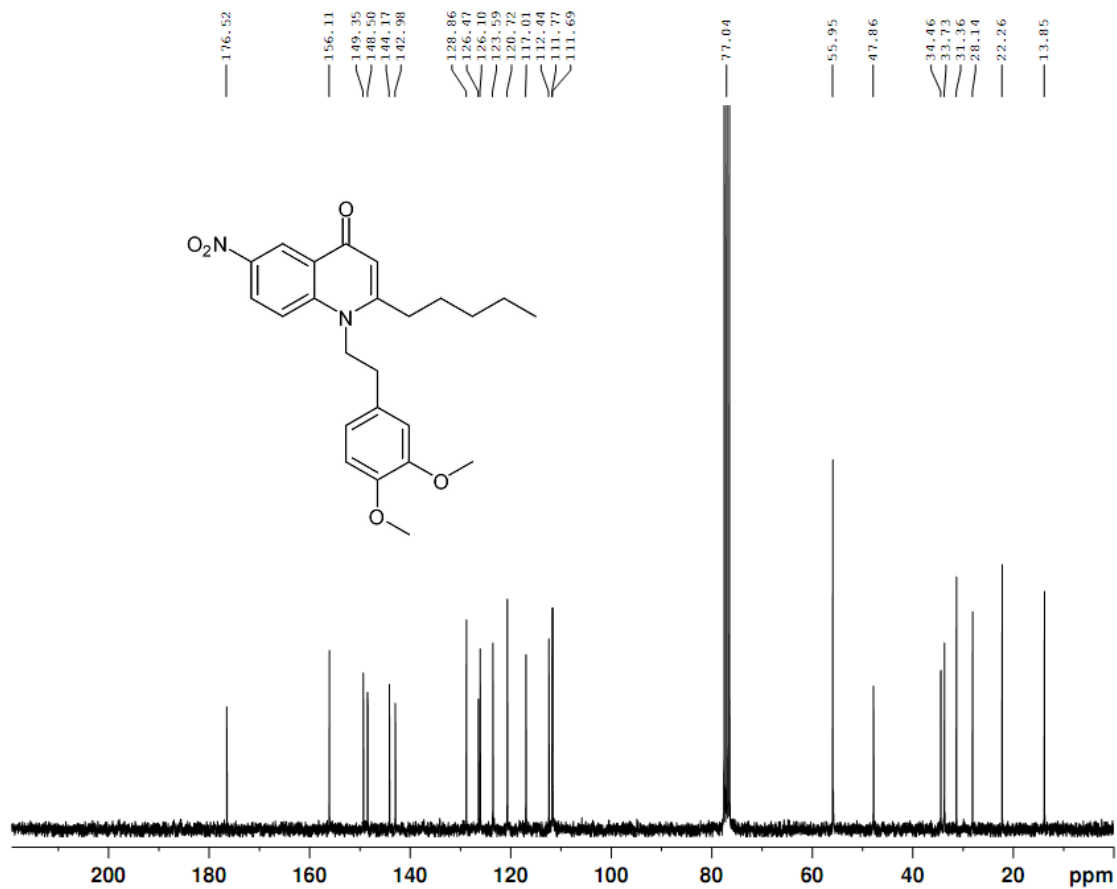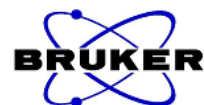

NAME 120208.203  
 EXPNO 10  
 PROCNO 1  
 Date\_ 20120208  
 Time 12.38  
 INSTRUM spect  
 PROBHD 5 mm QNP 1H/13  
 PULPROG zgpg30  
 TD 65536  
 SOLVENT CDCl3  
 NS 1024  
 DS 4  
 SWH 15000.000 Hz  
 FIDRES 0.228882 Hz  
 AQ 2.1845834 sec  
 RG 2050  
 DW 33.333 usec  
 DE 10.00 usec  
 TE 298.2 K  
 D1 2.00000000 sec  
 d11 0.03000000 sec  
 DELTA 1.89999998 sec  
 TDO 1

===== CHANNEL f1 =====  
 NUC1 13C  
 P1 10.20 usec  
 PL1 0.00 dB  
 SFO1 62.9015280 MHz

===== CHANNEL f2 =====  
 CPDPRG2 waltz16  
 NUC2 1H  
 PCPD2 70.00 usec  
 PL12 14.00 dB  
 PL13 14.00 dB  
 PL2 -3.00 dB  
 SFO2 250.1310005 MHz  
 SI 32768  
 SF 62.8952390 MHz  
 WDW EM  
 SSB 0  
 LB 1.00 Hz  
 GB 0  
 PC 1.40

## 1-(4-Methoxybenzyl)-6-nitro-2-pentylquinolin-4(1H)-one (7db).

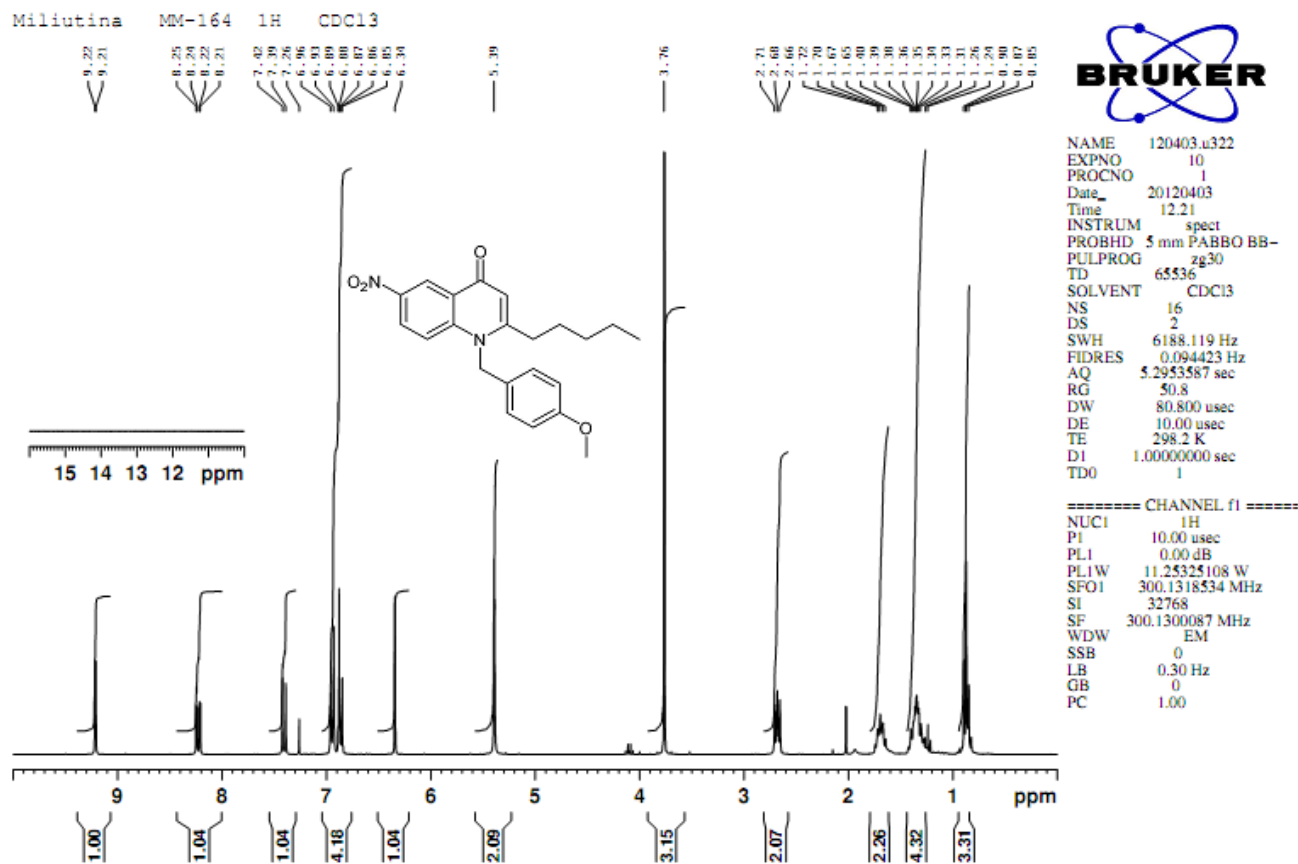

## 1-(4-Methoxybenzyl)-6-nitro-2-pentylquinolin-4(1H)-one (7db).

Miliutina MM-164 13C CDCl3

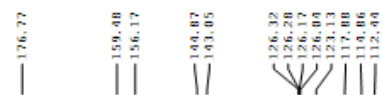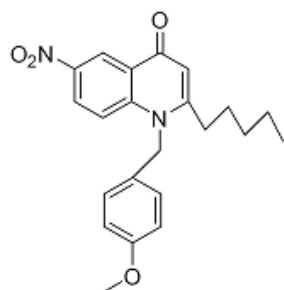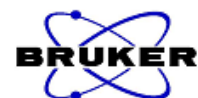

NAME 120403.u322  
 EXPNO 11  
 PROCNO 1  
 Date\_ 20120404  
 Time 5.44  
 INSTRUM spect  
 PROBHD 5 mm PABBO BB-  
 PULPROG zgpg30  
 TD 65536  
 SOLVENT CDCl3  
 NS 1024  
 DS 4  
 SWH 18028.846 Hz  
 FIDRES 0.275398 Hz  
 AQ 1.8175818 sec  
 RG 2040  
 DW 27.733 usec  
 DE 10.00 usec  
 TE 298.2 K  
 D1 2.0000000 sec  
 D11 0.0500000 sec  
 TD0 1

----- CHANNEL f1 -----  
 NUC1 13C  
 P1 10.00 usec  
 PL1 -0.50 dB  
 PL1W 33.25591986 W  
 SFO1 75.4752953 MHz

----- CHANNEL f2 -----  
 CPDPRG2 waltz16  
 NUC2 1H  
 PCPD2 72.00 usec  
 PL2 0.00 dB  
 PL12 17.00 dB  
 PL13 17.00 dB  
 PL2W 11.25325108 W  
 PL12W 0.22453187 W  
 PL13W 0.22453187 W  
 SFO2 300.1312005 MHz  
 SI 32769  
 SF 75.4677437 MHz  
 WDW EM  
 SSB 0  
 LB 1.00 Hz  
 GB 0  
 PC 1.40

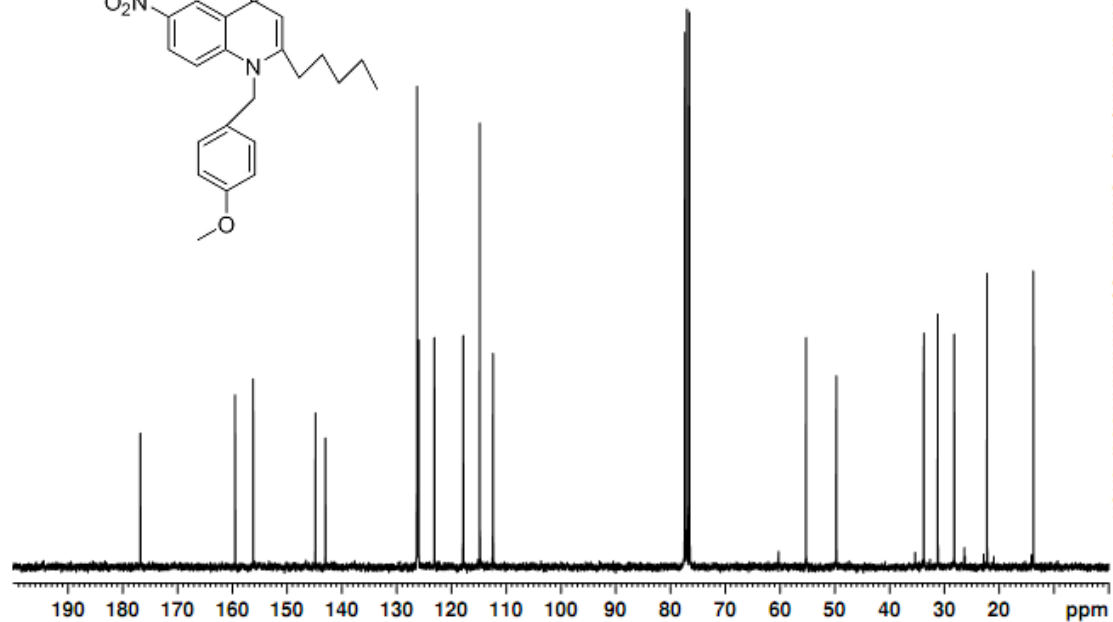

**6-Amino-1-(3,4-dimethoxyphenethyl)-2-*p*-tolylquinolin-4(1*H*)-one (8aa).**

Miliutina MM-114-2 1H DMSO

7.89  
7.77  
7.43  
7.42  
7.33  
7.31  
7.22  
7.20  
7.17  
6.80  
6.77  
6.42  
6.41  
6.39  
6.39  
6.24  
6.14  
5.74

4.24  
4.21  
4.19  
3.73  
3.59

2.84  
2.82  
2.79  
2.54  
2.41

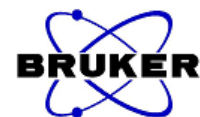

NAME 121121.u306  
EXPNO 10  
PROCNO 1  
Date\_ 20121121  
Time 8.56  
INSTRUM spect  
PROBHD 5 mm PABBO BB-  
PULPROG zg30  
TD 65536  
SOLVENT DMSO  
NS 16  
DS 2  
SWH 6009.615 Hz  
FIDRES 0.091699 Hz  
AQ 5.4526453 sec  
RG 50.8  
DW 83.200 usec  
DE 10.00 usec  
TE 298.2 K  
D1 1.0000000 sec  
TD0 1

==== CHANNEL f1 =====  
NUC1 1H  
PI 10.00 usec  
PL1 0.00 dB  
PL1W 11.25325108 W  
SFO1 300.1318534 MHz  
SI 32768  
SF 300.1299967 MHz  
WDW EM  
SSB 0  
LB 0.30 Hz  
GB 0  
PC 1.00

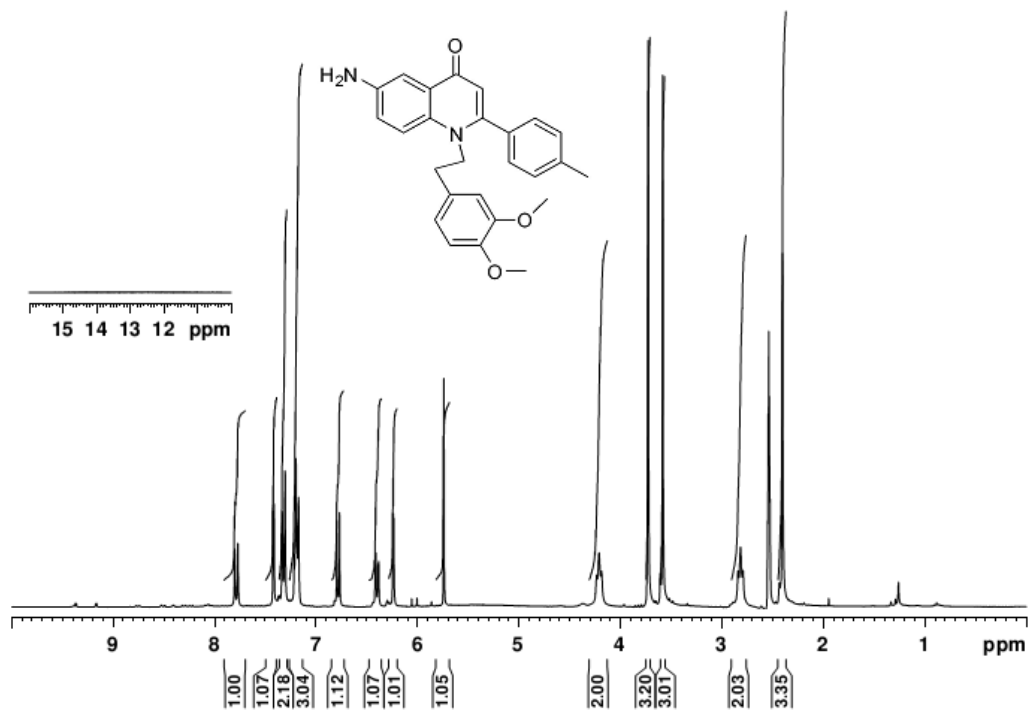

6-Amino-1-(3,4-dimethoxyphenethyl)-2-*p*-tolylquinolin-4(1*H*)-one (8aa).

Miliutina, MM-114-2, CDC13, 13C

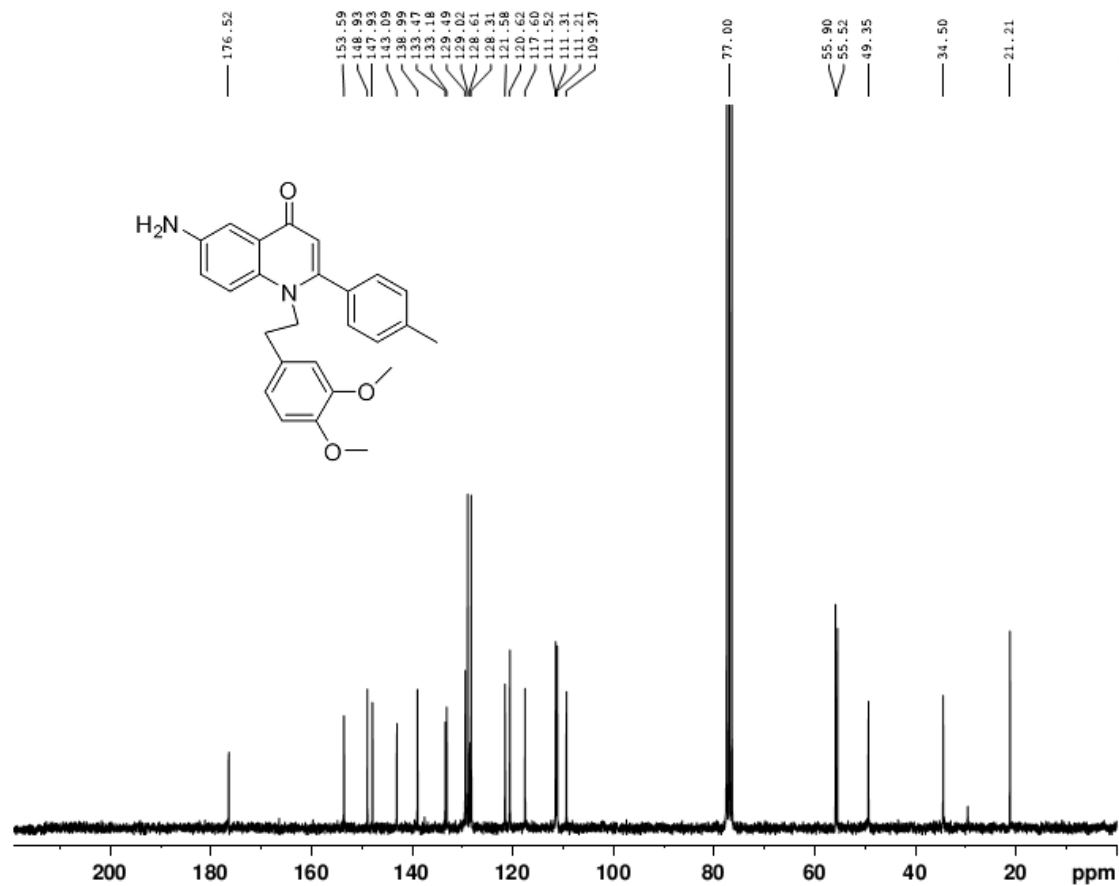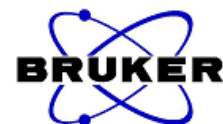

NAME 120706.203  
 EXPNO 10  
 PROCNO 1  
 Date\_ 20120706  
 Time 22.36  
 INSTRUM spect  
 PROBHD 5 mm F4BBO BB-  
 PULPROG zgpg30  
 TD 65536  
 SOLVENT CDC13  
 NS 2048  
 DS 4  
 SWH 15000.000 Hz  
 FIDRES 0.228882 Hz  
 AQ 2.1845834 sec  
 RG 2050  
 DW 33.333 usec  
 DE 10.00 usec  
 TE 298.6 K  
 D1 2.00000000 sec  
 d11 0.03000000 sec  
 DELTA 1.89999998 sec  
 TDO 1

===== CHANNEL f1 =====  
 NUC1 13C  
 P1 10.00 usec  
 PL1 -1.00 dB  
 SFO1 62.9015280 MHz

===== CHANNEL f2 =====  
 CPDPRG2 waltz16  
 NUC2 1H  
 PCPD2 70.00 usec  
 PL12 15.00 dB  
 PL13 15.00 dB  
 PL2 -2.50 dB  
 SFO2 250.1310005 MHz  
 SI 32768  
 SF 62.8952423 MHz  
 WDW EM  
 SSB 0  
 LB 1.00 Hz  
 GB 0  
 PC 1.40

**6-Amino-1-(4-methoxybenzyl)-2-*p*-tolylquinolin-4(1*H*)-one (8ab).**

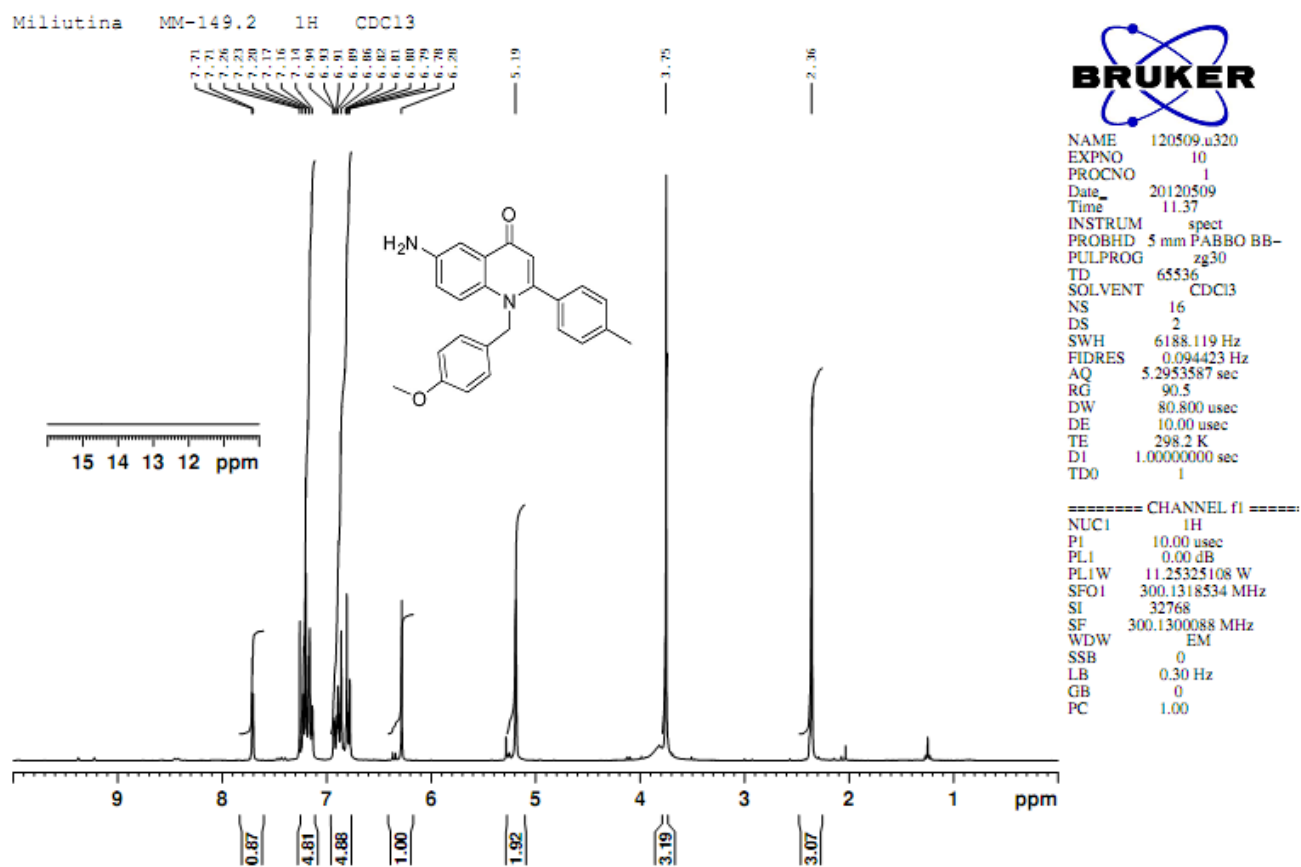

**6-Amino-1-(4-methoxybenzyl)-2-*p*-tolylquinolin-4(1*H*)-one (8ab).**

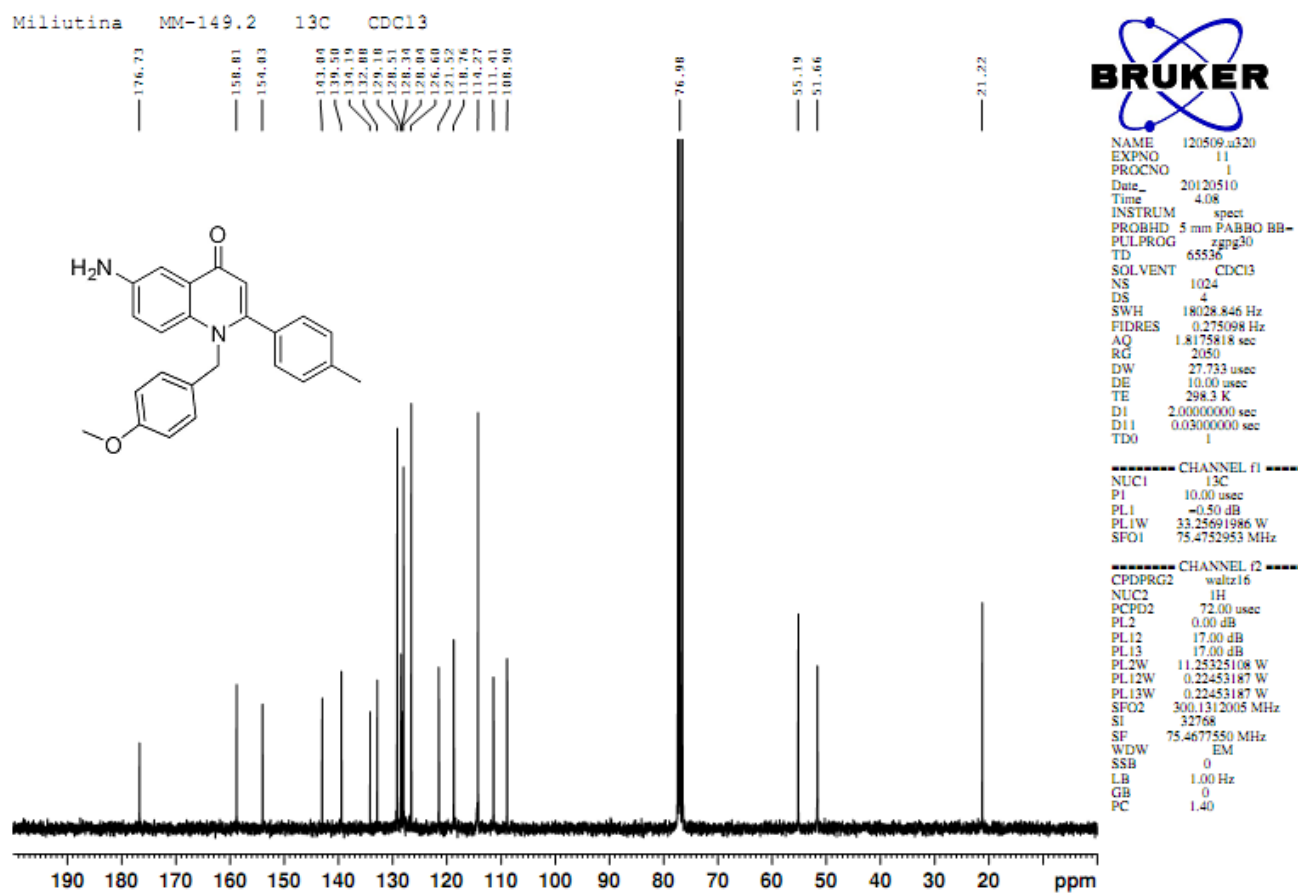

**6-Amino-1-(1-phenylethyl)-2-*p*-tolylquinolin-4(1*H*)-one (8ac).**

Miliutina MM-129 1H DMSO/CH<sub>2</sub>Cl<sub>2</sub> (20:1)

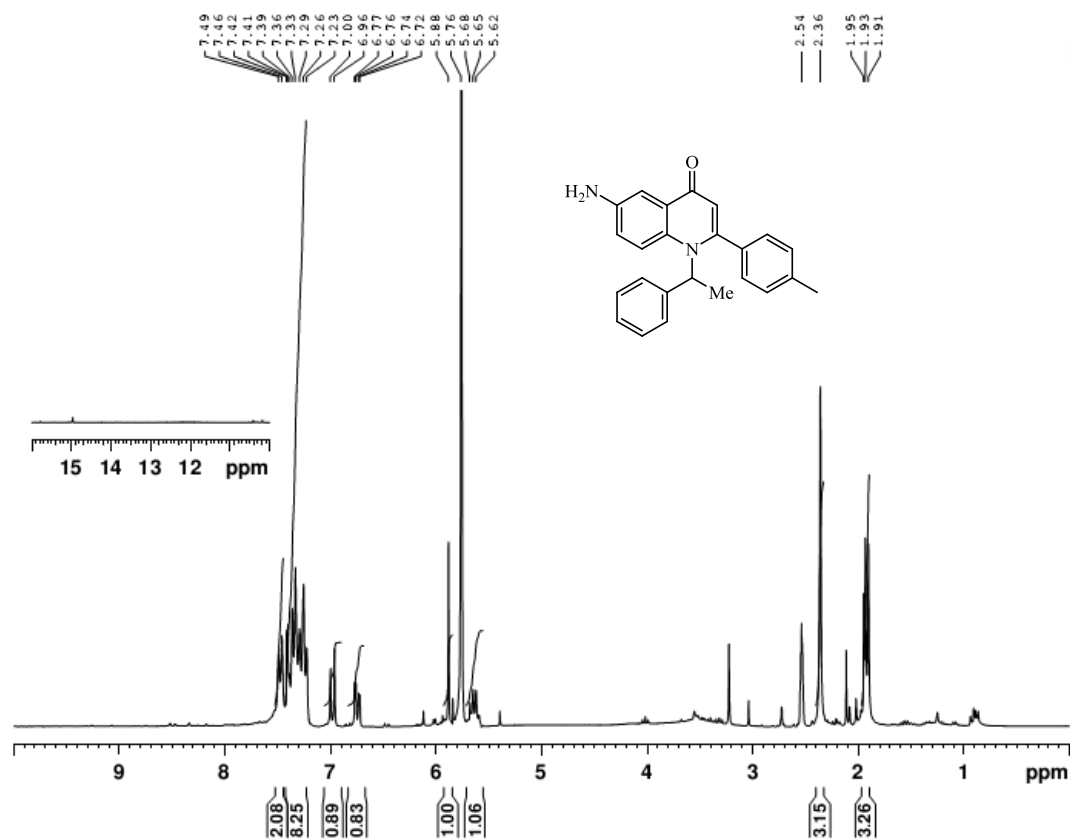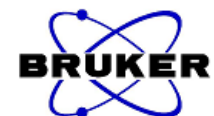

NAME 121217\_205  
 EXPNO 10  
 PROCNO 1  
 Date\_ 20121217  
 Time 14.03  
 INSTRUM spect  
 PROBHD 5 mm QNP 1H/13  
 PULPROG zg30  
 TD 65536  
 SOLVENT DMSO  
 NS 16  
 DS 2  
 SWH 5165.289 Hz  
 FIDRES 0.078816 Hz  
 AQ 6.3439350 sec  
 RG 161  
 DW 96.800 usec  
 DE 10.00 usec  
 TE 298.2 K  
 D1 1.0000000 sec  
 TD0 1

===== CHANNEL f1 =====  
 NUC1 1H  
 PI 11.40 usec  
 PL1 -3.00 dB  
 SFO1 250.1315447 MHz  
 SI 32768  
 SF 250.1299838 MHz  
 WDW EM  
 SSB 0  
 LB 0.30 Hz  
 GB 0  
 PC 1.00



6-Amino-1-(1-phenylethyl)-2-*p*-tolylquinolin-4(1*H*)-one (8a**c**).

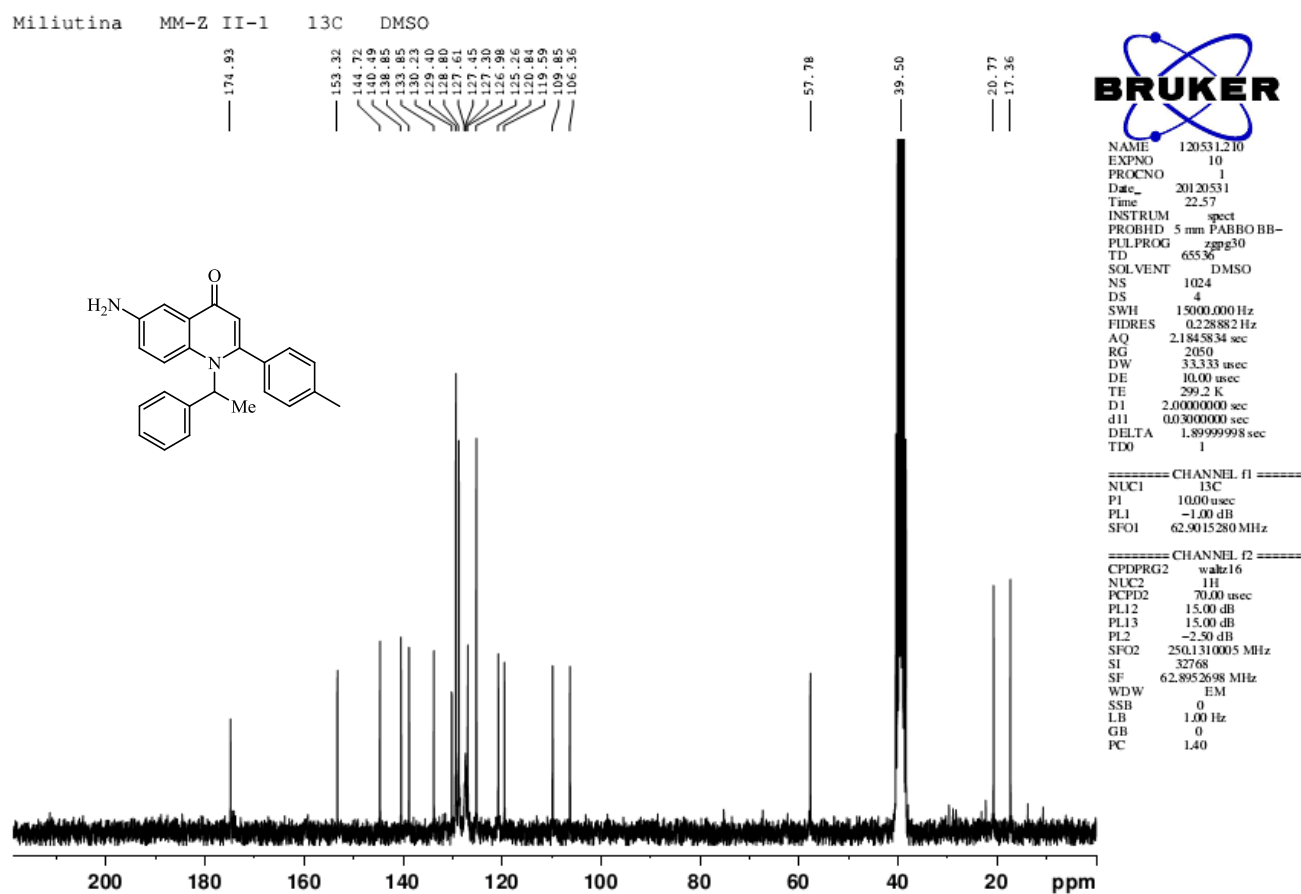

6-Amino-1-heptyl-2-*p*-tolylquinolin-4(1*H*)-one (**8ad**).

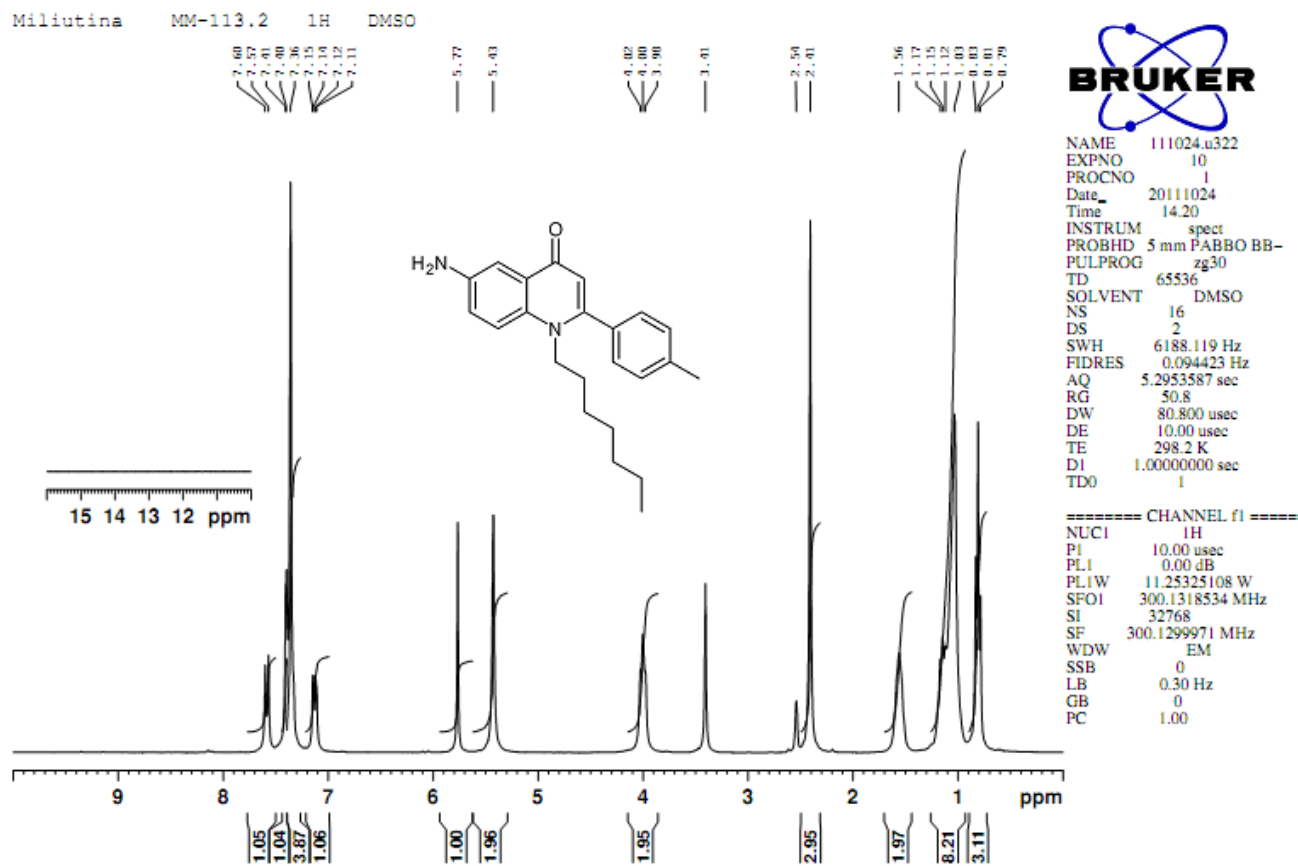

6-Amino-1-heptyl-2-*p*-tolylquinolin-4(1*H*)-one (8ad).

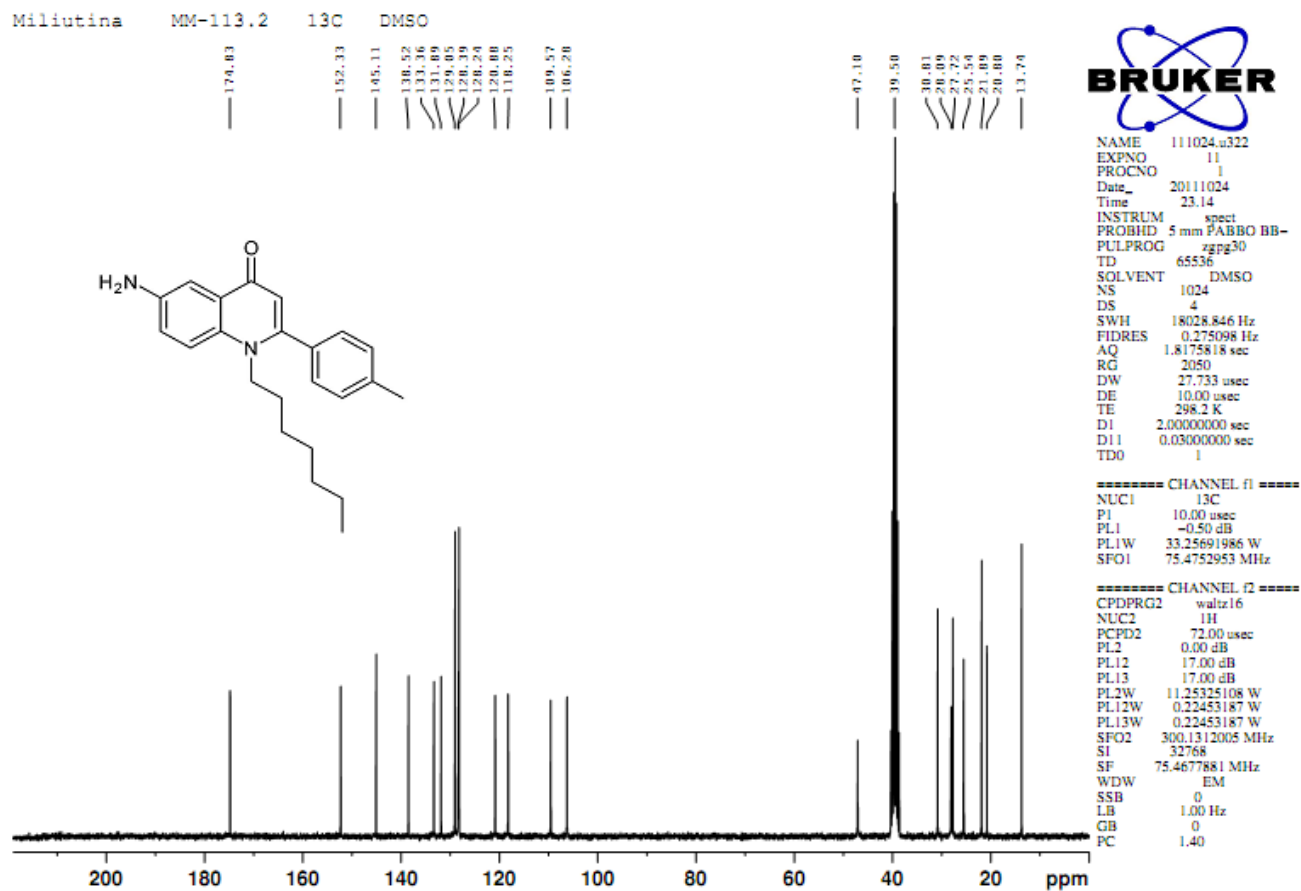

6-Amino-1-hexyl-2-*p*-tolylquinolin-4(1*H*)-one (8ae).

Miliutina MM-112 1H DMSO

7.59  
7.56  
7.39  
7.36  
7.36  
7.13  
7.11  
7.10

5.76  
5.41

4.02  
4.00  
3.97

3.39

2.53  
2.41

1.55  
1.52  
1.52  
1.10  
1.08  
1.06  
1.02  
0.76  
0.76  
0.73

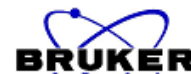

NAME 110902.u301  
EXPNO 10  
PROCNO 1  
Date\_ 20110902  
Time 8.04  
INSTRUM spect  
PROBHD 5 mm PABBO BB-  
PULPROG zg30  
TD 65536  
SOLVENT DMSO  
NS 16  
DS 2  
SWH 6188.119 Hz  
FIDRES 0.094423 Hz  
AQ 5.2953587 sec  
RG 57  
DW 80.800 usec  
DE 10.00 usec  
TE 298.2 K  
D1 1.0000000 sec  
TD0 1

===== CHANNEL f1 =====  
NUC1 1H  
P1 10.00 usec  
PL1 0.00 dB  
PL1W 11.25325108 W  
SFO1 300.1318534 MHz  
SI 32768  
SF 300.1300000 MHz  
WDW EM  
SSB 0  
LB 0.30 Hz  
GB 0  
PC 1.00

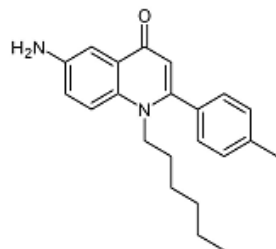

15 14 13 12 ppm

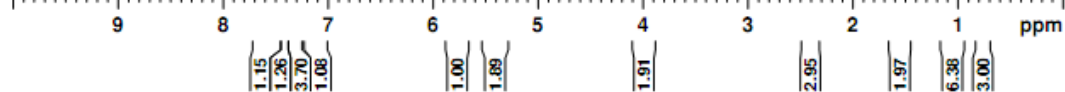

6-Amino-1-hexyl-2-*p*-tolylquinolin-4(1*H*)-one (8ae).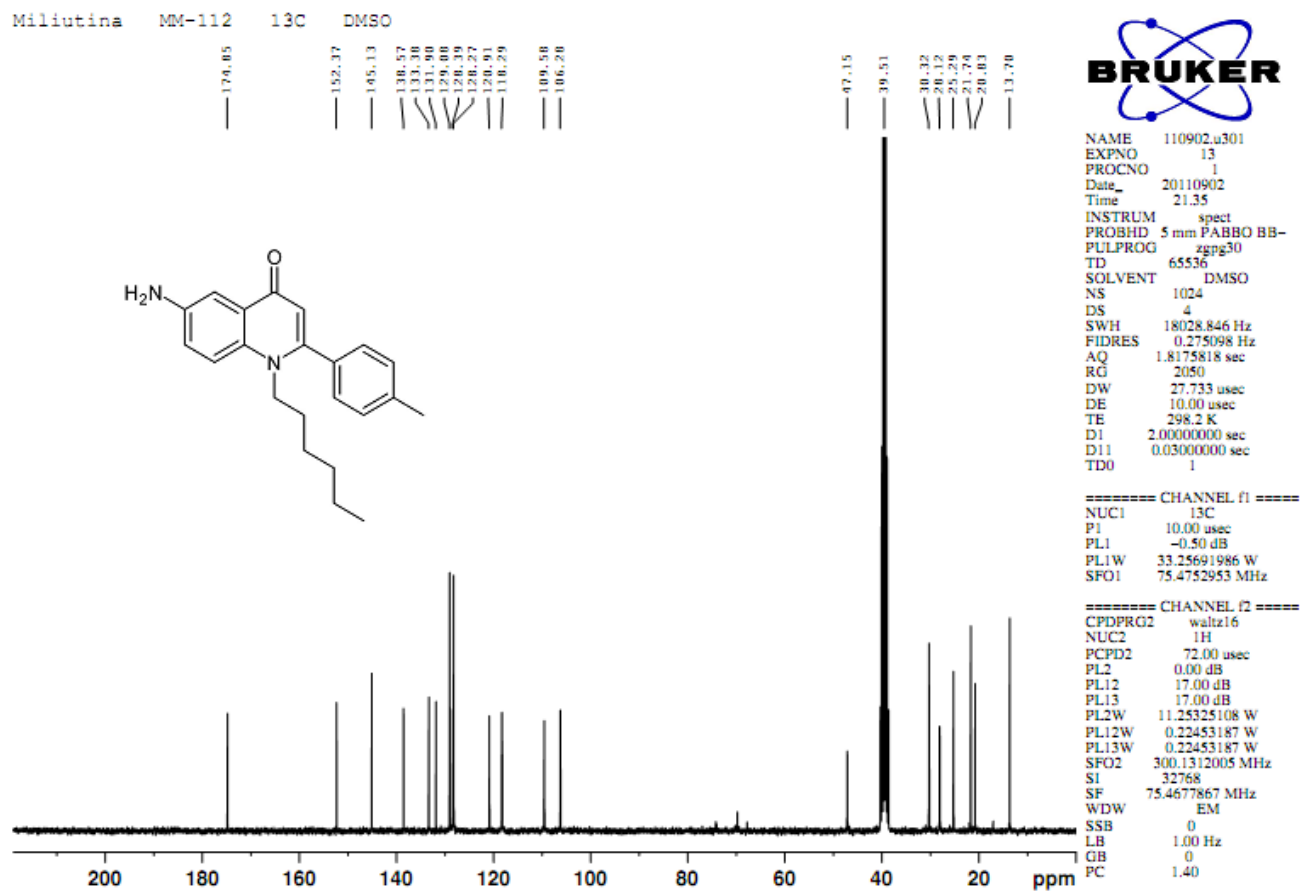

## 6-Amino-1-cyclohexyl-2-p-tolylquinolin-4(1H)-one (8af).

Miliutina MM-160-2 1H DMSO

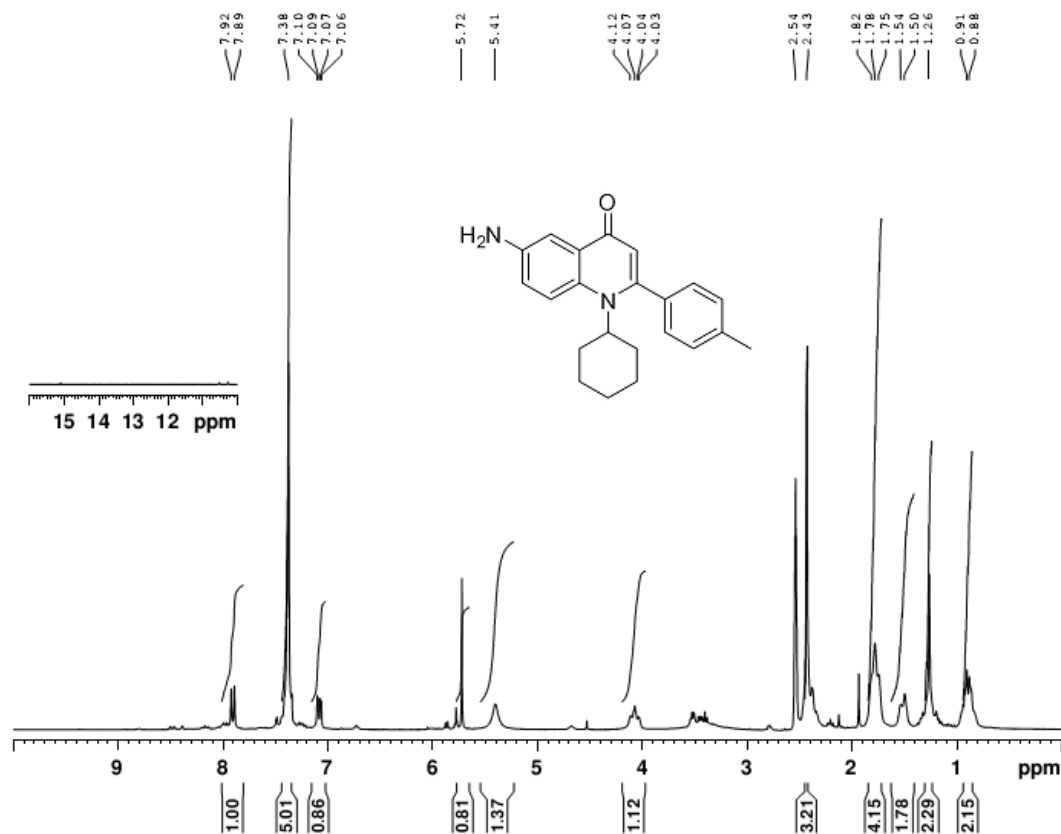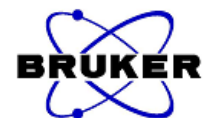

NAME 130125.u314  
 EXPNO 10  
 PROCNO 1  
 Date\_ 20130125  
 Time 10.52  
 INSTRUM spect  
 PROBHD 5 mm PABBO BB-  
 PULPROG zg30  
 TD 65536  
 SOLVENT DMSO  
 NS 16  
 DS 2  
 SWH 6188.119 Hz  
 FIDRES 0.094423 Hz  
 AQ 5.2953587 sec  
 RG 50.8  
 DW 80.800 usec  
 DE 10.00 usec  
 TE 298.2 K  
 D1 1.0000000 sec  
 TD0 1

==== CHANNEL f1 ====  
 NUC1 1H  
 P1 10.00 usec  
 PL1 0.00 dB  
 PL1W 11.25325108 W  
 SFO1 300.1318534 MHz  
 SI 32768  
 SF 300.1299968 MHz  
 WDW EM  
 SSB 0  
 LB 0.30 Hz  
 GB 0  
 PC 1.00

6-Amino-1-cyclohexyl-2-*p*-tolylquinolin-4(1*H*)-one (8af).

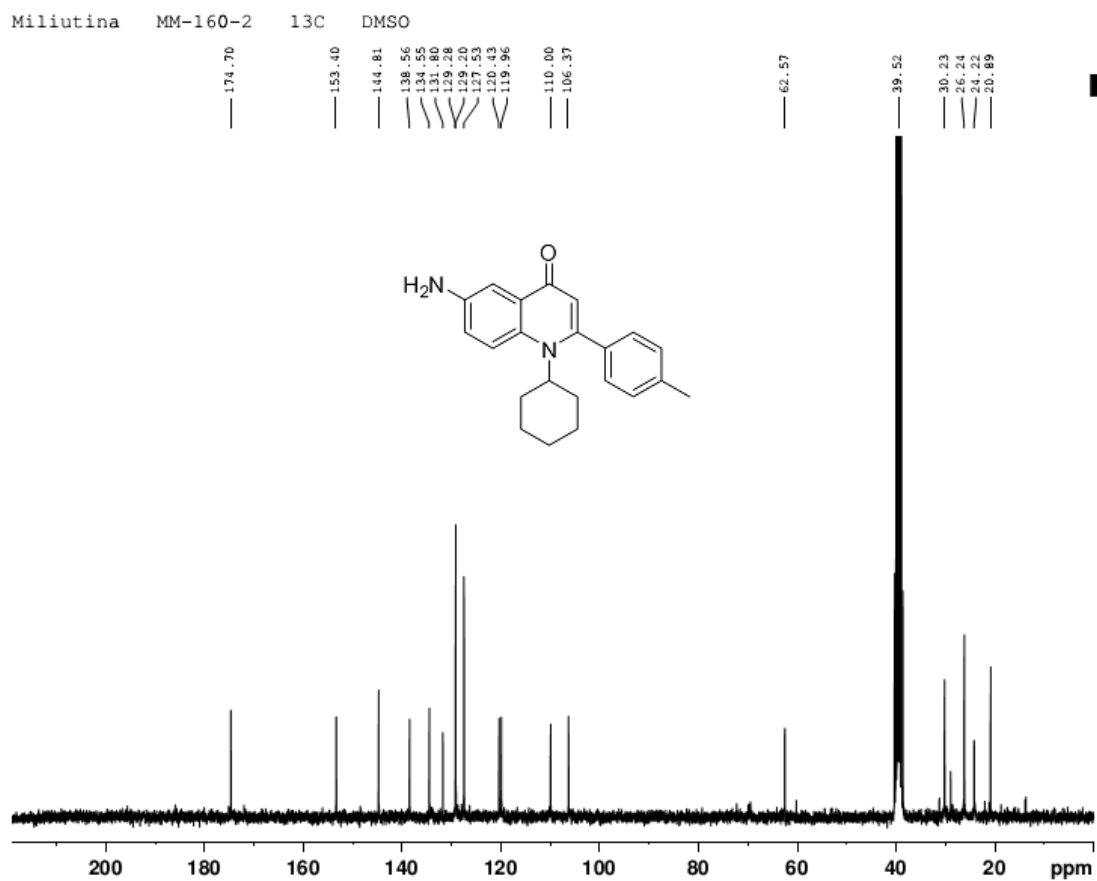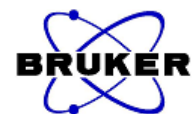

NAME 130125a314  
 EXPNO 11  
 PROCNO 1  
 Date\_ 20130125  
 Time 22:03  
 INSTRUM spect  
 PROBHD 5 mm PABBO BB-  
 PULPROG zgpg30  
 TD 65536  
 SOLVENT DMSO  
 NS 1024  
 DS 4  
 SW H 18028.846 Hz  
 FIDRES 0.275098 Hz  
 AQ 1.8173818 sec  
 RG 2050  
 DW 27.733 usec  
 DE 10.00 usec  
 TE 298.2 K  
 D1 2.0000000 sec  
 D11 0.0300000 sec  
 TDO 1

===== CHANNEL f1 =====  
 NUC1 13C  
 P1 10.00 usec  
 PL1 -0.50 dB  
 PL1W 33.25691986 W  
 SFO1 75.4752953 MHz

===== CHANNEL f2 =====  
 CPDPRG2 waltz16  
 NUC2 1H  
 PCPD2 72.00 usec  
 PL2 0.00 dB  
 PL12 17.00 dB  
 PL13 17.00 dB  
 PL2W 11.25325108 W  
 PL12W 0.22453187 W  
 PL13W 0.22453187 W  
 SFO2 300.1312005 MHz  
 SI 32768  
 SF 75.4677867 MHz  
 WDW EM  
 SSB 0  
 LB 1.00 Hz  
 GB 0  
 PC 1.40

6-Amino-1-pentyl-2-*p*-tolylquinolin-4(1*H*)-one (8ag).

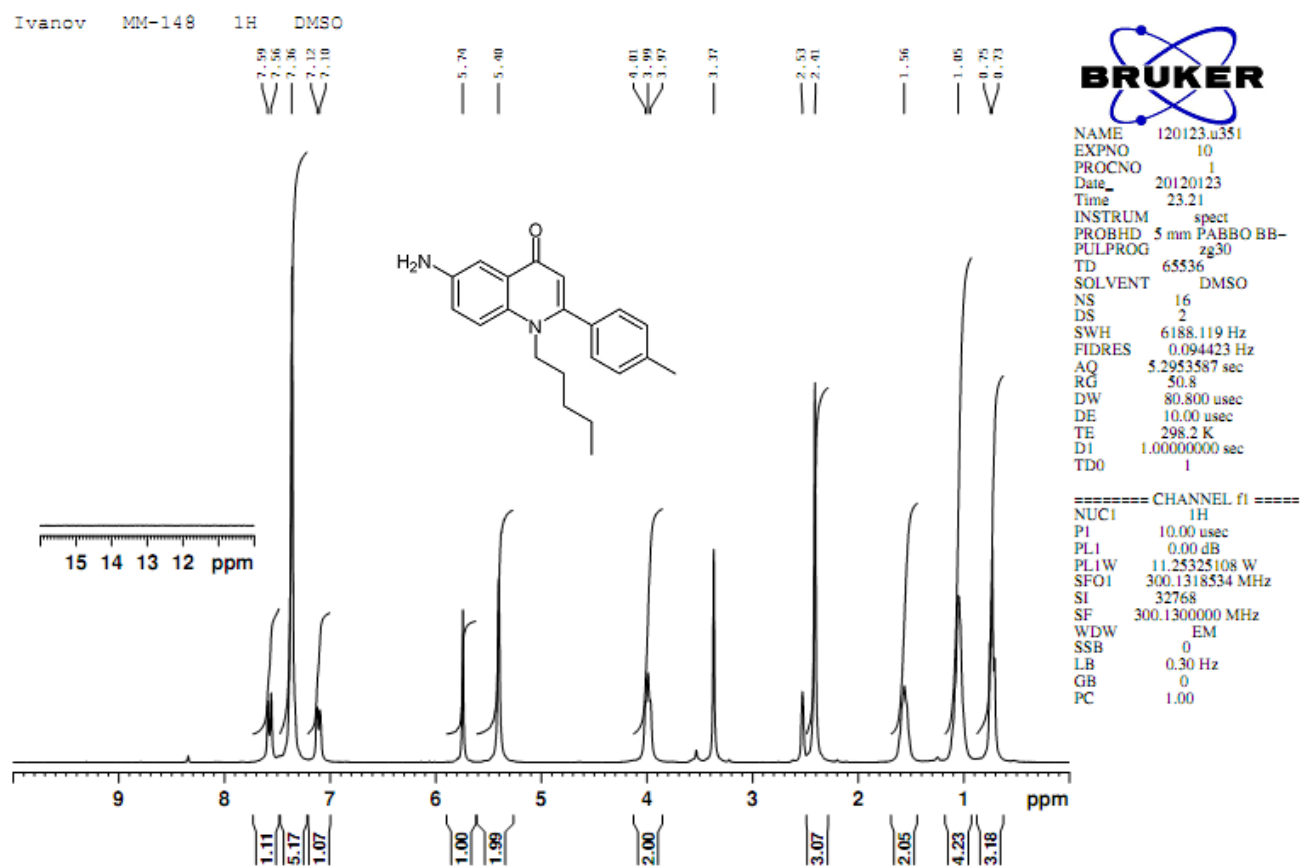



6-Amino-1-pentyl-2-*p*-tolylquinolin-4(1*H*)-one (8ag).

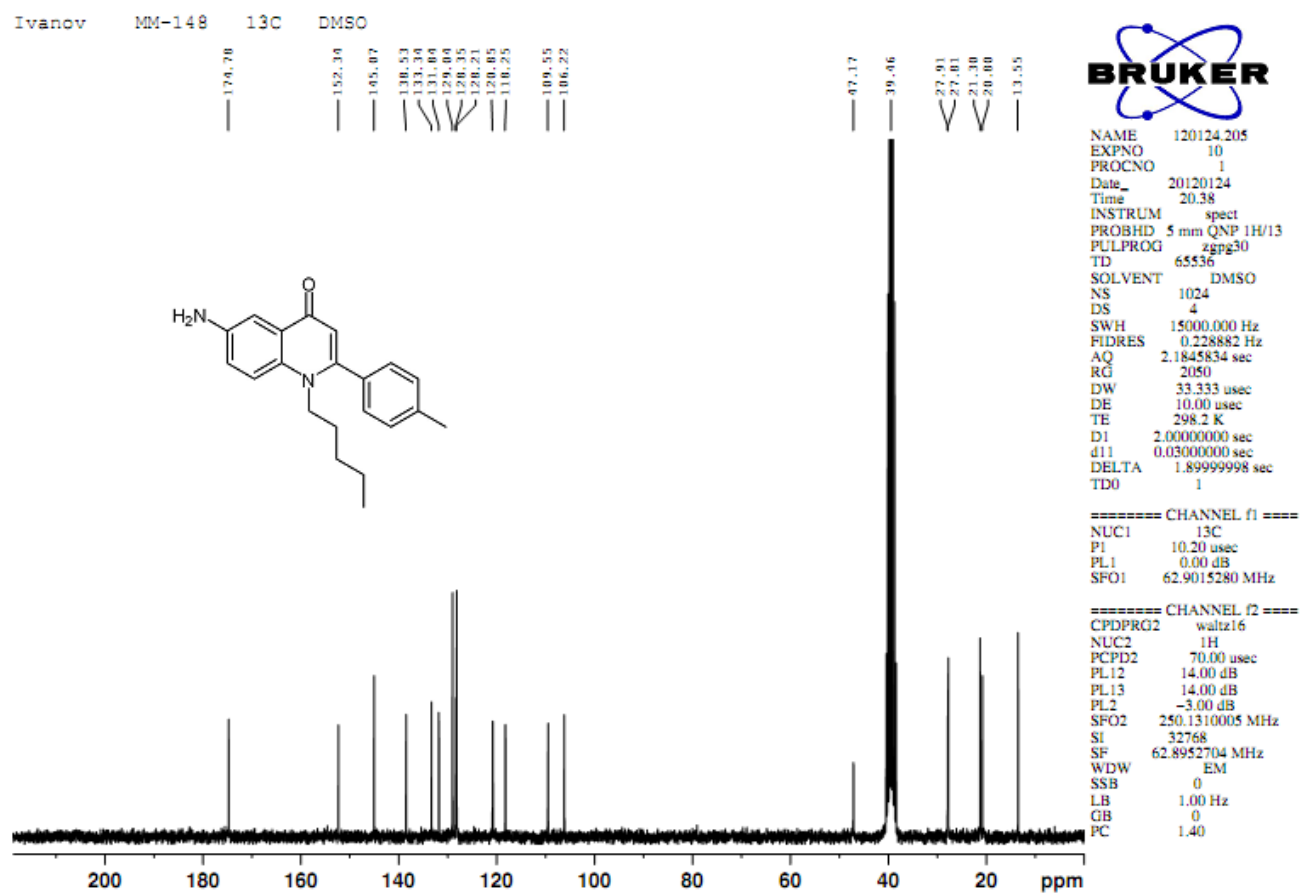

6-Amino-1-*n*-butyl-2-*p*-tolyl-4-quinolone (8ah).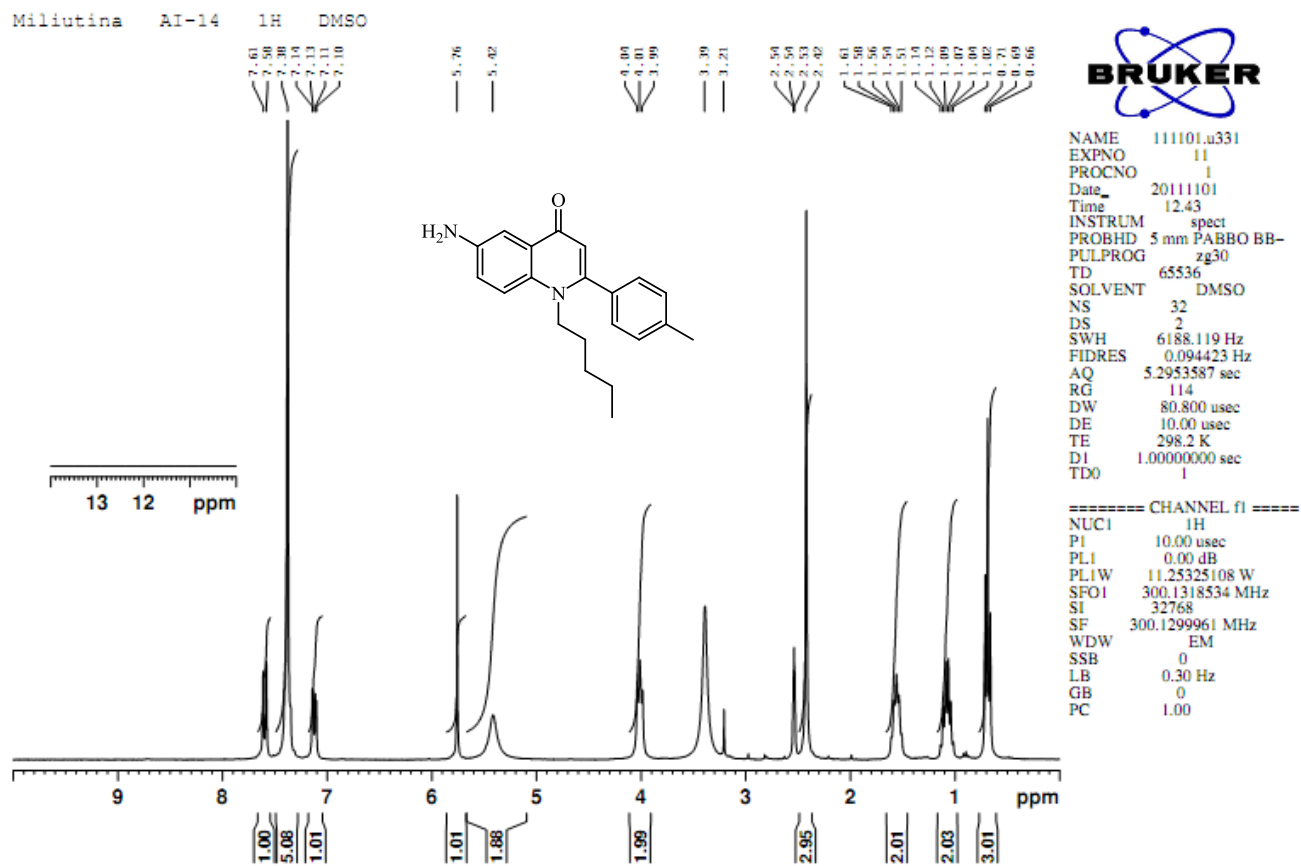

6-Amino-1-*n*-butyl-2-*p*-tolyl-4-quinolone (8ah).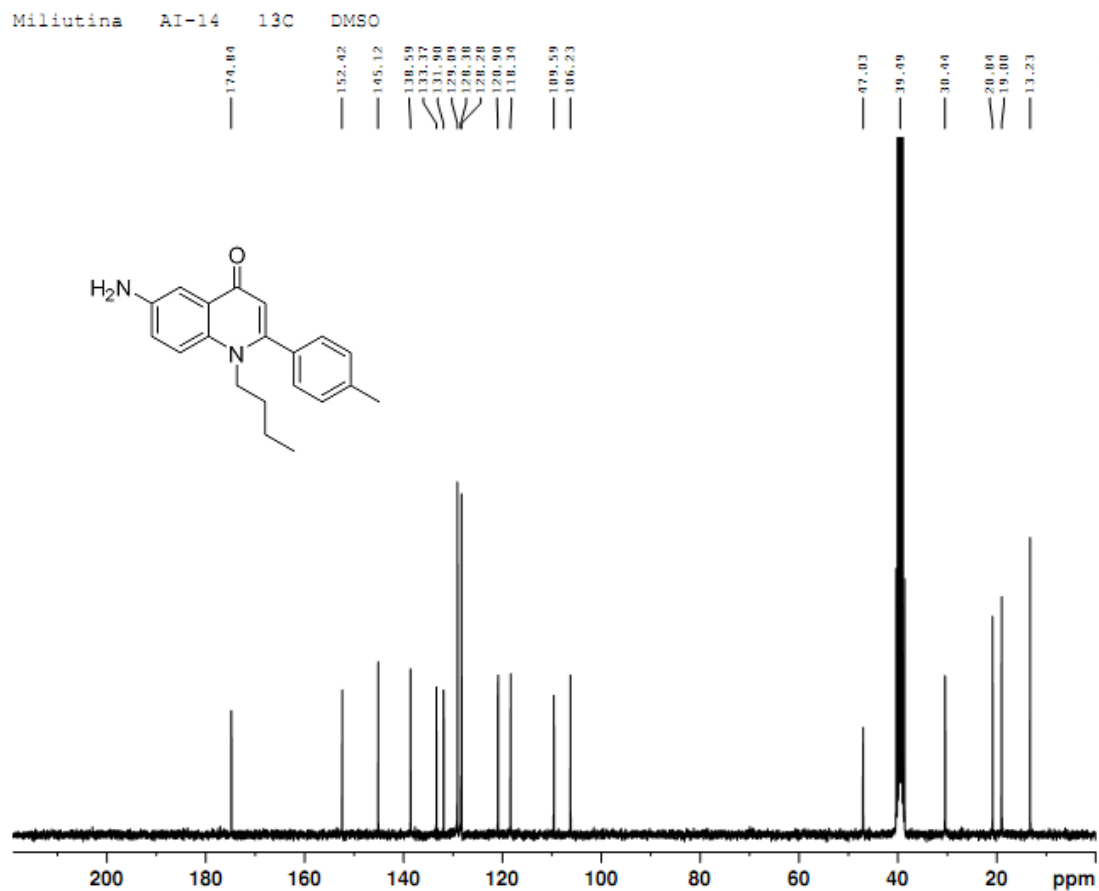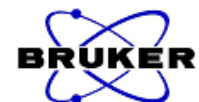

NAME 120302.u307  
 EXPNO 11  
 PROCNO 1  
 Date\_ 20120304  
 Time 16.55  
 INSTRUM spect  
 PROBHD 5 mm PABBO BB-  
 PULPROG zgpg30  
 TD 65536  
 SOLVENT DMSO  
 NS 2048  
 DS 4  
 SWH 18028.846 Hz  
 FIDRES 0.275098 Hz  
 AQ 1.8175818 sec  
 RG 2050  
 DW 27.733 usec  
 DE 10.00 usec  
 TE 298.2 K  
 D1 2.0000000 sec  
 D11 0.0300000 sec  
 TD0 1

===== CHANNEL f1 =====  
 NUC1 13C  
 P1 10.00 usec  
 PL1 -0.50 dB  
 PL1W 33.25691986 W  
 SFO1 75.4752953 MHz

===== CHANNEL f2 =====  
 CPDPRG2 waltz16  
 NUC2 1H  
 PCPD2 72.00 usec  
 PL2 0.00 dB  
 PL12 17.00 dB  
 PL13 17.00 dB  
 PL2W 11.25325108 W  
 PL12W 0.22453187 W  
 PL13W 0.22453187 W  
 SFO2 300.1312005 MHz  
 S1 32768  
 SF 75.4677867 MHz  
 WDW EM  
 SSB 0  
 LB 1.00 Hz  
 GB 0  
 PC 1.40

6-Amino-1-*n*-propyl-2-*p*-tolyl-4-quinolone (8ai).

Miliutina AI-13 1H DMSO

7.60  
7.57  
7.38  
7.37  
7.36  
7.13  
7.12  
7.10  
7.09

5.74  
5.41

3.97  
3.95  
3.92

3.30

2.53  
2.52  
2.52  
2.41

1.62  
1.60  
1.57  
1.55

0.67  
0.66  
0.62

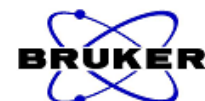

NAME 111101.u332  
EXPNO 10  
PROCNO 1  
Date\_ 20111101  
Time 12.50  
INSTRUM spect  
PROBHD 5 mm PABBO BB-  
PULPROG zg30  
TD 65536  
SOLVENT DMSO  
NS 32  
DS 2  
SWH 6188.119 Hz  
FIDRES 0.094423 Hz  
AQ 5.2953587 sec  
RG 80.6  
DW 80.800 usec  
DE 10.00 usec  
TE 298.2 K  
D1 1.00000000 sec  
TD0 1

==== CHANNEL f1 =====  
NUC1 1H  
P1 10.00 usec  
PL1 0.00 dB  
PL1W 11.25325108 W  
SFO1 300.1318534 MHz  
SI 32768  
SF 300.1300000 MHz  
WDW EM  
SSB 0  
LB 0.30 Hz  
GB 0  
PC 1.00

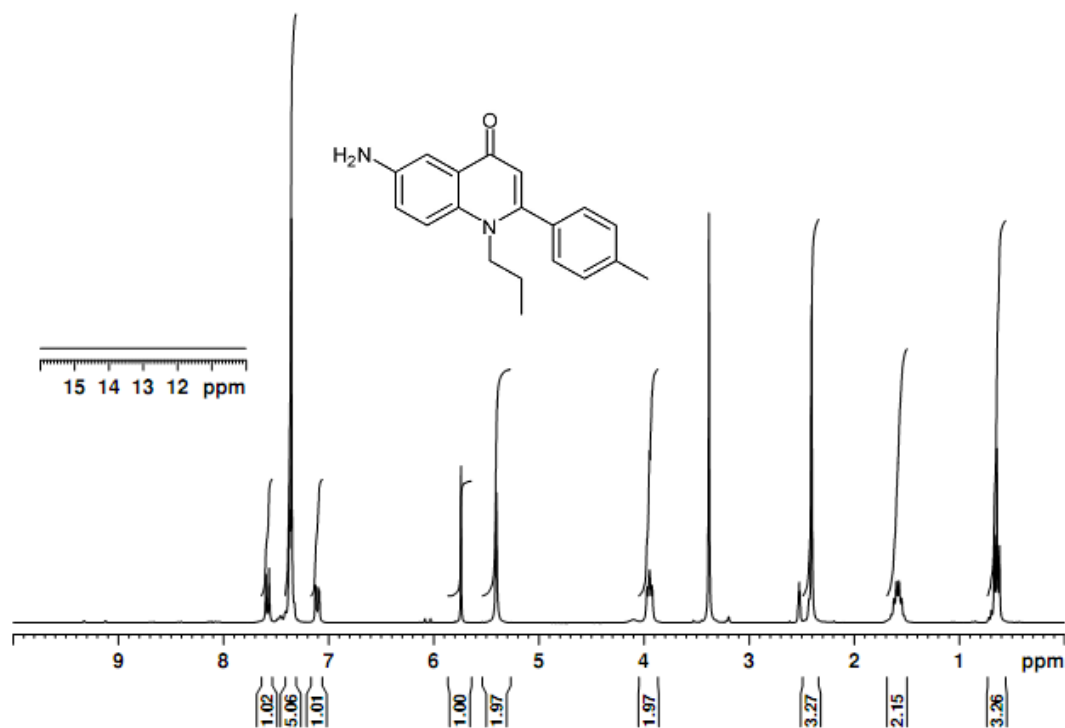

6-Amino-1-*n*-propyl-2-*p*-tolyl-4-quinolone (8ai).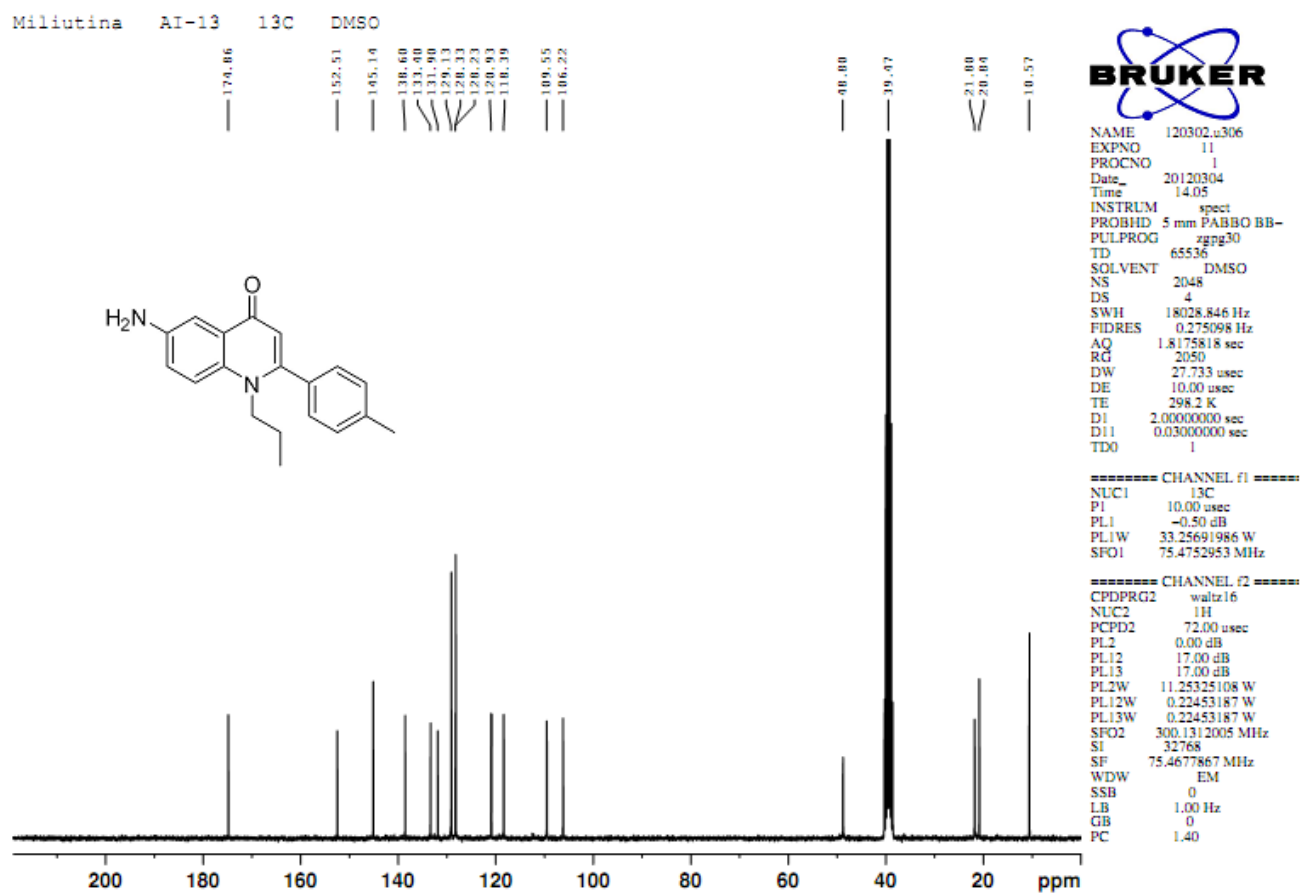

6-Amino-1-isopropyl-2-*p*-tolylquinolin-4(1*H*)-one (8aj).

Miliutina AI-76 1H DMSO

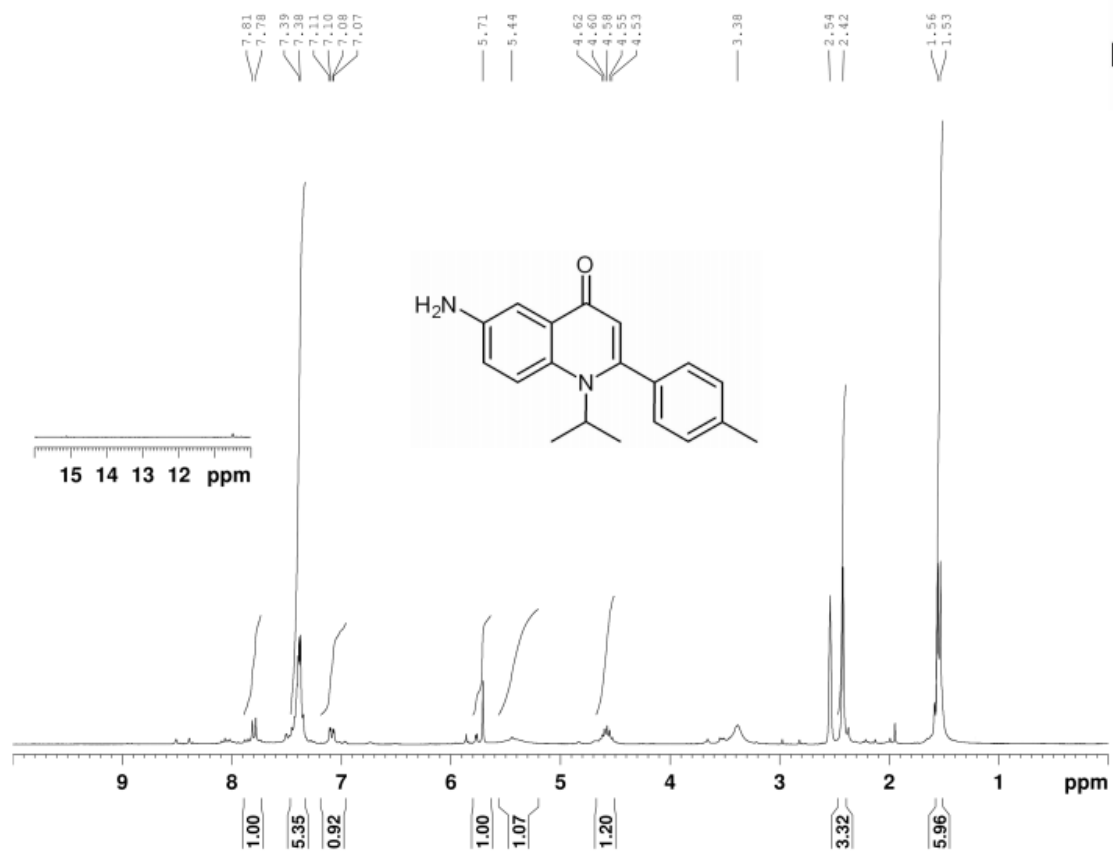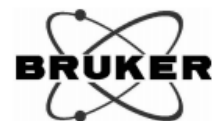

NAME 130123.u315  
 EXPNO 10  
 PROCNO 1  
 Date\_ 20130123  
 Time 13.26  
 INSTRUM spect  
 PROBHD 5 mm PABBO BB-  
 PULPROG zg30  
 TD 65536  
 SOLVENT DMSO  
 NS 16  
 DS 2  
 SWH 6188.119 Hz  
 FIDRES 0.094423 Hz  
 AQ 5.2953587 sec  
 RG 50.8  
 DW 80.800 usec  
 DE 10.00 usec  
 TE 298.2 K  
 D1 1.0000000 sec  
 TD0 1

==== CHANNEL f1 ====  
 NUC1 1H  
 P1 10.00 usec  
 PL1 0.00 dB  
 PL1W 11.25325108 W  
 SFO1 300.1318534 MHz  
 SI 32768  
 SF 300.1299976 MHz  
 WDW EM  
 SSB 0  
 LB 0.30 Hz  
 GB 0  
 PC 1.00

6-Amino-1-isopropyl-2-*p*-tolylquinolin-4(1*H*)-one (8aj).

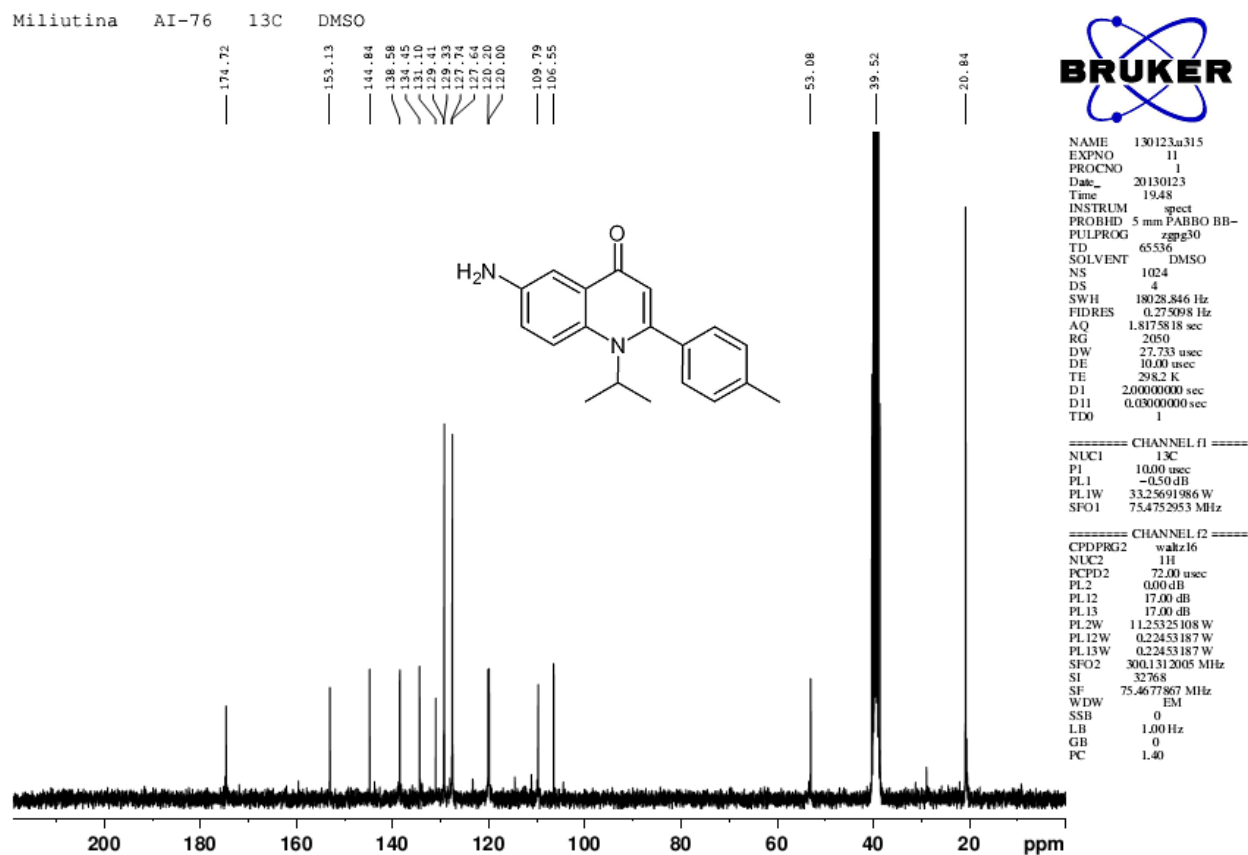

6-Amino-1-phenyl-2-*p*-tolylquinolin-4(1*H*)-one (8ak).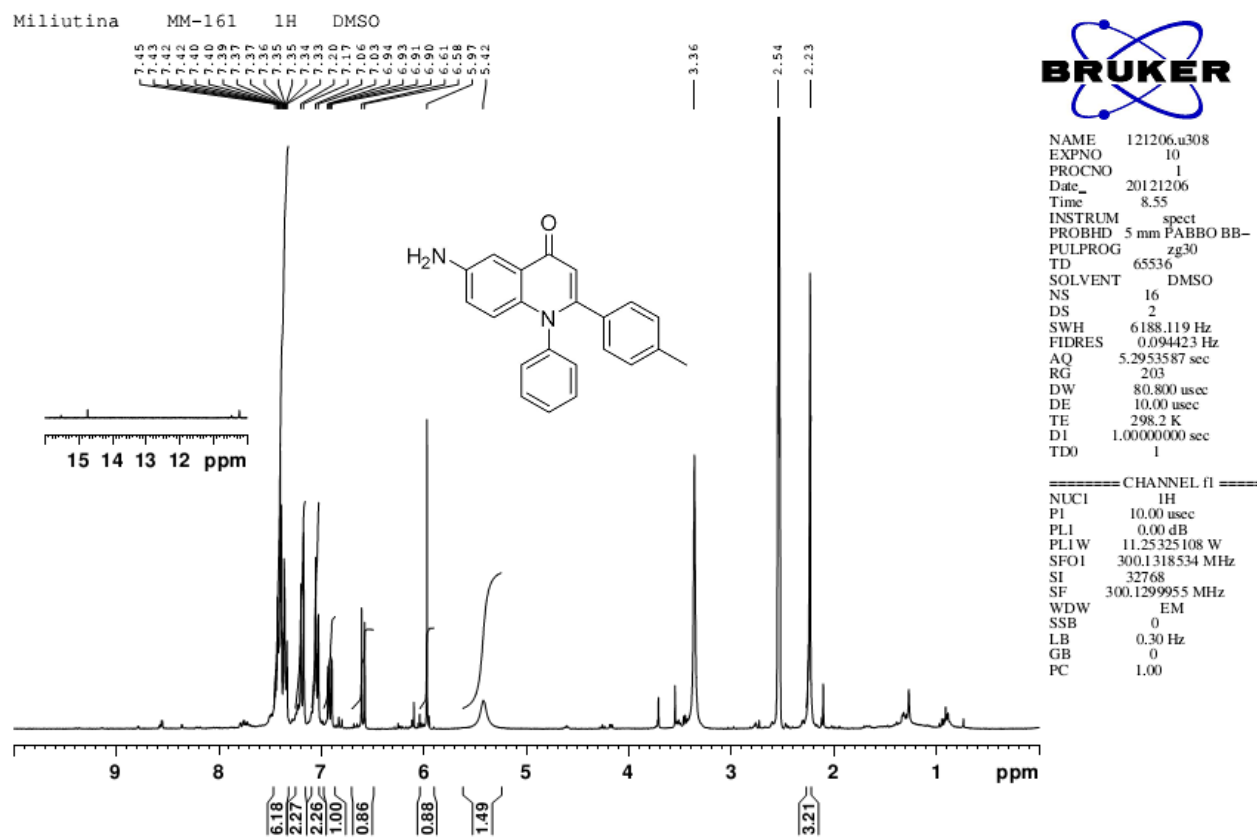



6-Amino-1-phenyl-2-p-tolylquinolin-4(1H)-one (8ak).

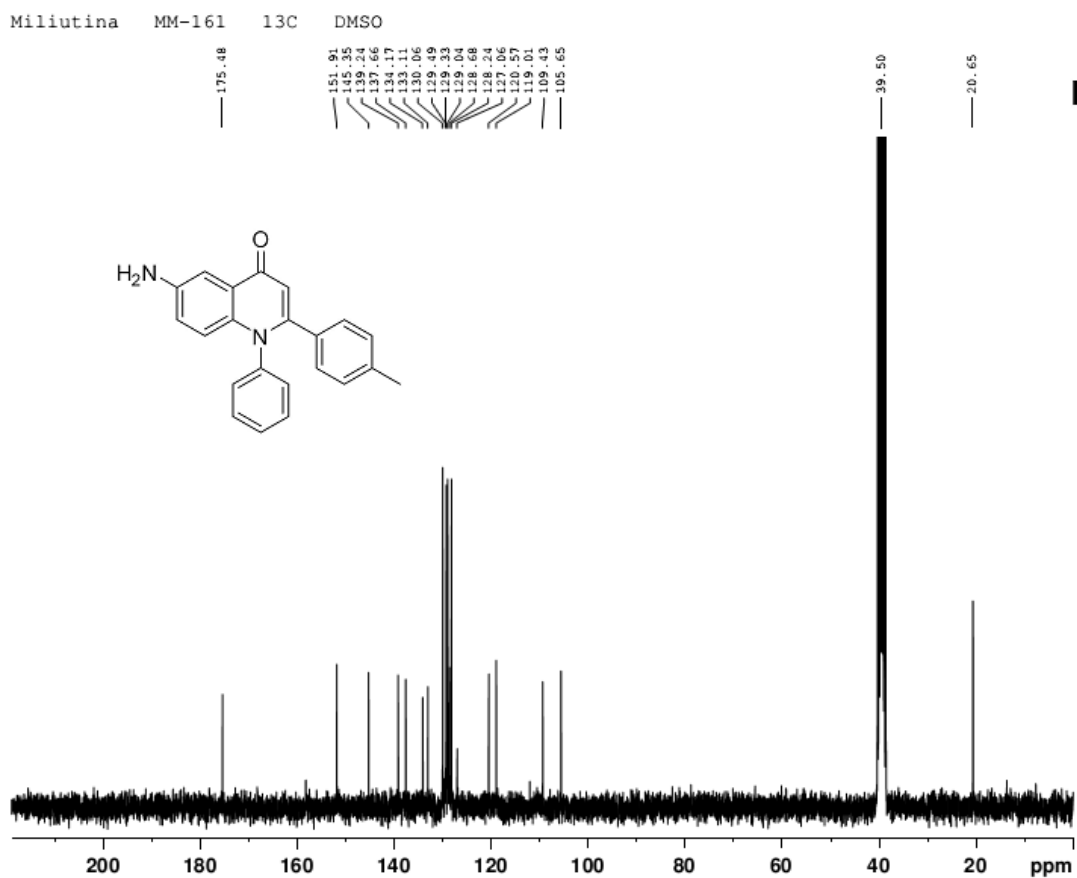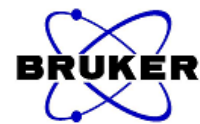

NAME 121207.a319  
EXPNO 10  
PROCNO 1  
Date\_ 20121208  
Time 15.56  
INSTRUM spect  
PROBHD 5 mm PABBO BB-  
PULPROG zgpg30  
TD 65536  
SOLVENT DMSO  
NS 1600  
DS 4  
SWH 18028.846 Hz  
FIDRES 0.275098 Hz  
AQ 1.8175818 sec  
RG 2050  
DW 27.753 usec  
DE 10.00 usec  
TE 298.2 K  
D1 2.0000000 sec  
D11 0.0300000 sec  
TD0 1

==== CHANNEL f1 =====  
NUC1 13C  
P1 10.00 usec  
PL1 -0.50 dB  
PL1W 33.25691986 W  
SFO1 75.4752953 MHz

==== CHANNEL f2 =====  
CPDPRG2 waltz16  
NUC2 1H  
PCPD2 72.00 usec  
PL2 0.00 dB  
PL12 17.00 dB  
PL13 17.00 dB  
PL2W 11.25325108 W  
PL12W 0.22453187 W  
PL13W 0.22453187 W  
SFO2 300.1312005 MHz  
SI 32768  
SF 75.4677879 MHz  
WDW EBI  
SSB 0  
LB 1.00 Hz  
GB 0  
PC 1.40

6-Amino-1-(3,5-dimethylphenyl)-2-*p*-tolylquinolin-4(1*H*)-one (8am4).

Miliutina MM-154.2 1H DMSO

7.40  
7.39  
7.22  
7.19  
7.07  
7.06  
6.97  
6.94  
6.93  
6.91  
6.90  
6.65  
6.62  
5.94  
5.41

3.21

2.54

2.24

2.22

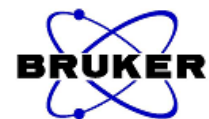

NAME 121120.u335  
EXPNO 10  
PROCNO 1  
Date\_ 20121120  
Time 19.17  
INSTRUM spect  
PROBHD 5 mm PABBO BB-  
PULPROG zg30  
TD 65536  
SOLVENT DMSO  
NS 16  
DS 2  
SWH 6188.119 Hz  
FIDRES 0.094423 Hz  
AQ 5.2953587 sec  
RG 50.8  
DW 80.800 usec  
DE 10.00 usec  
TE 298.2 K  
D1 1.0000000 sec  
TD0 1

==== CHANNEL f1 =====  
NUC1 1H  
P1 10.00 usec  
PL1 0.00 dB  
PL1W 11.25325108 W  
SFO1 300.1318534 MHz  
SI 32768  
SF 300.1299968 MHz  
WDW EM  
SSB 0  
LB 0.30 Hz  
GB 0  
PC 1.00

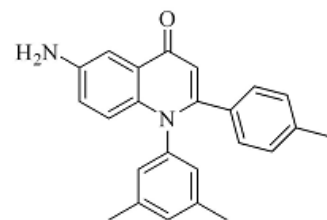

15 14 13 12 ppm

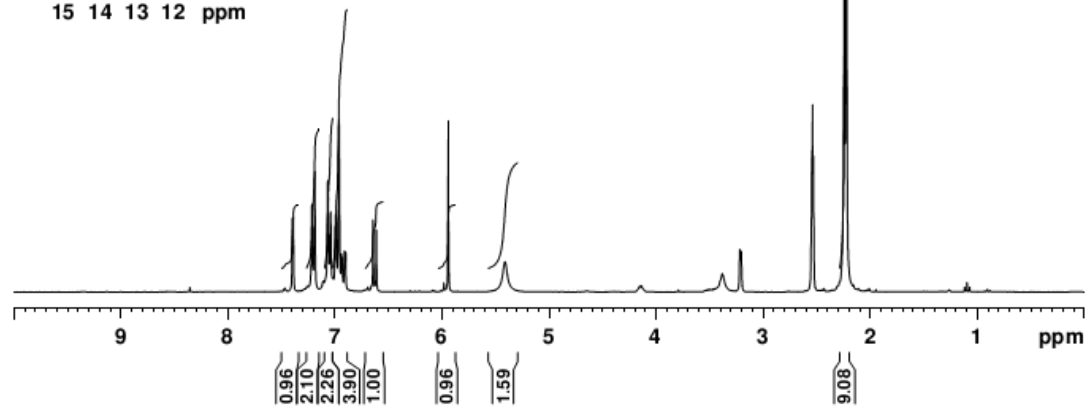

6-Amino-1-(3,5-dimethylphenyl)-2-*p*-tolylquinolin-4(1*H*)-one (8am4).

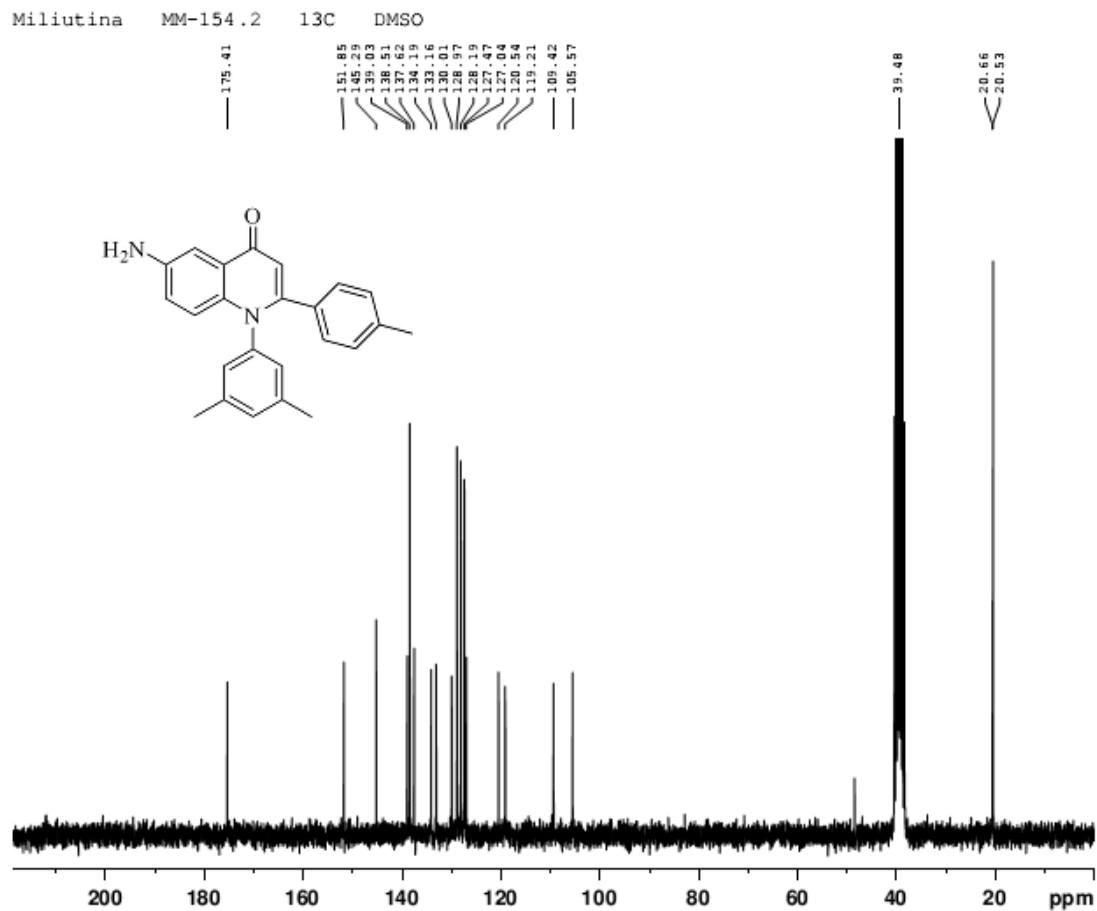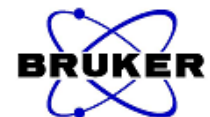

NAME 121122.211  
EXPNO 10  
PROCNO 1  
Date\_ 20121122  
Time 23.16  
INSTRUM spect  
PROBHD 5 mm QNP 1H/13  
PULPROG zgpg30  
TD 65536  
SOLVENT DMSO  
NS 1024  
DS 4  
SWH 15000.000 Hz  
FIDRES 0.228882 Hz  
AQ 2.1845834 sec  
RG 2050  
DW 33.333 usec  
DE 10.00 usec  
TE 298.1 K  
D1 2.0000000 sec  
d11 0.0300000 sec  
DELTA 1.8999998 sec  
TD0 1

==== CHANNEL f1 ====

NUC1 13C  
P1 10.20 usec  
PL1 0.00 dB  
SFO1 62.9015280 MHz

==== CHANNEL f2 ====

CPDPRG2 waltz16  
NUC2 1H  
PCPD2 70.00 usec  
PL12 14.00 dB  
PL13 14.00 dB  
PL2 -3.00 dB  
SFO2 250.1310005 MHz  
SI 32768  
SF 62.8952692 MHz  
WDW EM  
SSB 0  
LB 1.00 Hz  
GB 0  
PC 1.40

6-Amino-1-(2,3-dihydro-1H-inden-5-yl)-2-p-tolylquinolin-4(1H)-one (8anm).

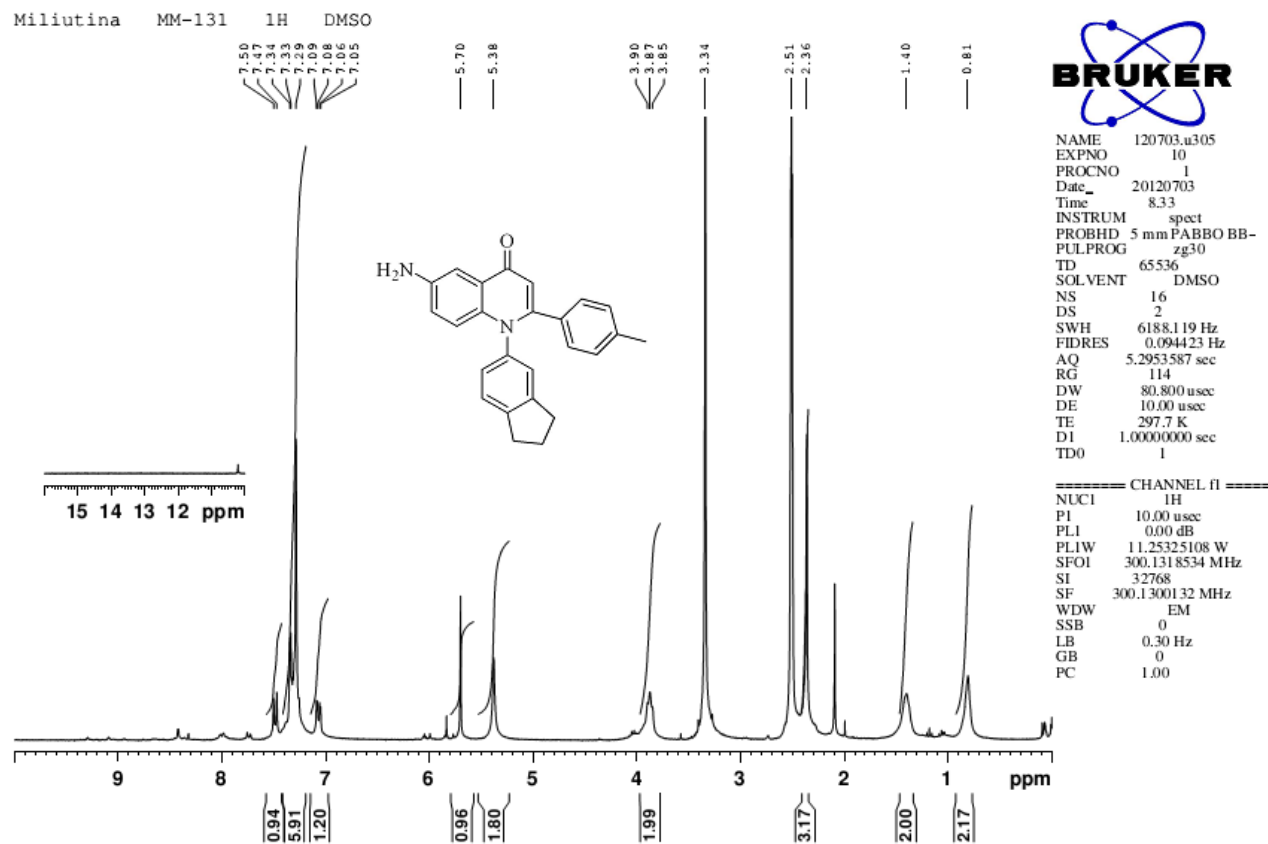

6-Amino-1-(2,3-dihydro-1H-inden-5-yl)-2-p-tolylquinolin-4(1H)-one (8anm).

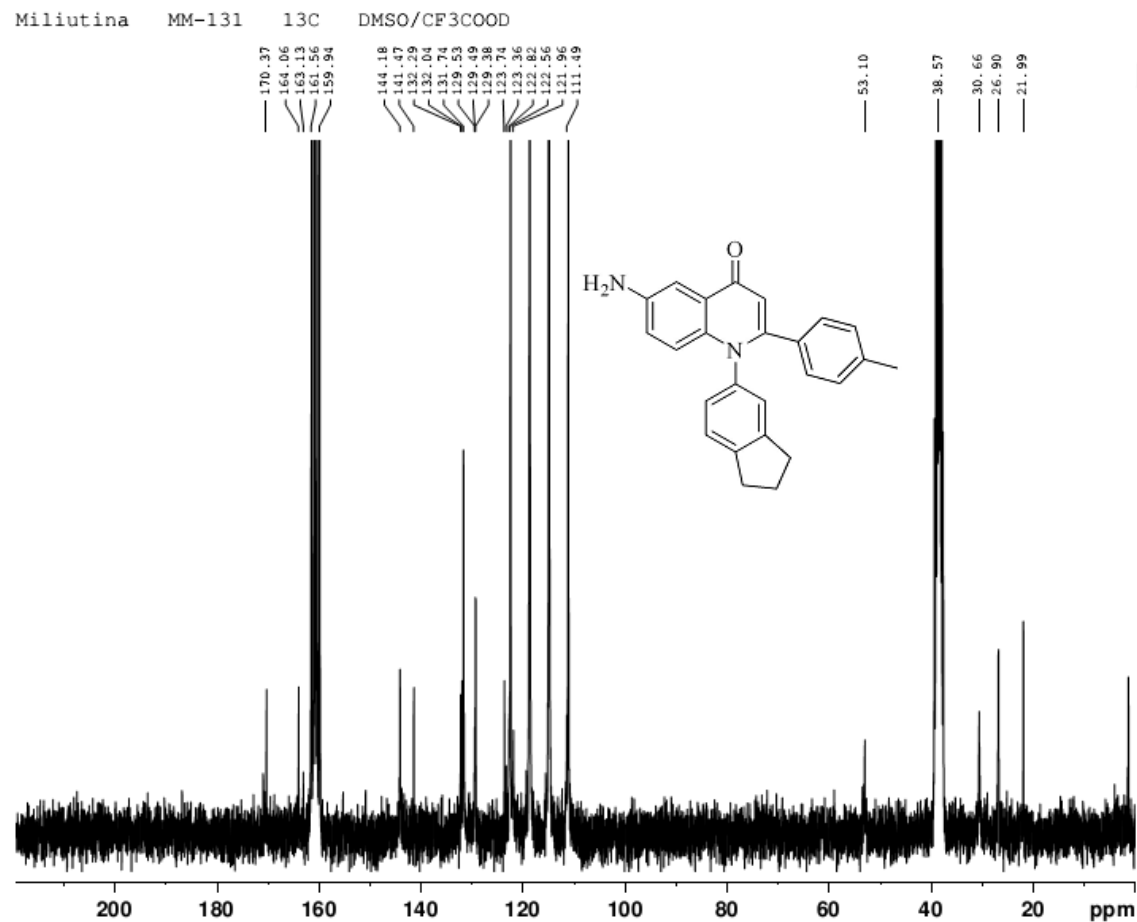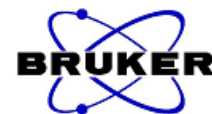

NAME 111024.u331  
 EXPNO 12  
 PROCNO 1  
 Date\_ 20111025  
 Time 3.44  
 INSTRUM spect  
 PROBHD 5 mm PABBO BB-  
 PULPROG zgpg30  
 TD 65536  
 SOLVENT D2O  
 NS 1024  
 DS 4  
 SWH 18028.846 Hz  
 FIDRES 0.275098 Hz  
 AQ 1.8175818 sec  
 RG 2090  
 DW 27.733 usec  
 DE 10.00 usec  
 TE 298.2 K  
 D1 2.00000000 sec  
 D11 0.03000000 sec  
 TD0 1

===== CHANNEL f1 =====  
 NUC1 13C  
 P1 10.00 usec  
 PL1 -0.50 dB  
 PL1W 33.25691986 W  
 SFO1 75.4752953 MHz

===== CHANNEL f2 =====  
 CPDPRG2 waltz16  
 NUC2 1H  
 PCPD2 72.00 usec  
 PL2 0.00 dB  
 PL12 17.00 dB  
 PL13 17.00 dB  
 PL2W 11.25325108 W  
 PL12W 0.22453187 W  
 PL13W 0.22453187 W  
 SFO2 300.1312005 MHz  
 SI 32768  
 SF 75.4677511 MHz  
 WDW EM  
 SSB 0  
 LB 1.00 Hz  
 GB 0  
 PC 1.40

6-Amino-1-(4-methoxyphenyl)-2-*p*-tolylquinolin-4(1*H*)-one (8apn).

Mariia Miliutina, MM-140-2, 1H in DMSO

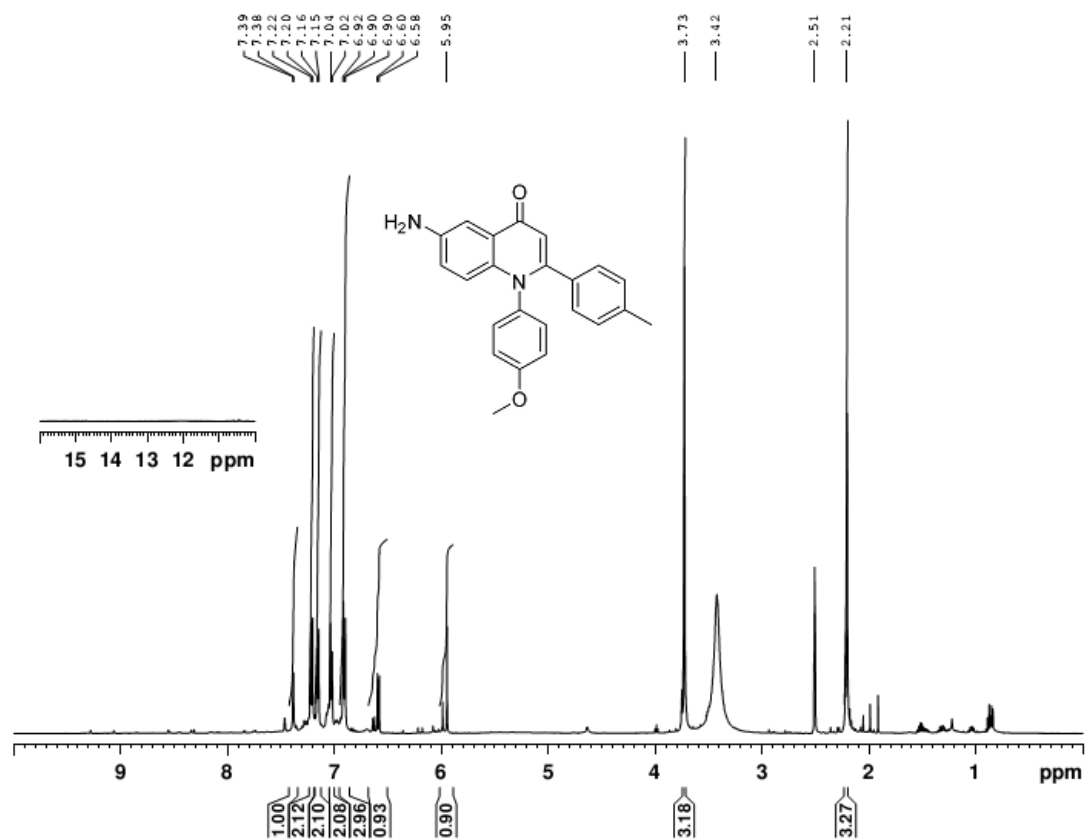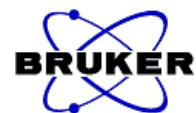

NAME 121128.511  
 EXPNO 10  
 PROCNO 1  
 Date\_ 20121128  
 Time 16.42  
 INSTRUM spect  
 PROBHD 5 mm PABBO BB-  
 PULPROG zg30  
 TD 65536  
 SOLVENT DMSO  
 NS 16  
 DS 2  
 SWH 10330.578 Hz  
 FIDRES 0.157632 Hz  
 AQ 3.1720407 sec  
 RG 45.3  
 DW 48.400 usec  
 DE 10.00 usec  
 TE 300.0 K  
 D1 1.00000000 sec  
 TD0 1

===== CHANNEL f1 =====  
 NUC1 1H  
 P1 9.80 usec  
 PL1 -3.00 dB  
 SFO1 500.1330885 MHz  
 SI 32768  
 SF 500.1300000 MHz  
 WDW EM  
 SSB 0  
 LB 0.30 Hz  
 GB 0  
 PC 1.00

6-Amino-1-(4-methoxyphenyl)-2-*p*-tolylquinolin-4(1*H*)-one (8apn).

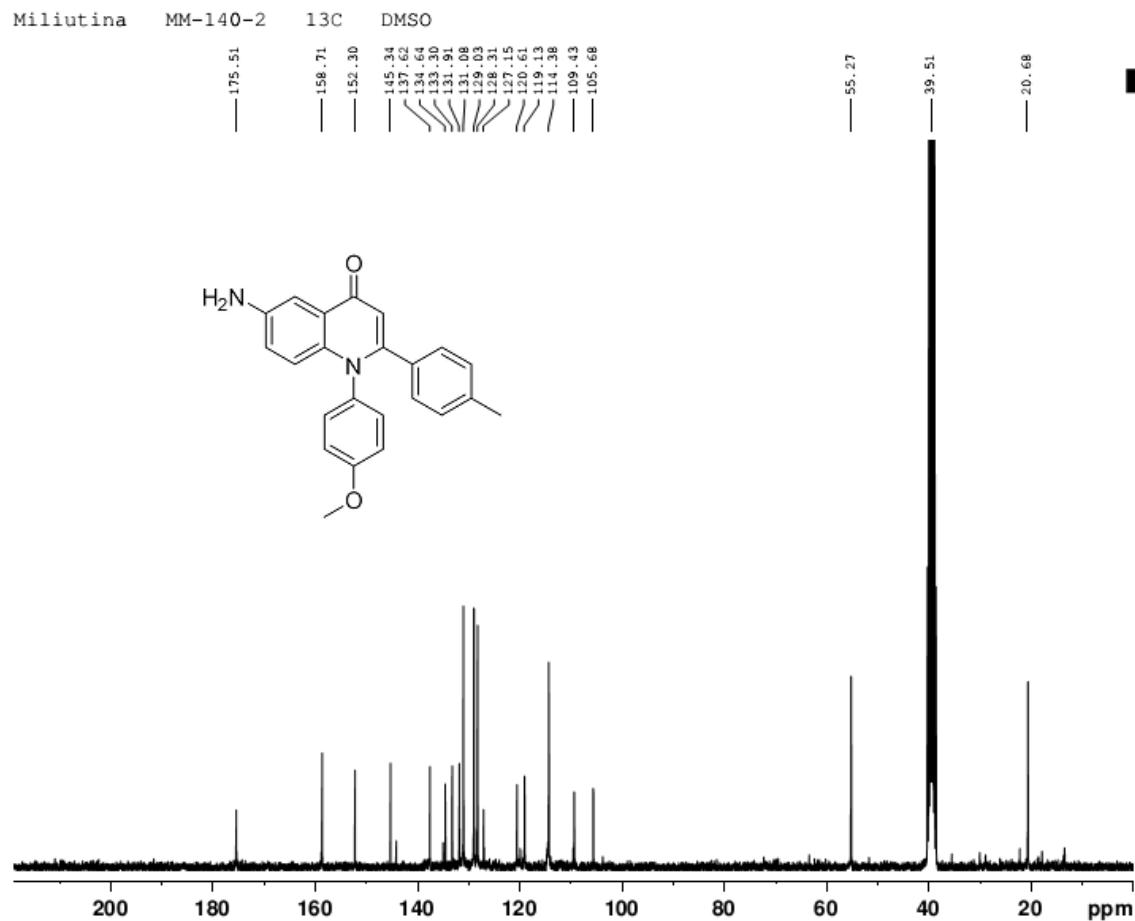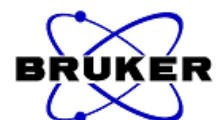

NAME 121121a307  
EXPNO 11  
PROCNO 1  
Date\_ 20121121  
Time 21.35  
INSTRUM spect  
PROBHD 5 mm PABBO BB-  
PULPROG zgpg30  
TD 65536  
SOLVENT DMSO  
NS 1024  
DS 4  
SWH 18028.846 Hz  
FIDRES 0.275098 Hz  
AQ 1.8175818 sec  
RG 2090  
DW 27.733 usec  
DE 10.00 usec  
TE 298.2 K  
D1 2.00000000 sec  
D11 0.03000000 sec  
TD0 1

===== CHANNEL f1 =====  
NUC1 13C  
P1 10.00 usec  
PL1 -0.50 dB  
PL1W 33.25691986 W  
SFO1 75.4752953 MHz

===== CHANNEL f2 =====  
CPDPRG2 waltz16  
NUC2 1H  
PCPD2 72.00 usec  
PL2 0.00 dB  
PL12 17.00 dB  
PL13 17.00 dB  
PL2W 11.25325108 W  
PL12W 0.22453187 W  
PL13W 0.22453187 W  
SFO2 300.1312005 MHz  
SI 32768  
SF 75.4677867 MHz  
WDW EM  
SSB 0  
LB 1.00 Hz  
GB 0  
PC 1.40

6-Amino-1-(3,4-dimethoxyphenethyl)-2-phenylquinolin-4(1H)-one (8bae).

Miliutina, MM-97, DMSO, 1H

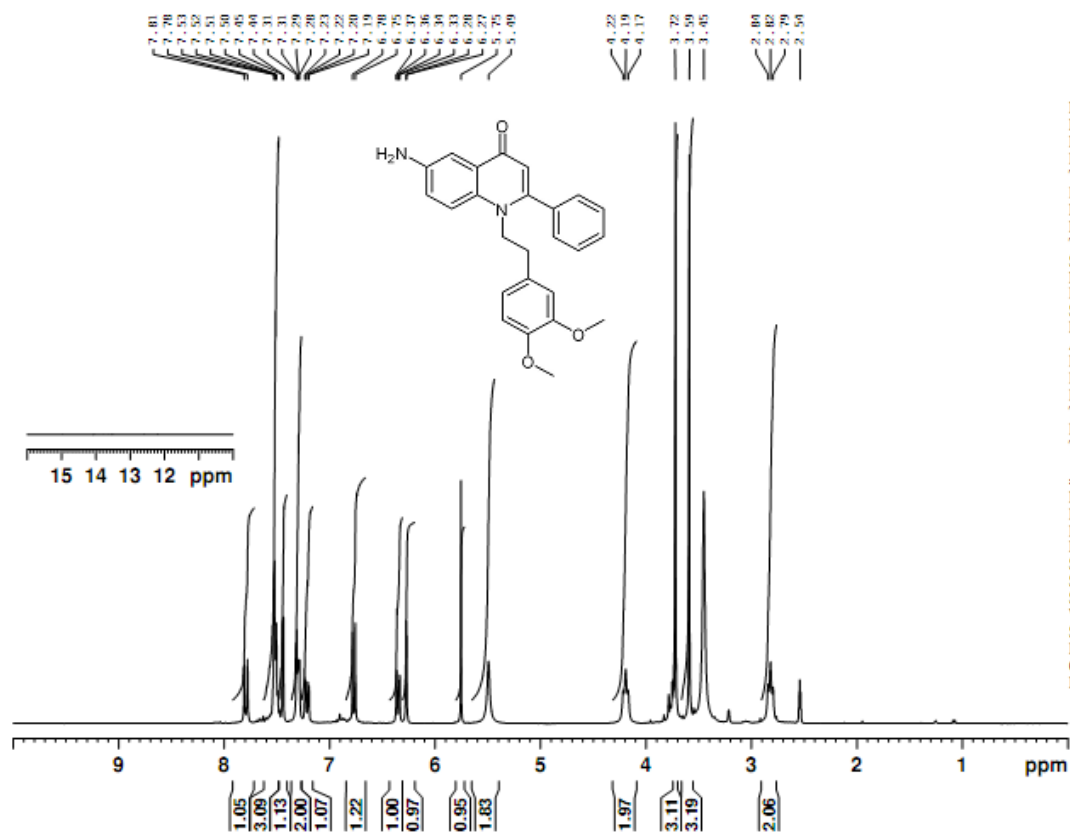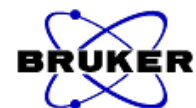

NAME 110803.u316  
 EXPNO 10  
 PROCNO 1  
 Date\_ 20110803  
 Time 15.59  
 INSTRUM spect  
 PROBHD 5 mm PABBO BB-  
 PULPROG zg30  
 TD 65536  
 SOLVENT DMSO  
 NS 16  
 DS 2  
 SWH 6188.119 Hz  
 FIDRES 0.094423 Hz  
 AQ 5.2953587 sec  
 RG 64  
 DW 80.800 usec  
 DE 10.00 usec  
 TE 298.2 K  
 D1 1.00000000 sec  
 TD0 1

===== CHANNEL f1 =====  
 NUC1 1H  
 P1 10.00 usec  
 PL1 0.00 dB  
 PL1W 11.25325108 W  
 SFO1 300.1318534 MHz  
 SI 32768  
 SF 300.1299960 MHz  
 WDW EM  
 SSB 0  
 LB 0.30 Hz  
 GB 0  
 PC 1.00



6-Amino-1-(3,4-dimethoxyphenethyl)-2-phenylquinolin-4(1H)-one (8bae).

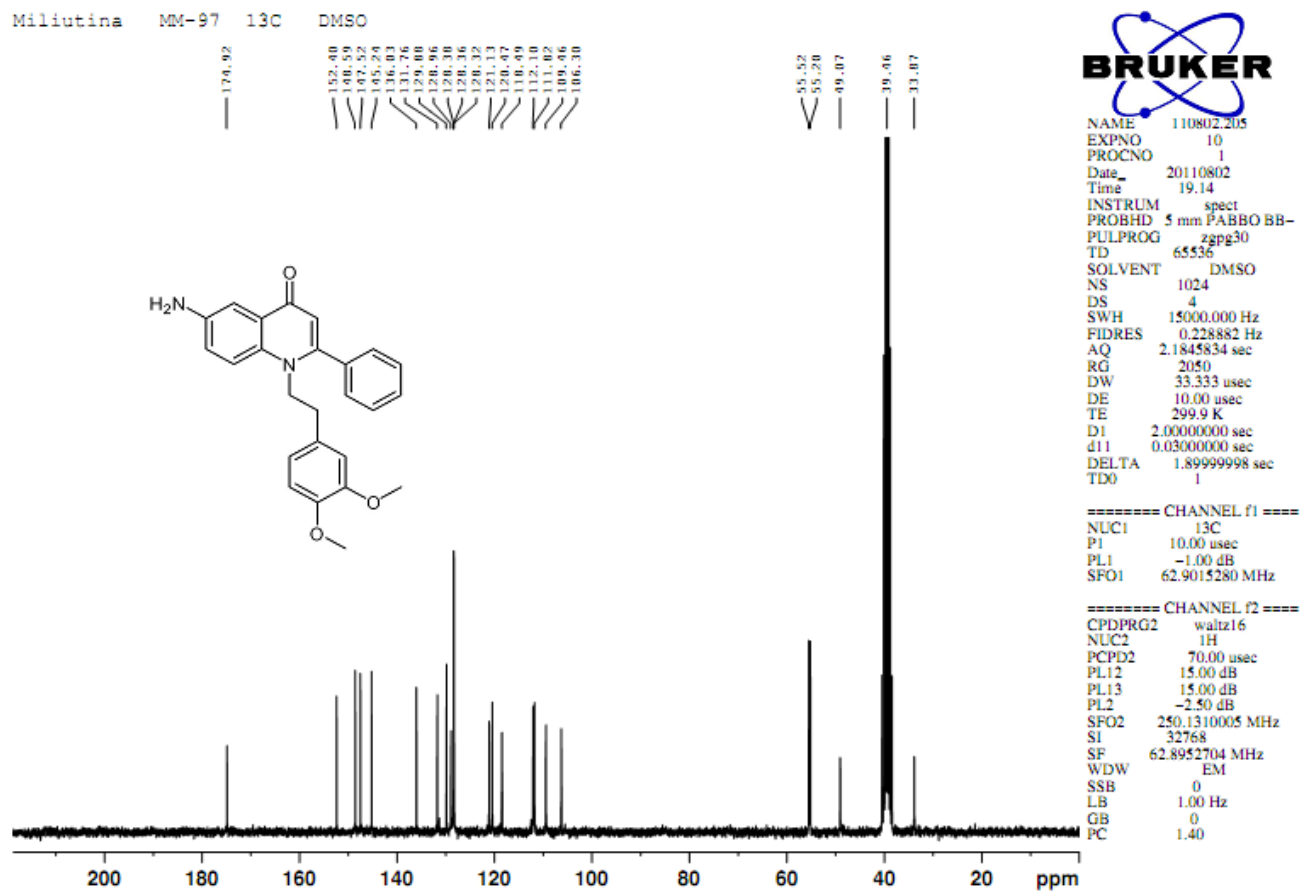

6-Amino-1-phenethyl-2-phenylquinolin-4(1H)-one (8bc9).

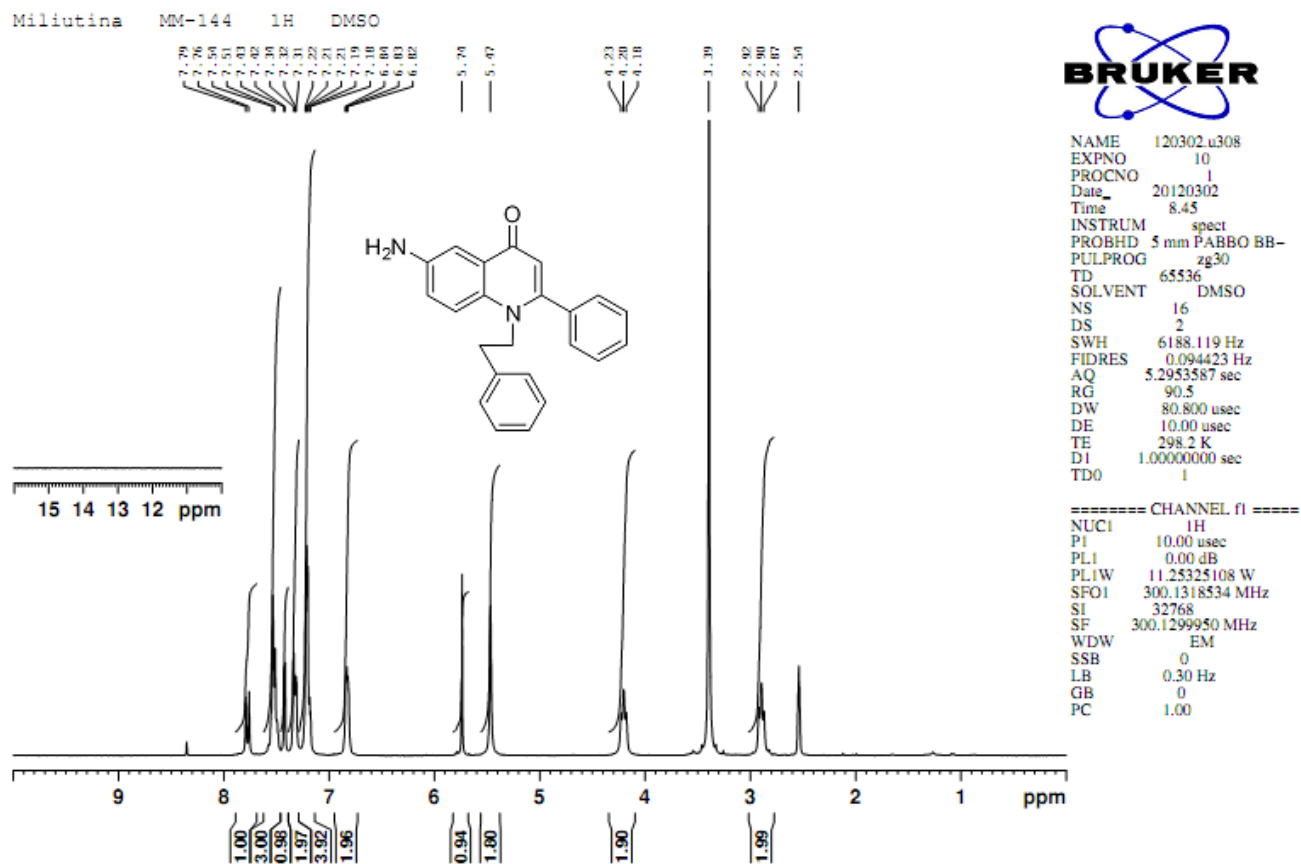

6-Amino-1-phenethyl-2-phenylquinolin-4(1H)-one (8bc9).

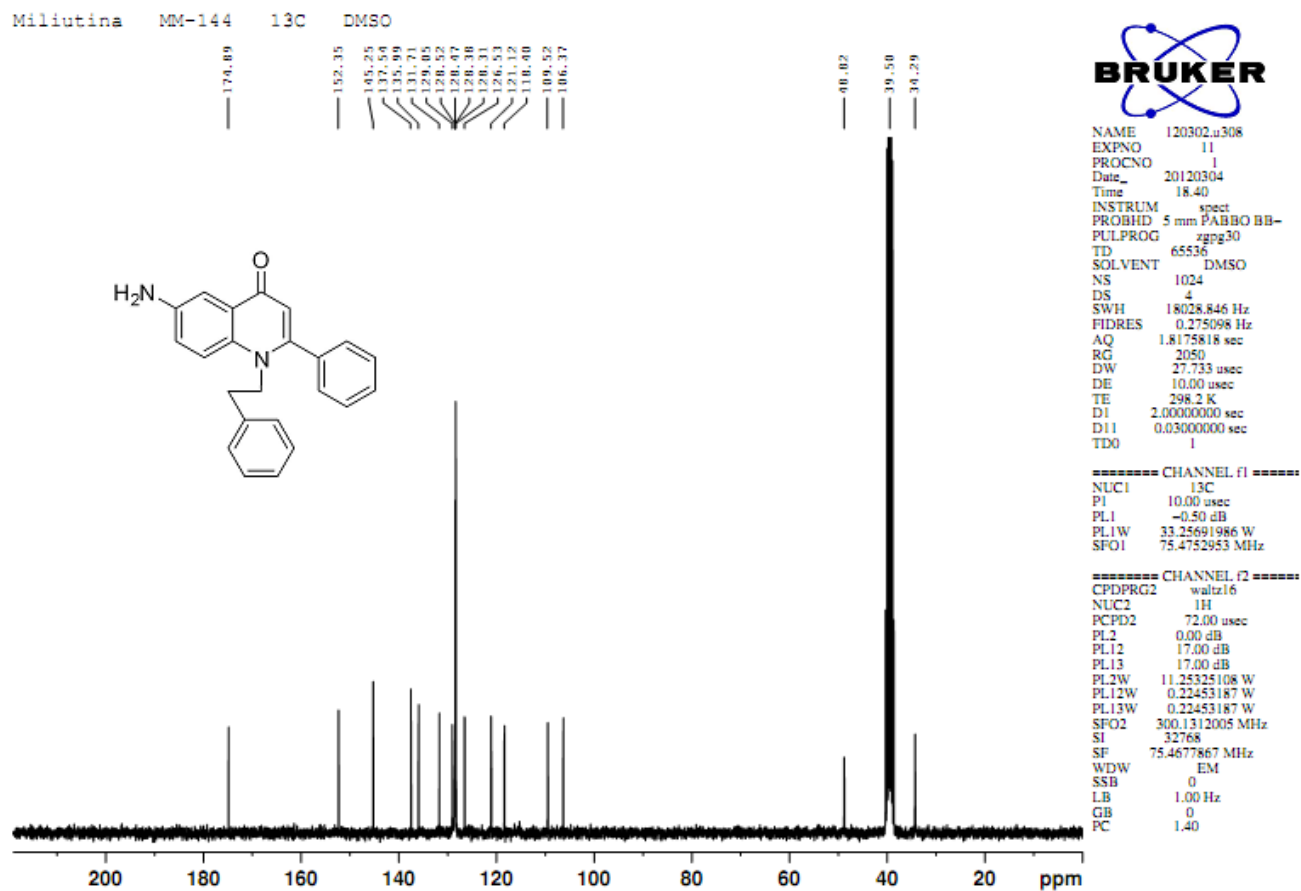

6-Amino-1-phenethyl-2-phenylquinolin-4(1H)-one (8bdq).

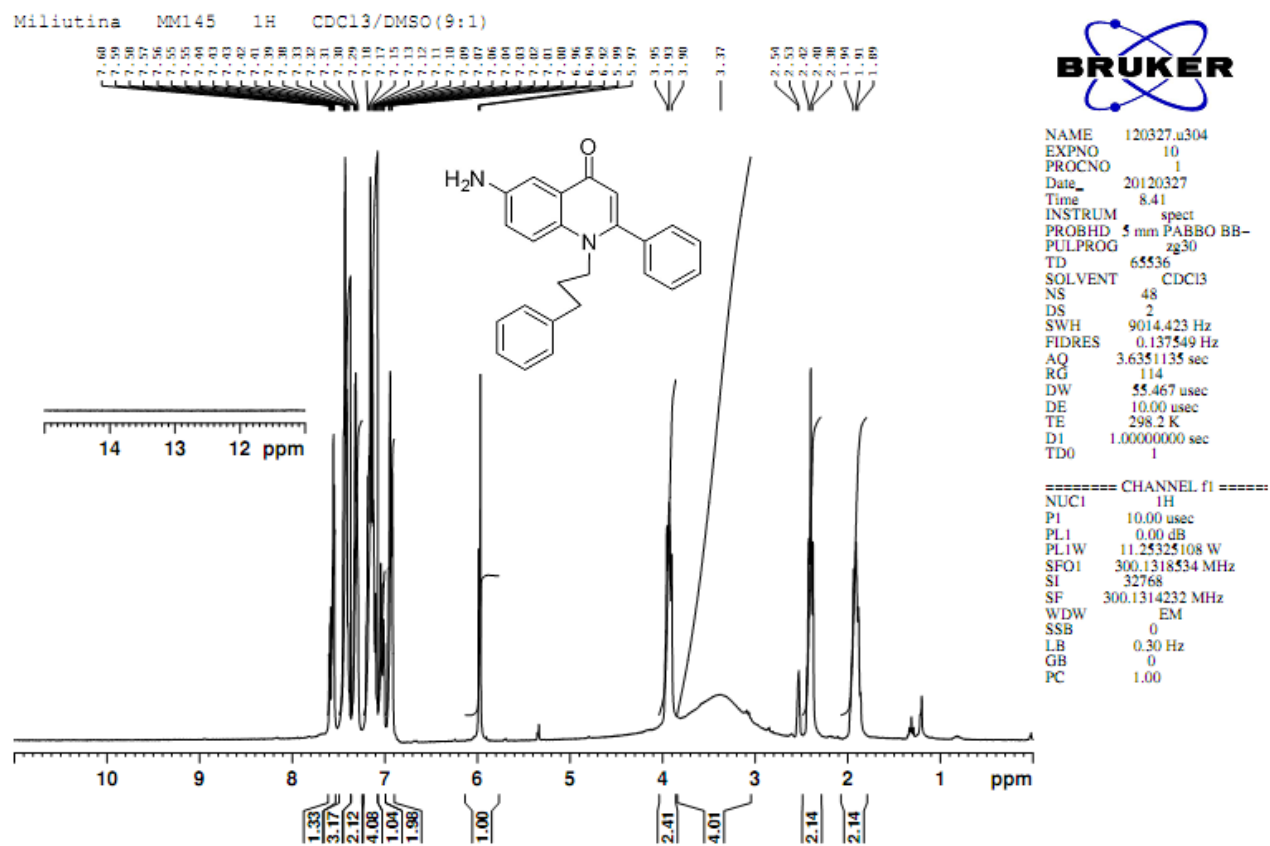

## 6-Amino-1-phenethyl-2-phenylquinolin-4(1H)-one (8bdq).

Miliutina MM145 13C CDC13/DMSO(9:1)

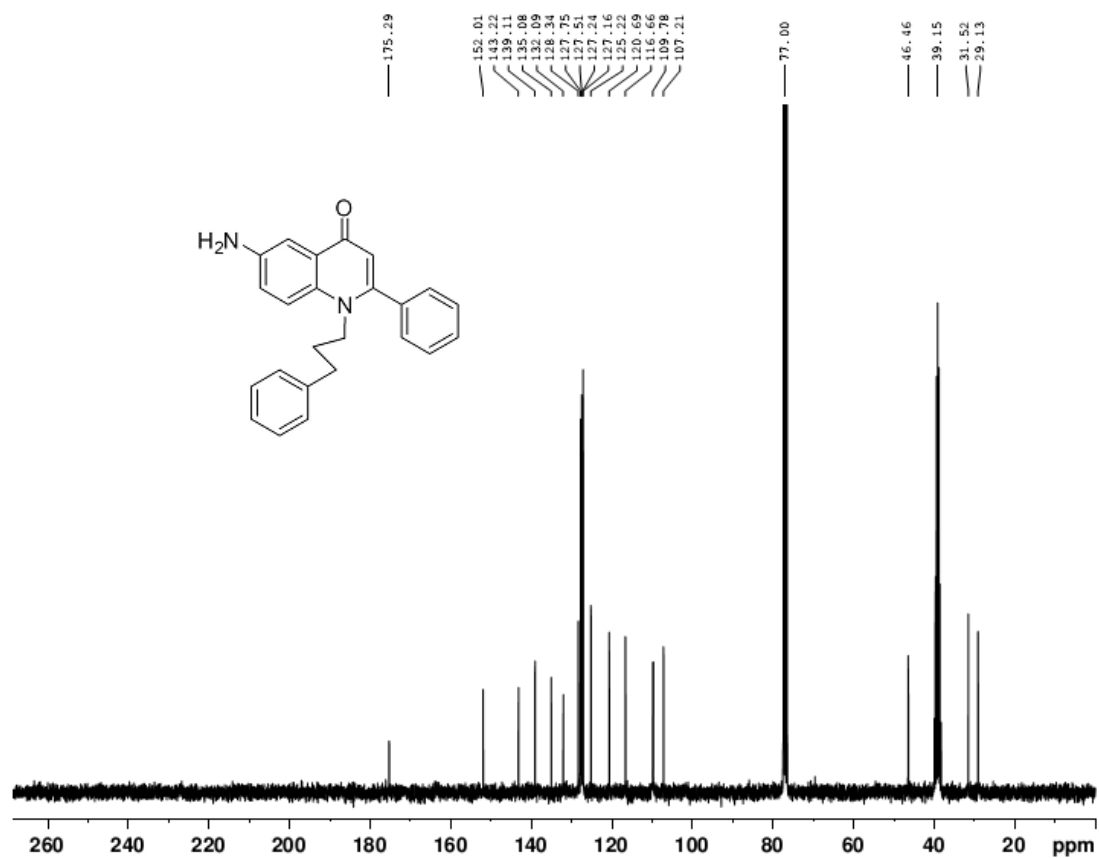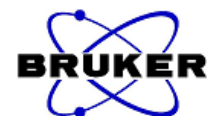

NAME 13152 / m. 204  
 EXPNO 11  
 PROCNO 1  
 Date\_ 20120327  
 Time 23.22  
 INSTRUM spect  
 PROBHD 5 mm PABBO BB-  
 PULPROG zgpg30  
 TD 65536  
 SOLVENT CDCl3  
 NS 1600  
 DS 4  
 SWH 26315.789 Hz  
 FIDRES 0.401547 Hz  
 AQ 1.2452340 sec  
 RG 2050  
 DW 19.000 usec  
 DE 10.00 usec  
 TE 298.2 K  
 D1 2.0000000 sec  
 D11 0.0300000 sec  
 TD0 1

==== CHANNEL f1 ====  
 NUC1 13C  
 P1 10.00 usec  
 PL1 -45.0 dB  
 PL1W 33.25691986 W  
 SFO1 75.4752953 MHz

==== CHANNEL f2 ====  
 CPDPRG2 waltz16  
 NUC2 1H  
 PCPD2 72.00 usec  
 PL2 0.00 dB  
 PL12 17.00 dB  
 PL13 17.00 dB  
 PL2W 11.25325108 W  
 PL12W 0.22453187 W  
 PL13W 0.22453187 W  
 SFO2 300.1312005 MHz  
 SI 32768  
 SF 75.4681804 MHz  
 WDW EM  
 SSB 0  
 LB 100 Hz  
 GB 0  
 PC 1.40

6-Amino-1-heptyl-2-phenylquinolin-4(1H)-one (8ber).

Miliutina MM-96 1H DMSO

7.62  
7.58  
7.55  
7.51  
7.50  
7.39  
7.38  
7.15  
7.14  
7.12

5.79

4.02  
3.99  
3.97

3.54  
3.43

2.54

1.57  
1.17  
1.15  
1.13  
1.03  
0.81  
0.79

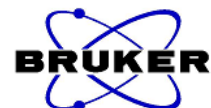

NAME 110801.u327  
EXPNO 10  
PROCNO 1  
Date\_ 20110801  
Time 15.32  
INSTRUM spect  
PROBHD 5 mm PABBO BB-  
PULPROG zg30  
TD 65536  
SOLVENT DMSO  
NS 16  
DS 2  
SWH 6188.119 Hz  
FIDRES 0.094423 Hz  
AQ 5.2953587 sec  
RG 90.5  
DW 80.800 usec  
DE 10.00 usec  
TE 298.2 K  
D1 1.00000000 sec  
TD0 1

===== CHANNEL f1 =====  
NUC1 1H  
P1 10.00 usec  
PL1 0.00 dB  
PL1W 11.25325108 W  
SFO1 300.1318534 MHz  
SI 32768  
SF 300.1300000 MHz  
WDW EM  
SSB 0  
LB 0.30 Hz  
GB 0  
PC 1.00

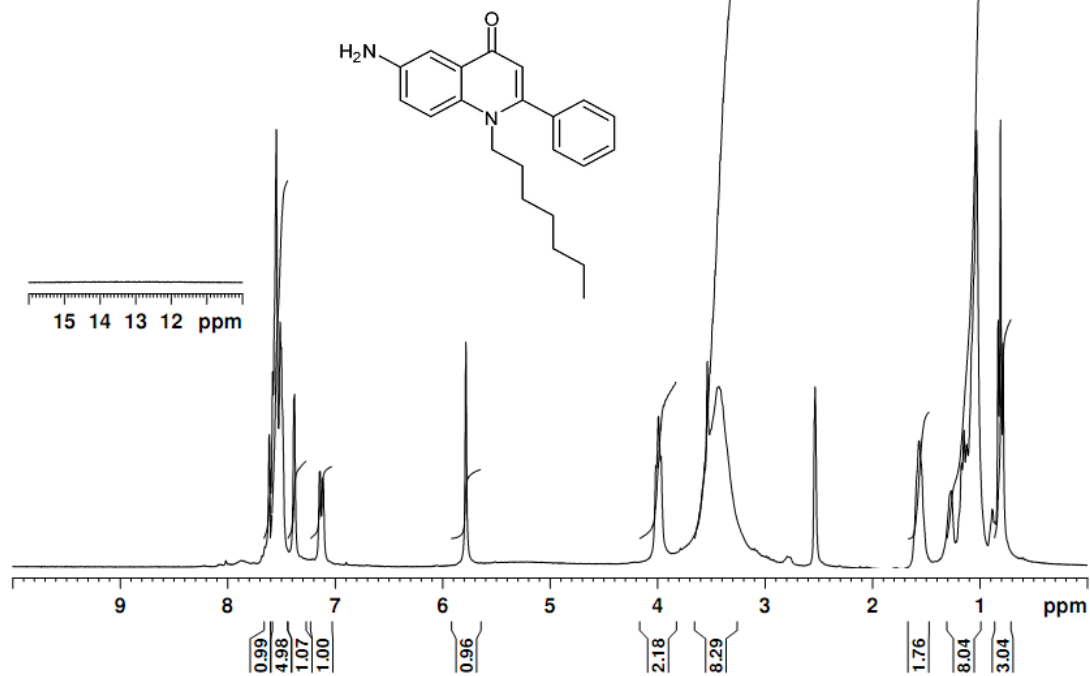

6-Amino-1-heptyl-2-phenylquinolin-4(1H)-one (8ber).

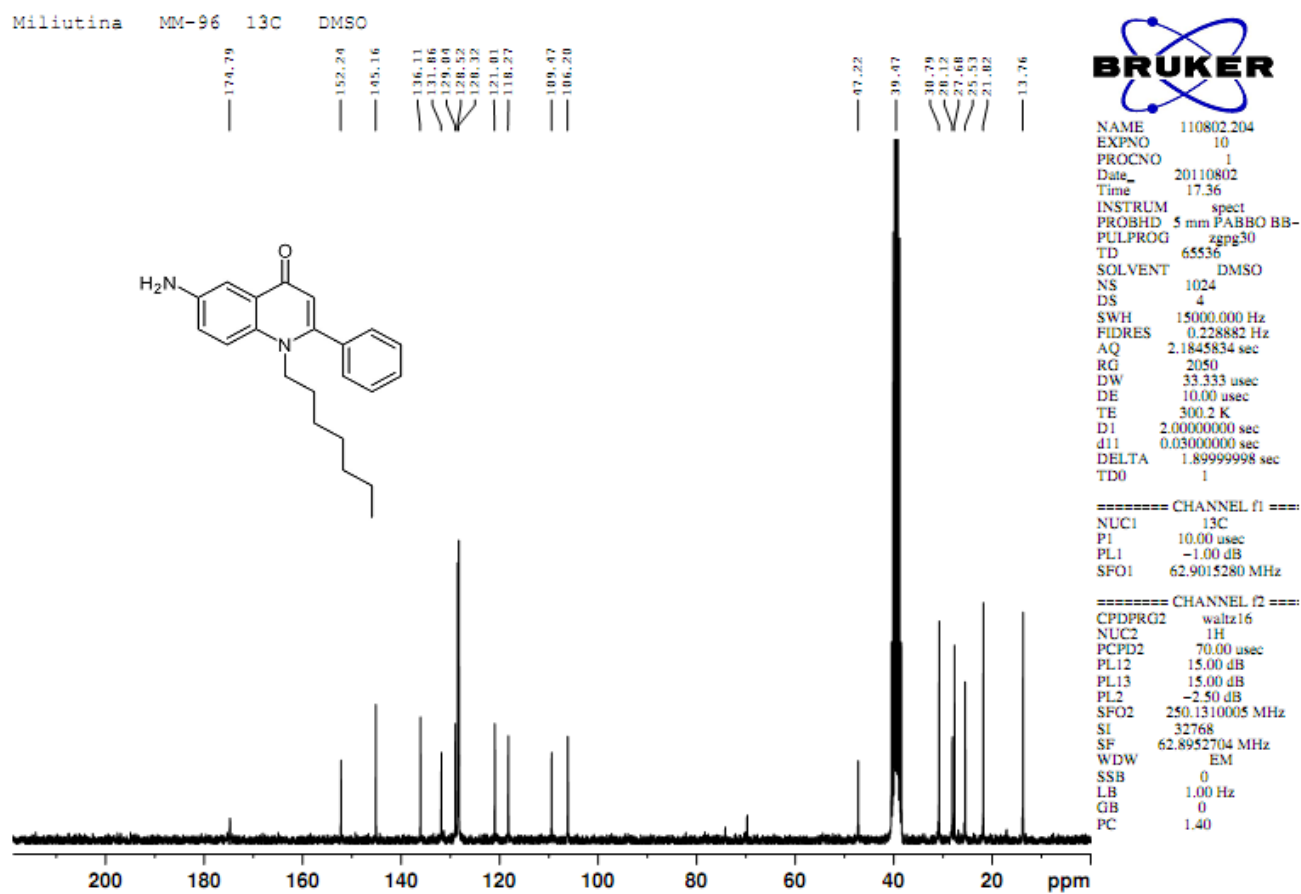

6-Amino-1-cyclohexyl-2-phenylquinolin-4(1H)-one (8bfs).

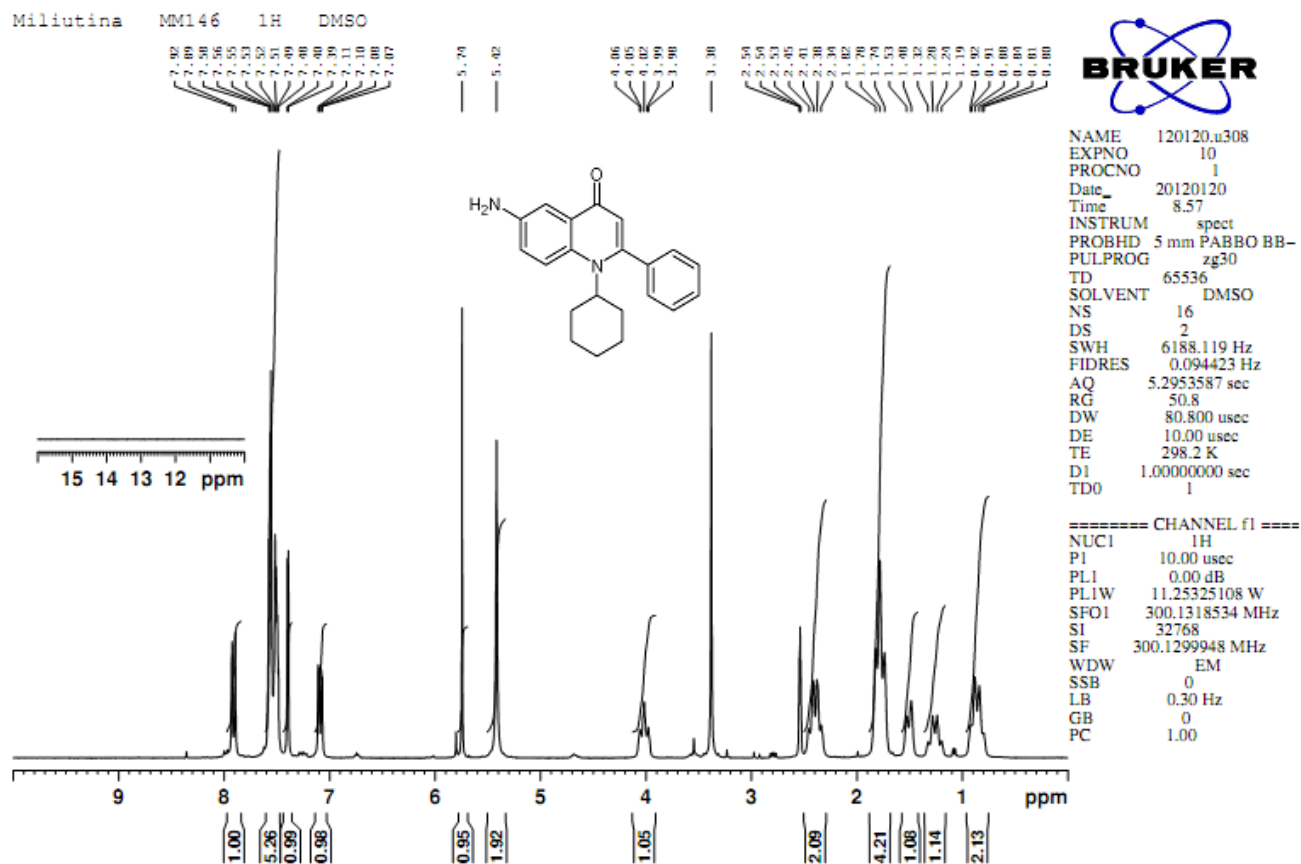



6-Amino-1-cyclohexyl-2-phenylquinolin-4(1H)-one (8bfs).

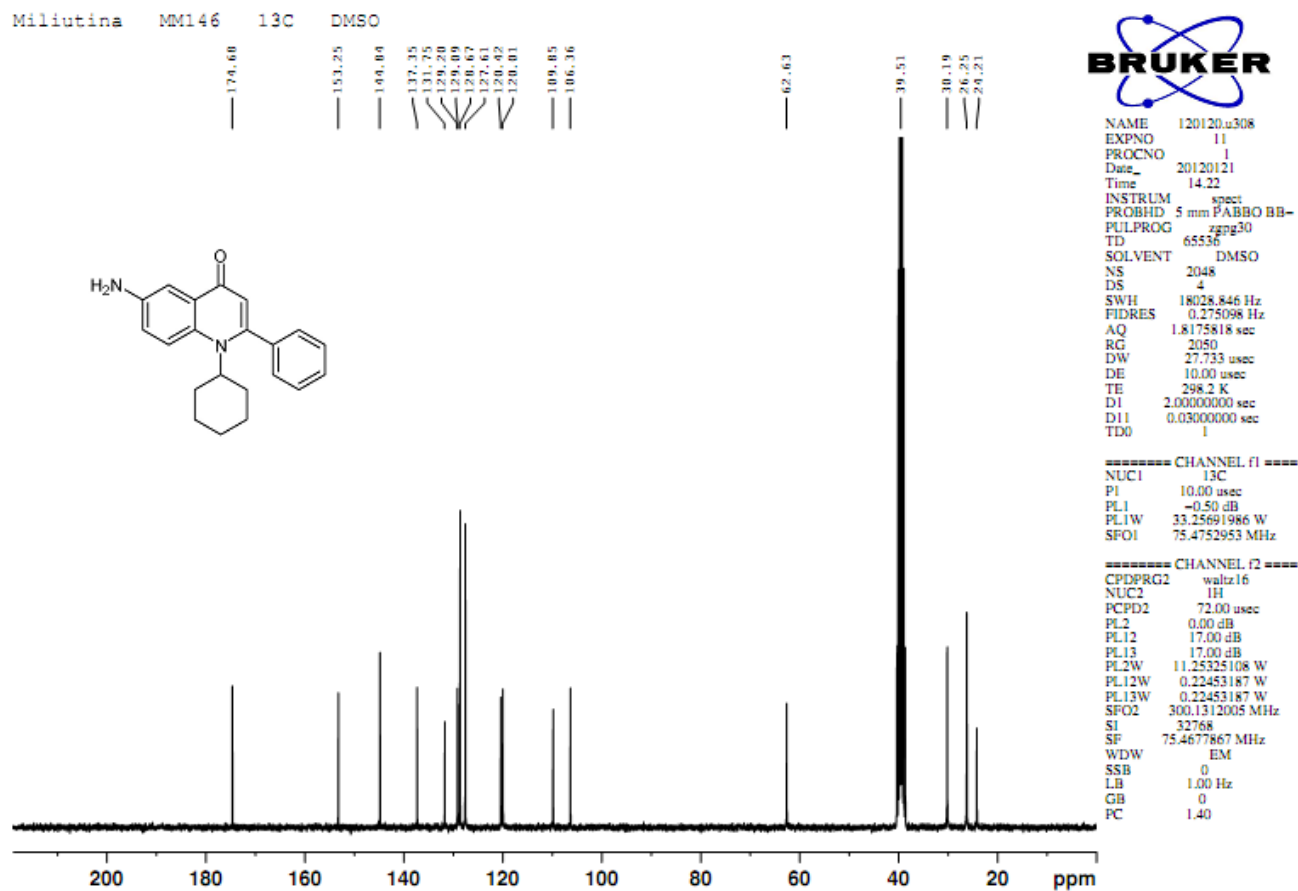

## 6-Amino-1-hexyl-2-phenylquinolin-4(1H)-one (8bgt).

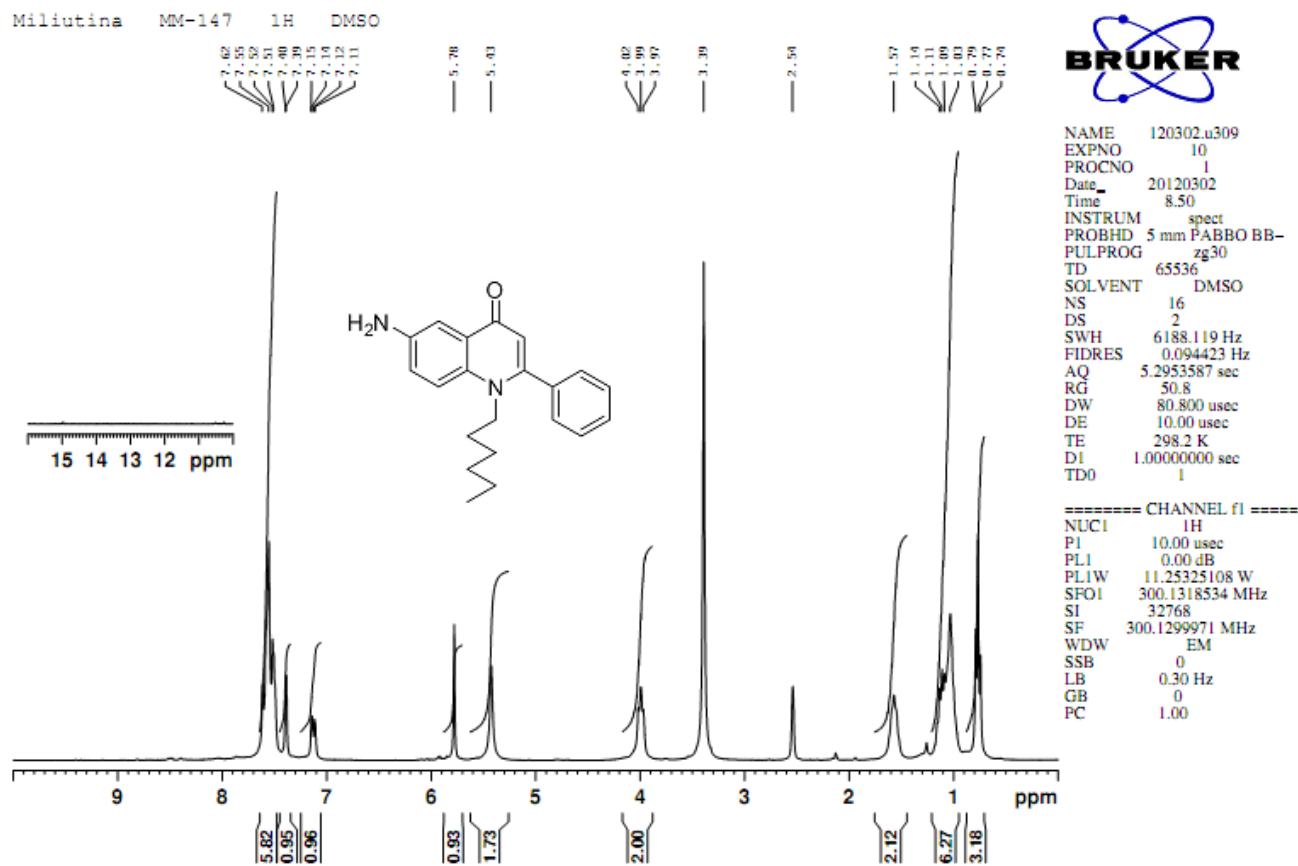

## 6-Amino-1-hexyl-2-phenylquinolin-4(1H)-one (8bgt).

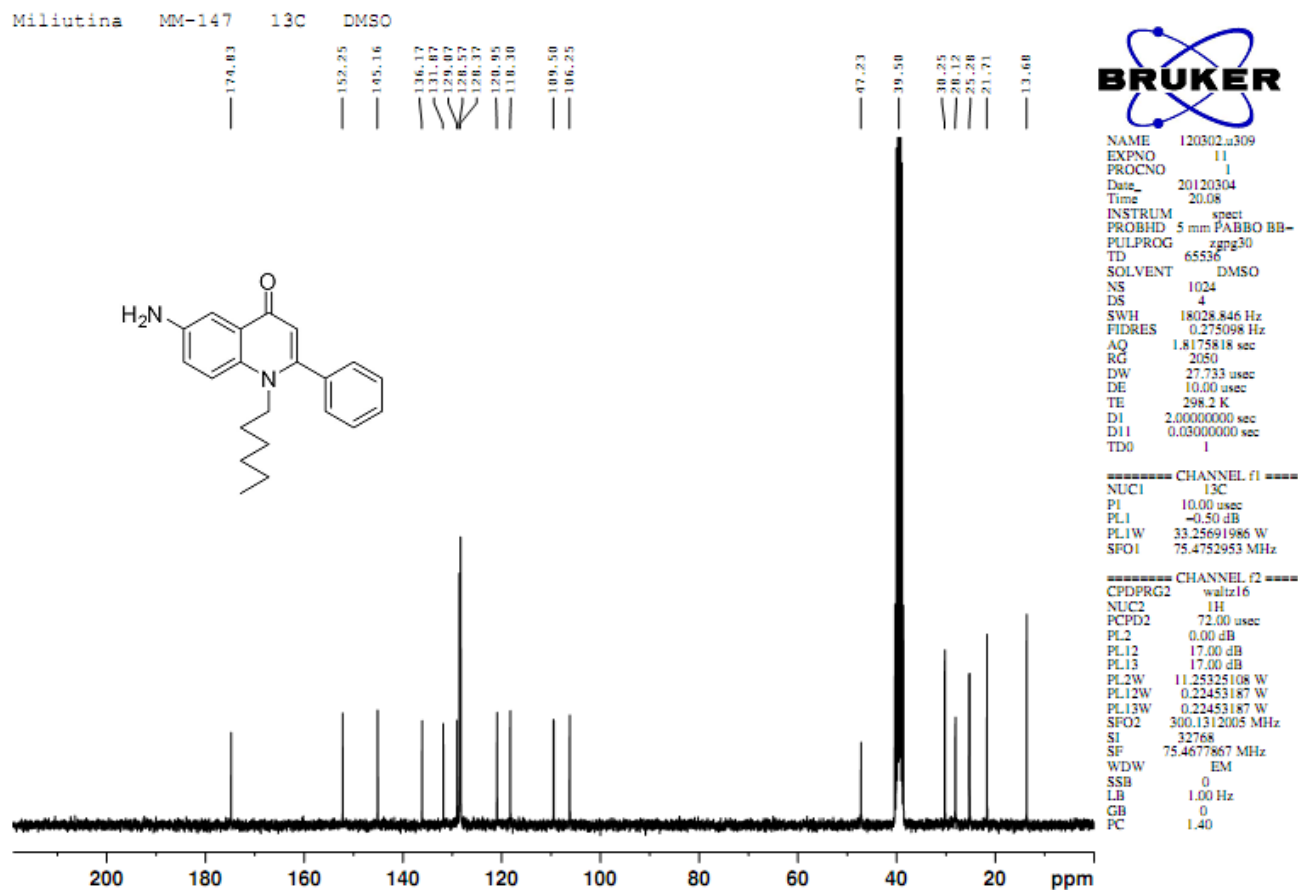

6-Amino-2-butyl-1-(3,4-dimethoxyphenethyl)quinolin-4(1H)-one (8ca<sup>+</sup>).

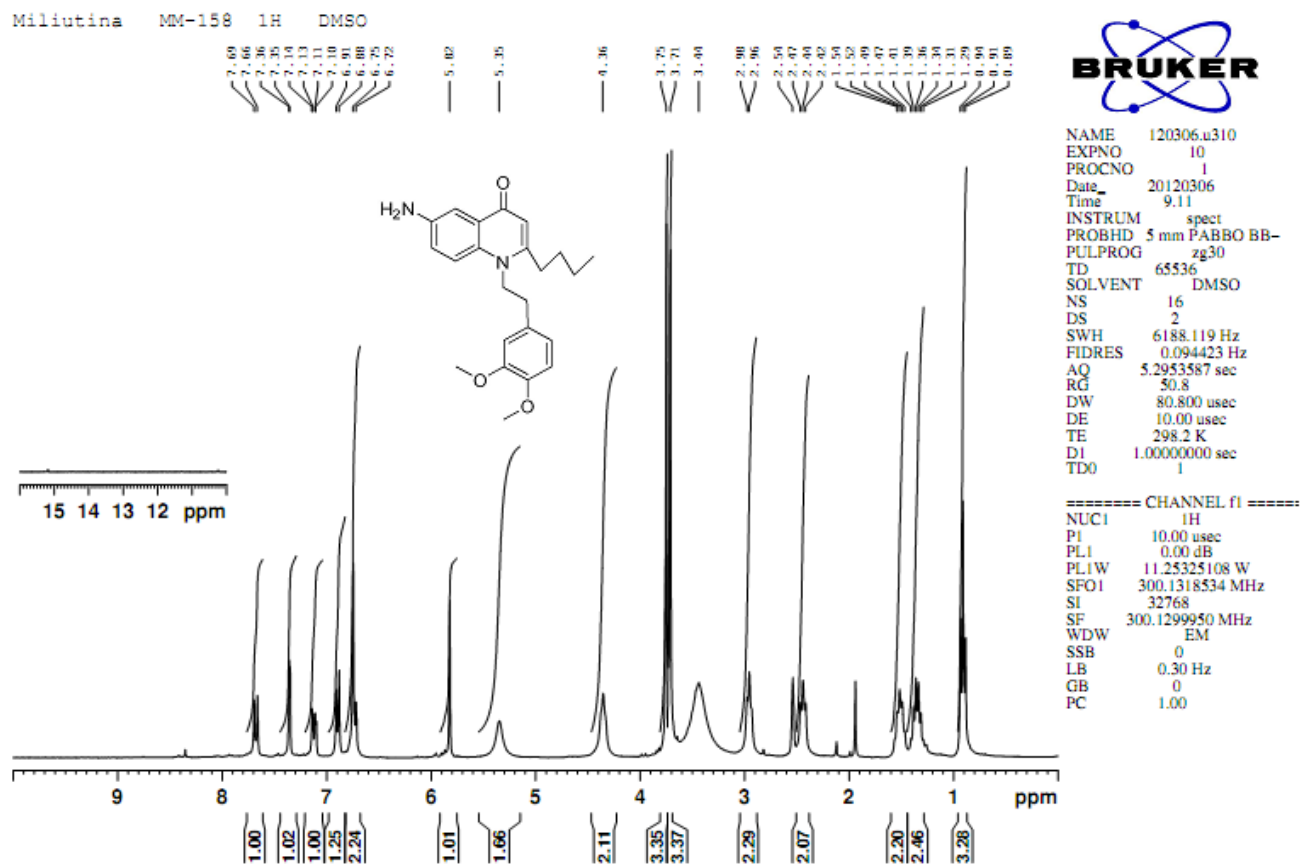

6-Amino-2-butyl-1-(3,4-dimethoxyphenethyl)quinolin-4(1H)-one (8ca<sup>+</sup>).

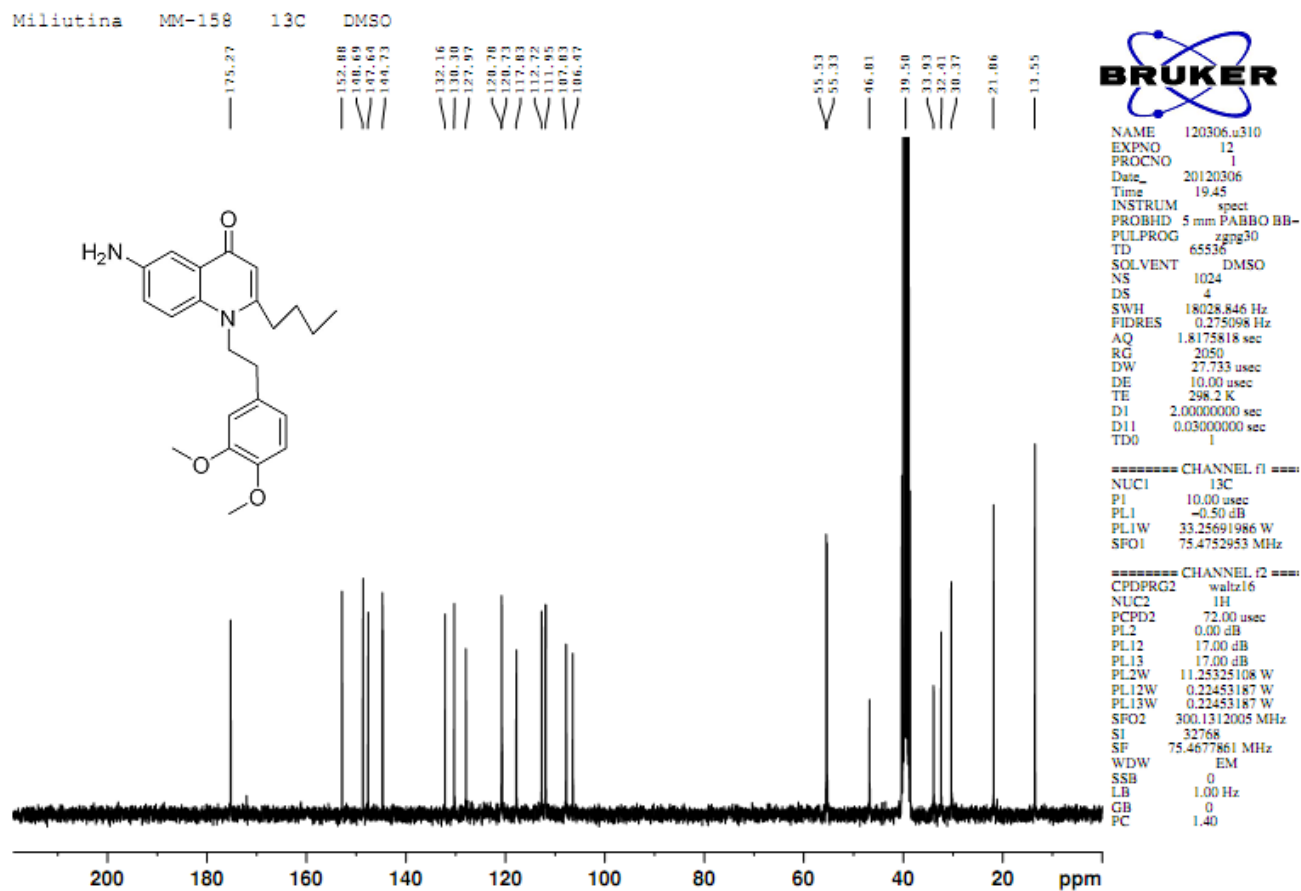

6-Amino-1-(3,4-dimethoxyphenethyl)-2-pentylquinolin-4(1H)-one (8da<sup>+</sup>).

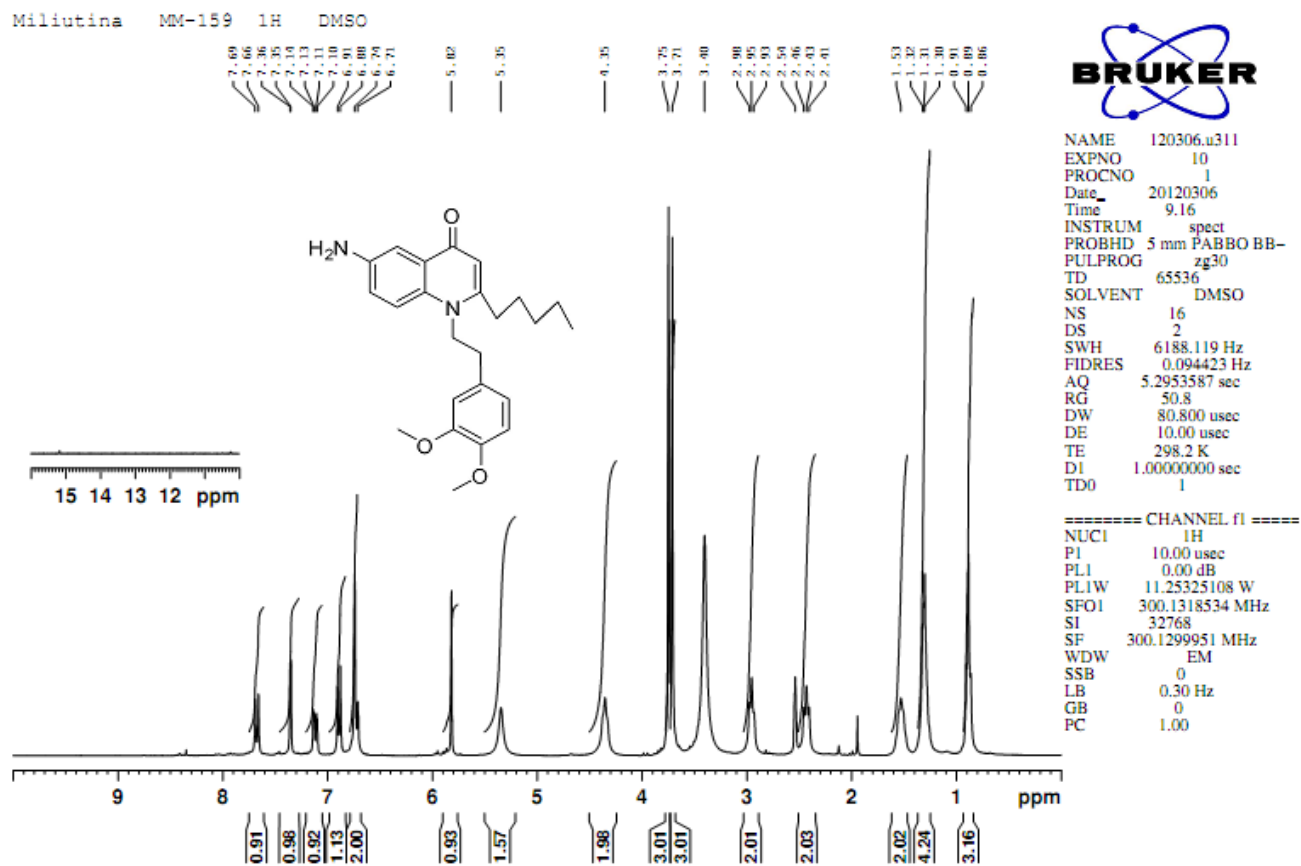

6-Amino-1-(3,4-dimethoxyphenethyl)-2-pentylquinolin-4(1H)-one (8da<sup>+</sup>).

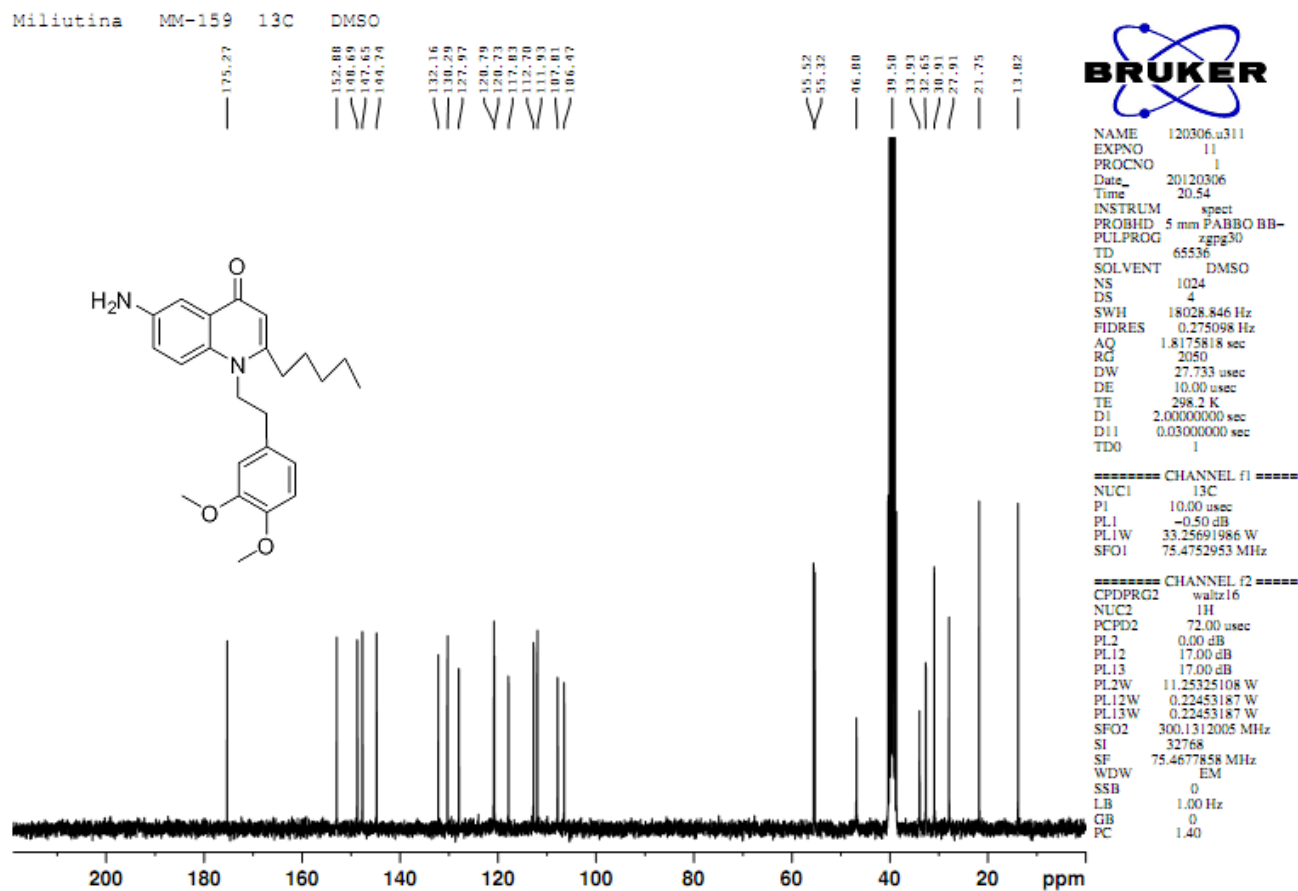

6-Amino-1-(4-methoxybenzyl)-2-pentylquinolin-4(1H)-one (8wdb).

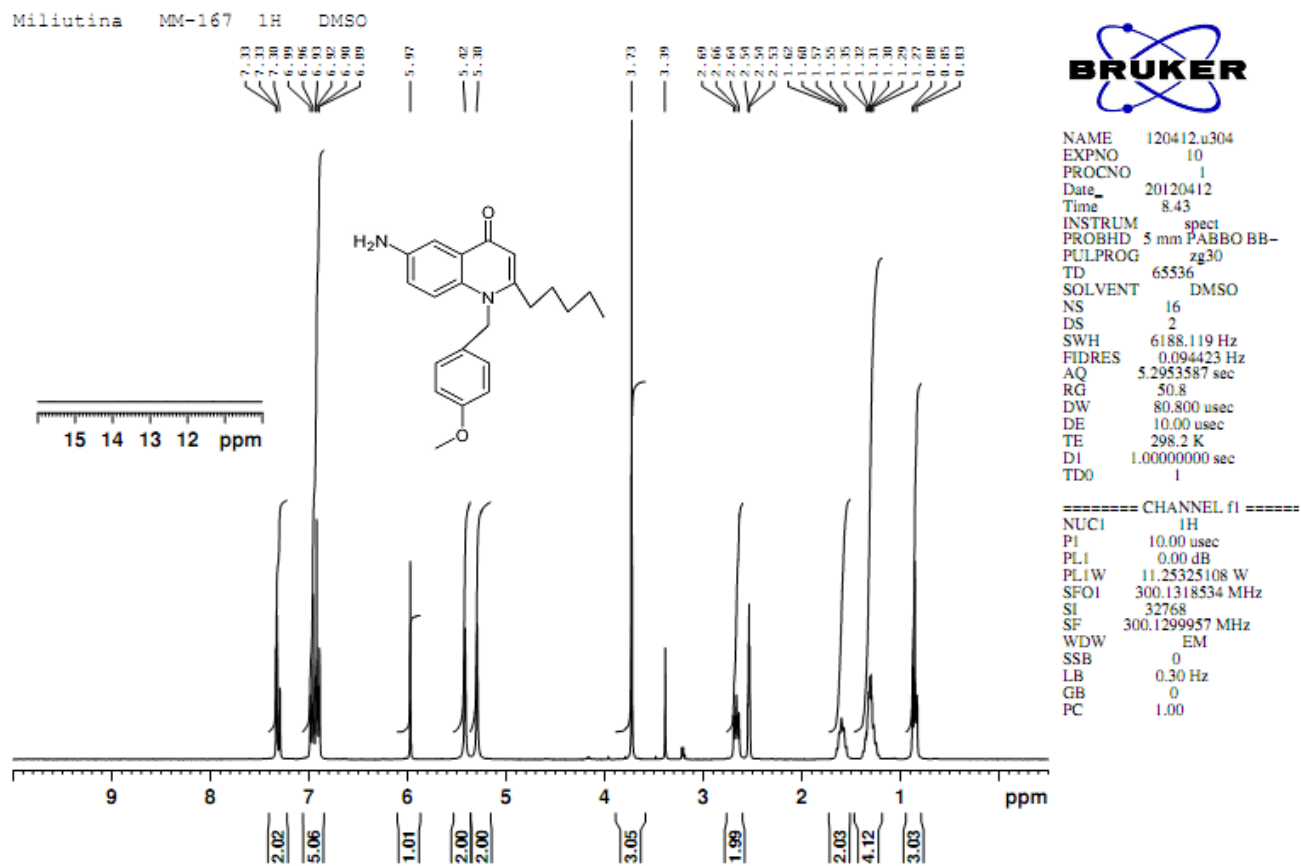



## 6-Amino-1-(4-methoxybenzyl)-2-pentylquinolin-4(1H)-one (8wdb).

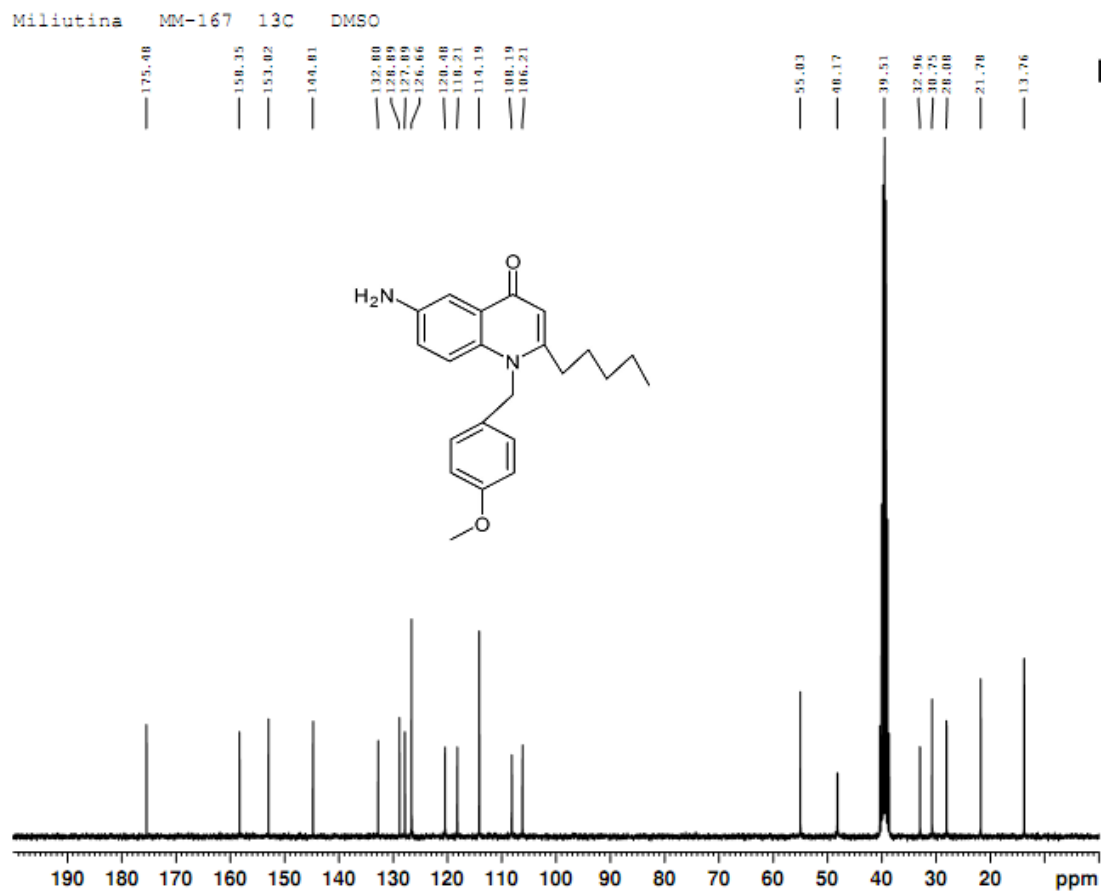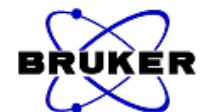

NAME 120412.u304  
 EXPNO 12  
 PROCNO 1  
 Date\_ 20120412  
 Time 12.23  
 INSTRUM spect  
 PROBHD 5 mm PABBO BB-  
 PULPROG zgpg30  
 TD 65536  
 SOLVENT DMSO  
 NS 1024  
 DS 4  
 SWH 18028.846 Hz  
 FIDRES 0.275098 Hz  
 AQ 1.8175818 sec  
 RG 2040  
 DW 27.733 usec  
 DE 10.00 usec  
 TE 298.2 K  
 D1 2.00000000 sec  
 D11 0.03000000 sec  
 TD0 1

----- CHANNEL f1 -----  
 NUC1 13C  
 P1 10.00 usec  
 PL1 -0.50 dB  
 PL1W 33.25691986 W  
 SFO1 75.4752943 MHz

----- CHANNEL f2 -----  
 CPDPRG2 waltz16  
 NUC2 1H  
 PCPD2 72.00 usec  
 PL2 0.00 dB  
 PL12 17.00 dB  
 PL13 17.00 dB  
 PL2W 11.25324108 W  
 PL12W 0.22443187 W  
 PL13W 0.22443187 W  
 SFO2 300.1312005 MHz  
 SI 32768  
 SF 75.4677867 MHz  
 WDW EM  
 SSB 0  
 LB 1.00 Hz  
 GB 0  
 PC 1.40

(Z)-3-(4-Methoxybenzylamino)-1-(2-(4-methoxybenzylamino)-5-nitrophenyl)-3-*p*-tolylprop-2-en-1-one (9a).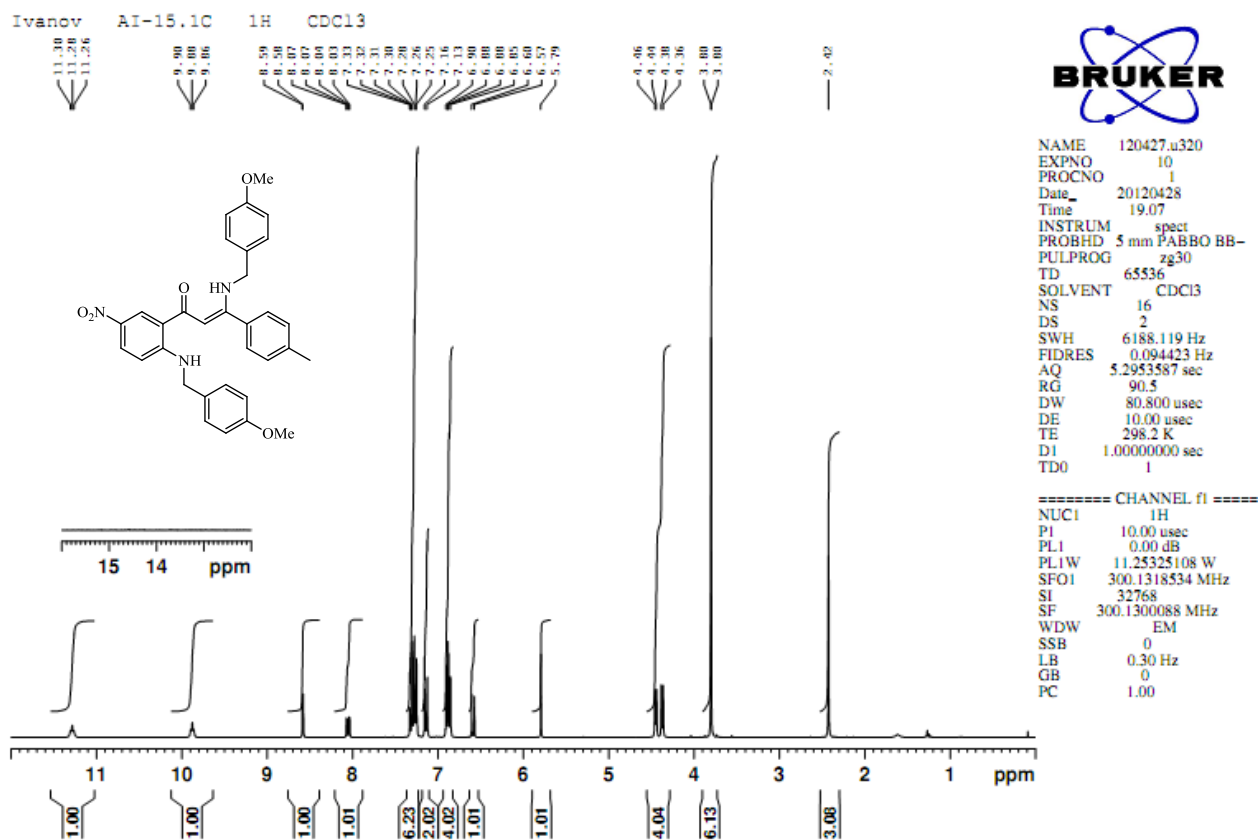

(Z)-3-(4-Methoxybenzylamino)-1-(2-(4-methoxybenzylamino)-5-nitrophenyl)-3-*p*-tolylprop-2-en-1-one (9a).

Ivanov AI-15.1C 13C CDCl3

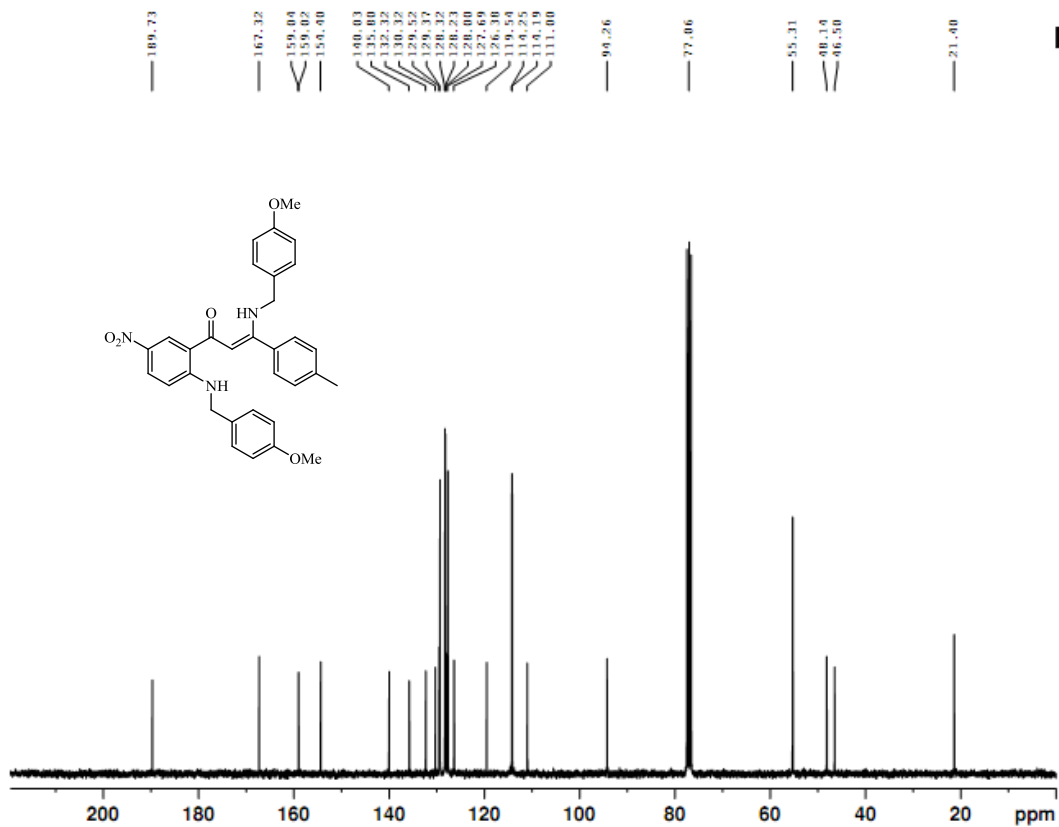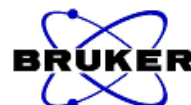

NAME 120427.d320  
 EXPNO 12  
 PROCNO 1  
 Date\_ 20120428  
 Time 20.31  
 INSTRUM spect  
 PROBHD 5 mm PABBO BB-  
 PULPROG zgpg30  
 TD 65536  
 SOLVENT CDCl3  
 NS 1024  
 DS 4  
 SWH 18028.846 Hz  
 FIDRES 0.234098 Hz  
 AQ 1.8175818 sec  
 RG 2050  
 DW 27.733 usec  
 DE 10.00 usec  
 TE 298.4 K  
 D1 2.00000000 sec  
 D11 0.03000000 sec  
 TD0 1

----- CHANNEL f1 -----  
 NUC1 13C  
 P1 10.00 usec  
 PL1 -0.50 dB  
 PL1W 33.25691986 W  
 SFO1 75.4752953 MHz

----- CHANNEL f2 -----  
 CPDPRG2 waltz16  
 NUC2 1H  
 PCPD2 72.00 usec  
 PL2 0.00 dB  
 PL12 17.00 dB  
 PL13 17.00 dB  
 PL2W 11.24324108 W  
 PL12W 0.22453187 W  
 PL13W 0.22453187 W  
 SFO2 300.1312005 MHz  
 SI 32768  
 SF 75.4677490 MHz  
 WDW EM  
 SSB 0  
 LB 1.00 Hz  
 GB 0  
 PC 1.40

**(Z)-3-(Isopropylamino)-1-(2-(isopropylamino)-5-nitrophenyl)-3-*p*-tolylprop-2-en-1-one (9b).**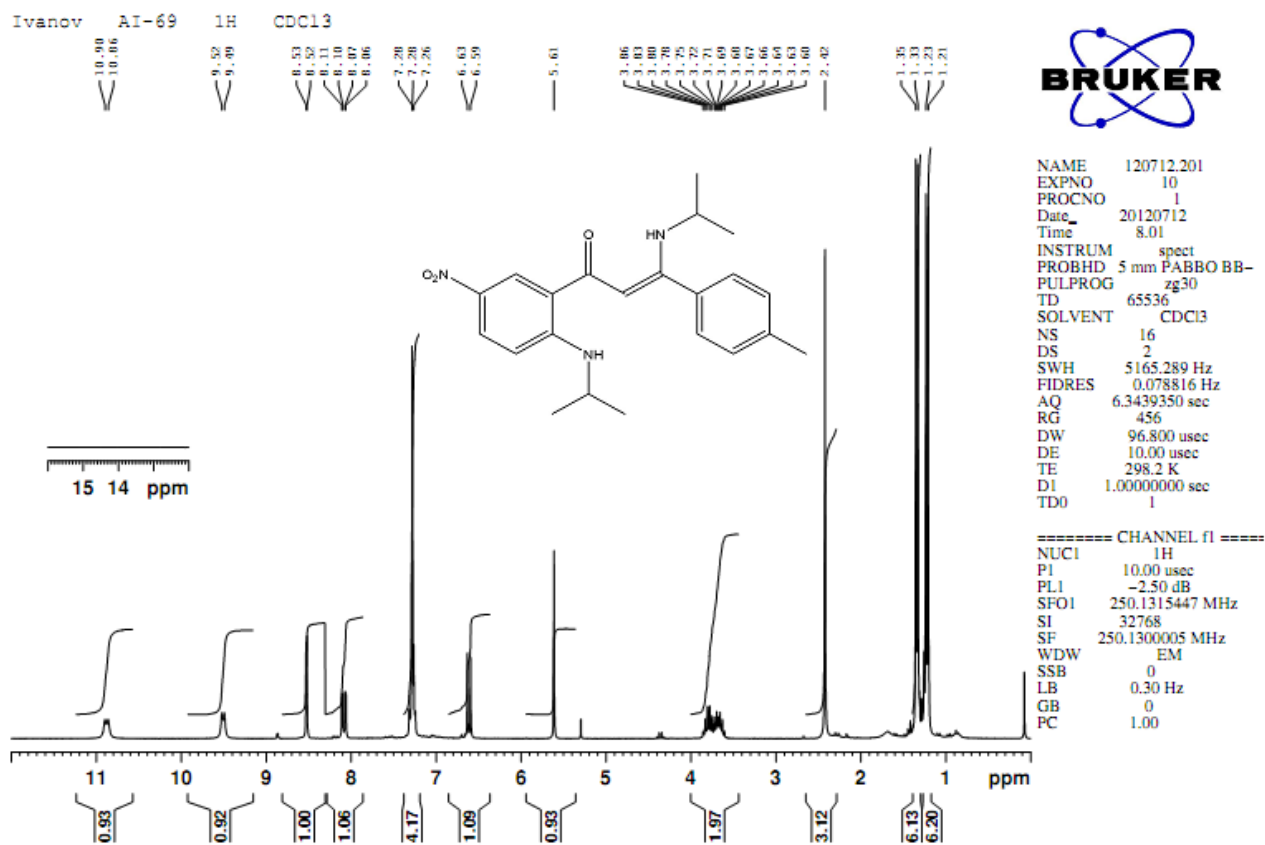

(Z)-3-(Isopropylamino)-1-(2-(isopropylamino)-5-nitrophenyl)-3-*p*-tolylprop-2-en-1-one (9b).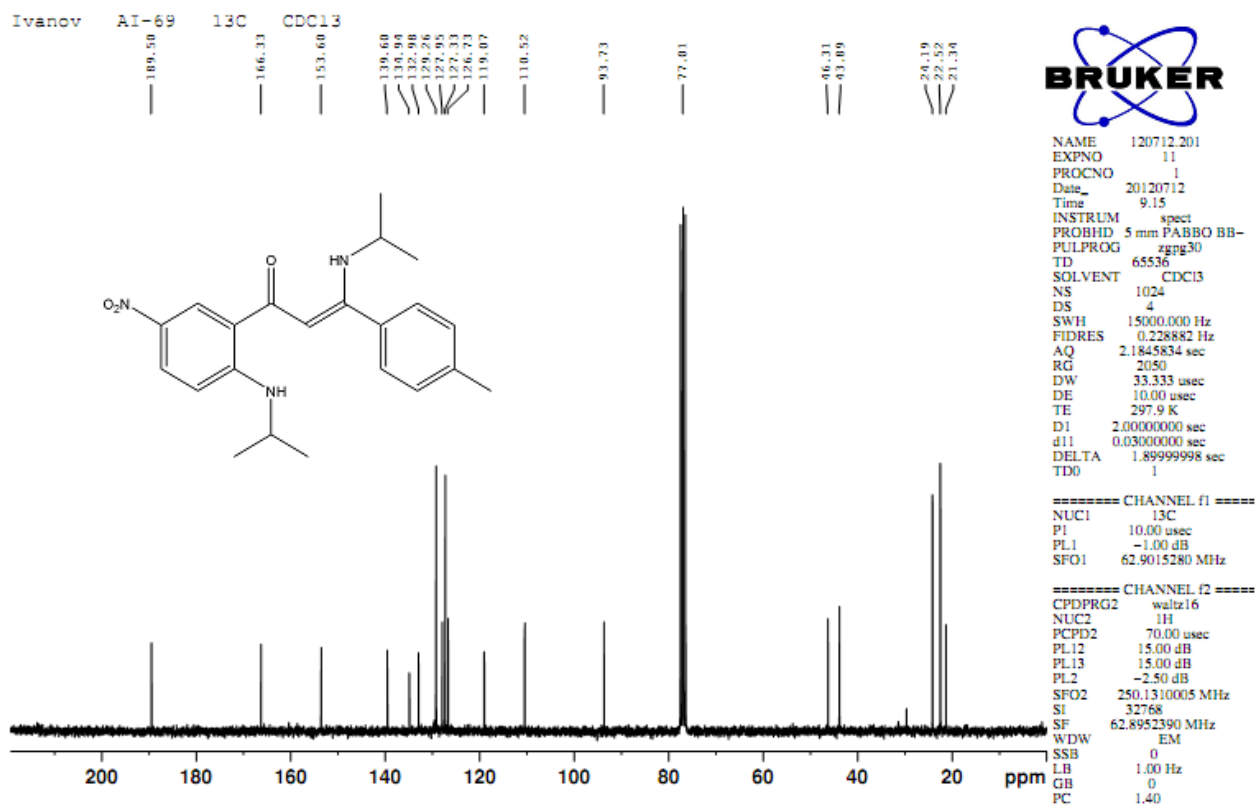

(Z)-3-(3,4-Dimethoxyphenethylamino)-1-(2-(3,4-dimethoxyphenethylamino)-5-nitrophenyl)hept-2-en-1-one (9c).

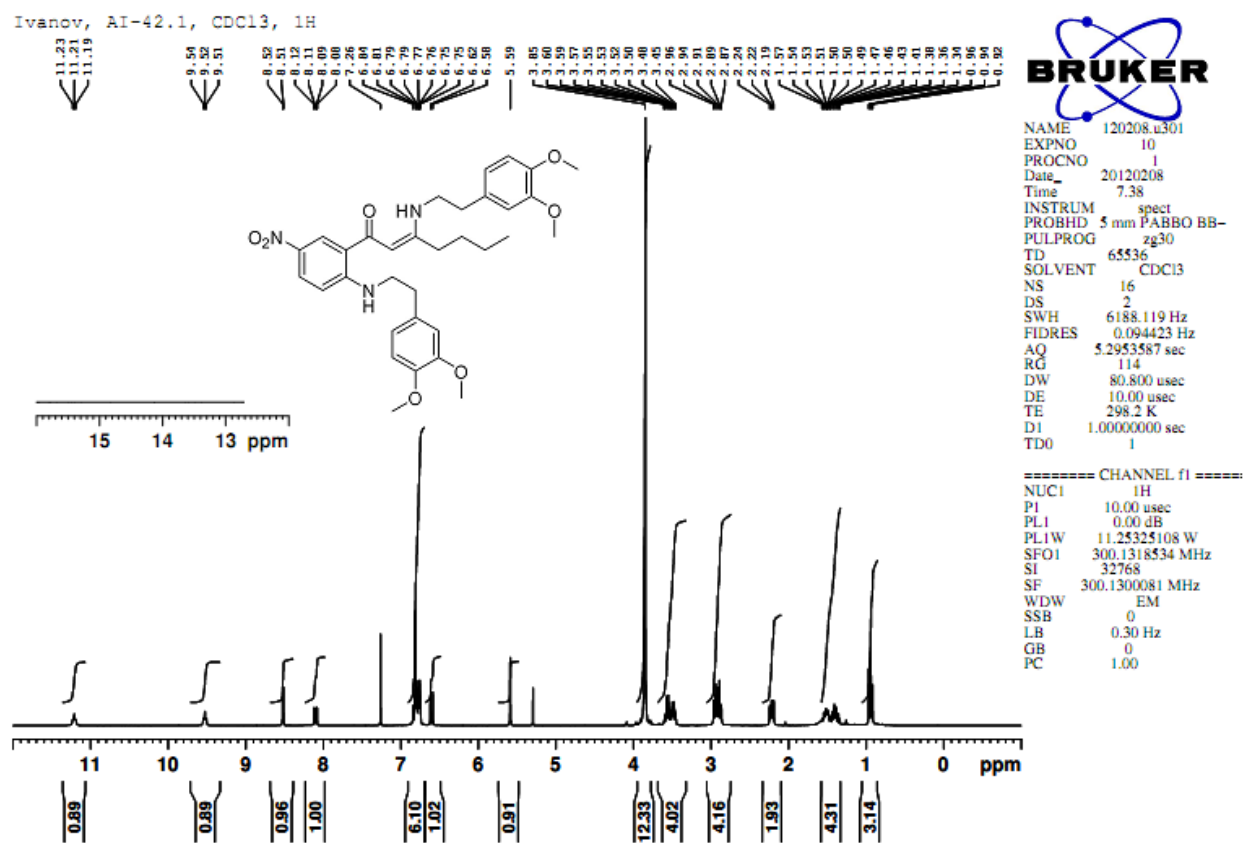

**(Z)-3-(3,4-Dimethoxyphenethylamino)-1-(2-(3,4-dimethoxyphenethylamino)-5-nitrophenyl)hept-2-en-1-one (9c).**Ivanov, AI-42.1, CDCl<sub>3</sub>, 13C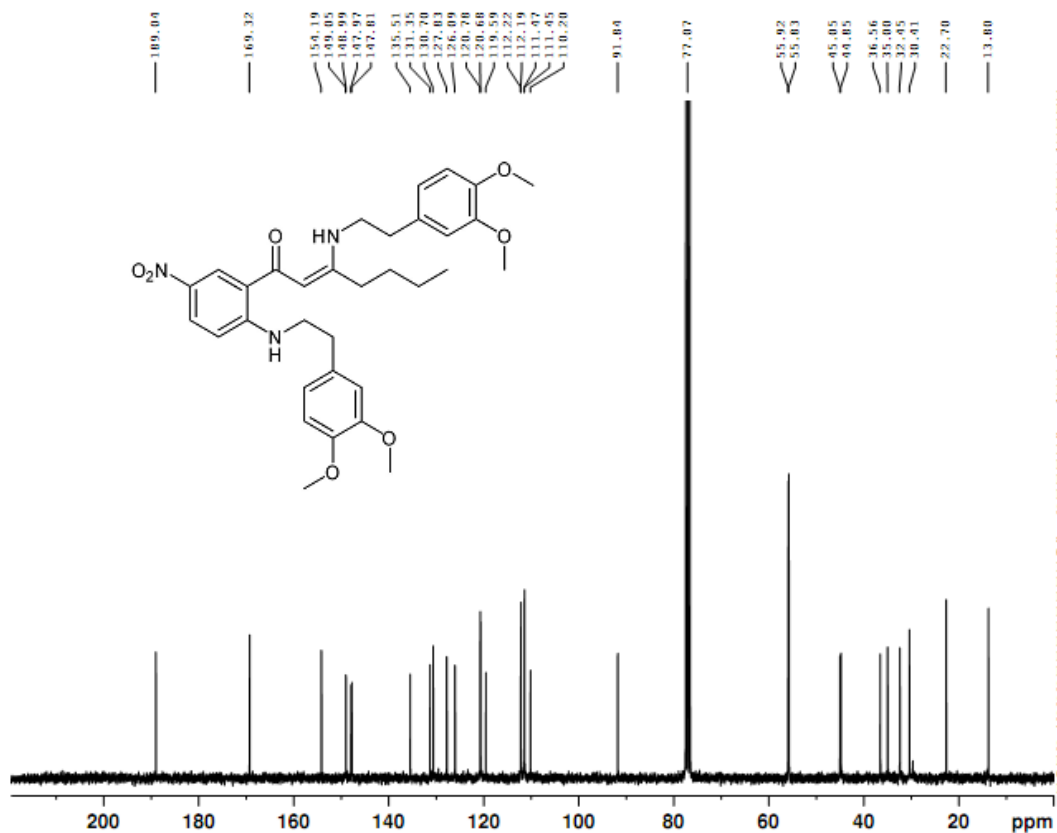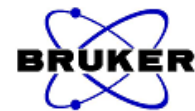

NAME 120210.u331  
 EXPNO 10  
 PROCNO 1  
 Date\_ 20120211  
 Time 1.58  
 INSTRUM spect  
 PROBHD 5 mm PABBO BB-  
 PULPROG zgpg30  
 TD 65536  
 SOLVENT CDCl3  
 NS 1024  
 DS 4  
 SWH 18028.846 Hz  
 FIDRES 0.275098 Hz  
 AQ 1.8175818 sec  
 RG 2050  
 DW 27.733 usec  
 DE 10.00 usec  
 TE 298.2 K  
 D1 2.00000000 sec  
 D11 0.03000000 sec  
 TD0 1

===== CHANNEL f1 =====  
 NUC1 13C  
 P1 10.00 usec  
 PL1 -0.50 dB  
 PL1W 33.25691986 W  
 SFO1 75.4752953 MHz

===== CHANNEL f2 =====  
 CPDPRG2 waltz16  
 NUC2 1H  
 PCPD2 72.00 usec  
 PL2 0.00 dB  
 PL12 17.00 dB  
 PL13 17.00 dB  
 PL2W 11.25325108 W  
 PL12W 0.22453187 W  
 PL13W 0.22453187 W  
 SFO2 300.1312005 MHz  
 SI 32768  
 SF 75.4677490 MHz  
 WDW EM  
 SSB 0  
 LB 1.00 Hz  
 GB 0  
 PC 1.40

**(Z)-3-(Cyclohexylamino)-1-(2-(cyclohexylamino)-5-nitrophenyl)hept-2-en-1-one (9d).**

Anton Ivanov, AI-43.1, 1H in CDCl3

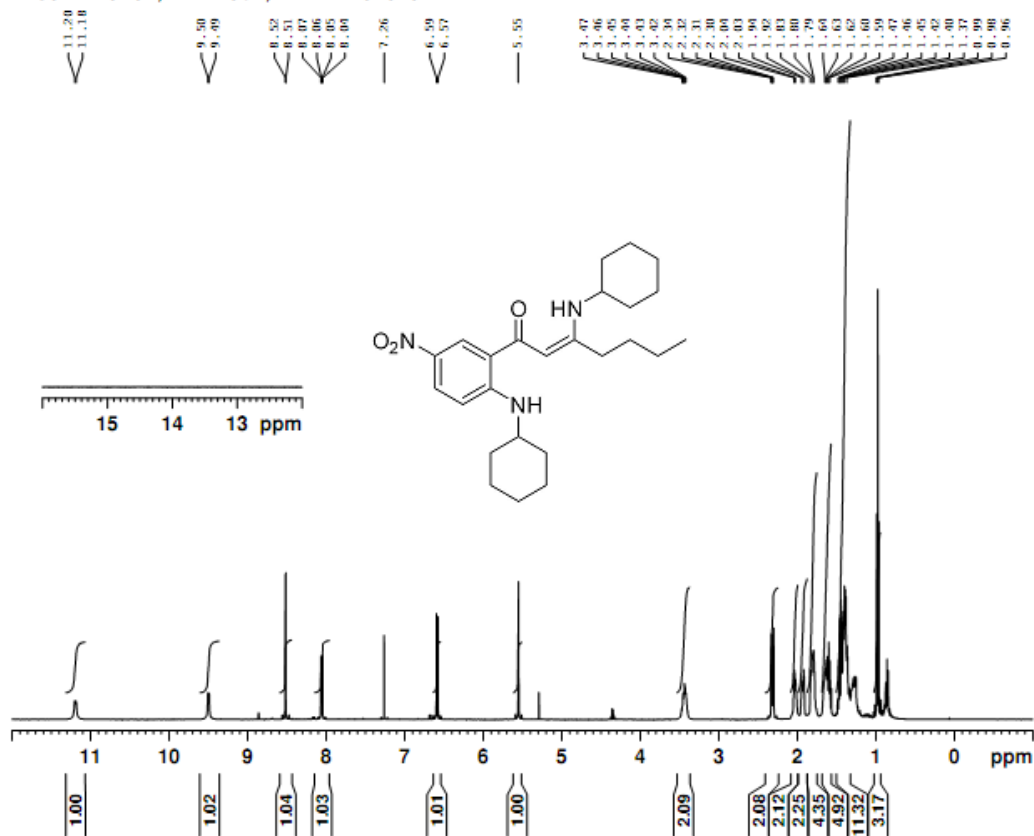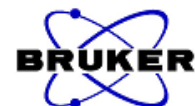

NAME 120306.502  
 EXPNO 10  
 PROCNO 1  
 Date\_ 20120306  
 Time 11.09  
 INSTRUM spect  
 PROBHD 5 mm PABBO BB-  
 PULPROG zg30  
 TD 65536  
 SOLVENT CDCl3  
 NS 16  
 DS 2  
 SWH 10330.578 Hz  
 FIDRES 0.157632 Hz  
 AQ 3.1720407 sec  
 RG 71.8  
 DW 48.400 usec  
 DE 6.50 usec  
 TE 300.0 K  
 D1 1.0000000 sec  
 TD0 1

===== CHANNEL f1 =====  
 NUC1 1H  
 P1 9.80 usec  
 PL1 -3.00 dB  
 SFO1 500.1330885 MHz  
 SI 32768  
 SF 500.1300126 MHz  
 WDW EM  
 SSB 0  
 LB 0.30 Hz  
 GB 0  
 PC 1.00



**(Z)-3-(Cyclohexylamino)-1-(2-(cyclohexylamino)-5-nitrophenyl)hept-2-en-1-one (9d).**Anton Ivanov, AI-43.1, <sup>13</sup>C in CDCl<sub>3</sub>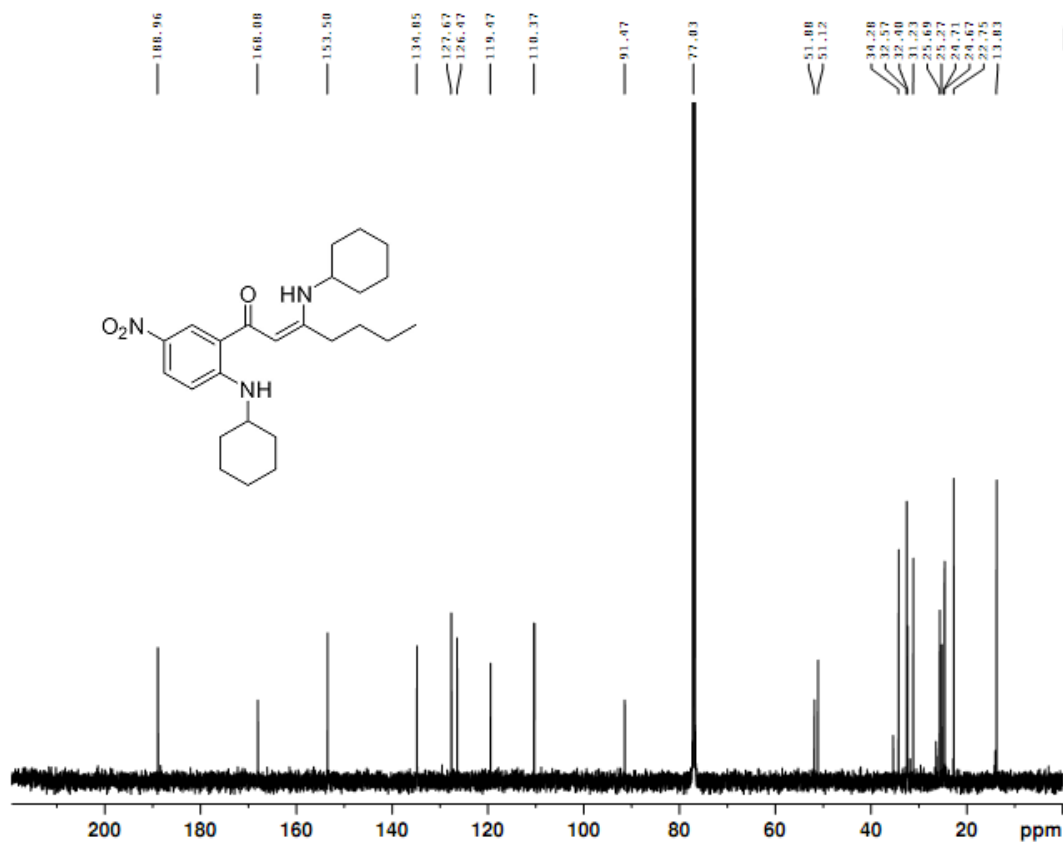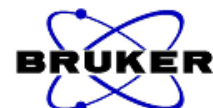

NAME 120306.502  
 EXPNO 13  
 PROCNO 1  
 Date\_ 20120306  
 Time 12.03  
 INSTRUM spect  
 PROBHD 5 mm PABBO BB-  
 PULPROG zgpg30  
 TD 65536  
 SOLVENT CDCl3  
 NS 256  
 DS 4  
 SWH 30030.029 Hz  
 FIDRES 0.458222 Hz  
 AQ 1.0912410 sec  
 RG 2896.3  
 DW 16.650 usec  
 DE 6.50 usec  
 TE 300.0 K  
 D1 2.00000000 sec  
 D11 0.03000000 sec  
 TD0 1

===== CHANNEL f1 =====  
 NUC1 13C  
 P1 9.00 usec  
 PL1 4.50 dB  
 SFO1 125.7703643 MHz

===== CHANNEL f2 =====  
 CPDPRG2 waltz16  
 NUC2 1H  
 PCPD2 70.00 usec  
 PL2 -3.00 dB  
 PL12 14.08 dB  
 PL13 120.00 dB  
 SFO2 500.1320005 MHz  
 SI 32768  
 SF 125.7577890 MHz  
 WDW EM  
 SSB 0  
 LB 1.00 Hz  
 GB 0  
 PC 1.40

**(Z)-1-(2-Chloro-5-nitrophenyl)-3-(3,4-dimethoxyphenethylamino)hept-2-en-1-one (10a).**Ivanov, AI-42.2, CDCl<sub>3</sub>, 1H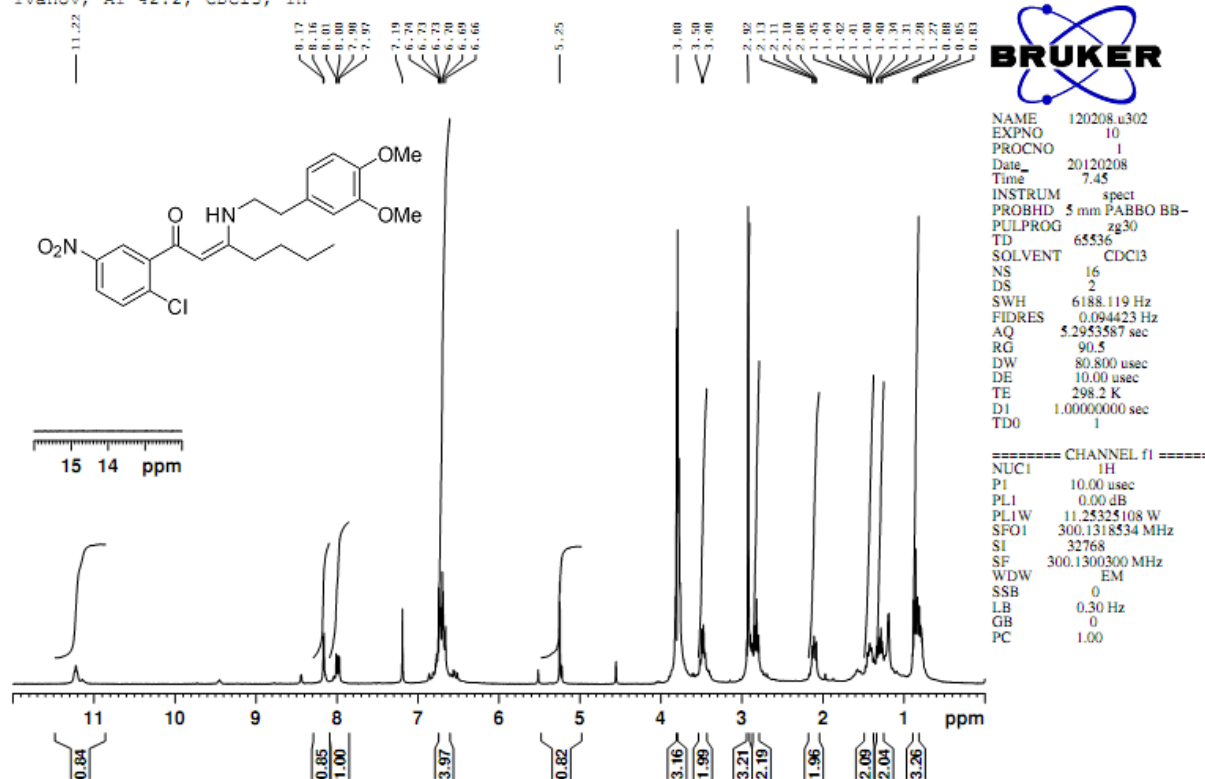

**(Z)-1-(2-Chloro-5-nitrophenyl)-3-(3,4-dimethoxyphenethylamino)hept-2-en-1-one (10a).**Ivanov, AI-42.2, CDCl<sub>3</sub>, 13C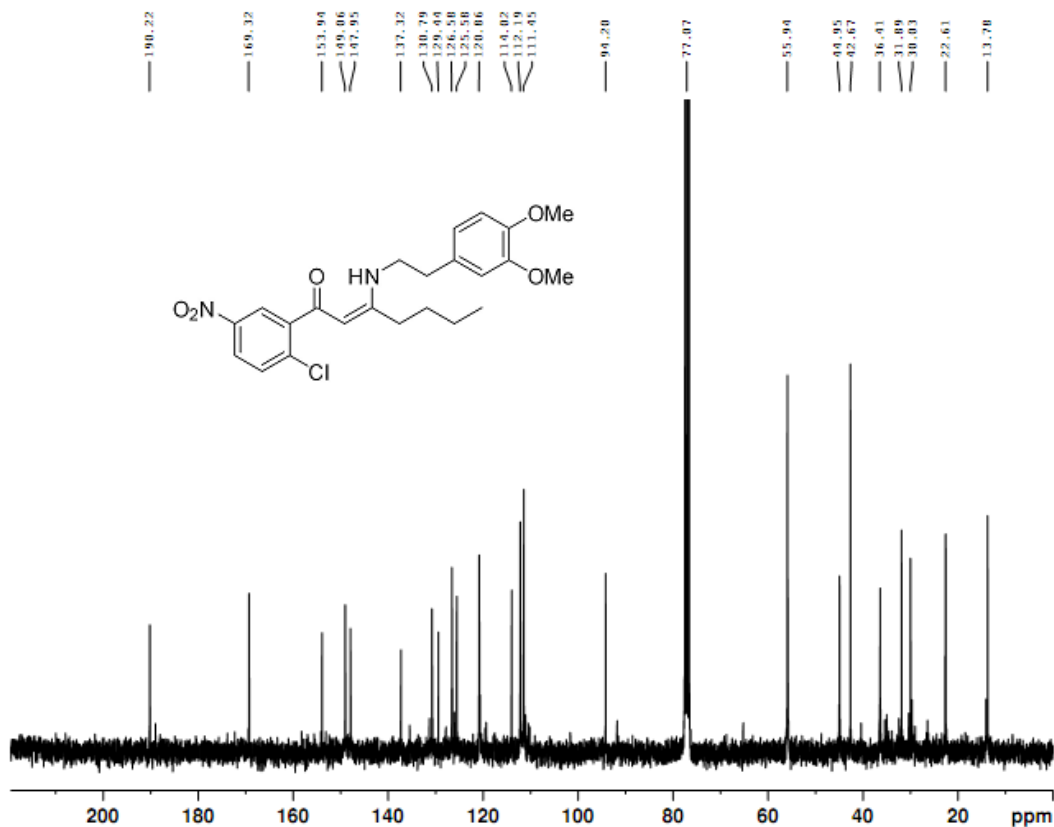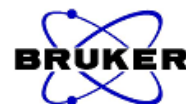

NAME 120210.a329  
 EXPNO 10  
 PROCNO 1  
 Date\_ 20120210  
 Time 18.18  
 INSTRUM spect  
 PROBHD 5 mm PABBO BB-  
 PULPROG zgpg30  
 TD 65536  
 SOLVENT CDCl3  
 NS 1024  
 DS 4  
 SWH 18028.846 Hz  
 FIDRES 0.275098 Hz  
 AQ 1.8175818 sec  
 RG 2050  
 DW 27.733 usec  
 DE 10.00 usec  
 TE 298.2 K  
 D1 2.00000000 sec  
 D11 0.03000000 sec  
 TD0 1

----- CHANNEL f1 -----  
 NUC1 13C  
 P1 10.00 usec  
 PL1 -0.50 dB  
 PL1W 33.25691986 W  
 SFO1 75.4752953 MHz

----- CHANNEL f2 -----  
 CPDPRG2 waltz16  
 NUC2 1H  
 PCPD2 72.00 usec  
 PL2 0.00 dB  
 PL12 17.00 dB  
 PL13 17.00 dB  
 PL2W 11.25325108 W  
 PL12W 0.22453187 W  
 PL13W 0.22453187 W  
 SFO2 300.1312005 MHz  
 SI 32768  
 SF 75.4677490 MHz  
 WDW EM  
 SSB 0  
 LB 1.00 Hz  
 GB 0  
 PC 1.40

**(Z)-1-(2-Chloro-5-nitrophenyl)-3-(cyclohexylamino) hept-2-en-1-one (10b).**Anton Ivanov, AI-43.2, 1H in CDCl<sub>3</sub>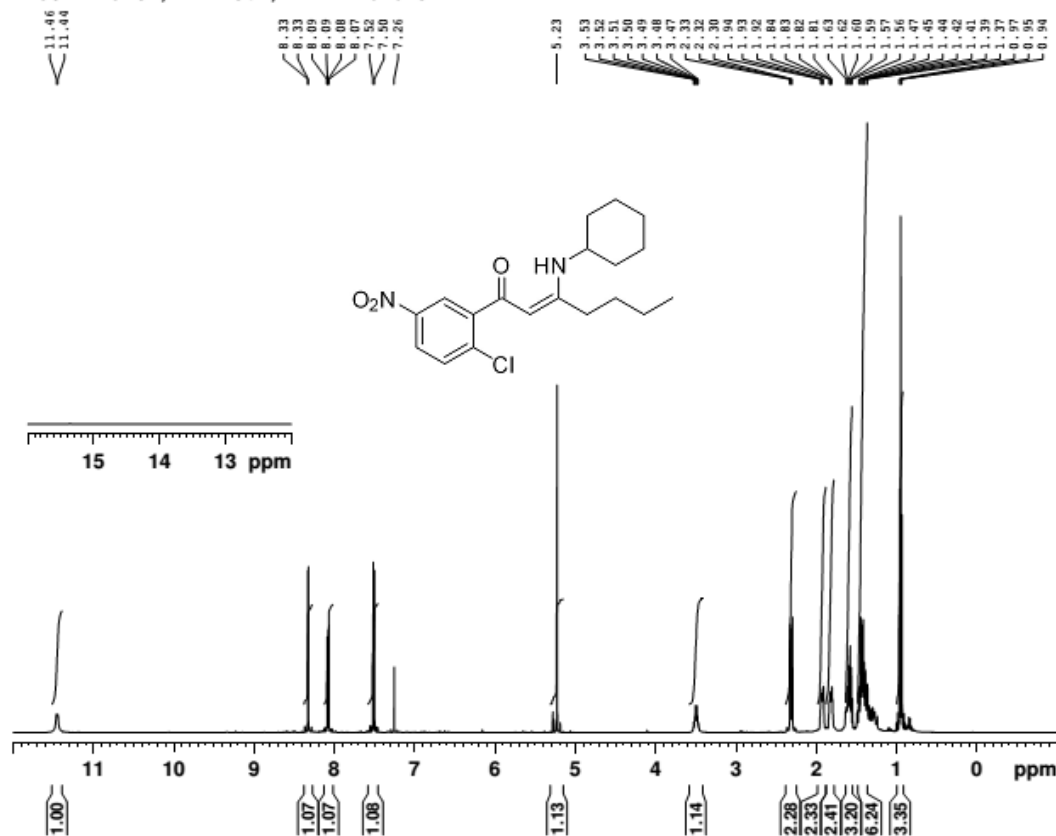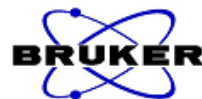

NAME 120306.503  
 EXPNO 10  
 PROCNO 1  
 Date\_ 20120306  
 Time 12.09  
 INSTRUM spect  
 PROBHD 5 mm PABBO BB-  
 PULPROG zg30  
 TD 65536  
 SOLVENT CDCl3  
 NS 16  
 DS 2  
 SWH 10330.578 Hz  
 FIDRES 0.157632 Hz  
 AQ 3.1720407 sec  
 RG 71.8  
 DW 48.400 usec  
 DE 6.50 usec  
 TE 300.0 K  
 D1 1.0000000 sec  
 TD0 1

===== CHANNEL f1 =====  
 NUC1 1H  
 P1 9.80 usec  
 PL1 -3.00 dB  
 SFO1 500.1330885 MHz  
 SI 32768  
 SF 500.1300135 MHz  
 WDW EM  
 SSB 0  
 LB 0.30 Hz  
 GB 0  
 PC 1.00

**(Z)-1-(2-Chloro-5-nitrophenyl)-3-(cyclohexylamino) hept-2-en-1-one (10b).**Anton Ivanov, AI-43.2, <sup>13</sup>C in CDCl<sub>3</sub>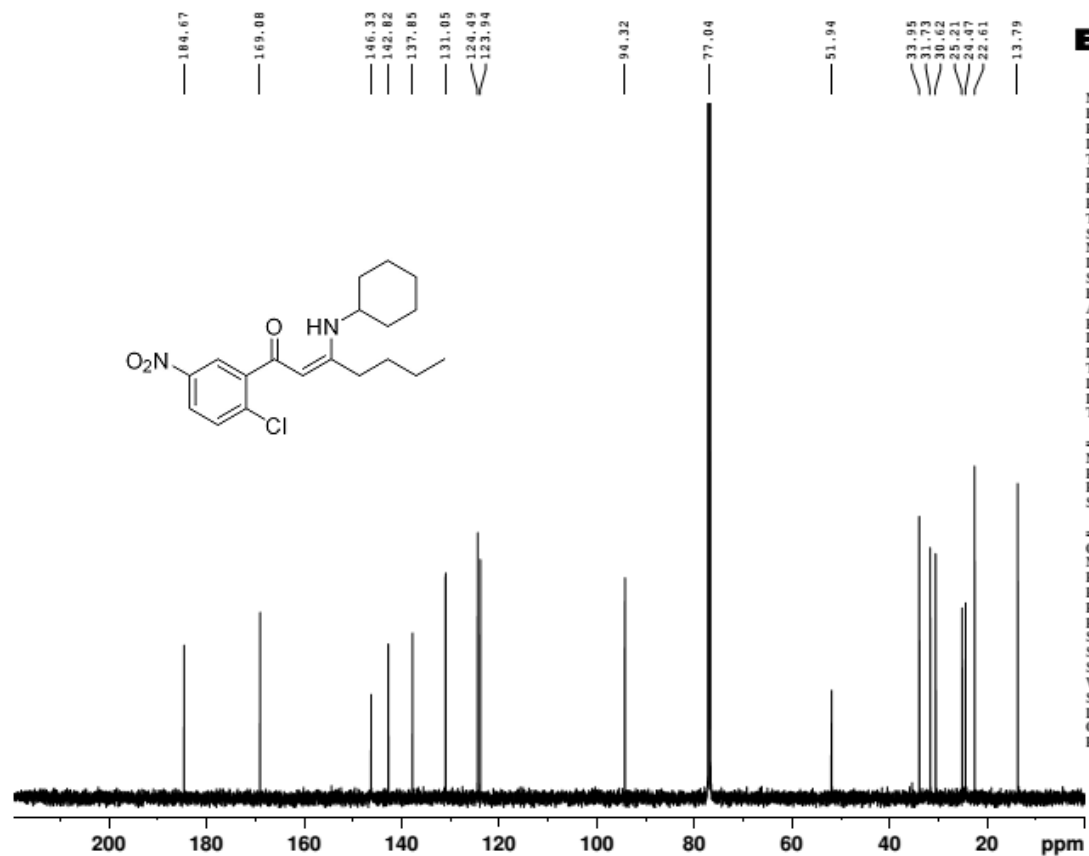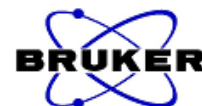

NAME 120306.503  
 EXPNO 13  
 PROCNO 1  
 Date\_ 20120306  
 Time 13.04  
 INSTRUM spect  
 PROBHD 5 mm PABBO BB-  
 PULPROG zgpg30  
 TD 65536  
 SOLVENT CDCl3  
 NS 256  
 DS 4  
 SWH 30030.029 Hz  
 FIDRES 0.458222 Hz  
 AQ 1.0912410 sec  
 RG 3251  
 DW 16.650 usec  
 DE 6.50 usec  
 TE 300.0 K  
 D1 2.00000000 sec  
 D11 0.03000000 sec  
 TD0 1

===== CHANNEL f1 =====  
 NUC1 <sup>13</sup>C  
 P1 9.00 usec  
 PL1 4.50 dB  
 SFO1 125.7703643 MHz

===== CHANNEL f2 =====  
 CPDPRG2 waltz16  
 NUC2 <sup>1</sup>H  
 PCPD2 70.00 usec  
 PL2 -3.00 dB  
 PL12 14.08 dB  
 PL13 120.00 dB  
 SFO2 500.1320005 MHz  
 SI 32768  
 SF 125.7577890 MHz  
 WDW EM  
 SSB 0  
 LB 1.00 Hz  
 GB 0  
 PC 1.40

(Z)-1-(2-Chloro-5-nitrophenyl)-3-(methyl(phenyl)amino)-3-p-tolylprop-2-en-1-one (11).

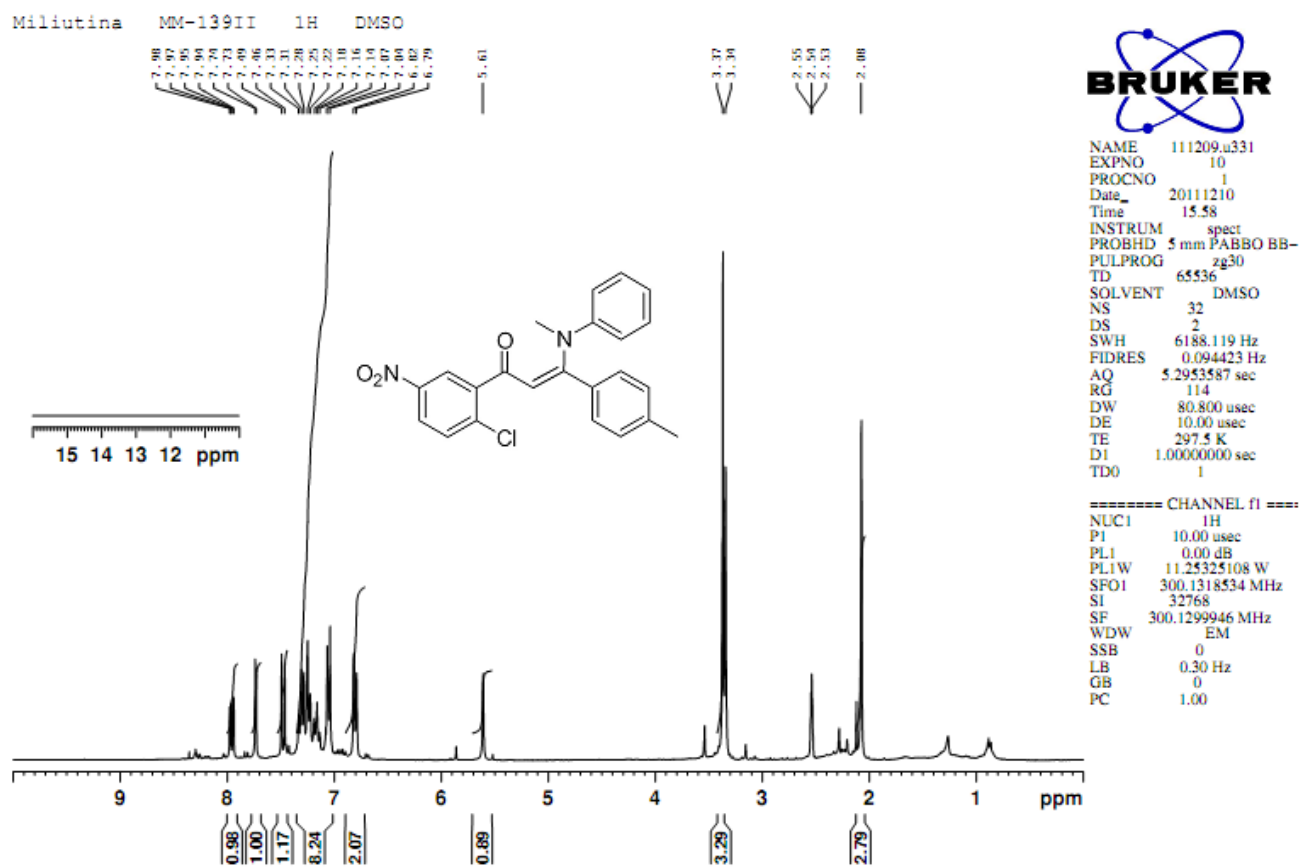

**(Z)-1-(2-Chloro-5-nitrophenyl)-3-(methyl(phenyl)amino)-3-p-tolylprop-2-en-1-one (11).**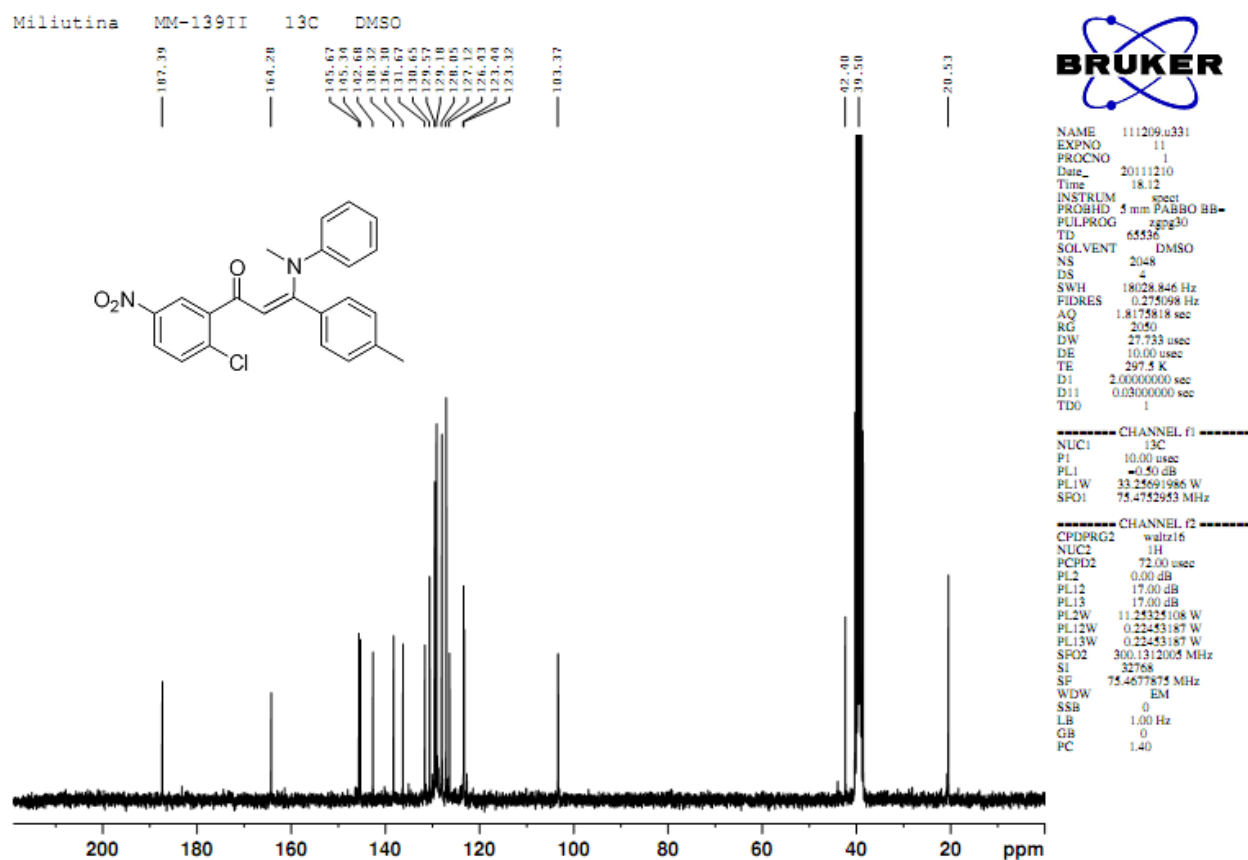

## 1,1'-(Butane-1,4-diyl)bis(6-nitro-2-p-tolylquinolin-4(1H)-one) (12a).

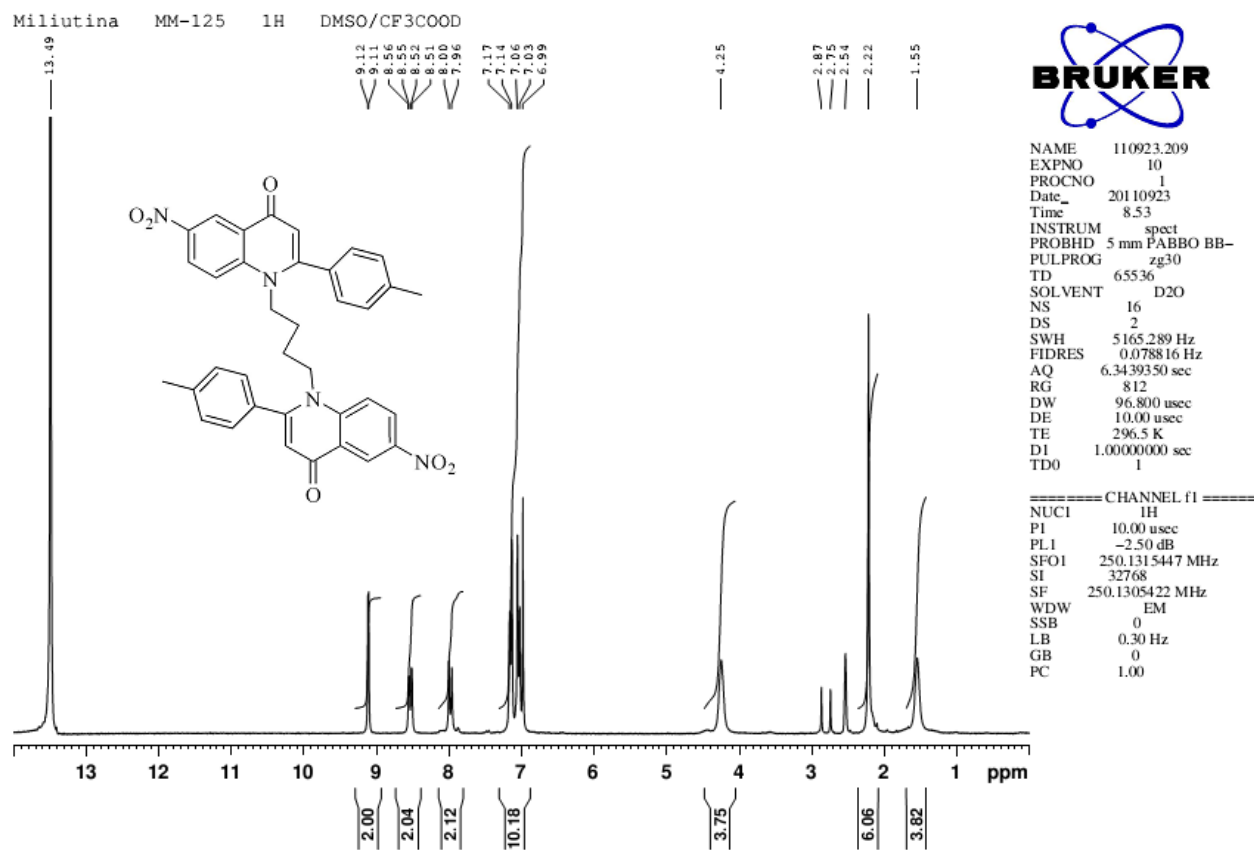



## 1,1'-(Butane-1,4-diyl)bis(6-nitro-2-p-tolylquinolin-4(1H)-one) (12a).

Miliutina MM-125 13C DMSO-*d*<sub>6</sub>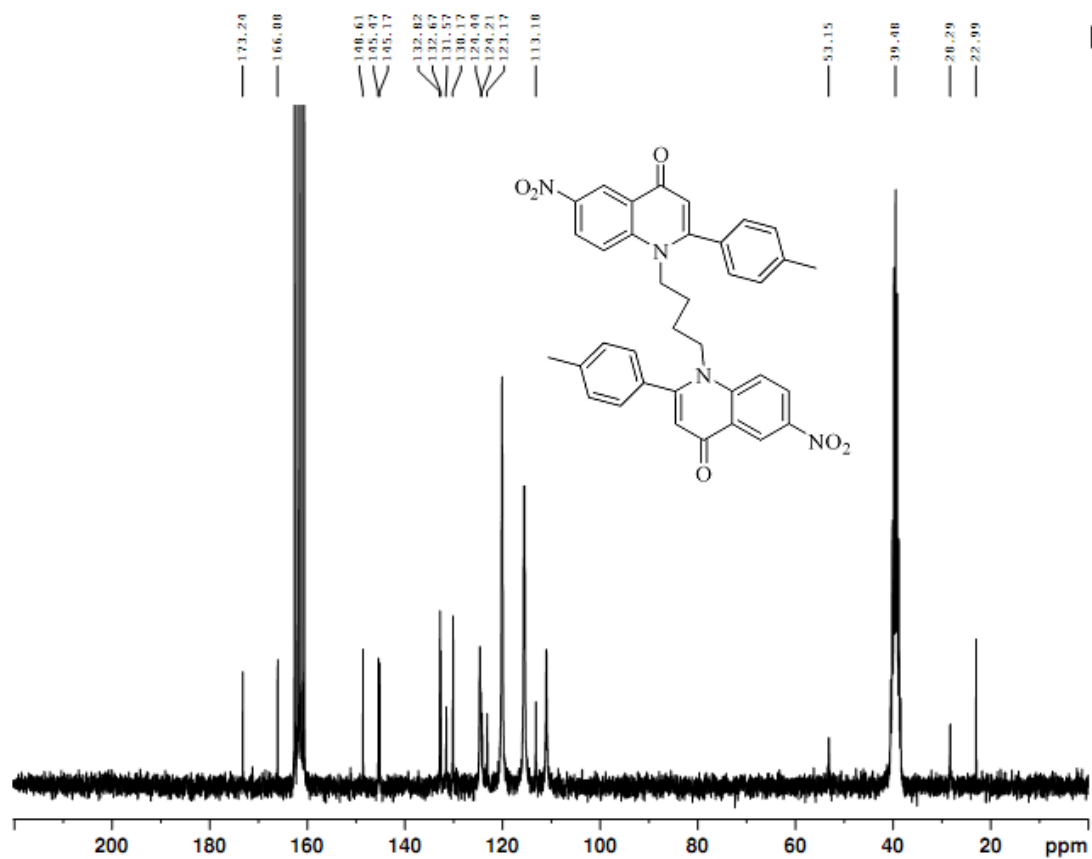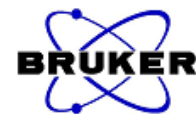

NAME 110923.209  
EXPNO 11  
PROCNO 1  
Date\_ 20110923  
Time 15.15  
INSTRUM spect  
PROBHD 5 mm PABBO BB-  
PULPROG zgpg30  
TD 65536  
SOLVENT D2O  
NS 1024  
DS 4  
SWH 15000.000 Hz  
FIDRES 0.228882 Hz  
AQ 2.1845834 sec  
RG 2050  
DW 33.333 usec  
DE 10.00 usec  
TE 298.9 K  
D1 2.0000000 sec  
d11 0.0300000 sec  
DELTA 1.89999998 sec  
TD0 1

===== CHANNEL f1 =====  
NUC1 13C  
P1 10.00 usec  
PL1 -1.00 dB  
SFO1 62.9015280 MHz

===== CHANNEL f2 =====  
CPDPRG2 waltz16  
NUC2 1H  
PCPD2 70.00 usec  
PL12 15.00 dB  
PL13 15.00 dB  
PL2 -2.50 dB  
SFO2 250.1310005 MHz  
SI 32768  
SF 62.8951757 MHz  
WDW EM  
SSB 0  
LB 1.00 Hz  
GB 0  
PC 1.40

## 1,1'-(Hexane-1,6-diyl)bis(6-nitro-2-p-tolylquinolin-4(1H)-one) (12b).

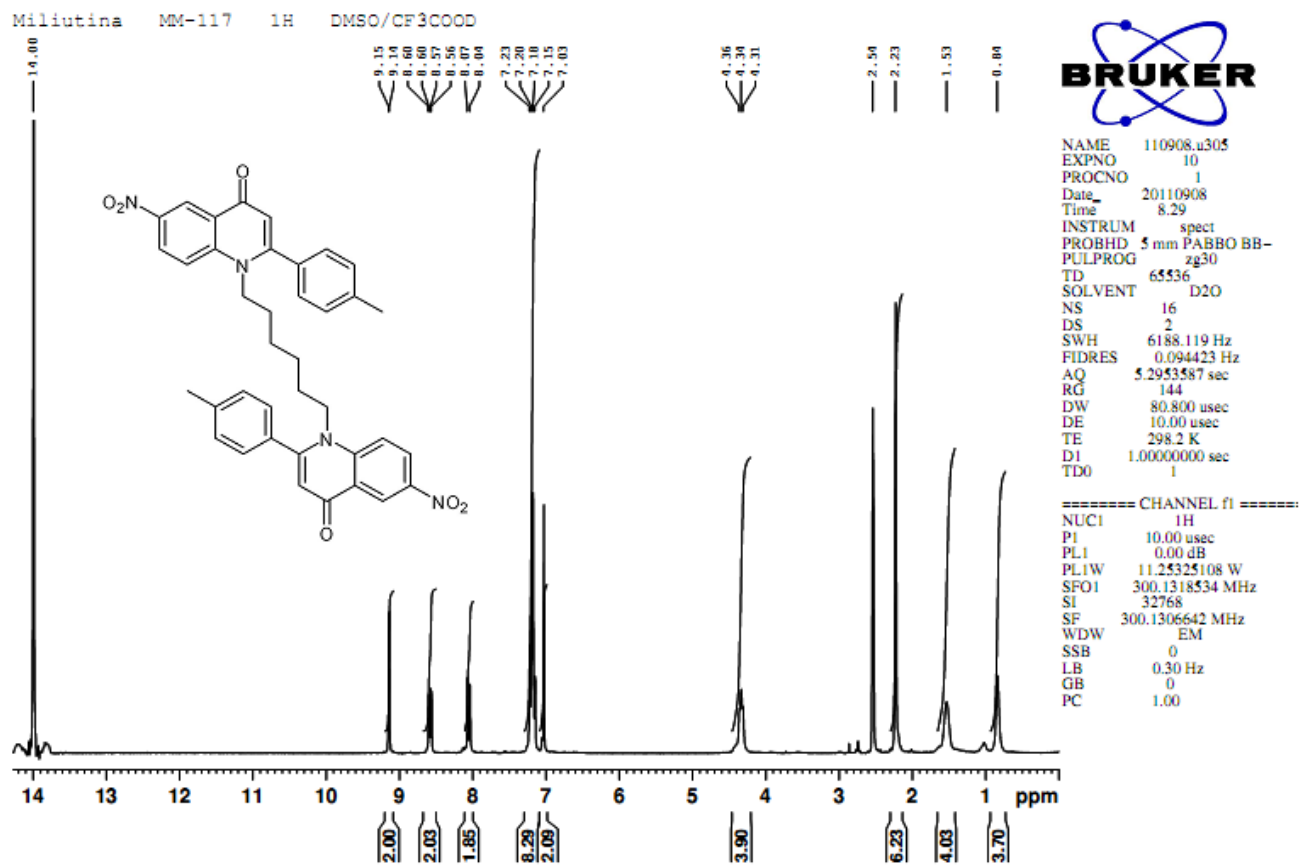

## 1,1'-(Hexane-1,6-diyl)bis(6-nitro-2-p-tolylquinolin-4(1H)-one) (12b).

Miliutina MM-117 13C DMSO-CP3COOD

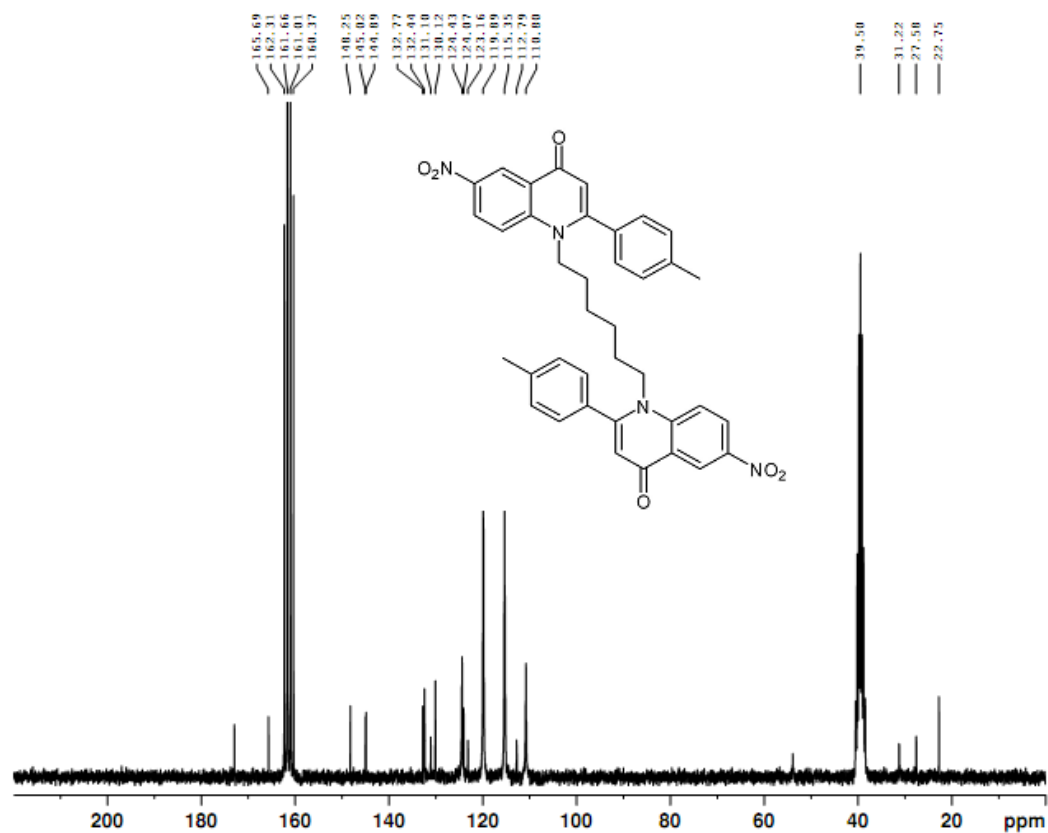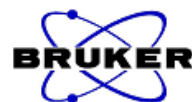

NAME 110914.209  
EXPNO 10  
PROCNO 1  
Date\_ 20110914  
Time 16.57  
INSTRUM spect  
PROBHD 5 mm PABBO BB-  
PULPROG zgpg30  
TD 65536  
SOLVENT D2O  
NS 1024  
DS 4  
SWH 15000.000 Hz  
FIDRES 0.228882 Hz  
AQ 2.1845834 sec  
RG 2050  
DW 33.333 usec  
DE 10.00 usec  
TE 298.1 K  
D1 2.0000000 sec  
d11 0.0300000 sec  
DELTA 1.89999998 sec  
TD0 1

===== CHANNEL f1 =====  
NUC1 13C  
P1 10.00 usec  
PL1 -1.00 dB  
SFO1 62.9015280 MHz

===== CHANNEL f2 =====  
CPDPRG2 waltz16  
NUC2 1H  
PCPD2 70.00 usec  
PL12 15.00 dB  
PL13 15.00 dB  
PL2 -2.50 dB  
SFO2 250.1310005 MHz  
S1 32768  
SF 62.8951970 MHz  
WDW EM  
SSB 0  
LB 1.00 Hz  
GB 0  
PC 1.40

6-Nitro-1'-propyl-2,2'-di*p*-tolyl-4*H*-1,6'-biquinoline-4,4'(1'*H*)-dione (13a).Miliutina MM-137 1H DMSO-*d*<sub>6</sub>/CF<sub>3</sub>COOD

14.27  
 10.79  
 9.96  
 9.65  
 9.44  
 8.88  
 8.75  
 8.67  
 8.57  
 8.44  
 5.90  
 3.73  
 3.51  
 3.15  
 2.09  
 2.08

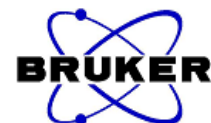

NAME 111209.a330  
 EXPNO 10  
 PROCNO 1  
 Date\_ 20111210  
 Time 13.45  
 INSTRUM spect  
 PROBHD 5 mm PABBO BB-  
 PULPROG zg30  
 TD 65536  
 SOLVENT D2O  
 NS 32  
 DS 2  
 SWH 9014.423 Hz  
 FIDRES 0.137549 Hz  
 AQ 3.6351135 sec  
 RG 114  
 DW 55.467 usec  
 DE 10.00 usec  
 TE 297.1 K  
 D1 1.0000000 sec  
 TD0 1

===== CHANNEL f1 =====  
 NUC1 1H  
 P1 10.00 usec  
 PL1 0.00 dB  
 PL1W 11.25325108 W  
 SFO1 300.1318534 MHz  
 SI 32768  
 SF 300.1302026 MHz  
 WDW EM  
 SSB 0  
 LB 0.30 Hz  
 GB 0  
 PC 1.00

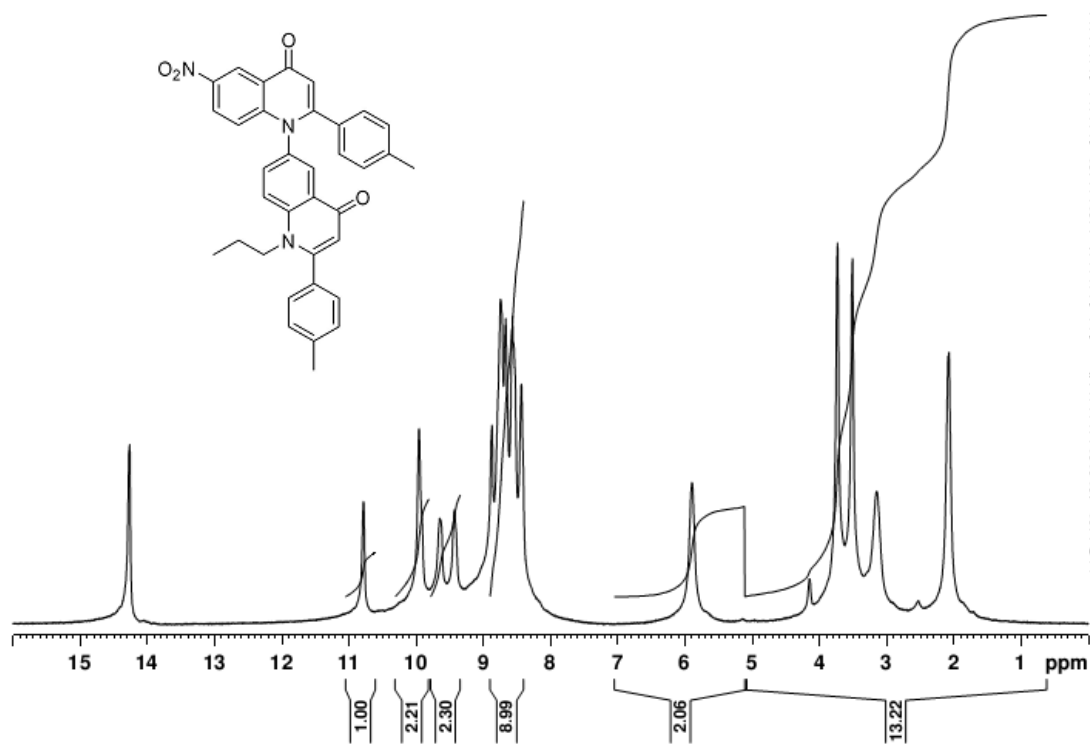

## 6-Nitro-1'-propyl-2,2'-di-p-tolyl-4H-1,6'-biquinoline-4,4'(1'H)-dione (13a).

Miliutina MM-137 13C DMSO/CF3COOD

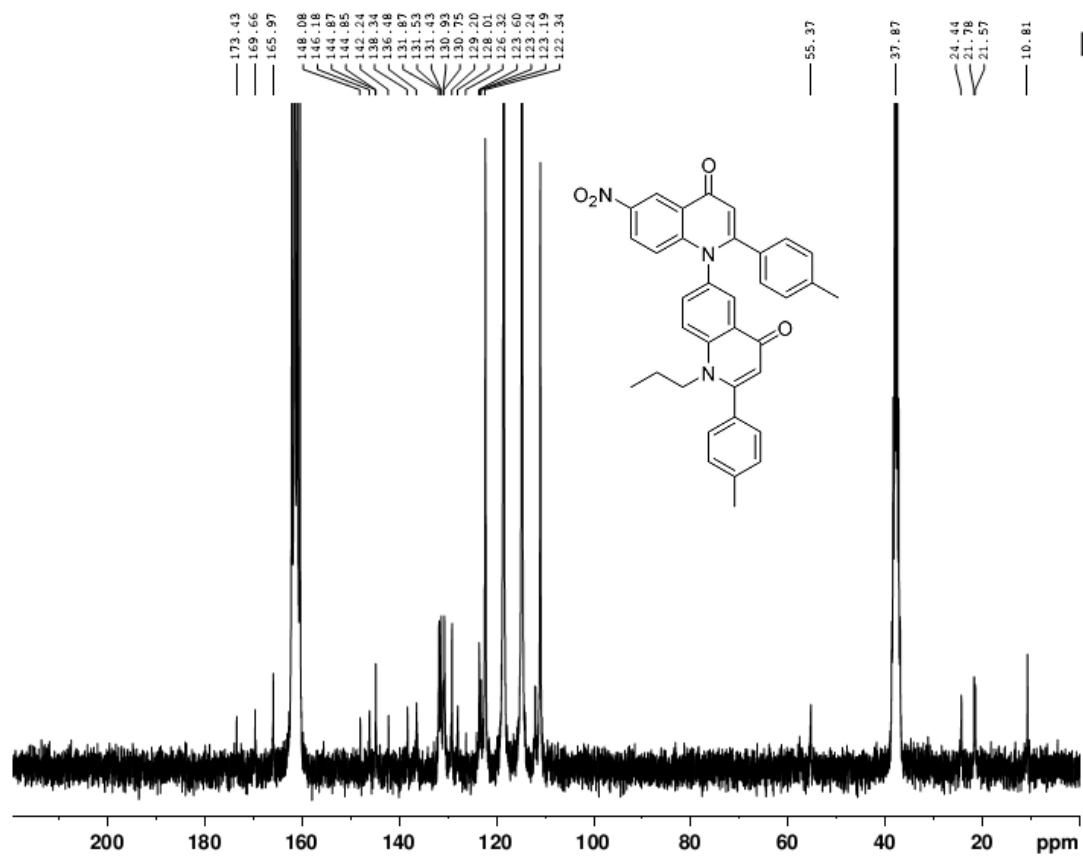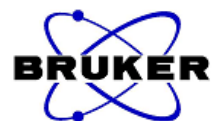

NAME 111209.u330  
 EXPNO 1  
 PROCNO 1  
 Date\_ 20111210  
 Time 15.17  
 INSTRUM spect  
 PROBHD 5 mm PABBO BB-  
 PULPROG zgpg30  
 TD 65536  
 SOLVENT D2O  
 NS 1400  
 DS 4  
 SWH 18028.846 Hz  
 FIDRES 0.275098 Hz  
 AQ 1.8175818 sec  
 RG 2080  
 DW 27.733 usec  
 DE 10.00 usec  
 TE 298.6 K  
 D1 2.0000000 sec  
 D11 0.0300000 sec  
 TD0 1

===== CHANNEL f1 =====  
 NUC1 13C  
 P1 10.00 usec  
 PL1 -0.50 dB  
 PL1W 33.25691986 W  
 SFO1 75.4752953 MHz

===== CHANNEL f2 =====  
 CPDPRG2 waltz16  
 NUC2 1H  
 PCPD2 72.00 usec  
 PL2 0.00 dB  
 PL12 17.00 dB  
 PL13 17.00 dB  
 PL2W 11.25325108 W  
 PL12W 0.22453187 W  
 PL13W 0.22453187 W  
 SFO2 300.1312005 MHz  
 SI 32768  
 SF 75.4677888 MHz  
 WDW EM  
 SSB 0  
 LB 1.00 Hz  
 GB 0  
 PC 1.40

1'-Isopropyl-6-nitro-2,2'-di*p*-tolyl-4*H*-1,6'-biquinoline-4,4'(1'*H*)-dione (13b).

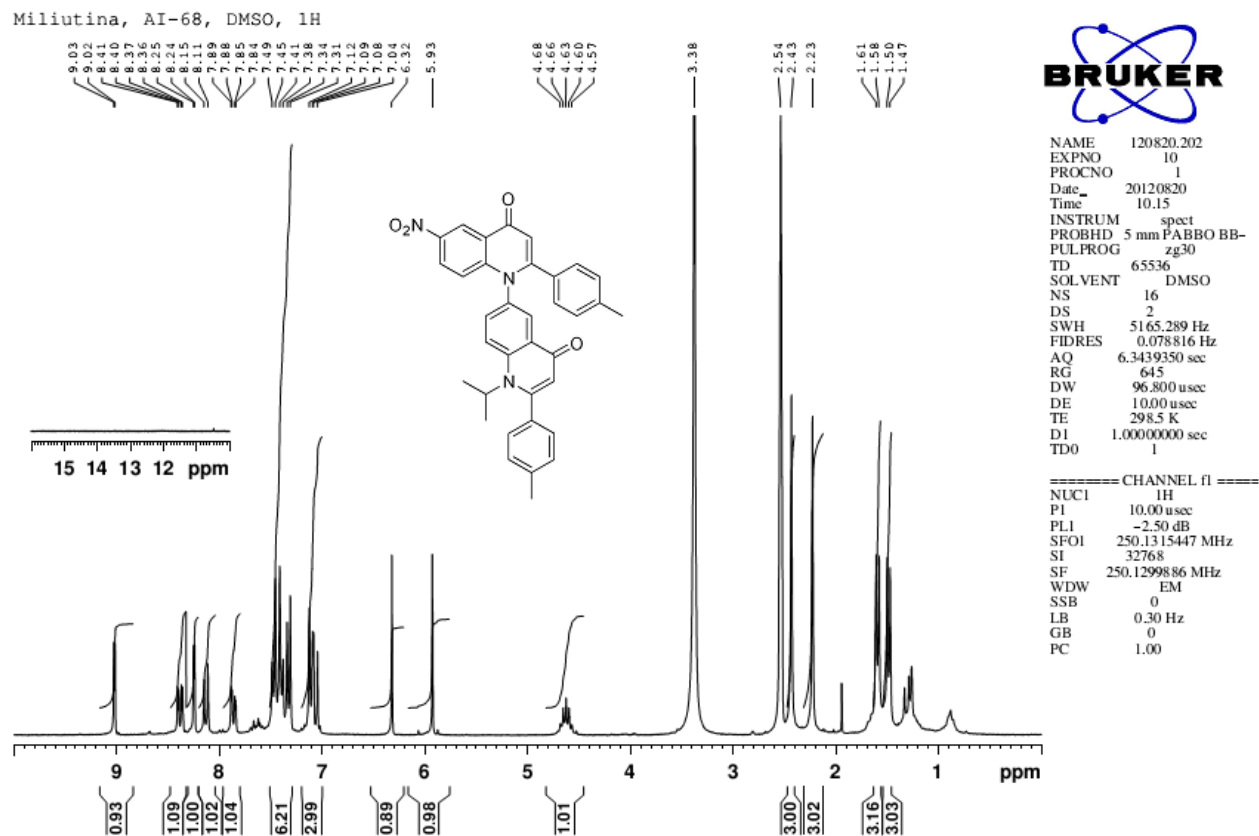

## 1'-Isopropyl-6-nitro-2,2'-dip-tolyl-4H-1,6'-biquinoline-4,4'(1'H)-dione (13b).

Miliutina, AI-68, DMSO, 13C

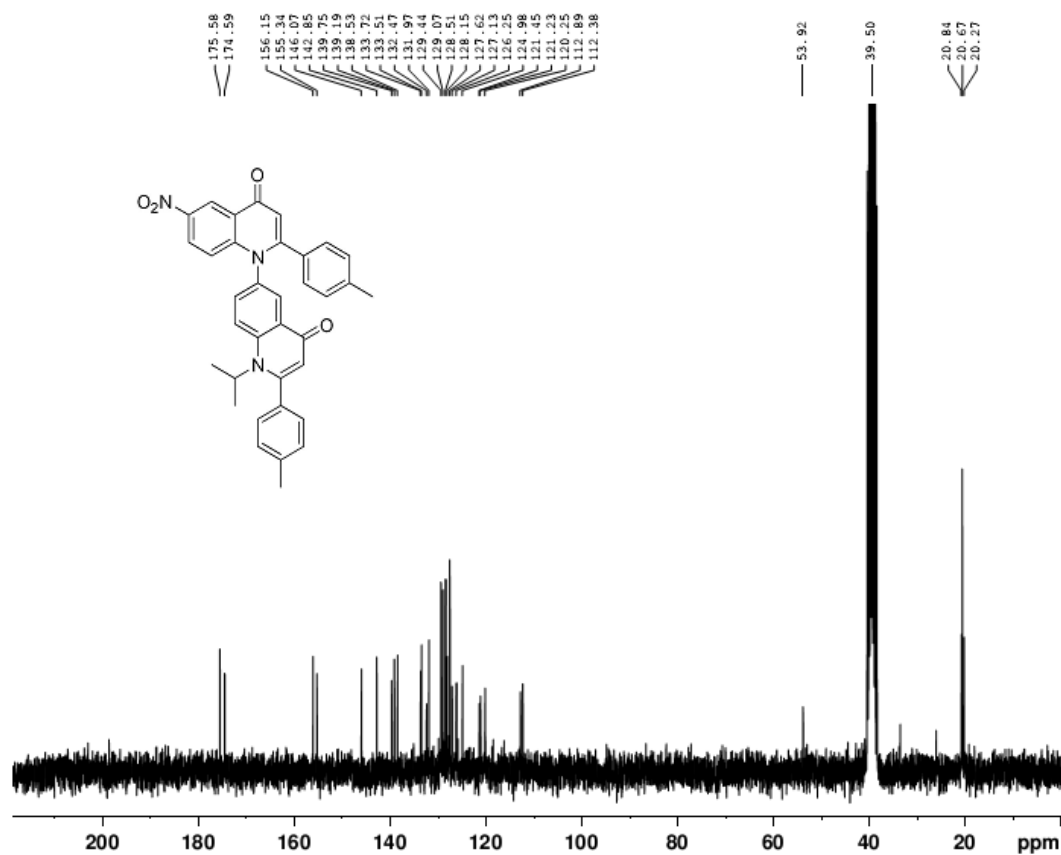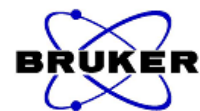

NAME 120820.202  
 EXPNO 11  
 PROCNO 1  
 Date\_ 20120820  
 Time 11.30  
 INSTRUM spect  
 PROBHD 5 mm PABBO BB-  
 PULPROG zgpg30  
 TD 65536  
 SOLVENT DMSO  
 NS 1024  
 DS 4  
 SWH 15000.000 Hz  
 FIDRES 0.228882 Hz  
 AQ 2.1845834 sec  
 RG 2050  
 DW 33.333 usec  
 DE 10.00 usec  
 TE 299.6 K  
 D1 2.0000000 sec  
 d11 0.0300000 sec  
 DELTA 1.89999998 sec  
 TD0 1

===== CHANNEL f1 =====  
 NUC1 13C  
 P1 10.00 usec  
 PL1 -1.00 dB  
 SFO1 62.9015280 MHz

===== CHANNEL f2 =====  
 CPDPRG2 waltz16  
 NUC2 1H  
 RCPD2 70.00 usec  
 PL12 15.00 dB  
 PL13 15.00 dB  
 PL2 -2.50 dB  
 SFO2 250.1310005 MHz  
 SI 32768  
 SF 62.8952695 MHz  
 WDW EM  
 SSB 0  
 LB 1.00 Hz  
 GB 0  
 PC 1.40

3,6-Dibromo-1-(4-methoxybenzyl)-2-*p*-tolylquinolin-4(1*H*)-one (14).

Miliutina MM-177-1 1H DMSO

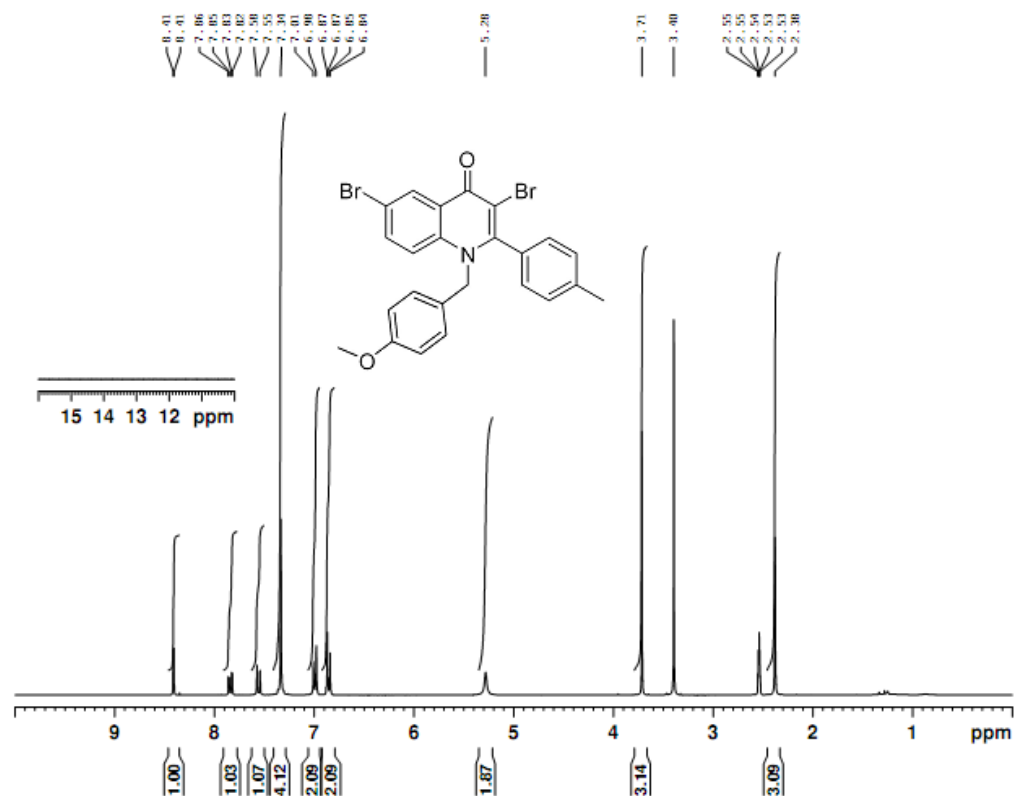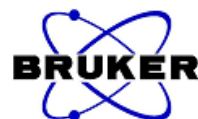

NAME 120531.u304  
 EXPNO 10  
 PROCNO 1  
 Date\_ 20120531  
 Time 8.18  
 INSTRUM spect  
 PROBHD 5 mm PABBO BB-  
 PULPROG zg30  
 TD 65536  
 SOLVENT DMSO  
 NS 16  
 DS 2  
 SWH 6188.119 Hz  
 FIDRES 0.094423 Hz  
 AQ 5.2953587 sec  
 RG 50.8  
 DW 80.800 usec  
 DE 10.00 usec  
 TE 297.8 K  
 D1 1.0000000 sec  
 TD0 1

===== CHANNEL f1 =====  
 NUC1 1H  
 P1 10.00 usec  
 PL1 0.00 dB  
 PL1W 11.25325108 W  
 SFO1 300.1318534 MHz  
 SI 32768  
 SF 300.1299953 MHz  
 WDW EM  
 SSB 0  
 LB 0.30 Hz  
 GB 0  
 PC 1.00



3,6-Dibromo-1-(4-methoxybenzyl)-2-*p*-tolylquinolin-4(1*H*)-one (14).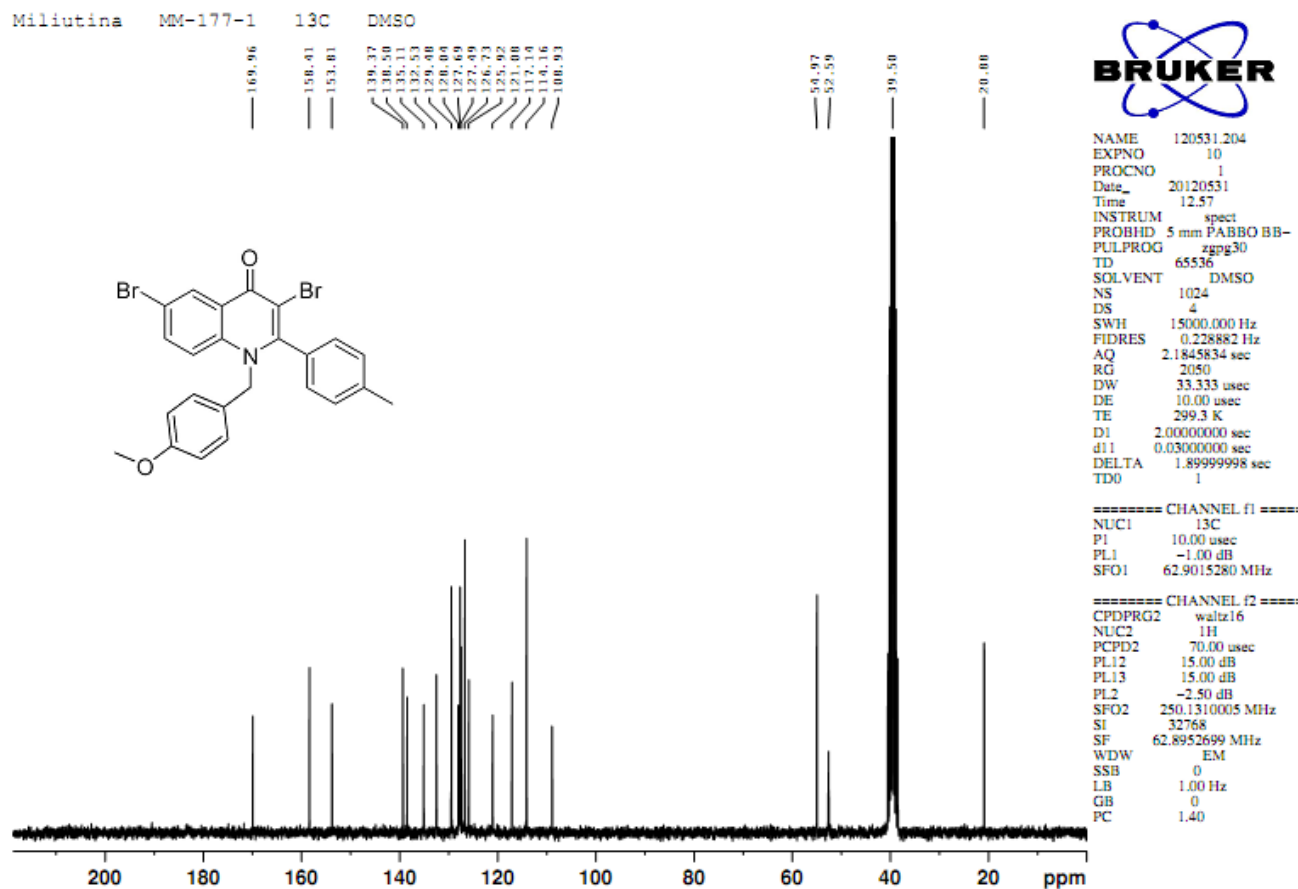

3,6-Bis(4-ethylphenyl)-1-(4-methoxybenzyl)-2-*p*-tolylquinolin-4(1*H*)-one (15).

Miliutina MM-183-3 1H DMSO

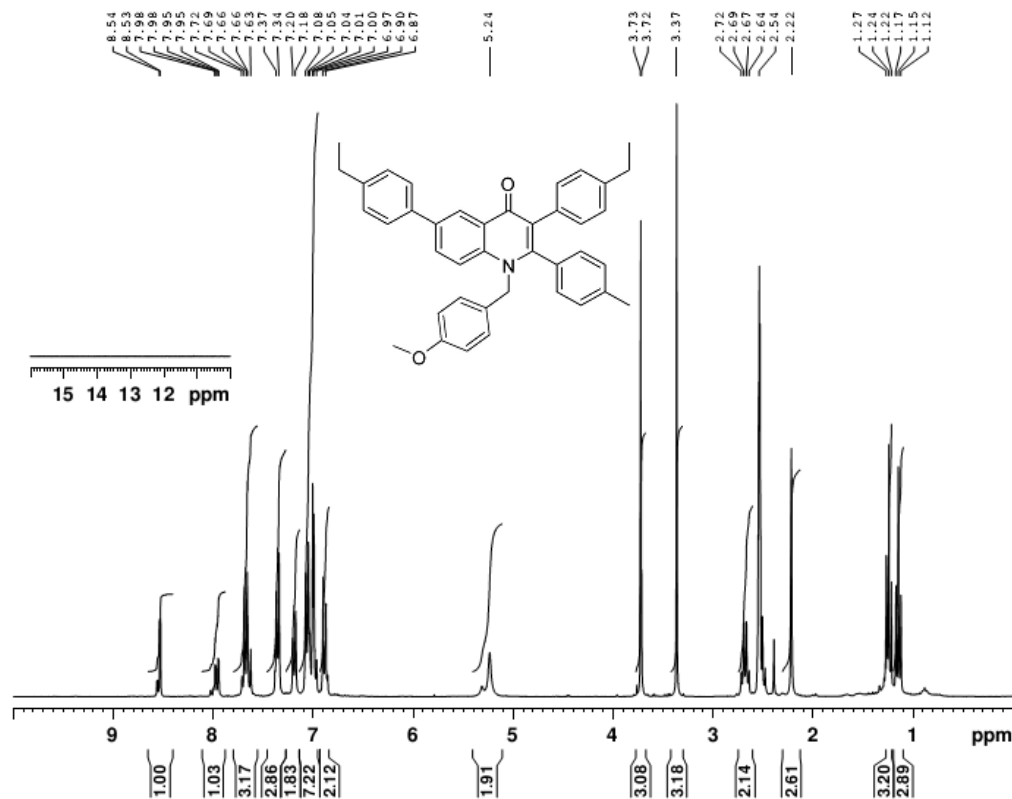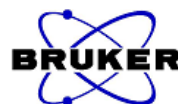

NAME 120716.a314  
 EXPNO 10  
 PROCNO 1  
 Date\_ 20120716  
 Time 11.39  
 INSTRUM spect  
 PROBHD 5 mm PABBO BB-  
 PULPROG zg30  
 TD 65536  
 SOLVENT DMSO  
 NS 32  
 DS 2  
 SWH 6188.119 Hz  
 FIDRES 0.094423 Hz  
 AQ 5.2953587 sec  
 RG 90.5  
 DW 80.800 usec  
 DE 10.00 usec  
 TE 298.2 K  
 D1 1.00000000 sec  
 TD0 1

===== CHANNEL f1 =====  
 NUC1 1H  
 P1 10.00 usec  
 PL1 0.00 dB  
 PL1W 11.25325108 W  
 SFO1 300.1318534 MHz  
 SI 32768  
 SF 300.1299965 MHz  
 WDW EM  
 SSB 0  
 LB 0.30 Hz  
 GB 0  
 PC 1.00

3,6-Bis(4-ethylphenyl)-1-(4-methoxybenzyl)-2-*p*-tolylquinolin-4(1*H*)-one (15).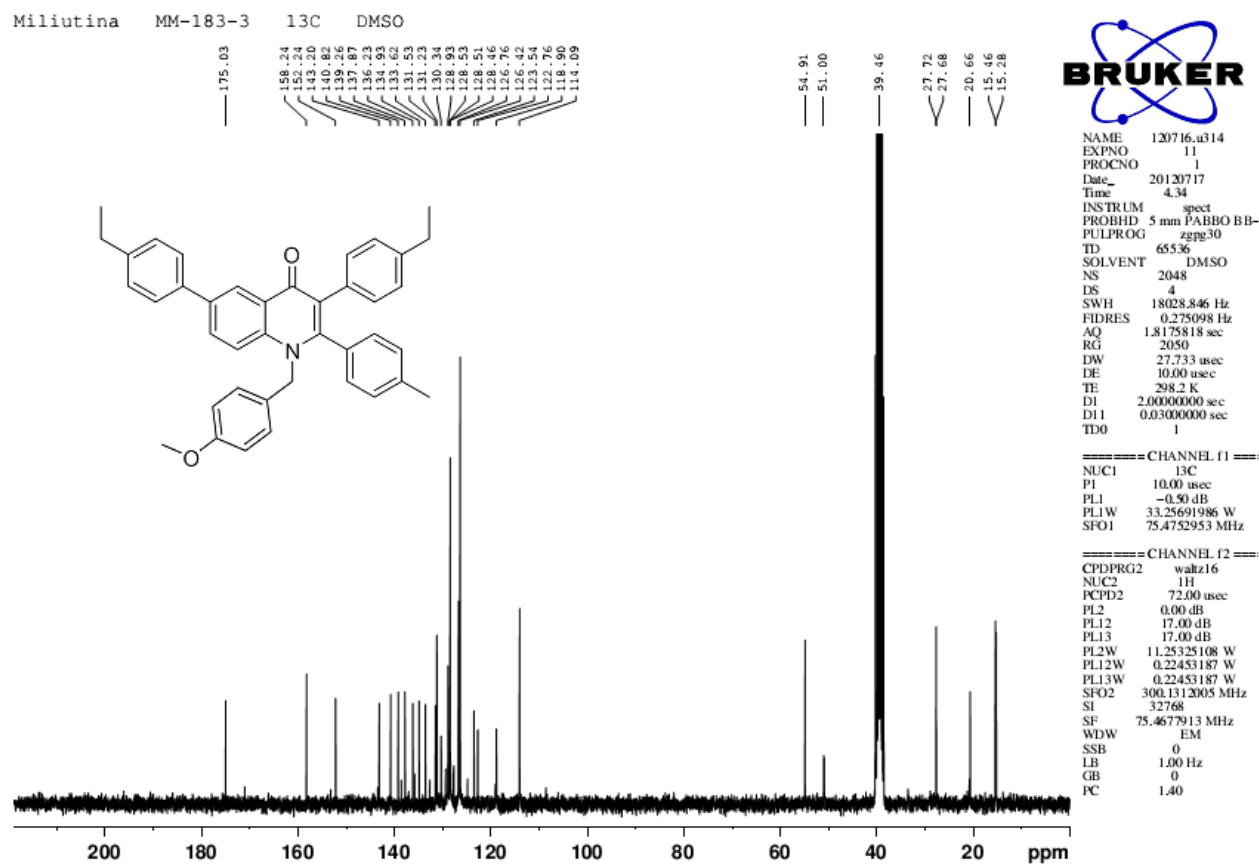

3,6-Bis(4-ethylphenyl)-4*H*-chromen-4-one (16).

Miliutina MM-181-2 1H DMSO

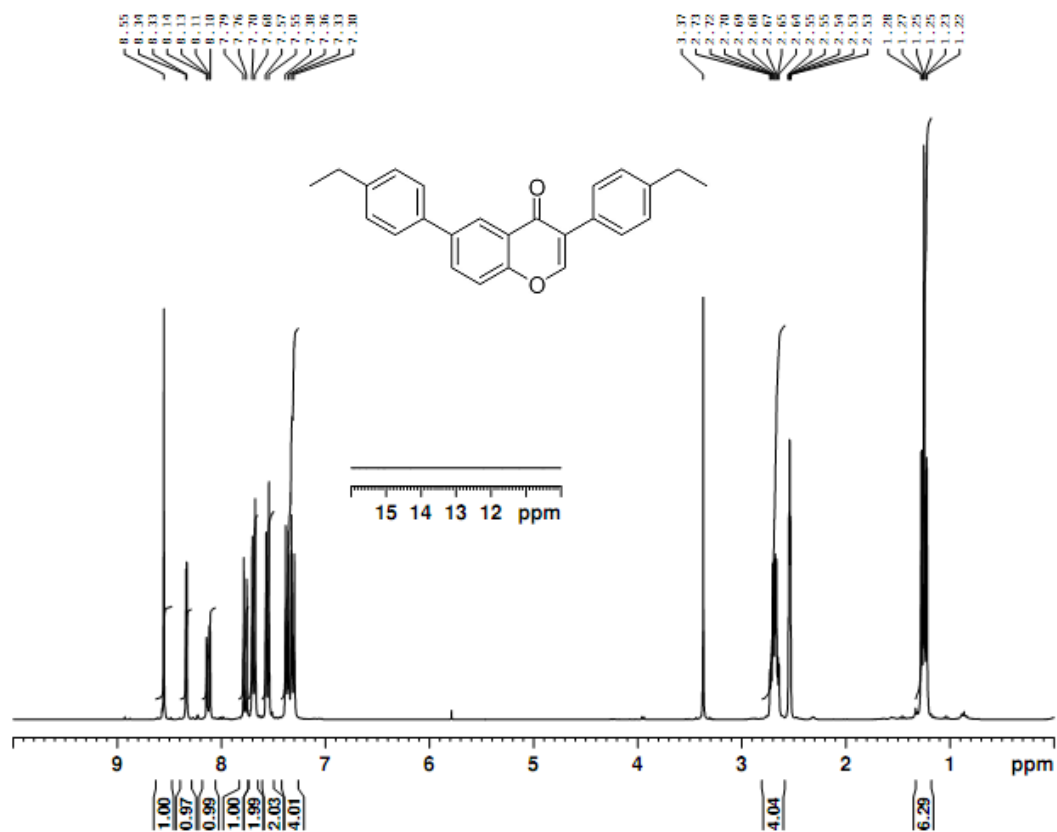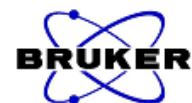

NAME 120621.u316  
 EXPNO 10  
 PROCNO 1  
 Date\_ 20120621  
 Time 12.32  
 INSTRUM spect  
 PROBHD 5 mm PABBO BB-  
 PULPROG zg30  
 TD 65536  
 SOLVENT DMSO  
 NS 16  
 DS 2  
 SWH 6188.119 Hz  
 FIDRES 0.094423 Hz  
 AQ 5.2953587 sec  
 RG 50.8  
 DW 80.800 usec  
 DE 10.00 usec  
 TE 298.6 K  
 D1 1.0000000 sec  
 TD0 1

===== CHANNEL f1 =====  
 NUC1 1H  
 P1 10.00 usec  
 PL1 0.00 dB  
 PL1W 11.25325108 W  
 SFO1 300.1318534 MHz  
 SI 32768  
 SF 300.1299964 MHz  
 WDW EM  
 SSB 0  
 LB 0.30 Hz  
 GB 0  
 PC 1.00

3,6-Bis(4-ethylphenyl)-4*H*-chromen-4-one (16).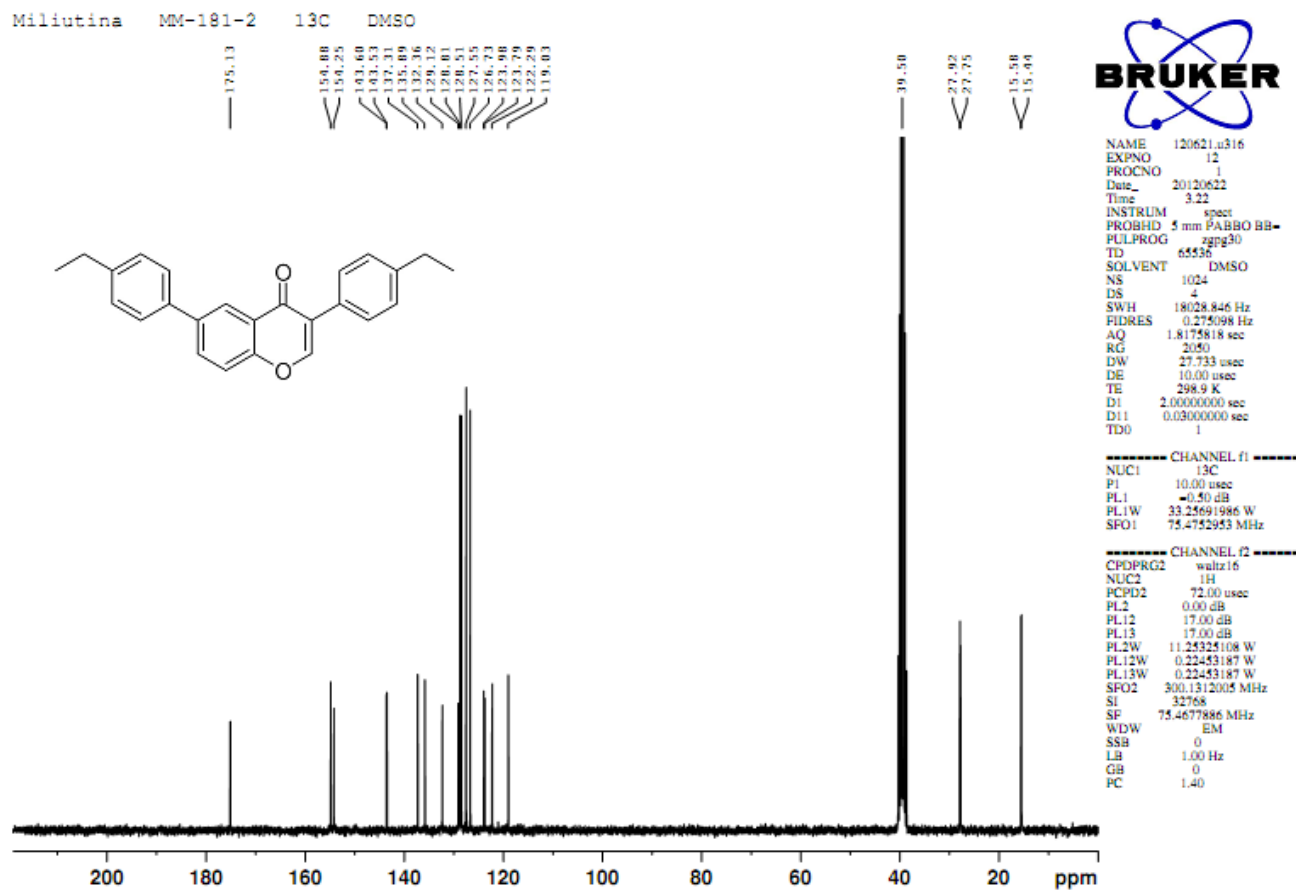

**X-Ray structure of compound 7ab**

|                                        |                                                               |                           |
|----------------------------------------|---------------------------------------------------------------|---------------------------|
| Identification code                    | is_mm127                                                      |                           |
| Empirical formula                      | C <sub>24</sub> H <sub>20</sub> N <sub>2</sub> O <sub>4</sub> |                           |
| Formula weight                         | 400.42                                                        |                           |
| Temperature                            | 173(2) K                                                      |                           |
| Wavelength                             | 0.71073 Å                                                     |                           |
| Crystal system                         | monoclinic                                                    |                           |
| Space group (H.-M.)                    | <i>P</i> 2 <sub>1</sub> / <i>c</i>                            |                           |
| Space group (Hall)                     | - <i>P</i> 2ybc                                               |                           |
| Unit cell dimensions                   | <i>a</i> = 10.4745(6) Å                                       | $\alpha = 90.00^\circ$    |
|                                        | <i>b</i> = 10.6976(6) Å                                       | $\beta = 91.384(3)^\circ$ |
|                                        | <i>c</i> = 17.8031(11) Å                                      | $\gamma = 90.00^\circ$    |
| Volume                                 | 1994.3(2) Å <sup>3</sup>                                      |                           |
| Z                                      | 4                                                             |                           |
| Calculated density                     | 1.334 mg/m <sup>3</sup>                                       |                           |
| Absorption coefficient                 | 0.092 mm <sup>-1</sup>                                        |                           |
| F(000)                                 | 840                                                           |                           |
| Crystal size                           | 0.37 x 0.13 x 0.07 mm <sup>3</sup>                            |                           |
| $\Theta$ range for data collection     | 1.94 to 28.00°                                                |                           |
| Index ranges                           | -13 ≤ <i>h</i> ≤ 13, -9 ≤ <i>k</i> ≤ 14, -23 ≤ <i>l</i> ≤ 22  |                           |
| Reflections collected                  | 19220                                                         |                           |
| Independent reflections                | 4810 [R(int) = 0.0664]                                        |                           |
| Completeness to $\Theta = 28.00^\circ$ | 100.0%                                                        |                           |
| Absorption correction                  | Multi-scan                                                    |                           |
| Max. and min. transmission             | 0.9936 and 0.9668                                             |                           |
| Refinement method                      | Full-matrix least-squares on F <sup>2</sup>                   |                           |
| Data / restraints / parameters         | 2565 / 0 / 273                                                |                           |
| Goodness-of-fit on F <sup>2</sup>      | 1.000                                                         |                           |
| Final R indices [I > 2 $\sigma$ (I)]   | R1 = 0.0505, wR2 = 0.1045                                     |                           |
| R indices (all data)                   | R1 = 0.1164, wR2 = 0.1328                                     |                           |
| Largest diff. peak and hole            | 0.167 and -0.270 e.Å <sup>-3</sup>                            |                           |

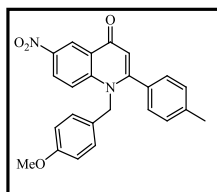

**X-Ray structure of compound 7ac**

|                                   |                                                               |         |
|-----------------------------------|---------------------------------------------------------------|---------|
| Identification code               | is_mm115_118                                                  |         |
| Empirical formula                 | C <sub>24</sub> H <sub>20</sub> N <sub>2</sub> O <sub>3</sub> |         |
| Formula weight                    | 384.42                                                        |         |
| Temperature                       | 173(2) K                                                      |         |
| Wavelength                        | 0.71073 Å                                                     |         |
| Crystal system                    | orthorhombic                                                  |         |
| Space group (H.-M.)               | <i>P</i> 2 <sub>1</sub> 2 <sub>1</sub> 2 <sub>1</sub>         |         |
| Space group (Hall)                | <i>P</i> 2ac 2ab                                              |         |
| Unit cell dimensions              | a = 9.9322(10) Å                                              | α = 90° |
|                                   | b = 13.6154(10) Å                                             | β = 90° |
|                                   | c = 14.4052(15) Å                                             | γ = 90° |
| Volume                            | 1948.0(3) Å <sup>3</sup>                                      |         |
| Z                                 | 4                                                             |         |
| Calculated density                | 1.311 mg/m <sup>3</sup>                                       |         |
| Absorption coefficient            | 0.087 mm <sup>-1</sup>                                        |         |
| F(000)                            | 808                                                           |         |
| Crystal size                      | 0.430 x 0.170 x 0.140 mm <sup>3</sup>                         |         |
| Θ range for data collection       | 3.628 to 28.999°                                              |         |
| Index ranges                      | -13 ≤ h ≤ 13, -11 ≤ k ≤ 17, -19 ≤ l ≤ 19                      |         |
| Reflections collected             | 15463                                                         |         |
| Independent reflections           | 5004 [R(int) = 0.0466]                                        |         |
| Completeness to Θ = 28.00°        | 96.9%                                                         |         |
| Absorption correction             | Multi-scan                                                    |         |
| Max. and min. transmission        | 0.7460 and 0.6977                                             |         |
| Refinement method                 | Full-matrix least-squares on F <sup>2</sup>                   |         |
| Data / restraints / parameters    | 3347 / 0 / 265                                                |         |
| Goodness-of-fit on F <sup>2</sup> | 1.074                                                         |         |
| Final R indices [I > 2σ (I)]      | R1 = 0.0414, wR2 = 0.0724                                     |         |
| R indices (all data)              | R1 = 0.0851, wR2 = 0.0959                                     |         |
| Largest diff. peak and hole       | 0.191 and -0.178 e.Å <sup>-3</sup>                            |         |

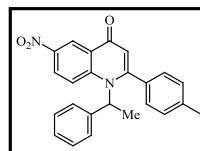

**X-Ray structure of compound 7bd**

|                                        |                                                               |                        |
|----------------------------------------|---------------------------------------------------------------|------------------------|
| Identification code                    | av_mm89                                                       |                        |
| Empirical formula                      | C <sub>24</sub> H <sub>20</sub> N <sub>2</sub> O <sub>3</sub> |                        |
| Formula weight                         | 384.42                                                        |                        |
| Temperature                            | 173(2) K                                                      |                        |
| Wavelength                             | 0.71073 Å                                                     |                        |
| Crystal system                         | orthorhombic                                                  |                        |
| Space group (H.-M.)                    | P b c a                                                       |                        |
| Space group (Hall)                     | -P 2ac 2ab                                                    |                        |
| Unit cell dimensions                   | a = 10.4213(5) Å                                              | $\alpha = 90.00^\circ$ |
|                                        | b = 15.0974(8) Å                                              | $\beta = 90.00^\circ$  |
|                                        | c = 24.6279(14) Å                                             | $\gamma = 90.00^\circ$ |
| Volume                                 | 3874.8(4) Å <sup>3</sup>                                      |                        |
| Z                                      | 8                                                             |                        |
| Calculated density                     | 1.318 mg/m <sup>3</sup>                                       |                        |
| Absorption coefficient                 | 0.088 mm <sup>-1</sup>                                        |                        |
| F(000)                                 | 1616                                                          |                        |
| Crystal size                           | 0.68 x 0.20 x 0.15 mm <sup>3</sup>                            |                        |
| $\Theta$ range for data collection     | 2.51 to 30.00°                                                |                        |
| Index ranges                           | -14 ≤ h ≤ 12, -19 ≤ k ≤ 21, -34 ≤ l ≤ 24                      |                        |
| Reflections collected                  | 22580                                                         |                        |
| Independent reflections                | 5541 [R(int) = 0.0292]                                        |                        |
| Completeness to $\Theta = 28.00^\circ$ | 98.0%                                                         |                        |
| Absorption correction                  | Multi-scan                                                    |                        |
| Max. and min. transmission             | 0.9870 and 0.9427                                             |                        |
| Refinement method                      | Full-matrix least-squares on F <sup>2</sup>                   |                        |
| Data / restraints / parameters         | 3855 / 0 / 262                                                |                        |
| Goodness-of-fit on F <sup>2</sup>      | 1.049                                                         |                        |
| Final R indices [I > 2 $\sigma$ (I)]   | R1 = 0.0493, wR2 = 0.1103                                     |                        |
| R indices (all data)                   | R1 = 0.0799, wR2 = 0.1234                                     |                        |
| Largest diff. peak and hole            | 0.208 and -0.245 e.Å <sup>-3</sup>                            |                        |

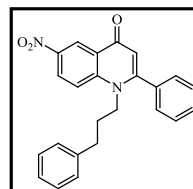



**X-Ray structure of compound 15**

|                                        |                                                                              |                             |
|----------------------------------------|------------------------------------------------------------------------------|-----------------------------|
| Identification code                    | is_mm183                                                                     |                             |
| Empirical formula                      | C <sub>39</sub> .74 H <sub>36</sub> .71 Br <sub>0</sub> .03 N O <sub>2</sub> |                             |
| Formula weight                         | 562.69                                                                       |                             |
| Temperature                            | 173(2) K                                                                     |                             |
| Wavelength                             | 0.71073 Å                                                                    |                             |
| Crystal system                         | triclinic                                                                    |                             |
| Space group (H.-M.)                    | $P\bar{1}$                                                                   |                             |
| Space group (Hall)                     | -P 1                                                                         |                             |
| Unit cell dimensions                   | a = 10.5670(5) Å                                                             | $\alpha = 109.863(2)^\circ$ |
|                                        | b = 12.7739(5) Å                                                             | $\beta = 101.516(2)^\circ$  |
|                                        | c = 12.9152(5) Å                                                             | $\gamma = 105.361(2)^\circ$ |
| Volume                                 | 1498.23(11) Å <sup>3</sup>                                                   |                             |
| Z                                      | 2                                                                            |                             |
| Calculated density                     | 1.247 mg/m <sup>3</sup>                                                      |                             |
| Absorption coefficient                 | 0.115 mm <sup>-1</sup>                                                       |                             |
| F(000)                                 | 598                                                                          |                             |
| Crystal size                           | 0.24 x 0.22 x 0.05 mm <sup>3</sup>                                           |                             |
| $\Theta$ range for data collection     | 2.80 to 30.00°                                                               |                             |
| Index ranges                           | -14 ≤ h ≤ 14, -17 ≤ k ≤ 17, -18 ≤ l ≤ 18                                     |                             |
| Reflections collected                  | 39715                                                                        |                             |
| Independent reflections                | 8694 [R(int) = 0.0471]                                                       |                             |
| Completeness to $\Theta = 28.00^\circ$ | 99.6%                                                                        |                             |
| Absorption correction                  | Multi-scan                                                                   |                             |
| Max. and min. transmission             | 0.9943 and 0.9728                                                            |                             |
| Refinement method                      | Full-matrix least-squares on F <sup>2</sup>                                  |                             |
| Data / restraints / parameters         | 5050 / 0 / 396                                                               |                             |
| Goodness-of-fit on F <sup>2</sup>      | 1.013                                                                        |                             |
| Final R indices [I > 2σ (I)]           | R1 = 0.0558, wR2 = 0.1135                                                    |                             |
| R indices (all data)                   | R1 = 0.1178, wR2 = 0.1406                                                    |                             |
| Largest diff. peak and hole            | 0.445 and -0.255 e.Å <sup>-3</sup>                                           |                             |

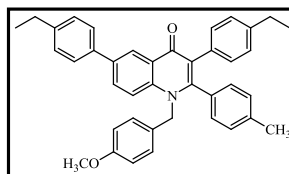

**X-Ray structure of compound 16**

|                                        |                                                |                           |
|----------------------------------------|------------------------------------------------|---------------------------|
| Identification code                    | ch_mm181                                       |                           |
| Empirical formula                      | C <sub>25</sub> H <sub>22</sub> O <sub>2</sub> |                           |
| Formula weight                         | 354.43                                         |                           |
| Temperature                            | 173(2) K                                       |                           |
| Wavelength                             | 0.71073 Å                                      |                           |
| Crystal system                         | monoclinic                                     |                           |
| Space group (H.-M.)                    | <i>P</i> 2 <sub>1</sub> / <i>n</i>             |                           |
| Space group (Hall)                     | -P 2yn                                         |                           |
| Unit cell dimensions                   | a = 5.8177(4) Å                                | $\alpha = 90.00^\circ$    |
|                                        | b = 10.2341(6) Å                               | $\beta = 94.982(2)^\circ$ |
|                                        | c = 31.4579(18) Å                              | $\gamma = 90.00^\circ$    |
| Volume                                 | 1865.9(2) Å <sup>3</sup>                       |                           |
| Z                                      | 4                                              |                           |
| Calculated density                     | 1.262 mg/m <sup>3</sup>                        |                           |
| Absorption coefficient                 | 0.079 mm <sup>-1</sup>                         |                           |
| F(000)                                 | 752                                            |                           |
| Crystal size                           | 0.57 x 0.16 x 0.15 mm <sup>3</sup>             |                           |
| $\Theta$ range for data collection     | 1.30 to 28.00°                                 |                           |
| Index ranges                           | -7 ≤ h ≤ 7, -13 ≤ k ≤ 13, -41 ≤ l ≤ 41         |                           |
| Reflections collected                  | 24058                                          |                           |
| Independent reflections                | 4514 [R(int) = 0.0339]                         |                           |
| Completeness to $\Theta = 28.00^\circ$ | 99.9%                                          |                           |
| Absorption correction                  | Multi-scan                                     |                           |
| Max. and min. transmission             | 0.9883 and 0.9566                              |                           |
| Refinement method                      | Full-matrix least-squares on F <sup>2</sup>    |                           |
| Data / restraints / parameters         | 3522 / 0 / 273                                 |                           |
| Goodness-of-fit on F <sup>2</sup>      | 1.017                                          |                           |
| Final R indices [I > 2 $\sigma$ (I)]   | R1 = 0.0513, wR2 = 0.1247                      |                           |
| R indices (all data)                   | R1 = 0.0674, wR2 = 0.1374                      |                           |
| Largest diff. peak and hole            | 0.488 and -0.350 e.Å <sup>-3</sup>             |                           |

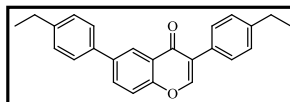

Supplement: c5ra10948e1.pdf [file c5ra10948e1.pdf]
